# Supplementary material for: Nickel-Catalyzed Kumada Cross-Coupling Reactions of Benzylic Sulfonamides
Source: MDPI journal article supplement (doi:10.3390/molecules26195947), 2021-09-30
Supplement: s1 [file s1]

# <sup>1</sup>H spectrum

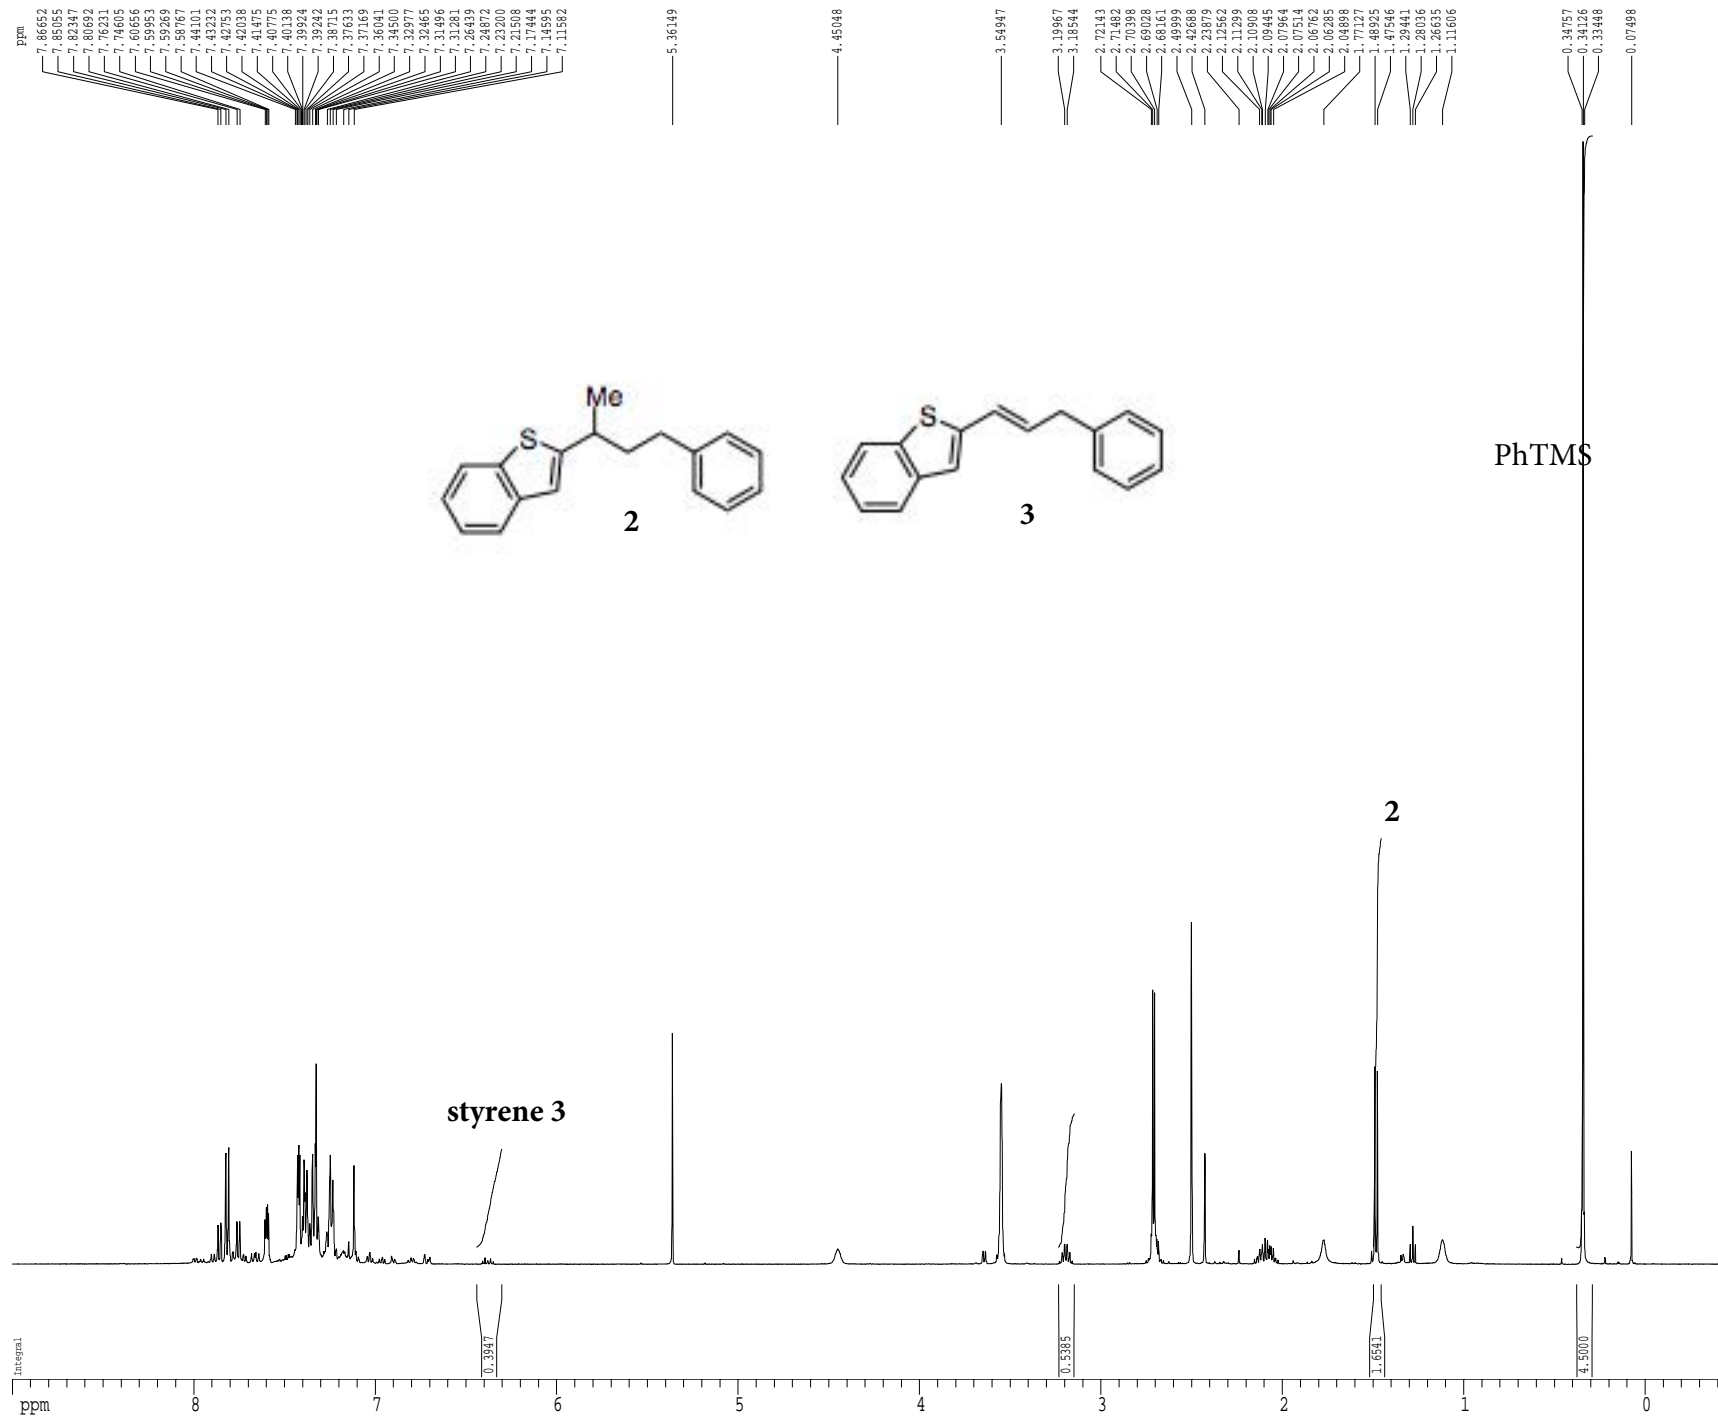

Current Data Parameters  
 USER khewitt1  
 NAME KAH-I-186  
 EXPNO 2  
 PROCNO 1

F2 - Acquisition Parameters  
 Date\_ 20181105  
 Time 14.50  
 INSTRUM cryo500  
 PROBHD 5 mm CPTCI 1H-  
 PULPROG zg30  
 TD 48074  
 SOLVENT CDC13T  
 NS 8  
 DS 2  
 SWH 8012.820 Hz  
 FIDRES 0.166677 Hz  
 AQ 2.9998677 sec  
 RG 7.1  
 DW 62.400 usec  
 DE 6.00 usec  
 TE 298.0 K  
 D1 0.10000000 sec  
 MCREST 0.00000000 sec  
 MCWREK 0.01500000 sec

===== CHANNEL f1 =====  
 NUC1 1H  
 P1 7.50 usec  
 PL1 1.60 dB  
 SFO1 500.2235015 MHz

F2 - Processing parameters  
 SI 65536  
 SF 500.2200000 MHz  
 WDW no  
 SSB 0  
 LB 0.00 Hz  
 GB 0  
 PC 1.00

1D NMR plot parameters  
 CY 22.80 cm  
 CY 15.00 cm  
 F1P 9.000 ppm  
 F1 4501.98 Hz  
 F2P -0.500 ppm  
 F2 -250.11 Hz  
 PPMCM 0.41667 ppm/cm  
 HZCM 208.42500 Hz/cm

# <sup>1</sup>H spectrum

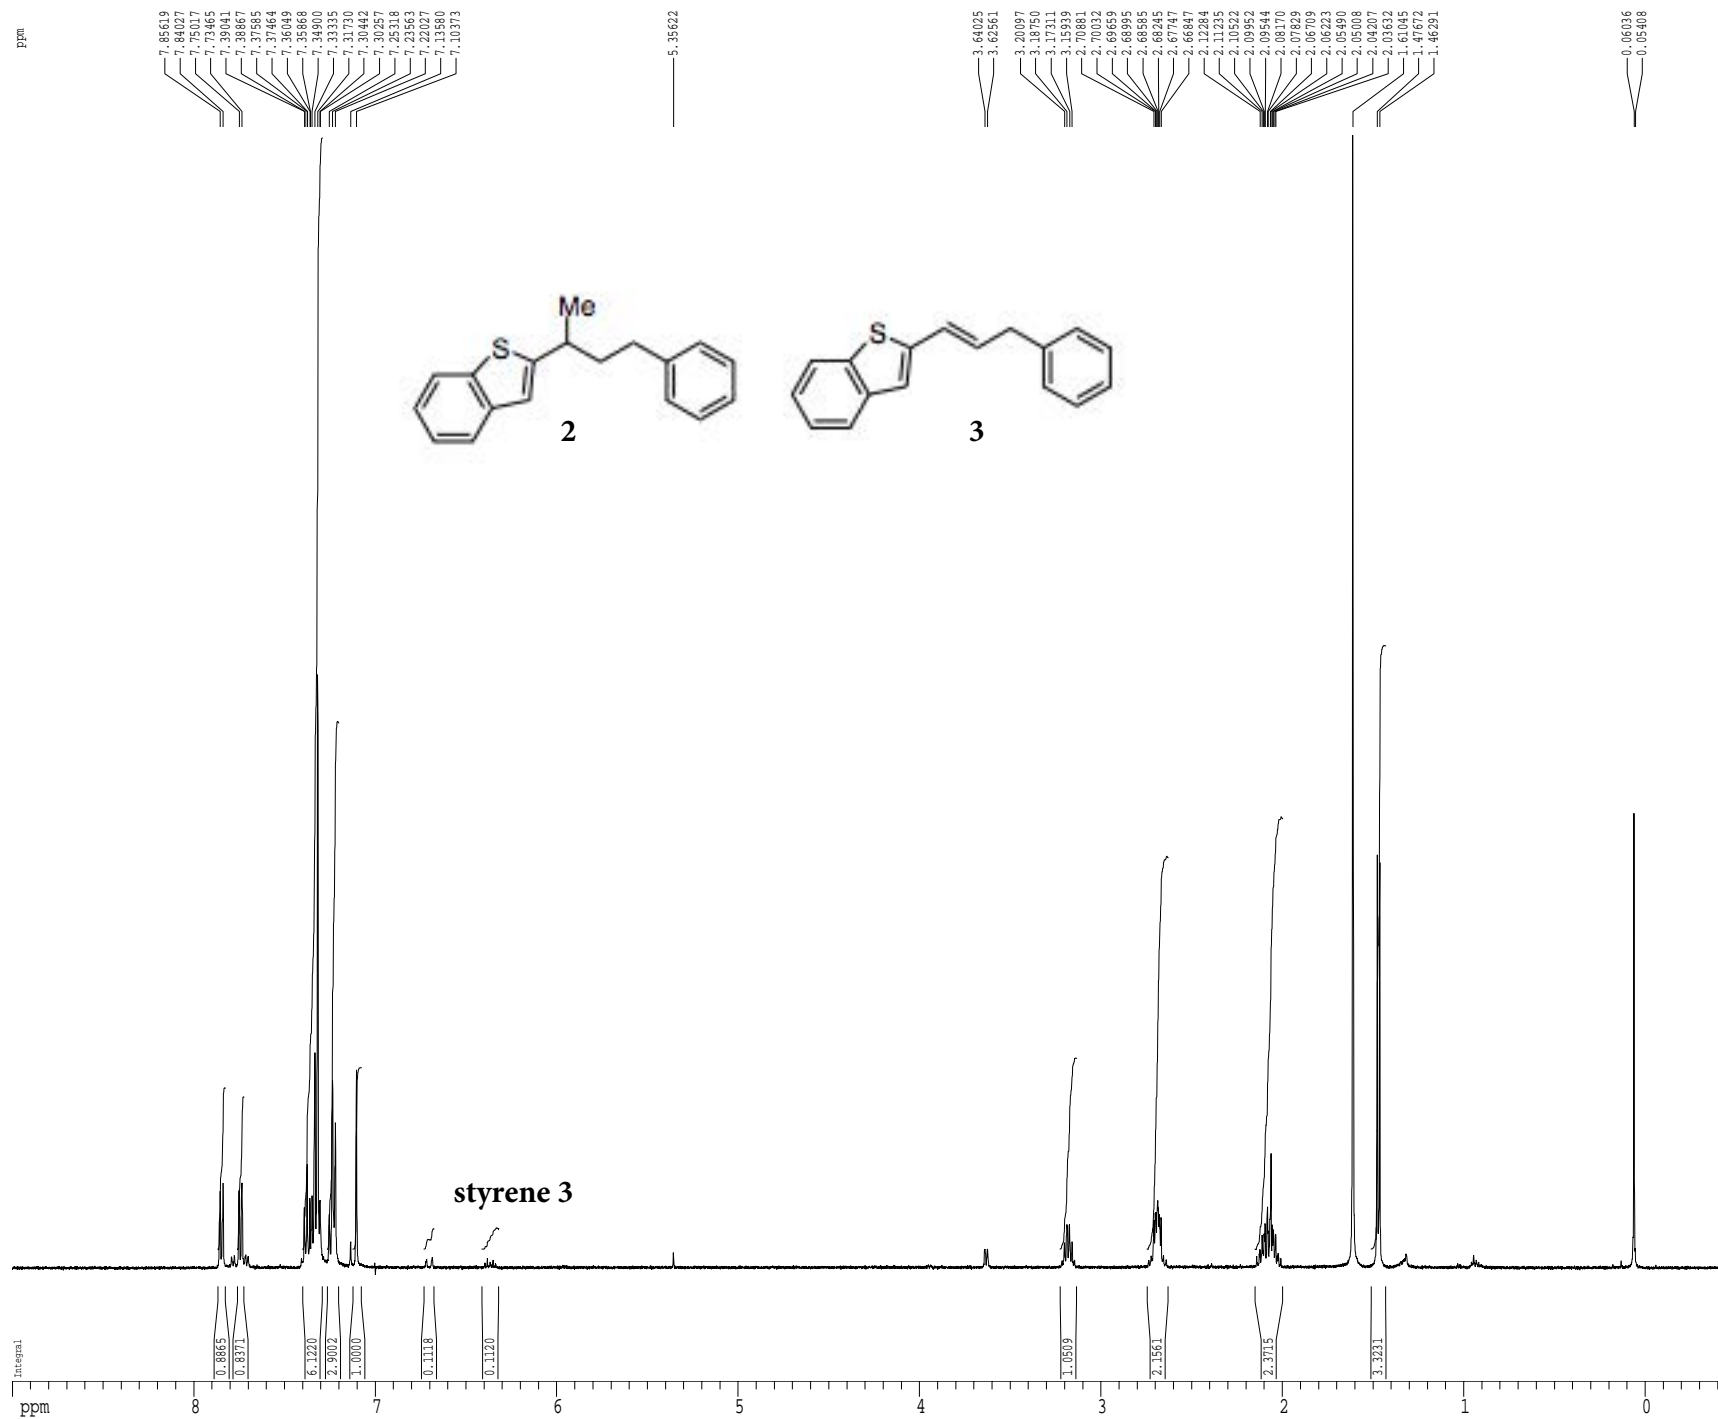

Current Data Parameters

|        |             |
|--------|-------------|
| USER   | khewitt1    |
| NAME   | KAH-1-200-Z |
| EXPNO  | 4           |
| PROCNO | 1           |

F2 - Acquisition Parameters

|         |                |
|---------|----------------|
| Date_   | 20210909       |
| Time    | 16.37          |
| INSTRUM | gn500          |
| PROBHD  | 5 mm broadband |
| PULPROG | zg30           |
| TD      | 48074          |
| SOLVENT | CDC13T         |
| NS      | 8              |
| DS      | 2              |
| SWH     | 8012.820 Hz    |
| FIDRES  | 0.166677 Hz    |
| AQ      | 2.9998677 sec  |
| RG      | 1824.6         |
| DW      | 62.400 usec    |
| DE      | 6.00 usec      |
| TE      | 298.0 K        |
| D1      | 0.10000000 sec |
| MCREST  | 0.00000000 sec |
| MCNRC   | 0.01500000 sec |

===== CHANNEL f1 =====

|      |                 |
|------|-----------------|
| NUC1 | 1H              |
| P1   | 12.00 usec      |
| PL1  | -6.00 dB        |
| SFO1 | 498.6534906 MHz |

F2 - Processing parameters

|     |                 |
|-----|-----------------|
| SI  | 65536           |
| SF  | 498.6500000 MHz |
| WDW | no              |
| SSB | 0               |
| LB  | 0.00 Hz         |
| GB  | 0               |
| PC  | 1.00            |

1D NMR plot parameters

|       |                 |
|-------|-----------------|
| CY    | 22.80 cm        |
| CY    | 15.00 cm        |
| F1P   | 9.000 ppm       |
| F1    | 4487.85 Hz      |
| F2P   | -0.500 ppm      |
| F2    | -249.32 Hz      |
| PPMCM | 0.41667 ppm/cm  |
| HZCM  | 207.77084 Hz/cm |

## Sample Calculation

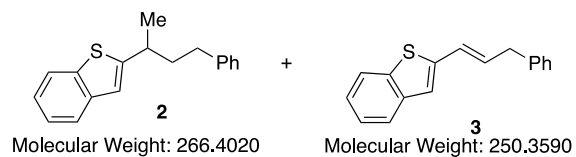

Based on the NMR above: the ratio of compounds **3/2**:

integration of **2** = 1.05

integration of **3** = 0.11

$$r_{3/2} = \frac{0.11}{1.05} = 0.0948$$

14 mg total was isolated from column chromatography

theoretical yield = 0.20 mmol

$$\text{mmol of } \mathbf{2} = \frac{14}{266.40 + (250.36 \cdot 0.0948)} = 0.0483$$

$$\text{Yield of } \mathbf{2} = \frac{0.0483}{0.20} = 24\%$$

$$\text{Yield of } \mathbf{3} = \frac{0.0483 \cdot 0.0948}{0.20} = 2.2\%$$

# Z-restored spin-echo 13C spectrum with 1H decoupling

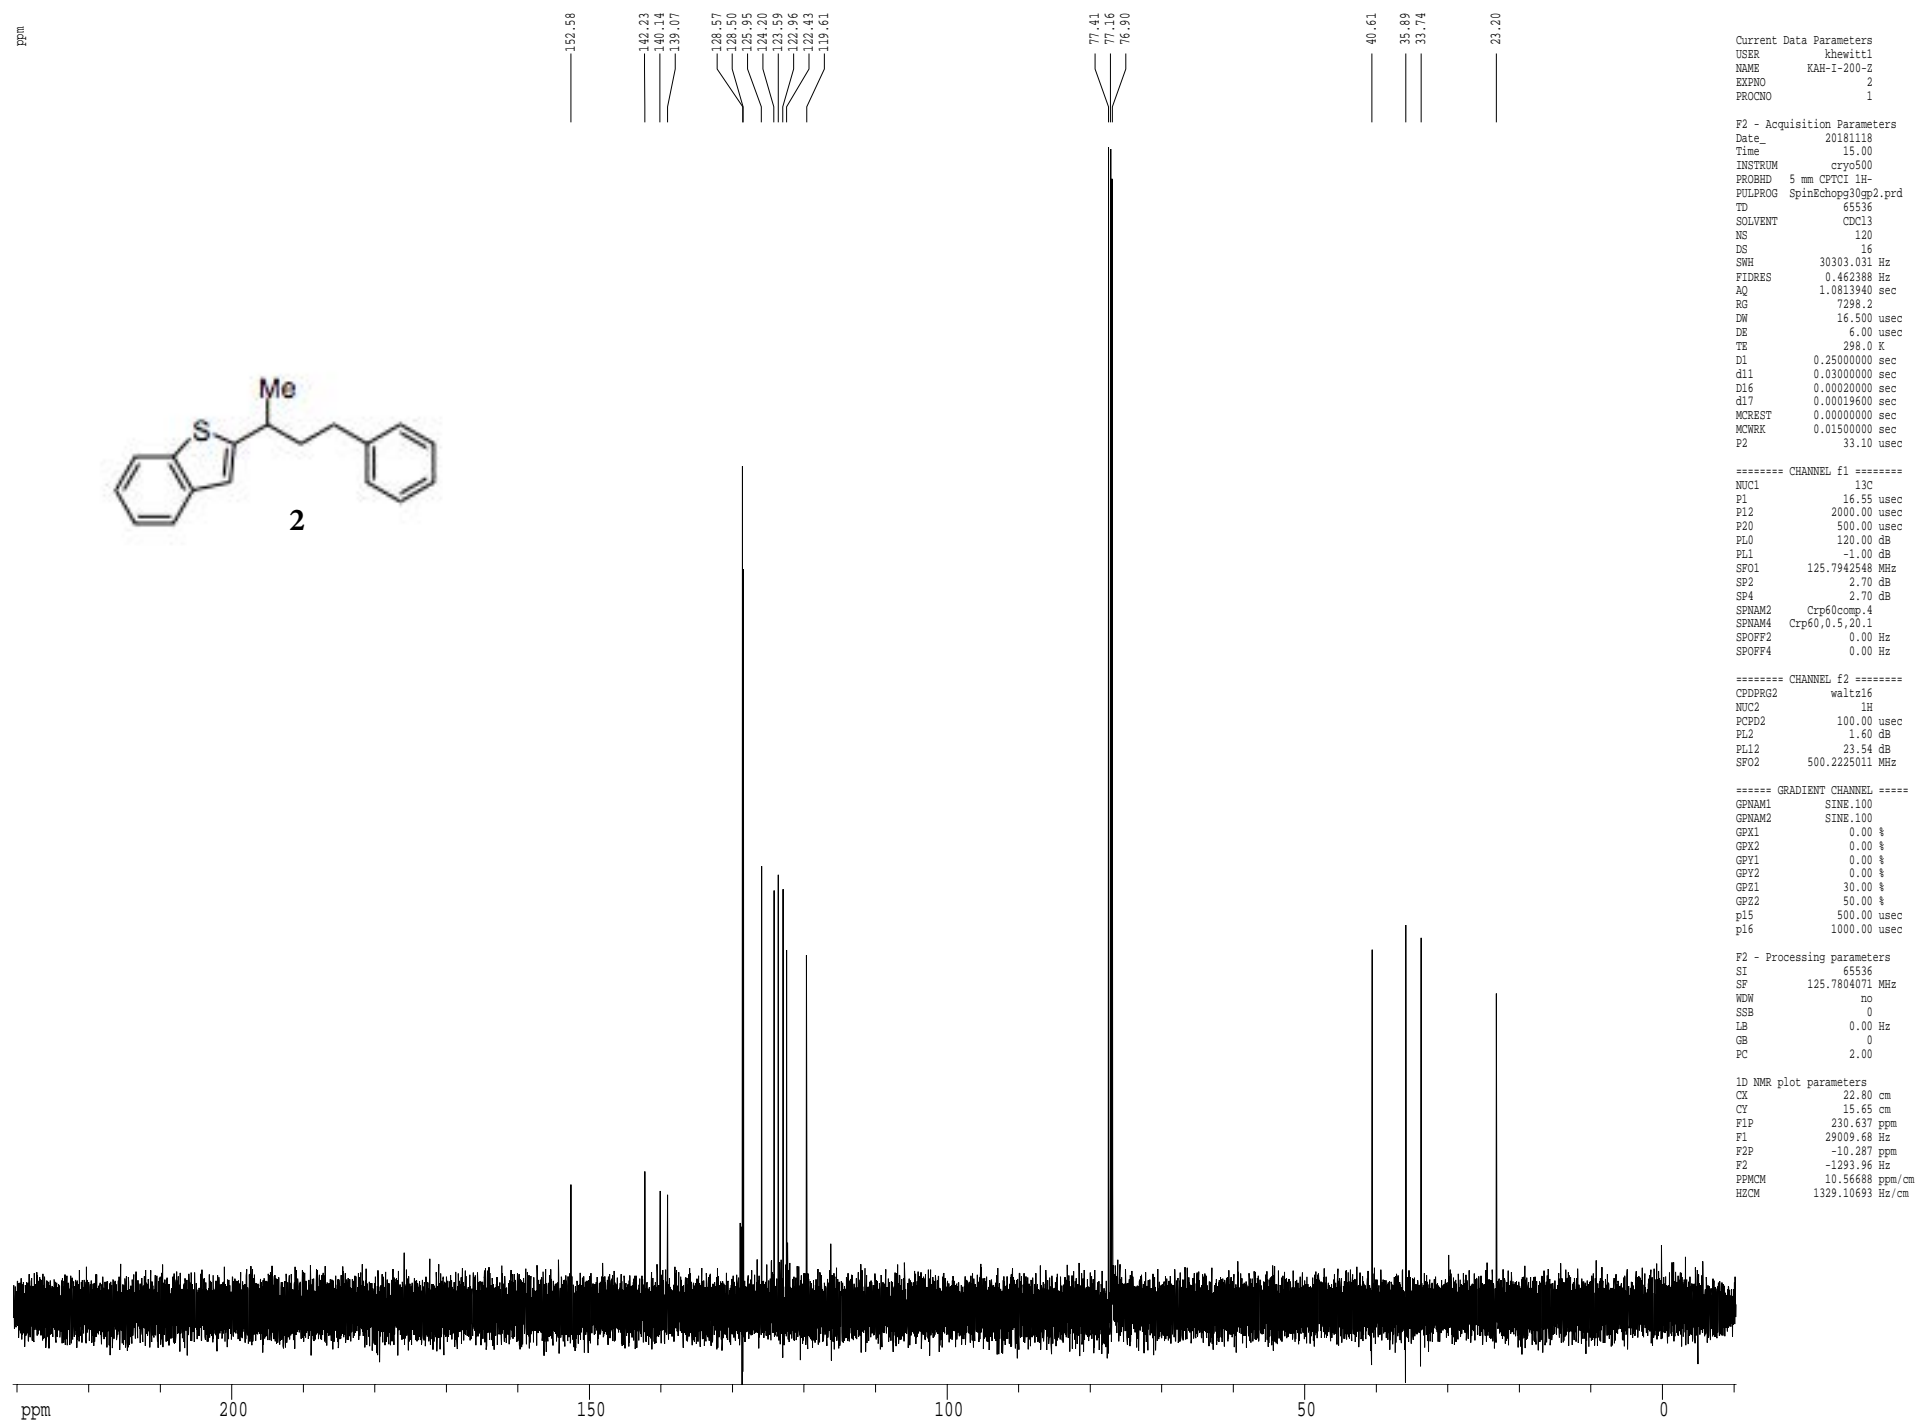

# <sup>1</sup>H spectrum

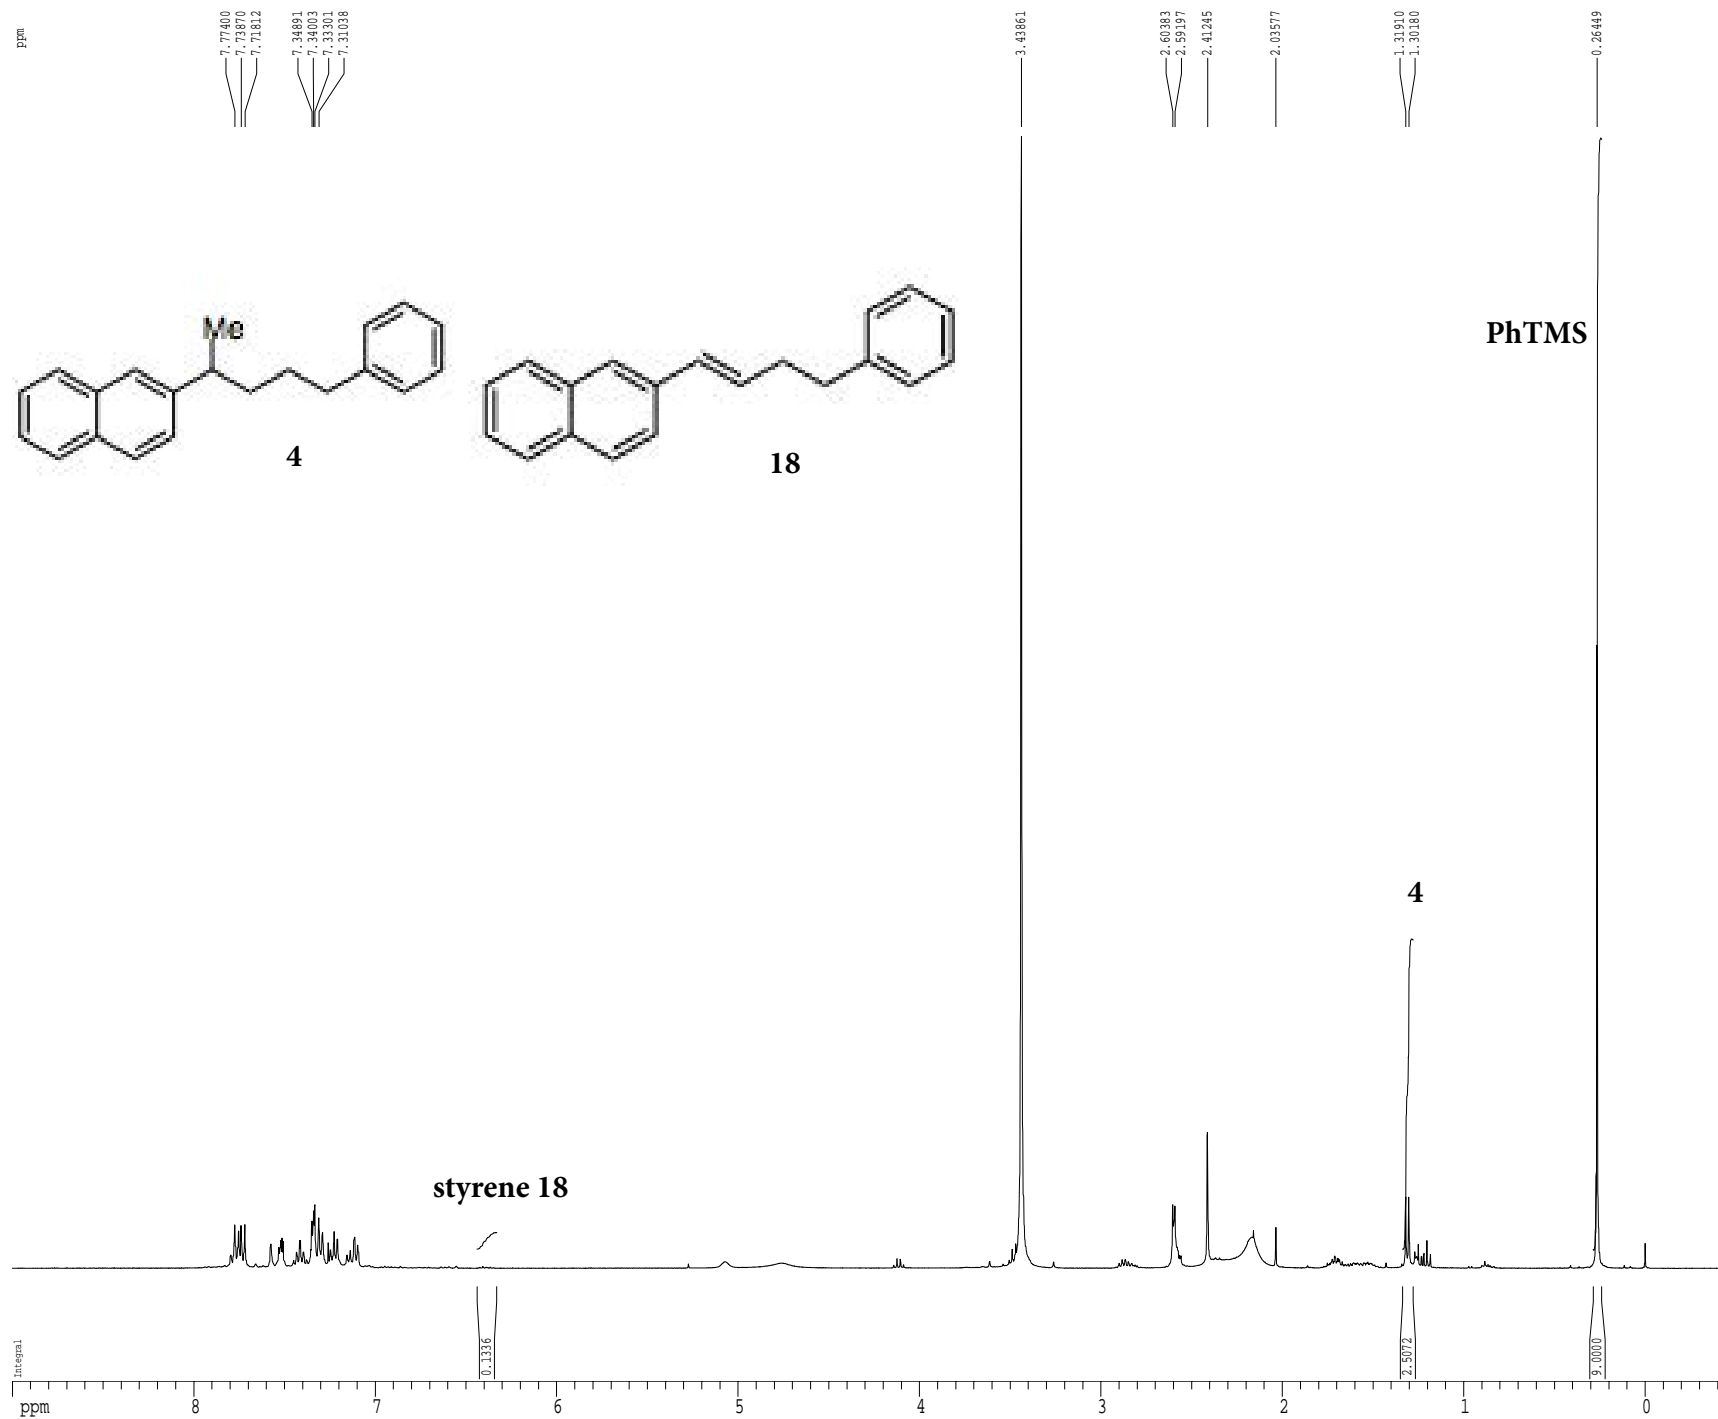

Current Data Parameters  
 USER khewitt1  
 NAME ACM-I-68NRY  
 EXPNO 1  
 PROCNO 1

F2 - Acquisition Parameters  
 Date\_ 20190812  
 Time 9.26  
 INSTRUM drx400  
 PROBHD 5 mm QNP H/F/P  
 PULPROG zg30  
 TD 65536  
 SOLVENT CDC13T  
 NS 8  
 DS 2  
 SWH 6410.256 Hz  
 FIDRES 0.097813 Hz  
 AQ 5.1118579 sec  
 RG 71.8  
 DW 78.000 usec  
 DE 4.50 usec  
 TE 298.0 K  
 D1 0.10000000 sec  
 MCREST 0.00000000 sec  
 MCWREK 0.01500000 sec

===== CHANNEL f1 =====  
 NUC1 1H  
 P1 12.00 usec  
 PL1 -1.10 dB  
 SFO1 400.1328009 MHz

F2 - Processing parameters  
 SI 65536  
 SF 400.1300215 MHz  
 WDW no  
 SSB 0  
 LB 0.00 Hz  
 GB 0  
 PC 2.00

1D NMR plot parameters  
 CY 22.80 cm  
 CY 15.00 cm  
 F1P 9.000 ppm  
 F1 3601.17 Hz  
 F2P -0.500 ppm  
 F2 -200.06 Hz  
 PPMCM 0.41667 ppm/cm  
 HZCM 166.72086 Hz/cm

# <sup>1</sup>H spectrum

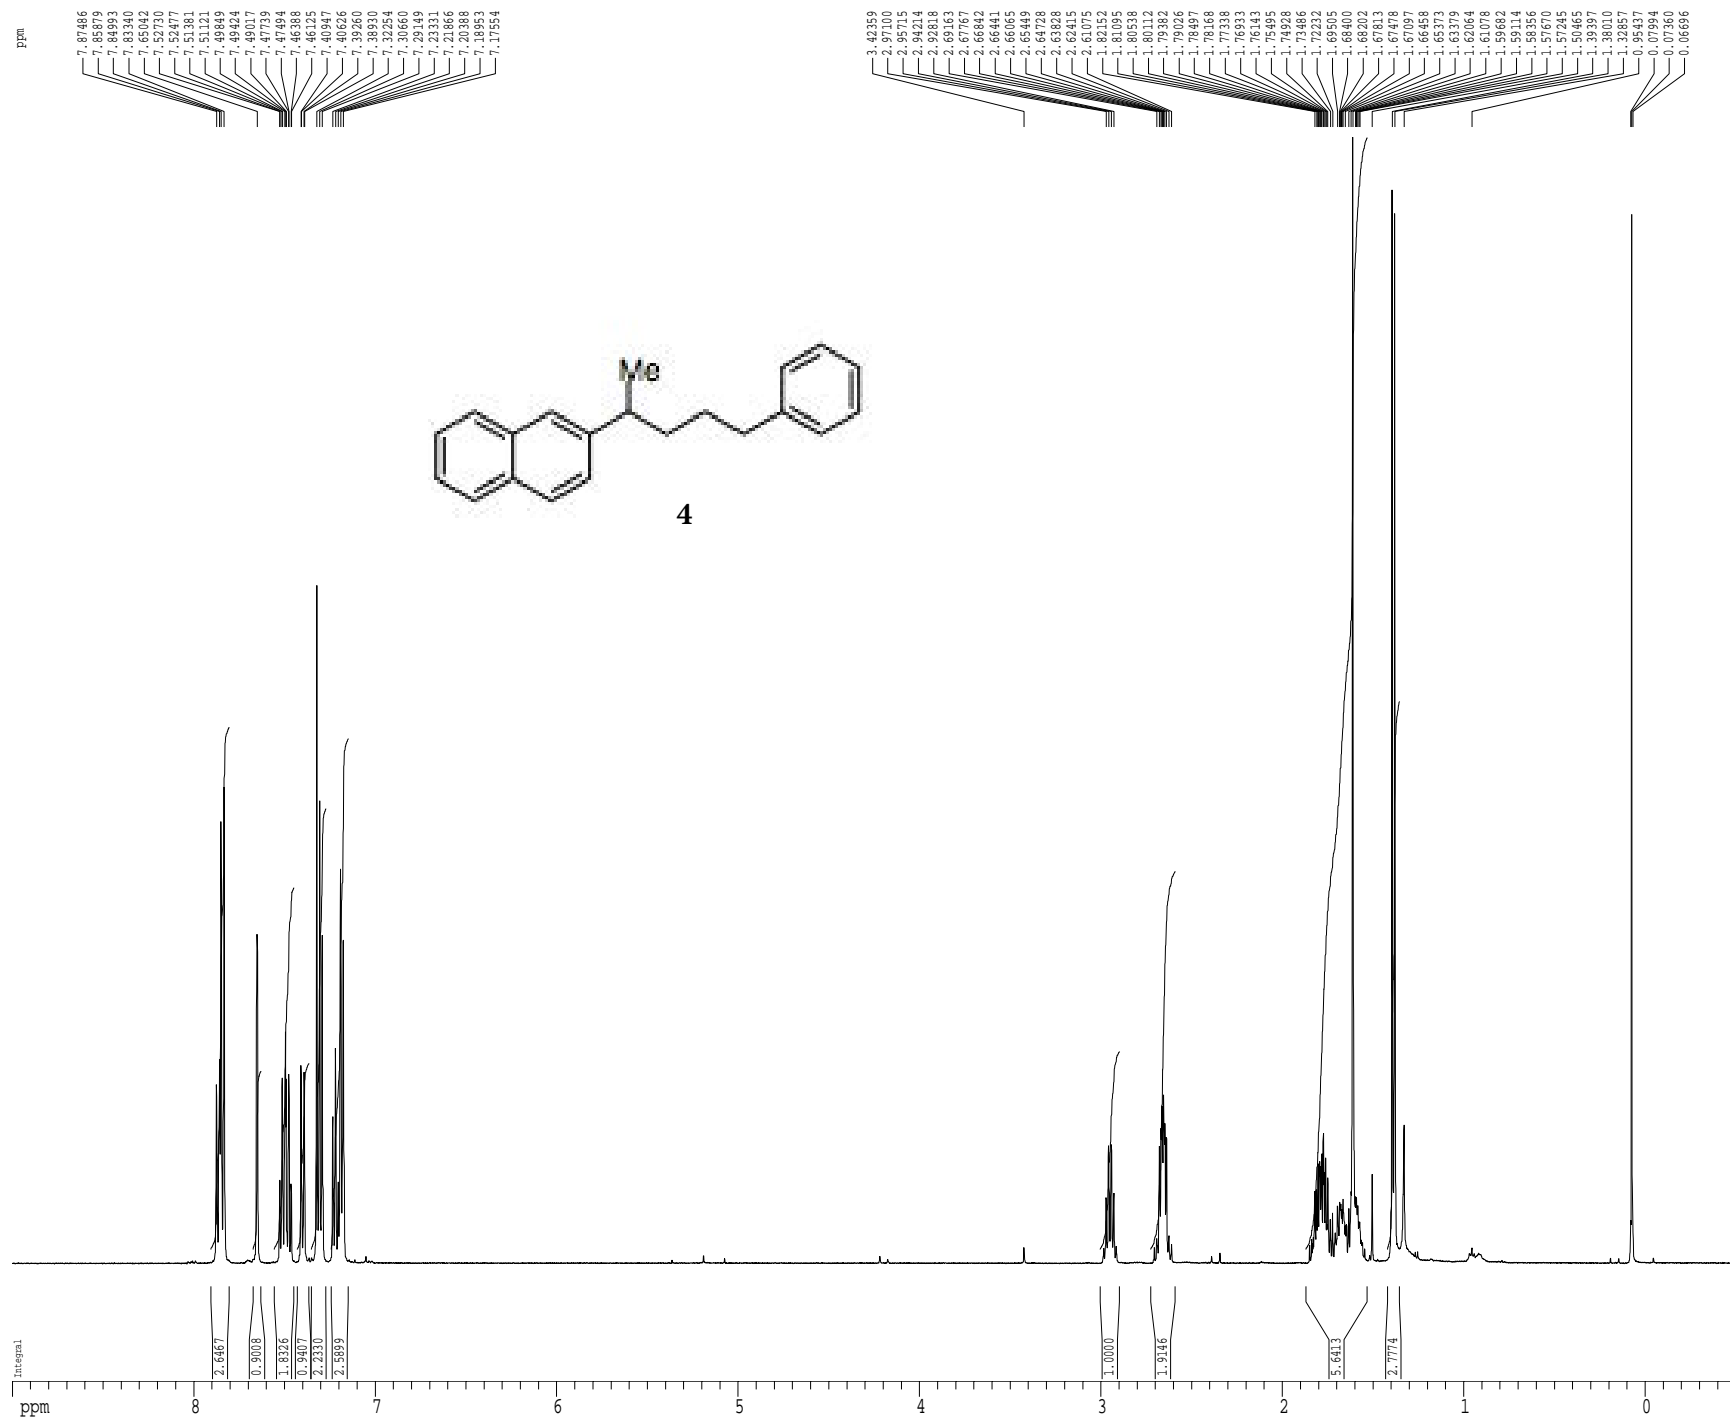

Current Data Parameters  
 USER khewitt1  
 NAME AM-1-123-Z  
 EXPNO 1  
 PROCNO 1

F2 - Acquisition Parameters  
 Date\_ 20210809  
 Time 18.21  
 INSTRUM cryo500  
 PROBHD 5 mm CPTCI 1H-  
 PULPROG zg30  
 TD 48074  
 SOLVENT CDC13T  
 NS 8  
 DS 2  
 SWH 8012.820 Hz  
 FIDRES 0.166677 Hz  
 AQ 2.9998677 sec  
 RG 8  
 DW 62.400 usec  
 DE 6.00 usec  
 TE 298.0 K  
 D1 0.10000000 sec  
 MCREST 0.00000000 sec  
 MCWRE 0.01500000 sec

===== CHANNEL f1 =====  
 NUC1 1H  
 P1 9.75 usec  
 PL1 1.60 dB  
 SFO1 500.2235015 MHz

F2 - Processing parameters  
 SI 65536  
 SF 500.2200000 MHz  
 WDW no  
 SSB 0  
 LB 0.00 Hz  
 GB 0  
 PC 1.00

1D NMR plot parameters  
 CY 22.80 cm  
 CY 15.00 cm  
 F1P 9.000 ppm  
 F1 4501.98 Hz  
 F2P -0.500 ppm  
 F2 -250.11 Hz  
 PPMCM 0.41667 ppm/cm  
 HZCM 208.42500 Hz/cm

# Z-restored spin-echo 13C spectrum with 1H decoupling

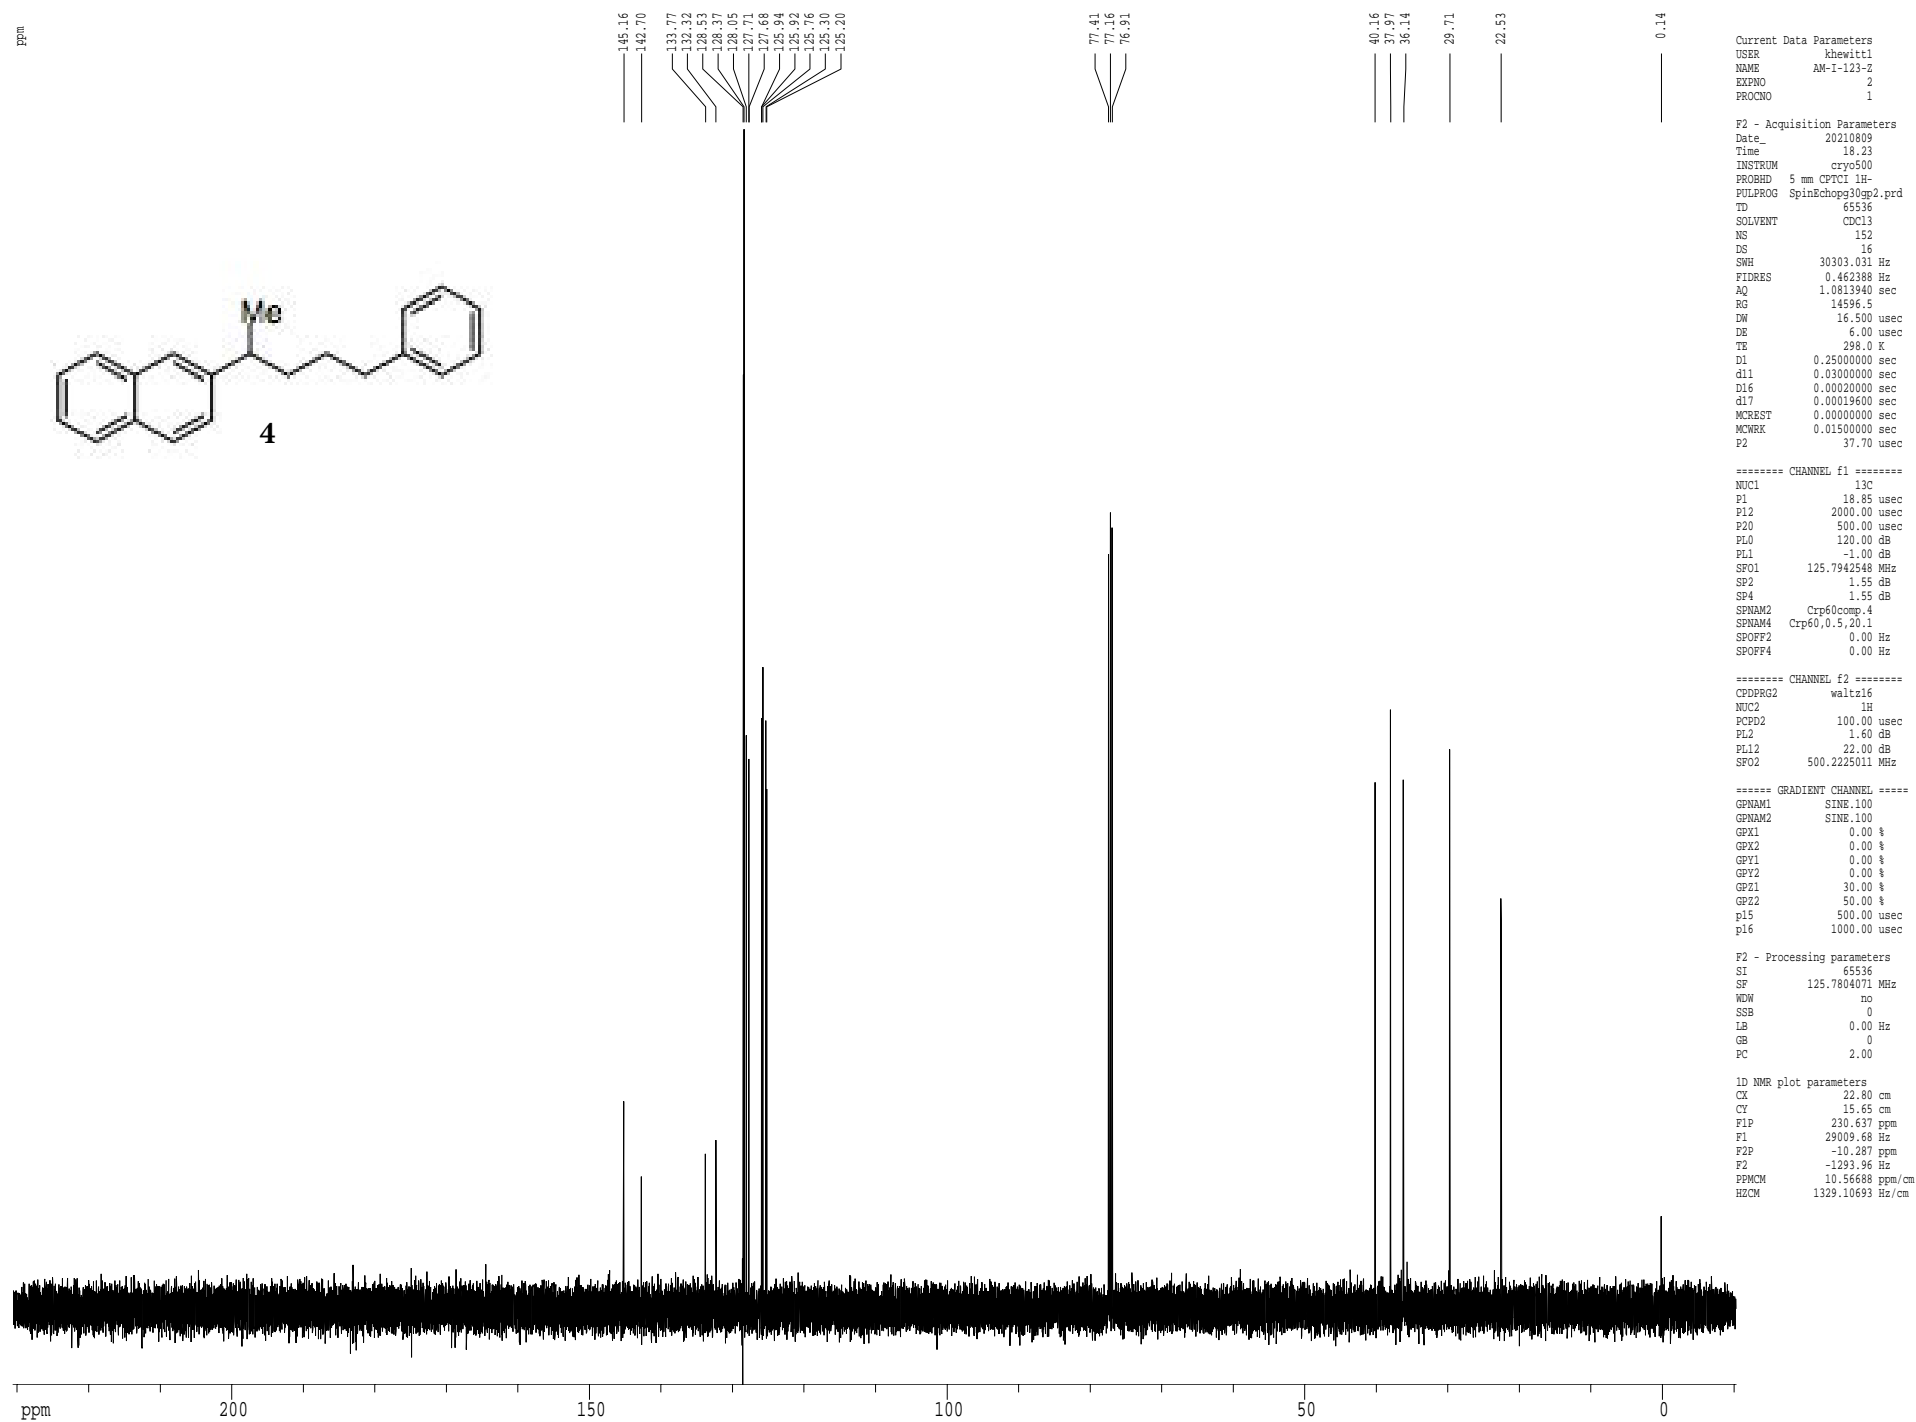

h

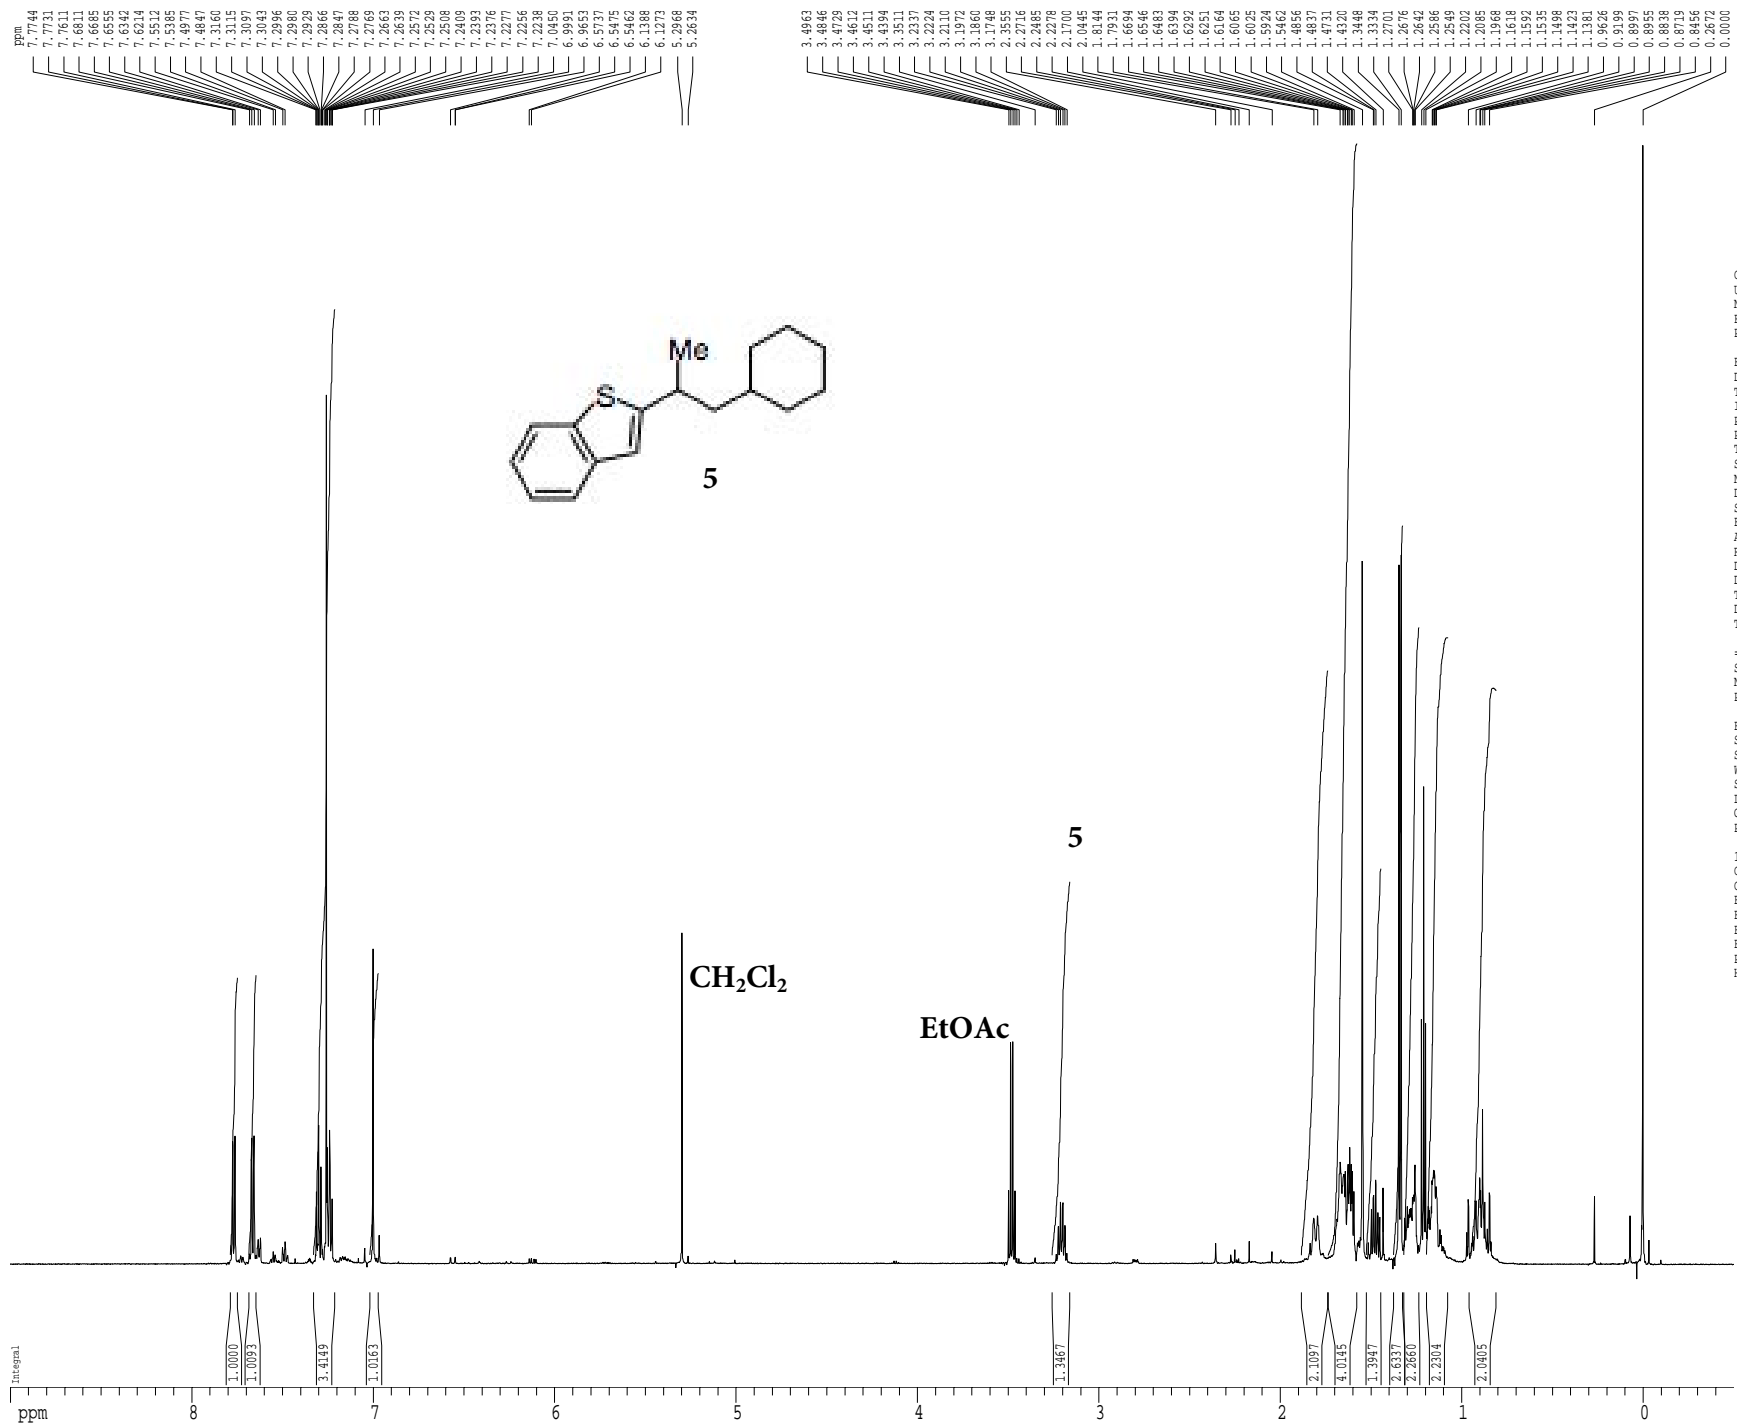

Current Data Parameters  
USER khewitt1  
NAME ACM-I-123-benzoCH  
EXPNO 31  
PROCNO 1

F2 - Acquisition Parameters  
Date\_ 20191115  
Time 18.27  
INSTRUM av600  
PROBHD 5 mm CPBBO BB-  
PULPROG zg30  
TD 980744  
SOLVENT CDCl3T  
NS 8  
DS 2  
SWH 9615.385 Hz  
FIDRES 0.098042 Hz  
AQ 5.0998979 sec  
RG 10  
DW 52.000 usec  
DE 13.70 usec  
TE 298.0 K  
D1 0.10000000 sec  
TD0 1

\*\*\*\*\* CHANNEL f1 \*\*\*\*\*  
SF01 600.1342009 MHz  
NUC1 1H  
P1 12.00 usec

F2 - Processing parameters  
SI 65536  
SF 600.1300376 MHz  
WDW EM  
SSB 0  
LB 0.30 Hz  
GB 0  
PC 1.00

1D NMR plot parameters  
CX 22.80 cm  
CY 15.00 cm  
F1P 9.000 ppm  
F1 5401.17 Hz  
F2P -0.500 ppm  
F2 -300.06 Hz  
PPMCM 0.41667 ppm/cm  
HZCM 250.05420 Hz/cm



# <sup>13</sup>C spectrum with <sup>1</sup>H decoupling

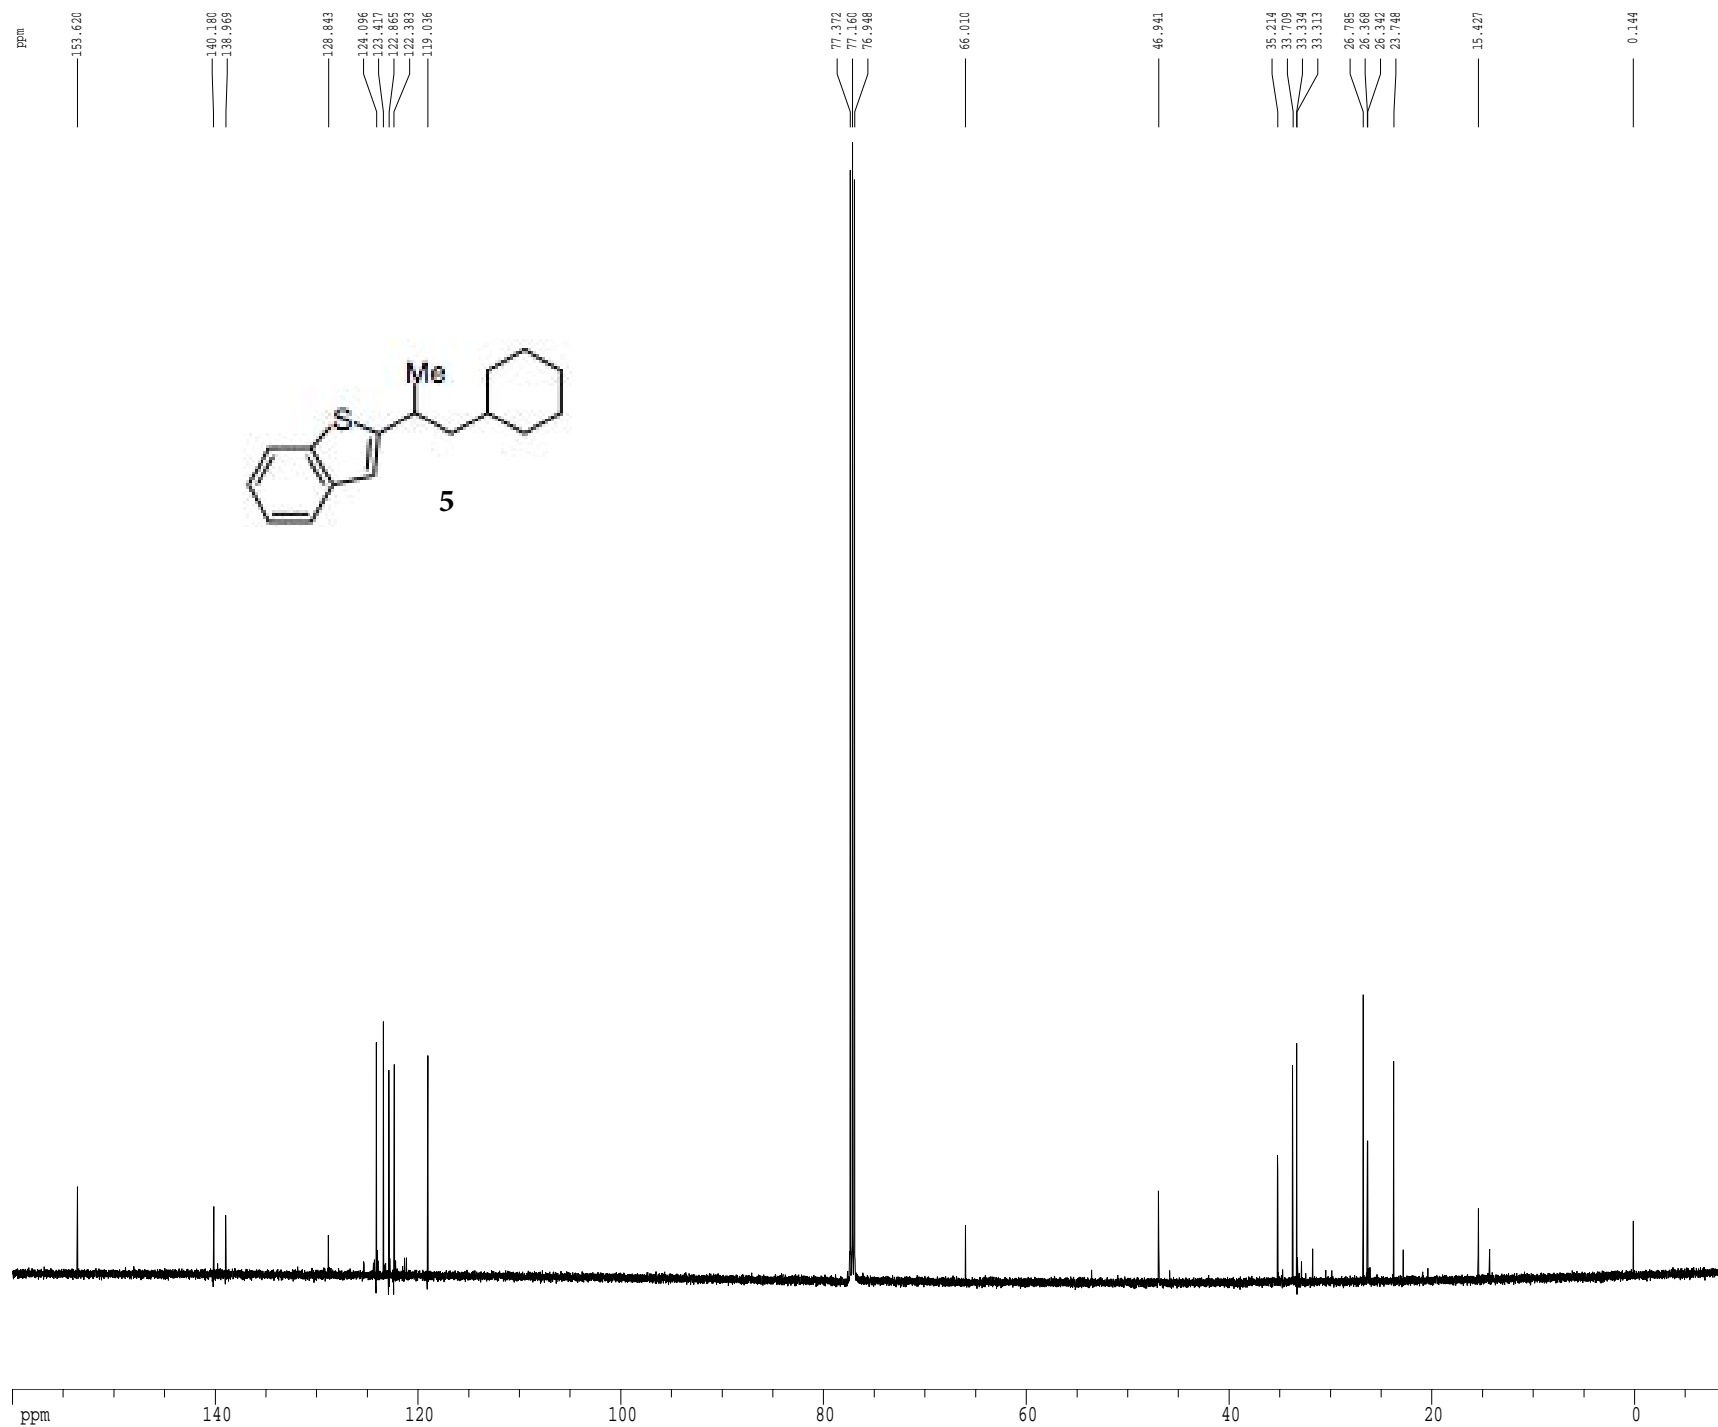

```

Current Data Parameters
USER          khewitt1
NAME          ACM-I-123-benzoCH
EXPNO         2
PROCNO        1

F2 - Acquisition Parameters
Date_         20191115
Time          18.30
INSTRUM       av600
PROBHD        5 mm CPBBO BB-
PULPROG       zgpg30
TD            65536
SOLVENT       CDCl3T
NS            447
DS            4
SWH           36231.883 Hz
FIDRES        0.552855 Hz
AQ            0.9044468 sec
RG            2050
DW            13.800 usec
DE            19.63 usec
TE            298.0 K
D1            0.40000001 sec
D11           0.03000000 sec
TD0           1

===== CHANNEL f1 =====
SF01          150.9194080 MHz
NUC1          13C
P1            10.10 usec

F2 - Processing parameters
SI            65536
SF            150.9027936 MHz
WDW           no
SSB           0
LB            0.00 Hz
GB            0
PC            1.00

1D NMR plot parameters
CX            22.80 cm
CY            15.00 cm
F1P           160.000 ppm
F1            24144.45 Hz
F2P           -10.000 ppm
F2            -1509.03 Hz
PPMCM         7.45614 ppm/cm
HZCM          1125.15234 Hz/cm
    
```

# <sup>1</sup>H spectrum

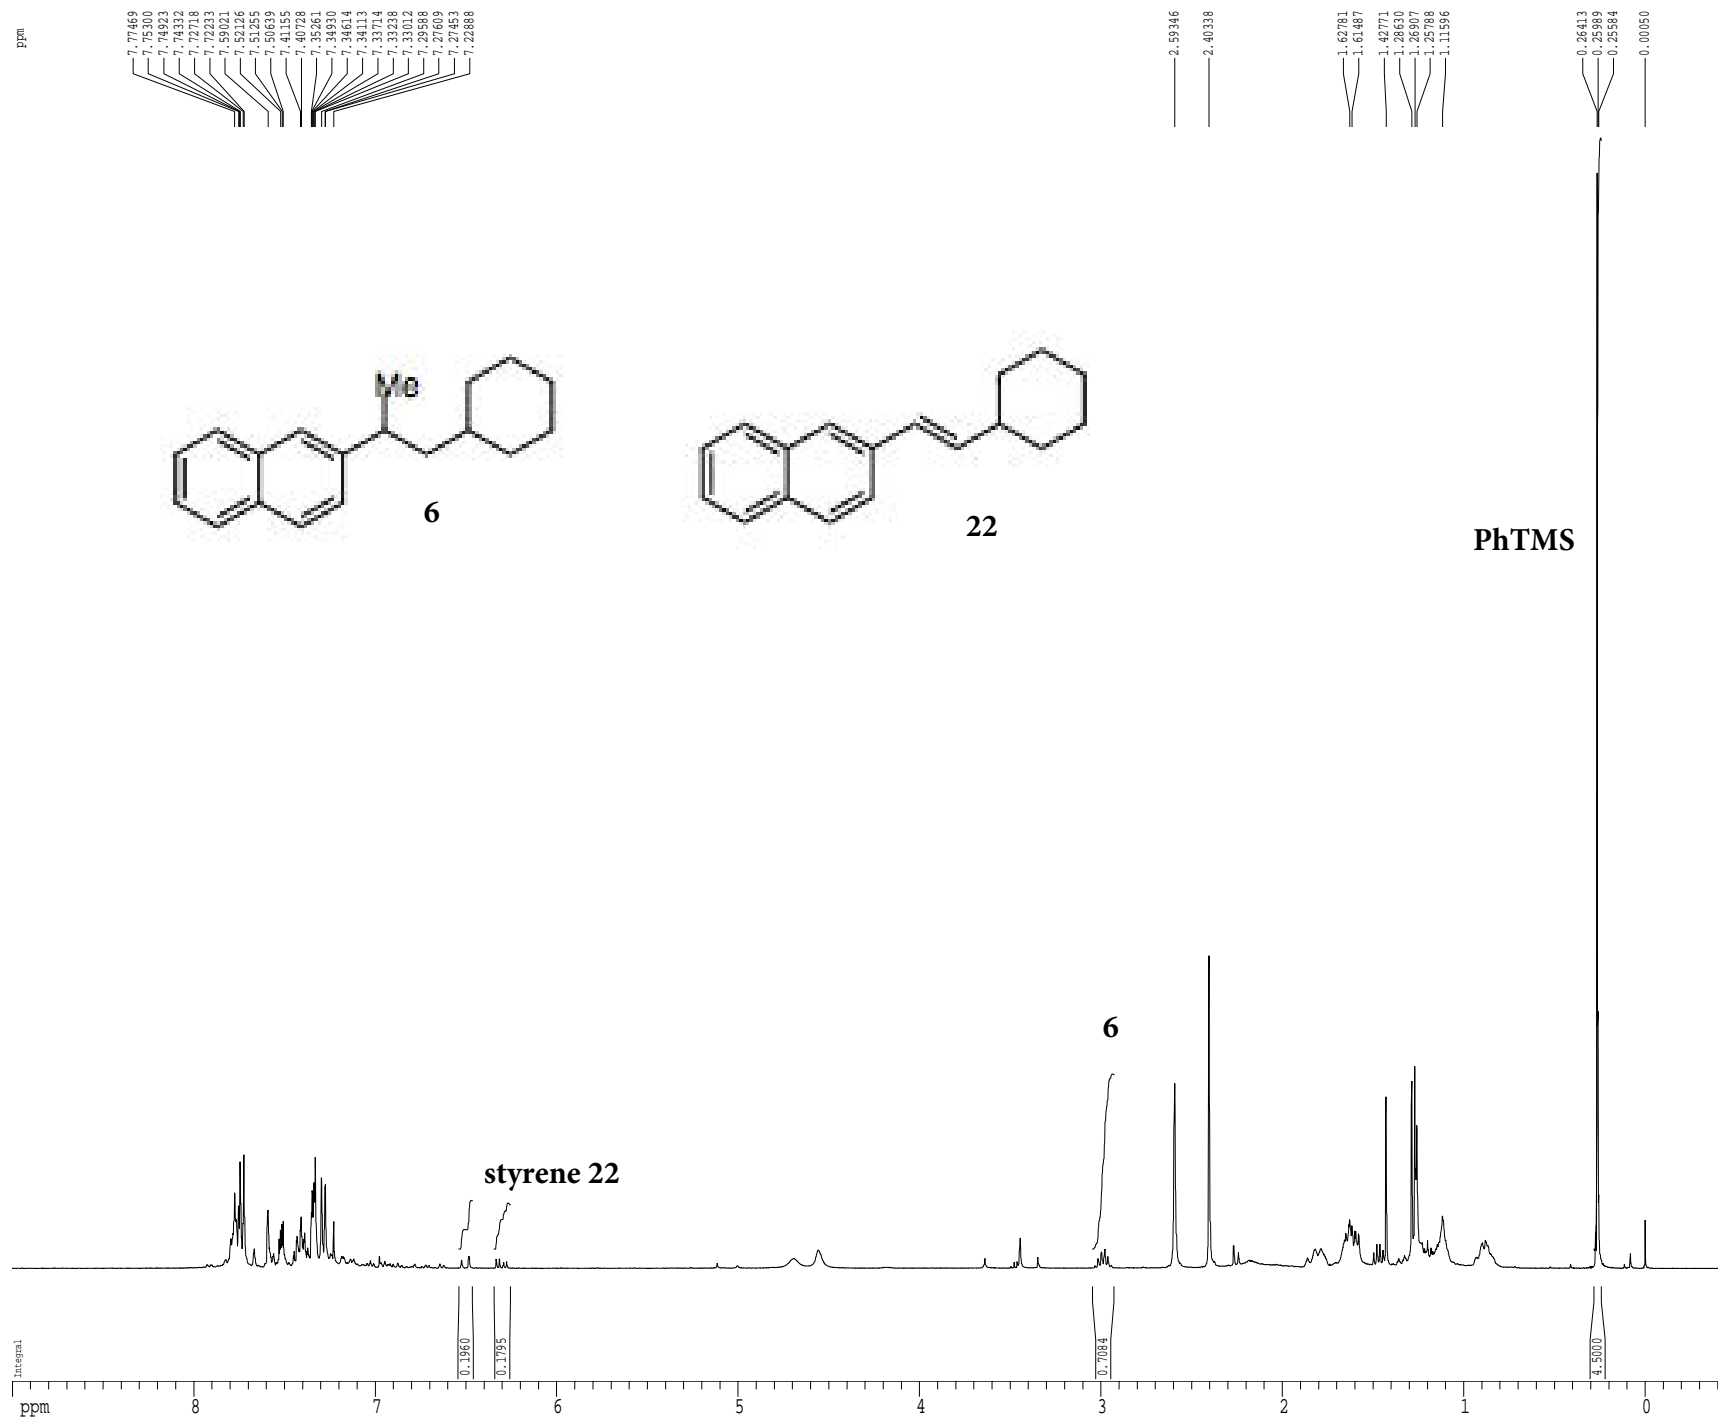

Current Data Parameters  
 USER khewitt1  
 NAME ACM-I-41  
 EXPNO 1  
 PROCNO 1

F2 - Acquisition Parameters  
 Date\_ 20190625  
 Time 14.48  
 INSTRUM drx400  
 PROBHD 5 mm QNP H/F/P  
 PULPROG zg30  
 TD 65536  
 SOLVENT CDC13T  
 NS 8  
 DS 2  
 SWH 6410.256 Hz  
 FIDRES 0.097813 Hz  
 AQ 5.1118579 sec  
 RG 71.8  
 DW 78.000 usec  
 DE 4.50 usec  
 TE 298.1 K  
 D1 0.10000000 sec  
 MCREST 0.00000000 sec  
 MCWREK 0.01500000 sec

===== CHANNEL f1 =====  
 NUC1 1H  
 P1 12.00 usec  
 PL1 -1.10 dB  
 SFO1 400.1328009 MHz

F2 - Processing parameters  
 SI 65536  
 SF 400.1300337 MHz  
 WDW no  
 SSB 0  
 LB 0.00 Hz  
 GB 0  
 PC 2.00

1D NMR plot parameters  
 CY 22.80 cm  
 CY 15.00 cm  
 F1P 9.000 ppm  
 F1 3601.17 Hz  
 F2P -0.500 ppm  
 F2 -200.06 Hz  
 PPMCM 0.41667 ppm/cm  
 HZCM 166.72086 Hz/cm

# <sup>1</sup>H spectrum

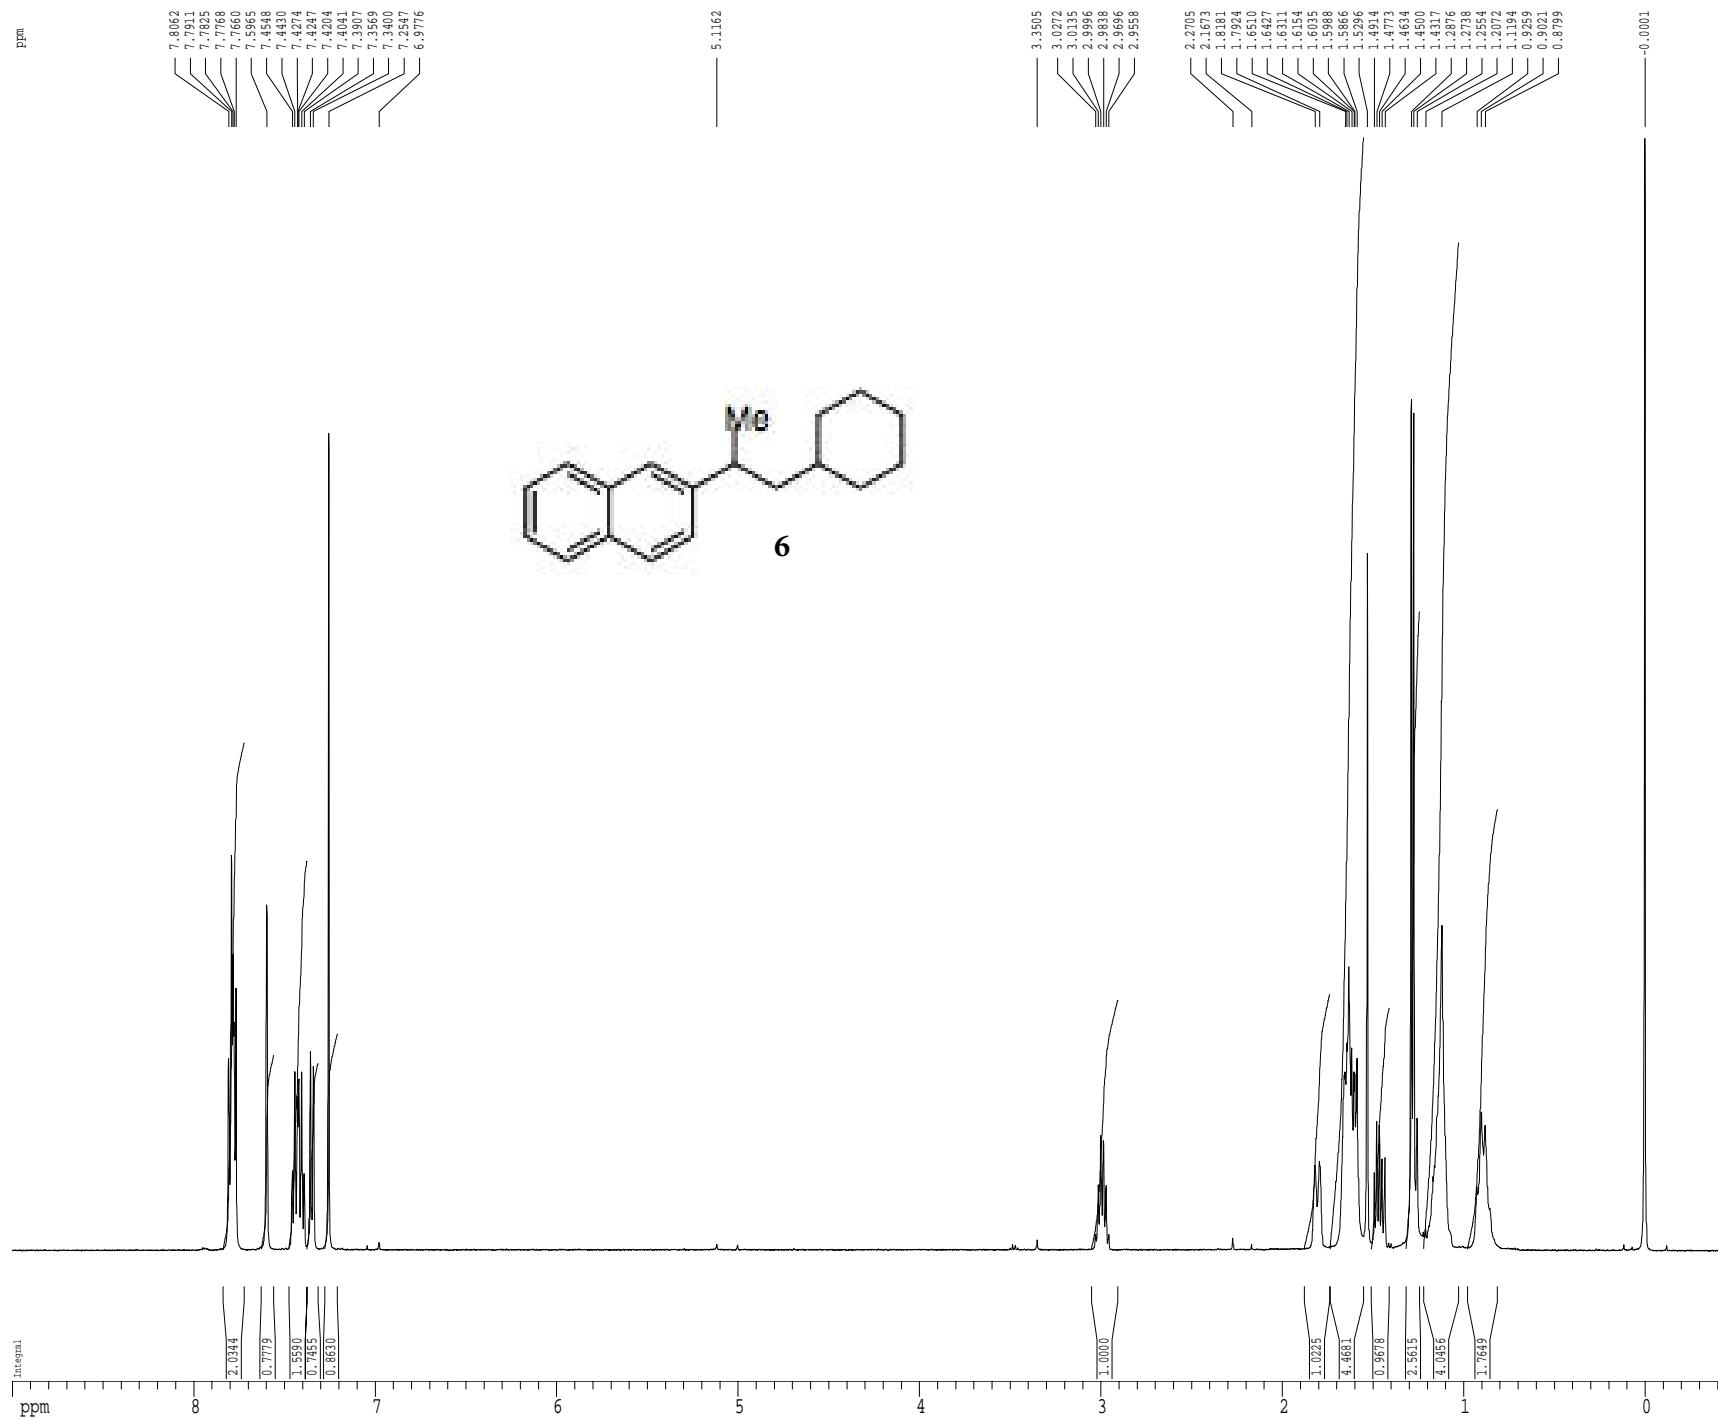

```

Current Data Parameters
USER      khewitt1
NAME      ACM-I-126ch
EXPNO     1
PROCNO    1

F2 - Acquisition Parameters
Date_     20191115
Time      18.14
INSTRUM    cryo500
PROBHD     5 mm CPTCI 1H-
PULPROG    zg30
TD          81728
SOLVENT    CDCl3T
NS          10
DS          2
SWH         8012.820 Hz
FIDRES      0.098043 Hz
AQ          5.0998774 sec
RG          4.5
DW          62.400 usec
DE          6.00 usec
TE          298.2 K
D1          0.10000000 sec
MCREST      0.00000000 sec
MCWREK      0.01500000 sec

===== CHANNEL f1 =====
NUC1        1H
P1          7.50 usec
PL1         1.60 dB
SFO1        500.2235015 MHz

F2 - Processing parameters
SI          65536
SF          500.2200341 MHz
WDW         EM
SSB         0
LB          0.30 Hz
GB          0
PC          1.00

1D NMR plot parameters
CY          22.80 cm
CY          15.00 cm
F1P         9.000 ppm
F1          4501.98 Hz
F2P         -0.500 ppm
F2          -250.11 Hz
PPMCM       0.41667 ppm/cm
HZCM        208.42502 Hz/cm
    
```

# Z-restored spin-echo 13C spectrum with 1H decoupling

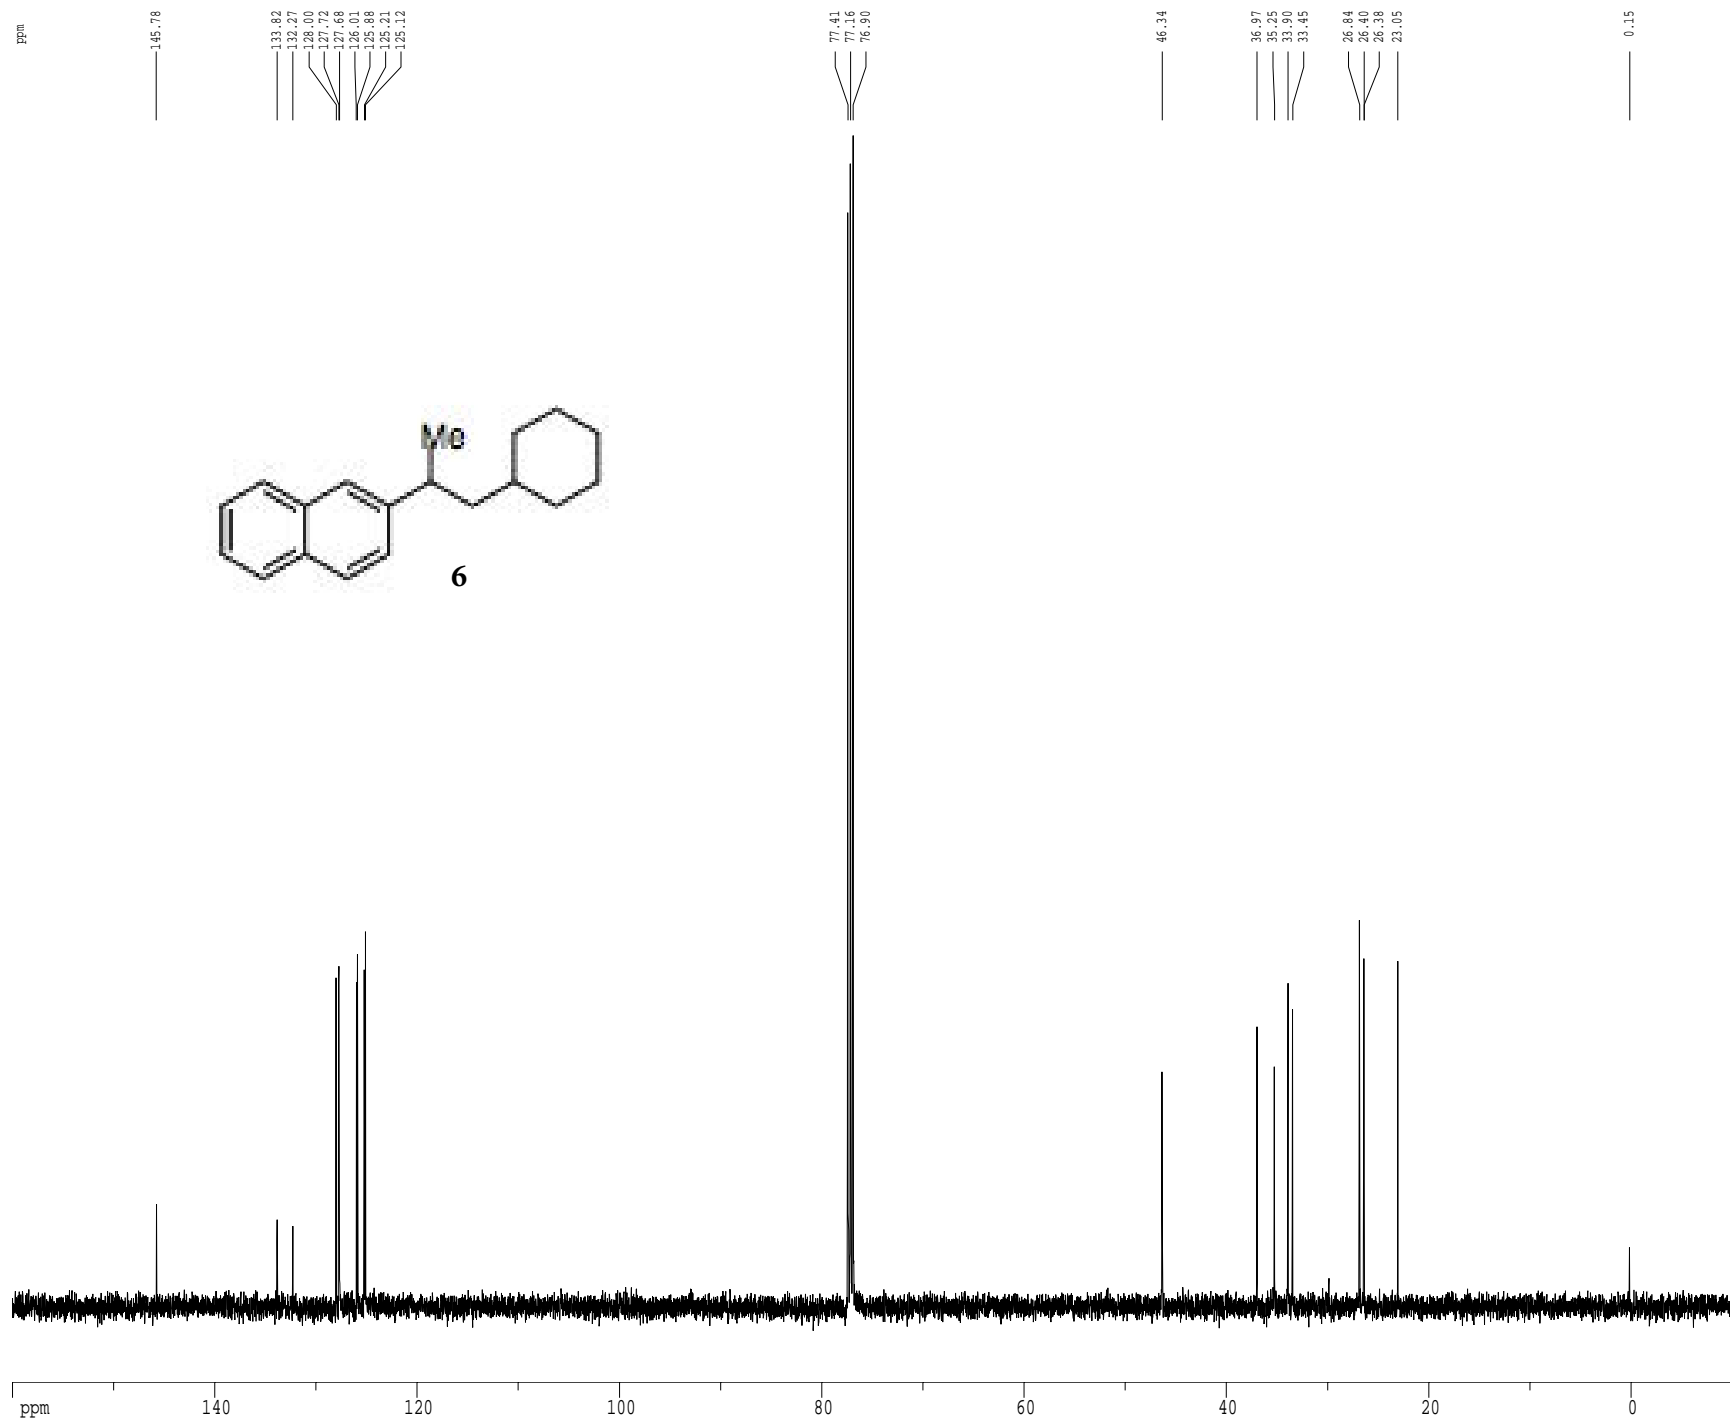

```

Current Data Parameters
USER      khewitt1
NAME      ACM-I-126ch
EXPNO     2
PROCNO    1

F2 - Acquisition Parameters
Date_     20191115
Time      18.29
INSTRUM   cryo500
PROBHD    5 mm CPTCI 1H-
PULPROG   SpinEchopg30gp2.prd
TD         65536
SOLVENT   CDCl3
NS         616
DS         16
SWH        30303.031 Hz
FIDRES     0.462388 Hz
AQ         1.0813940 sec
RG         7298.2
DM         16.500 usec
DE         6.00 usec
TE         298.2 K
D1         0.25000000 sec
d11        0.03000000 sec
d16        0.00020000 sec
d17        0.00019600 sec
MCKREST    0.00000000 sec
MCKWIX     0.01500000 sec
P2         33.10 usec

===== CHANNEL f1 =====
NUC1       13C
P1         16.55 usec
P12        2000.00 usec
P20        500.00 usec
PL0        120.00 dB
PL1        -1.00 dB
SP01       125.7942548 MHz
SP2        2.70 dB
SP4        2.70 dB
SPNAM2     Crp60comp.4
SPNAM4     Crp60,0.5,20.1
SPOFF2     0.00 Hz
SPOFF4     0.00 Hz

===== CHANNEL f2 =====
CPDPRG2    waltz16
NUC2       1H
PCPD2      100.00 usec
PL2        1.60 dB
PL12       23.54 dB
SFO2       500.2225011 MHz

===== GRADIENT CHANNEL =====
GPNAM1     SINE.100
GPNAM2     SINE.100
GPX1       0.00 %
GPX2       0.00 %
GPY1       0.00 %
GPY2       0.00 %
GPZ1       30.00 %
GPZ2       50.00 %
p15        500.00 usec
p16        1000.00 usec

F2 - Processing parameters
SI         65536
SF         125.7804062 MHz
WDW        EM
SSB        0
LB         1.00 Hz
GB         0
PC         2.00

1D NMR plot parameters
CX         22.80 cm
CY         15.65 cm
F1P        160.000 ppm
F1         20124.87 Hz
F2P        -10.358 ppm
F2         -1302.84 Hz
PPMCM      7.47185 ppm/cm
HZCM       939.81177 Hz/cm
    
```

# <sup>1</sup>H spectrum

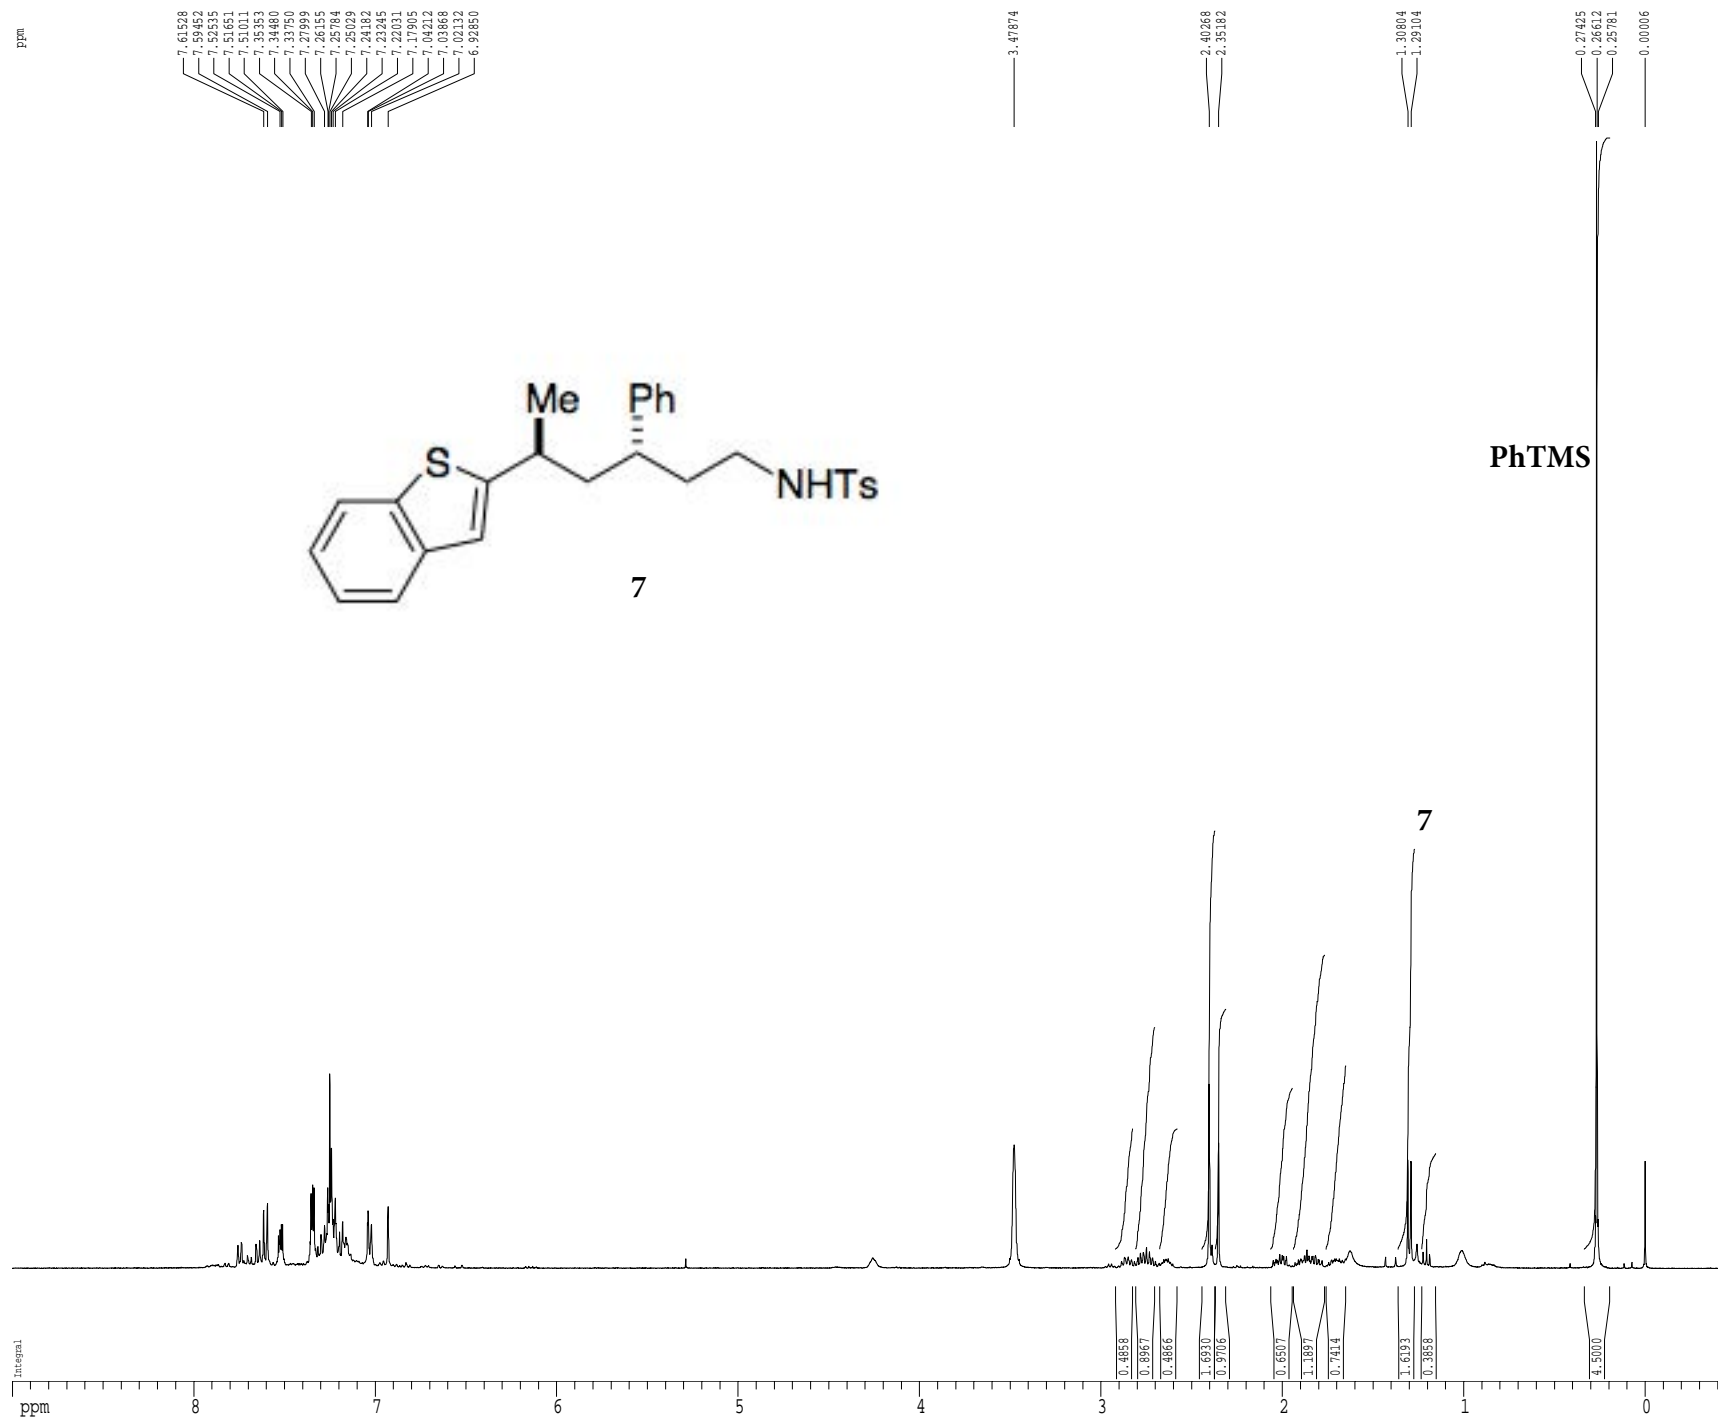

Current Data Parameters  
 USER khewitt1  
 NAME KAH-I-222  
 EXPNO 1  
 PROCNO 1

F2 - Acquisition Parameters  
 Date\_ 20181208  
 Time 14.51  
 INSTRUM drx400  
 PROBHD 5 mm QNP H/F/P  
 PULPROG zg30  
 TD 38460  
 SOLVENT CDCl3  
 NS 8  
 DS 2  
 SWH 6410.256 Hz  
 FIDRES 0.166673 Hz  
 AQ 2.9999299 sec  
 RG 181  
 DW 78.000 usec  
 DE 4.50 usec  
 TE 298.0 K  
 D1 0.10000000 sec  
 MCREST 0.00000000 sec  
 MCWREK 0.01500000 sec

===== CHANNEL f1 =====  
 NUC1 1H  
 P1 12.00 usec  
 PL1 -1.10 dB  
 SFO1 400.1328009 MHz

F2 - Processing parameters  
 SI 65536  
 SF 400.1300249 MHz  
 WDW no  
 SSB 0  
 LB 0.00 Hz  
 GB 0  
 PC 2.00

1D NMR plot parameters  
 CY 22.80 cm  
 CY 15.00 cm  
 F1P 9.000 ppm  
 F1 3601.17 Hz  
 F2P -0.500 ppm  
 F2 -200.06 Hz  
 PPMCM 0.41667 ppm/cm  
 HZCM 166.72086 Hz/cm

# <sup>1</sup>H spectrum

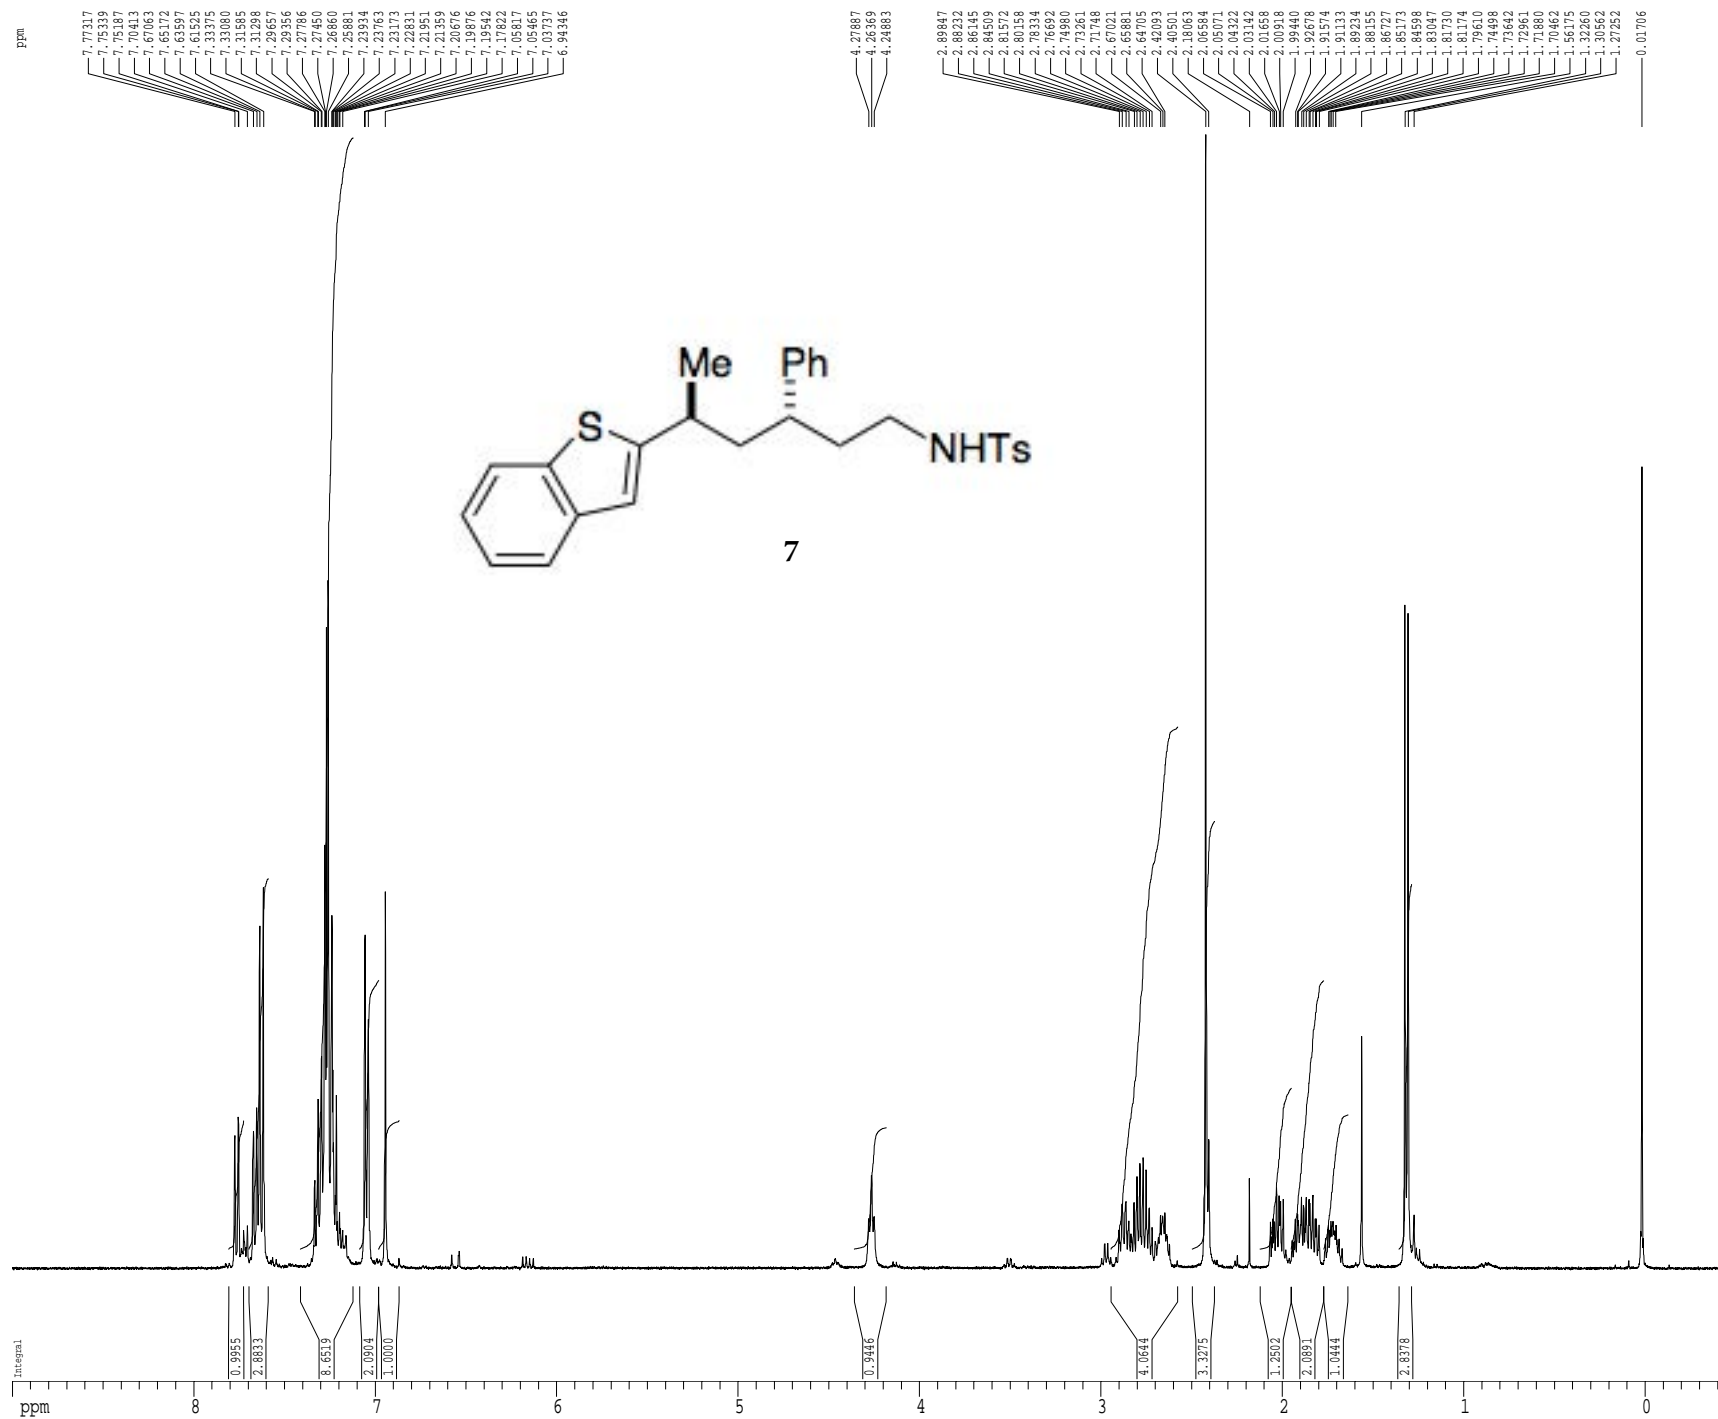

Current Data Parameters

USER khewitt1  
NAME KAH-1-222-2  
EXPNO 1  
PROCNO 1

F2 - Acquisition Parameters

Date\_ 20190329  
Time 15.37  
INSTRUM drx400  
PROBHD 5 mm QNP H/F/P  
PULPROG zg30  
TD 38460  
SOLVENT CDC13T  
NS 8  
DS 2  
SWH 6410.256 Hz  
FIDRES 0.166673 Hz  
AQ 2.9999299 sec  
RG 287.4  
DW 78.000 usec  
DE 4.50 usec  
TE 298.1 K  
D1 0.10000000 sec  
MCREST 0.00000000 sec  
MCWREK 0.01500000 sec

===== CHANNEL f1 =====

NUC1 1H  
P1 12.00 usec  
PL1 -1.10 dB  
SFO1 400.1328009 MHz

F2 - Processing parameters

SI 65536  
SF 400.1300175 MHz  
WDW no  
SSB 0  
LB 0.00 Hz  
GB 0  
PC 2.00

1D NMR plot parameters

CY 22.80 cm  
CY 15.00 cm  
F1P 9.000 ppm  
F1 3601.17 Hz  
F2P -0.500 ppm  
F2 -200.06 Hz  
PPMCM 0.41667 ppm/cm  
HZCM 166.72084 Hz/cm

c13.c

ppm

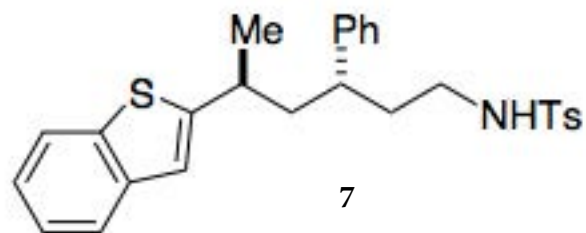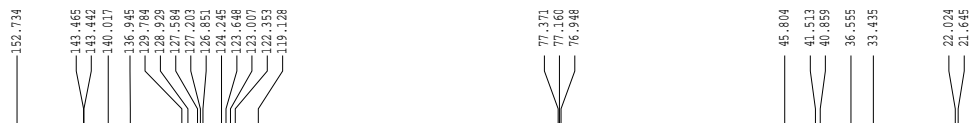

Current Data Parameters  
 USER khewitt1  
 NAME KAH-I-222-Z-C  
 EXPNO 1  
 PROCNO 1

F2 - Acquisition Parameters  
 Date\_ 20210713  
 Time 14.14  
 INSTRUM av600  
 PROBHD 5 mm CPBBO BB-  
 PULPROG zgpg30  
 TD 65536  
 SOLVENT CDCl3T  
 NS 146  
 DS 4  
 SWH 36231.883 Hz  
 FIDRES 0.552855 Hz  
 AQ 0.9044468 sec  
 RG 2050  
 DW 13.800 usec  
 DE 19.63 usec  
 TE 298.0 K  
 D1 0.40000001 sec  
 D11 0.03000000 sec  
 TD0 1

===== CHANNEL f1 =====  
 SF01 150.9194080 MHz  
 NUC1 13C  
 P1 10.10 usec

F2 - Processing parameters  
 SI 65536  
 SF 150.9027958 MHz  
 WDW no  
 SSB 0  
 LB 0.00 Hz  
 GB 0  
 PC 1.00

1D NMR plot parameters  
 CX 22.80 cm  
 CY 15.00 cm  
 FLP 230.136 ppm  
 F1 34728.11 Hz  
 F2P -9.965 ppm  
 F2 -1503.78 Hz  
 PPMCM 10.53074 ppm/cm  
 HZCM 1589.11780 Hz/cm

ppm

200

150

100

50

0

# <sup>1</sup>H spectrum

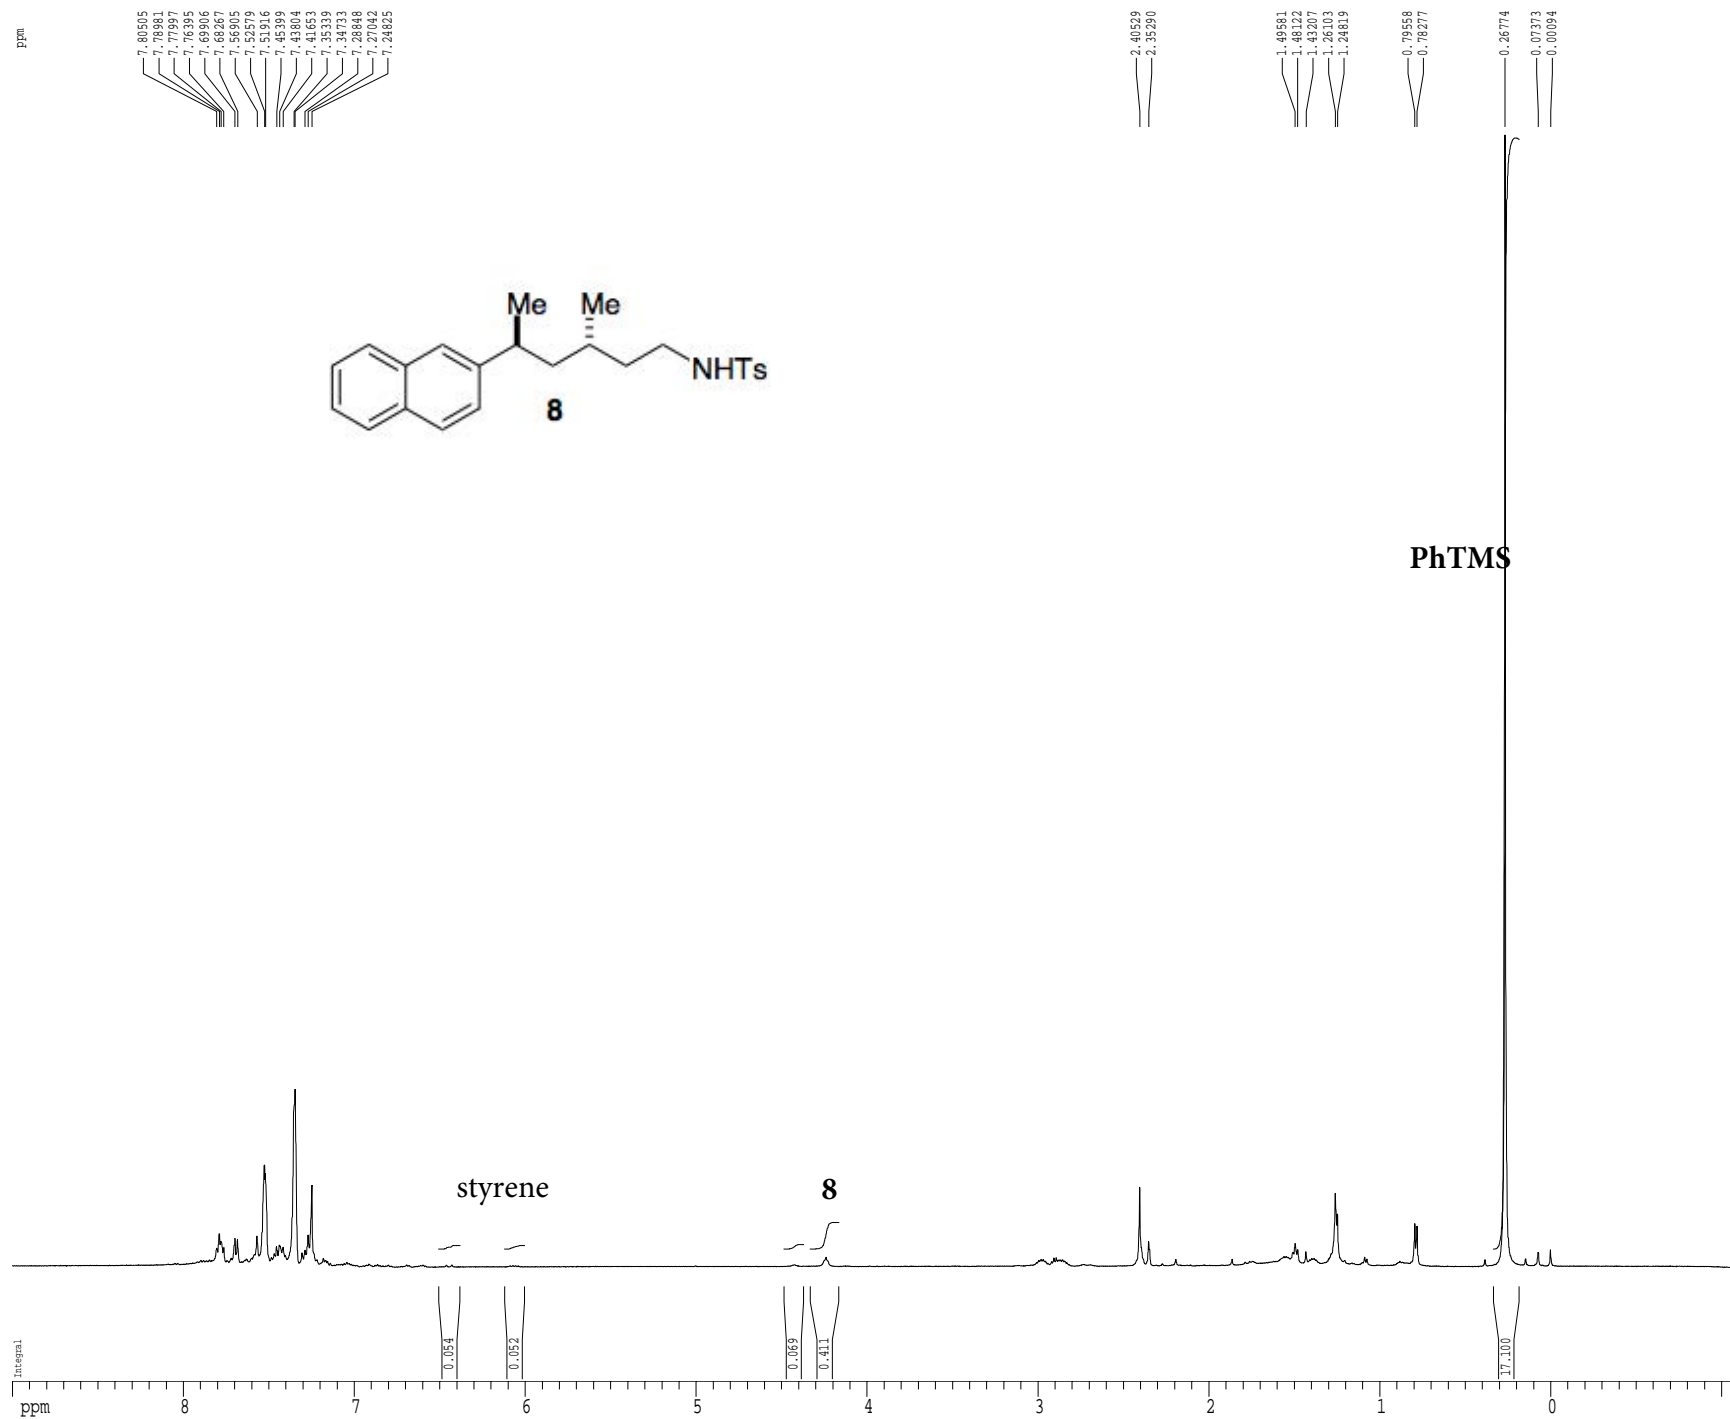

Current Data Parameters  
 USER caherber  
 NAME CAH-I-247-Crude  
 EXPNO 1  
 PROCNO 1

F2 - Acquisition Parameters  
 Date\_ 20210710  
 Time 11.36  
 INSTRUM cryo500  
 PROBHD 5 mm CPTCI 1H-  
 PULPROG zg30  
 TD 81728  
 SOLVENT CDCl3  
 NS 8  
 DS 2  
 SWH 8012.820 Hz  
 FIDRES 0.098043 Hz  
 AQ 5.0998774 sec  
 RG 6.3  
 DW 62.400 usec  
 DE 6.00 usec  
 TE 298.0 K  
 D1 0.10000000 sec  
 MCREST 0.00000000 sec  
 MCWREK 0.01500000 sec

===== CHANNEL f1 =====  
 NUC1 1H  
 P1 9.75 usec  
 PL1 1.60 dB  
 SFO1 500.2235015 MHz

F2 - Processing parameters  
 SI 65536  
 SF 500.2200370 MHz  
 WDW no  
 SSB 0  
 LB 0.00 Hz  
 GB 0  
 PC 1.00

1D NMR plot parameters  
 CX 22.80 cm  
 CY 15.00 cm  
 F1P 9.000 ppm  
 F1 4501.98 Hz  
 F2P -1.083 ppm  
 F2 -541.88 Hz  
 PPMCM 0.44225 ppm/cm  
 HZCM 221.22217 Hz/cm



# <sup>1</sup>H spectrum

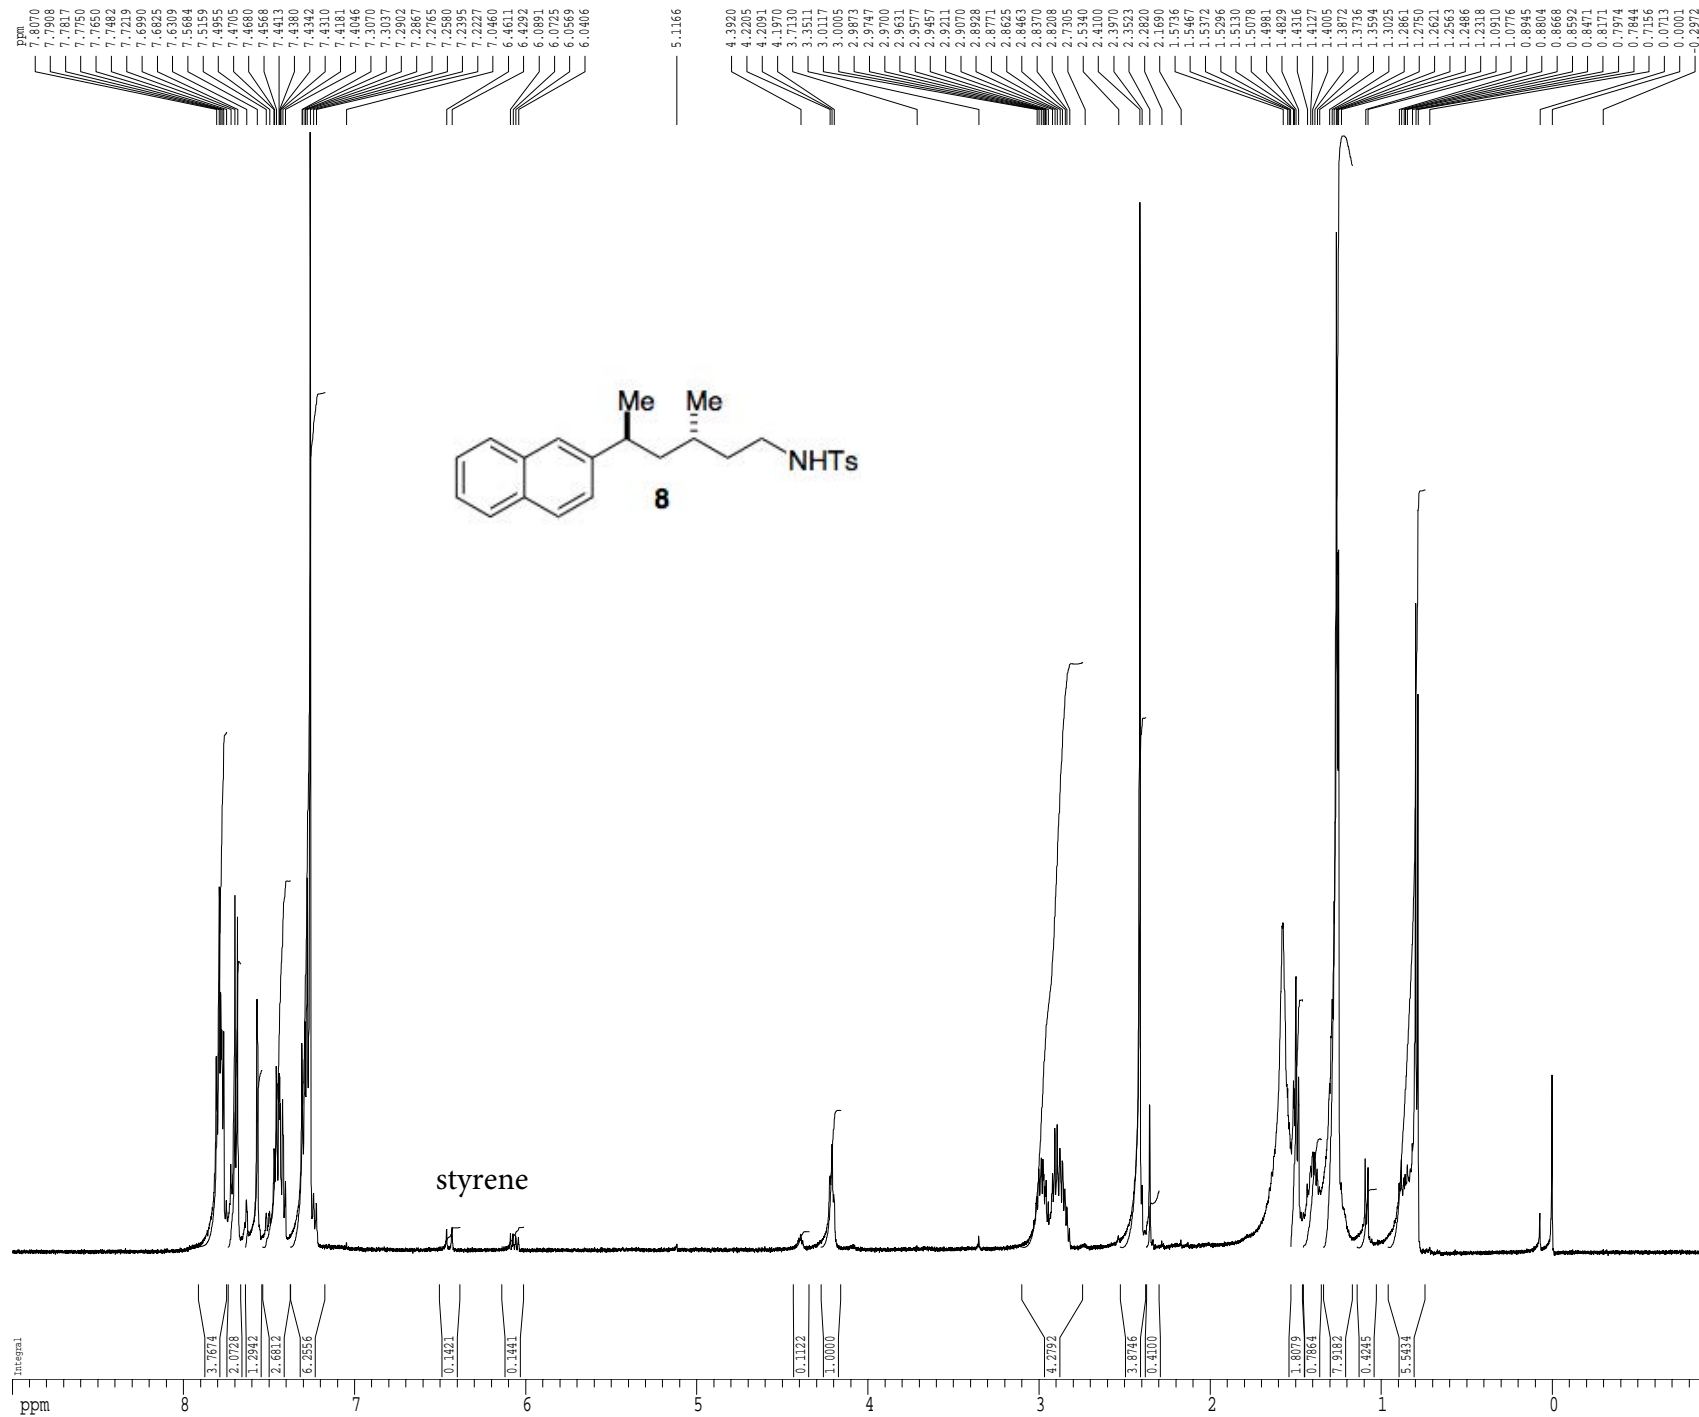

Current Data Parameters  
 USER caherber  
 NAME CAH-I-247-Full  
 EXPNO 1  
 PROCNO 1

F2 - Acquisition Parameters  
 Date\_ 20210713  
 Time 9.25  
 INSTRUM cryo500  
 PROBHD 5 mm CPTCI 1H-  
 PULPROG zg30  
 TD 81728  
 SOLVENT CDCl3  
 NS 8  
 DS 2  
 SWH 8012.820 Hz  
 FIDRES 0.098043 Hz  
 AQ 5.0998774 sec  
 RG 6.3  
 DW 62.400 usec  
 DE 6.00 usec  
 TE 298.0 K  
 D1 0.10000000 sec  
 MCREST 0.00000000 sec  
 MCWRR 0.01500000 sec

===== CHANNEL f1 =====  
 NUC1 1H  
 P1 9.75 usec  
 PL1 1.60 dB  
 SFO1 500.2235015 MHz

F2 - Processing parameters  
 SI 65536  
 SF 500.2200315 MHz  
 WDW no  
 SSB 0  
 LB 0.00 Hz  
 GB 0  
 PC 1.00

1D NMR plot parameters  
 CY 22.80 cm  
 CY 15.00 cm  
 F1P 9.000 ppm  
 F1 4501.98 Hz  
 F2P -1.072 ppm  
 F2 -536.38 Hz  
 PPMCM 0.44177 ppm/cm  
 HZCM 220.98083 Hz/cm

Z-restored spin-echo 13C spectrum with 1H decoupling

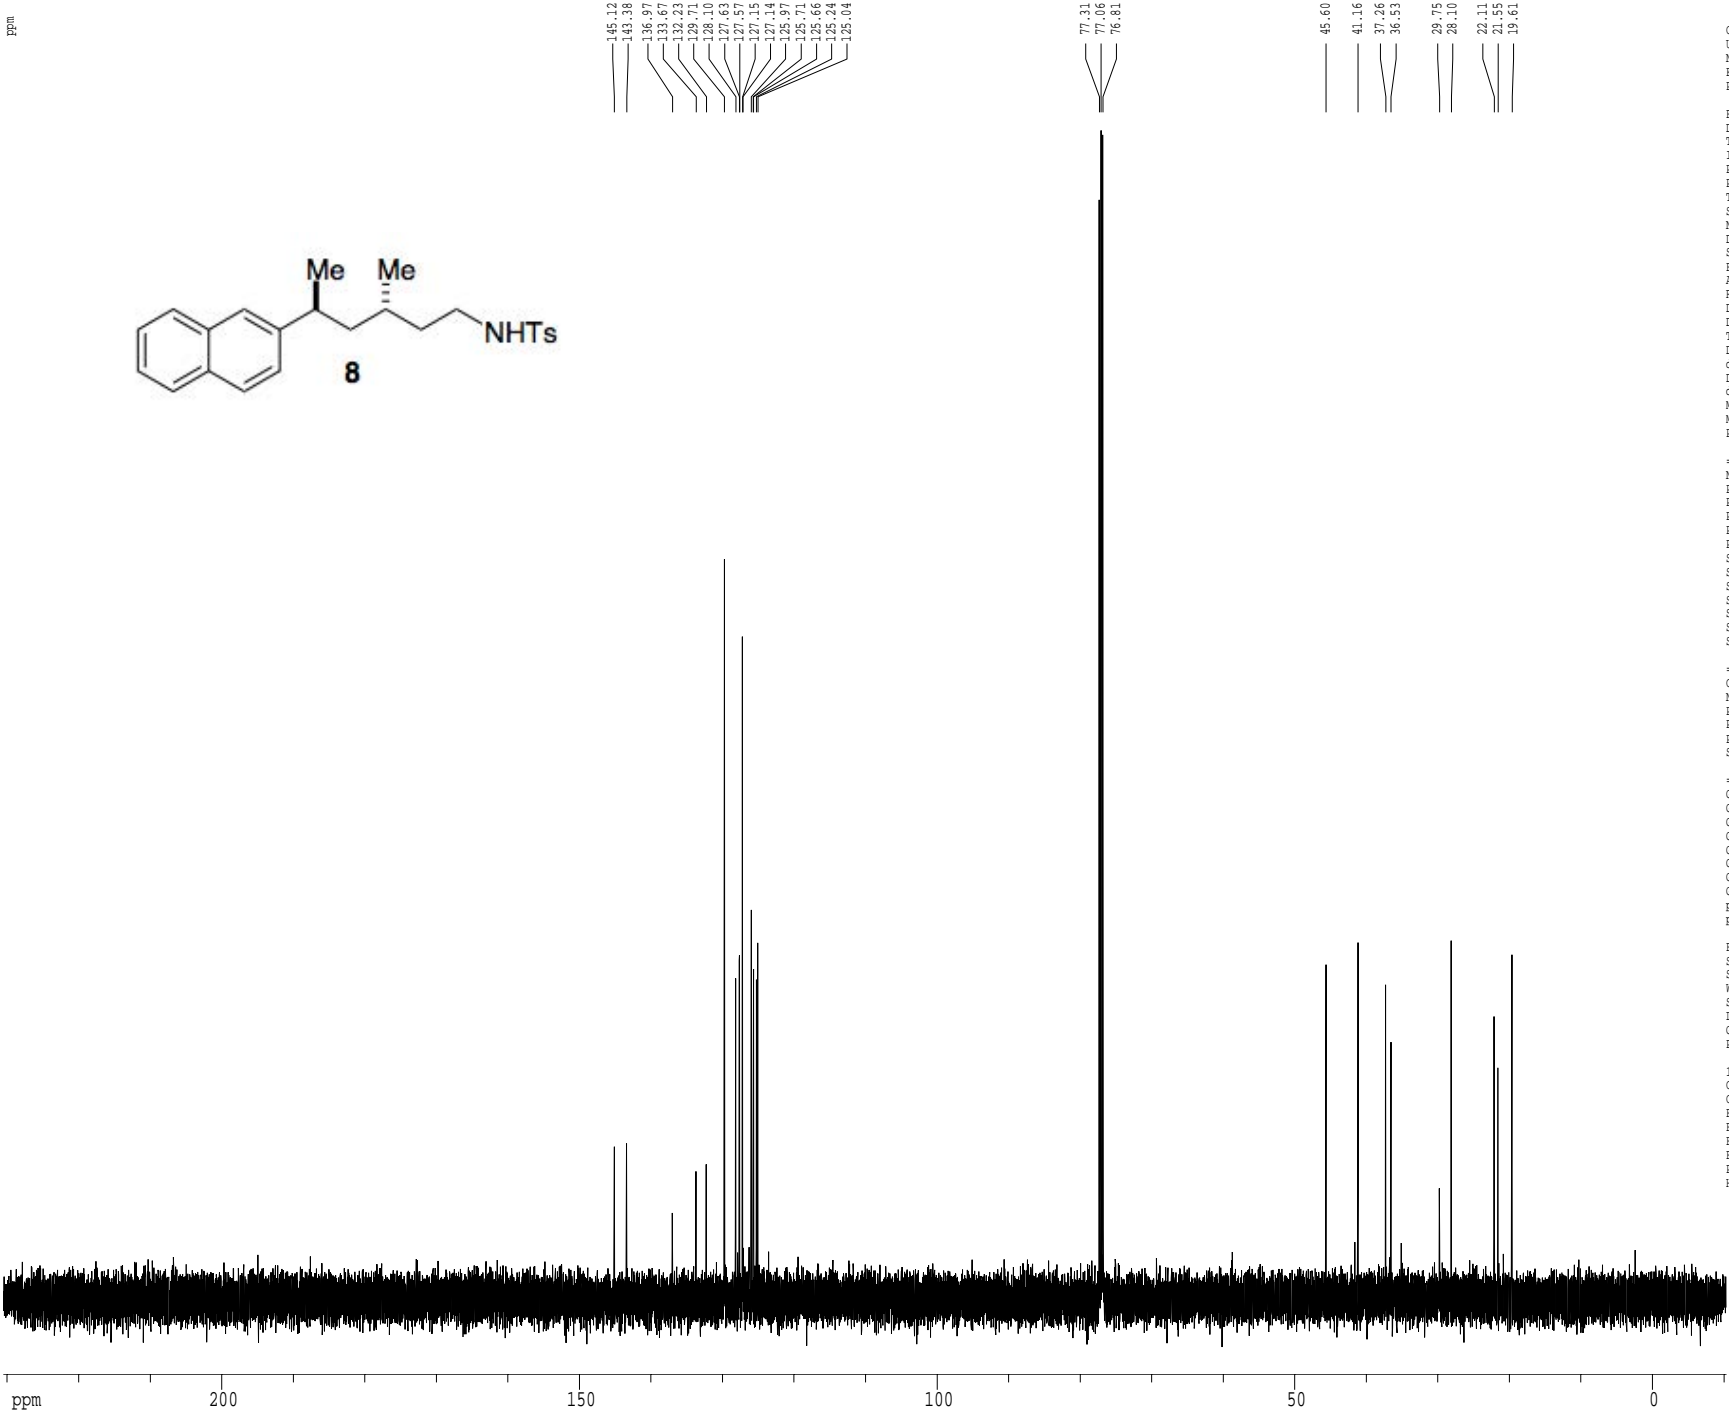

Current Data Parameters

USER caherber  
NAME CAH-I-247-full  
EXPNO 2  
PROCNO 1

F2 - Acquisition Parameters

Date\_ 20210713  
Time 9.36  
INSTRUM cryo500  
PROBHD 5 mm CPTCI 1H-  
PULPROG SpinEchopg30gp2.prd  
TD 65536  
SOLVENT CDCl3  
NS 512  
DS 16  
SWH 30303.031 Hz  
FIDRES 0.462388 Hz  
AQ 1.0813940 sec  
RG 7298.2  
DM 16.500 usec  
DE 6.00 usec  
TE 298.0 K  
D1 0.25000000 sec  
d11 0.03000000 sec  
D16 0.00020000 sec  
d17 0.00019600 sec  
MCREST 0.00000000 sec  
MCWIX 0.01500000 sec  
P2 37.70 usec

===== CHANNEL f1 =====

NUC1 13C  
P1 18.85 usec  
P12 2000.00 usec  
P20 500.00 usec  
PL0 120.00 dB  
PL1 -1.00 dB  
SFO1 125.7942548 MHz  
SP2 1.55 dB  
SP4 1.55 dB  
SPNAM2 Crp60comp.4  
SPNAM4 Crp60,0.5,20.1  
SPOFF2 0.00 Hz  
SPOFF4 0.00 Hz

===== CHANNEL f2 =====

CPDPRG2 waltz16  
NUC2 1H  
PCPD2 100.00 usec  
PL2 1.60 dB  
PL12 22.00 dB  
SFO2 500.2225011 MHz

===== GRADIENT CHANNEL =====

GPAM1 SINE.100  
GPAM2 SINE.100  
GPX1 0.00 %  
GPX2 0.00 %  
GPY1 0.00 %  
GPY2 0.00 %  
GPZ1 30.00 %  
GPZ2 50.00 %  
p15 500.00 usec  
p16 1000.00 usec

F2 - Processing parameters

SI 65536  
SF 125.7804190 MHz  
WDW no  
SSB 0  
LB 0.00 Hz  
GB 0  
PC 2.00

1D NMR plot parameters

CX 22.80 cm  
CY 15.65 cm  
F1P 230.637 ppm  
F1 29009.68 Hz  
F2P -10.287 ppm  
F2 -1293.96 Hz  
PPMCM 10.56688 ppm/cm  
HZCM 1329.10706 Hz/cm

# <sup>1</sup>H spectrum

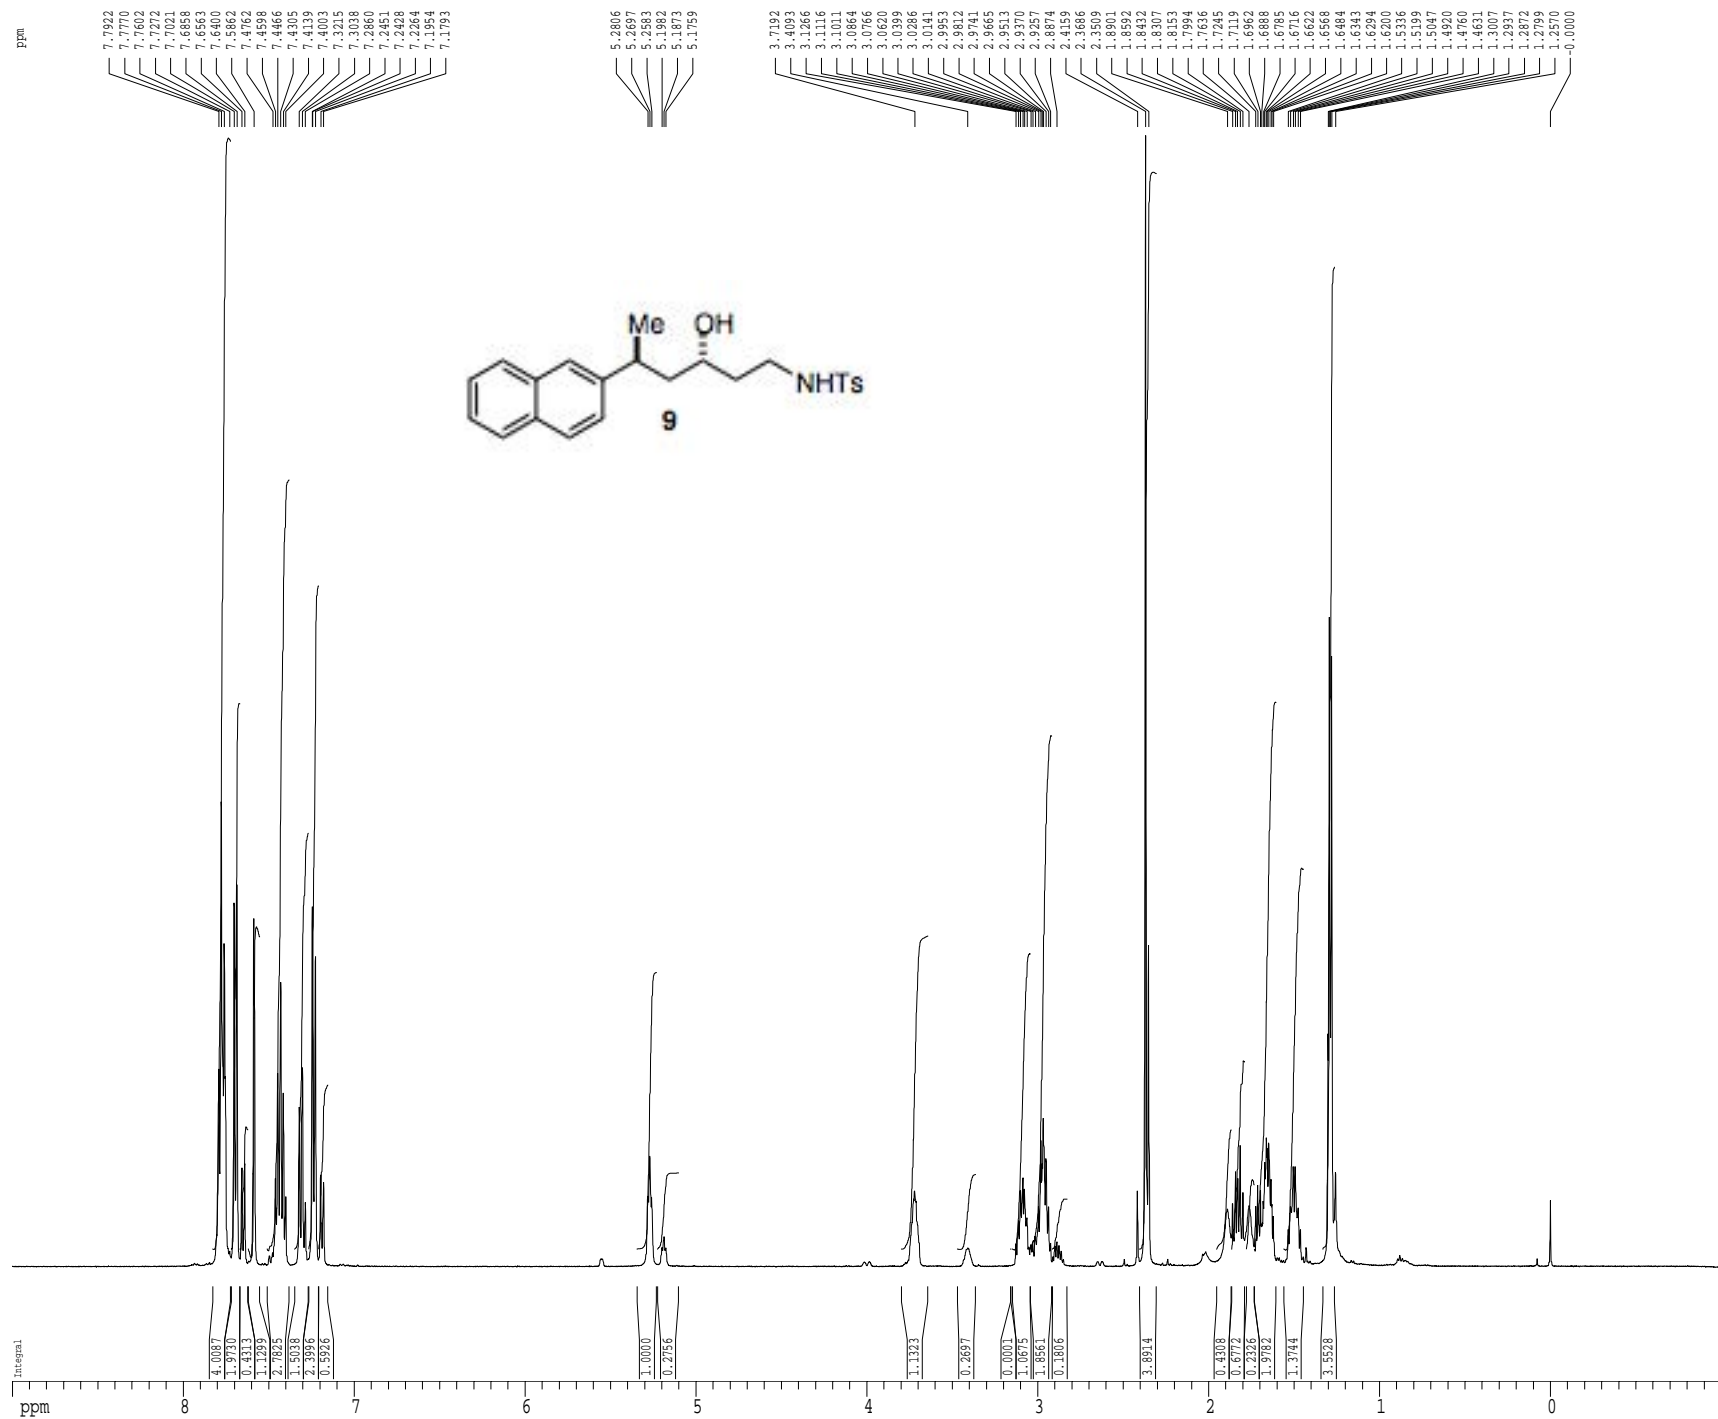

```

Current Data Parameters
USER          caherba
NAME          CAH-I-239-full
EXPNO        1
PROCNO       1

F2 - Acquisition Parameters
Date_        20210623
Time         11.35
INSTRUM      cryo500
PROBHD       5 mm CPTCI 1H-
PULPROG      zg30
TD           81728
SOLVENT      CDCl3
NS           8
DS           2
SWH          8012.820 Hz
FIDRES       0.098043 Hz
AQ           5.0998774 sec
RG           5
DW           62.400 usec
DE           6.00 usec
TE           298.0 K
D1           0.10000000 sec
MCREST       0.00000000 sec
MCNRC        0.01500000 sec

===== CHANNEL f1 =====
NUC1          1H
P1           9.75 usec
PL1          1.60 dB
SFO1         500.2235015 MHz

F2 - Processing parameters
SI           65536
SF           500.2200379 MHz
WDW          no
SSB          0
LB           0.00 Hz
GB           0
PC           1.00

1D NMR plot parameters
CY           22.80 cm
CY           15.00 cm
F1P          9.000 ppm
F1           4501.98 Hz
F2P          -1.085 ppm
F2           -542.74 Hz
PPMCM        0.44232 ppm/cm
HZCM         221.25967 Hz/cm
    
```

Z-restored spin-echo 13C spectrum with 1H decoupling

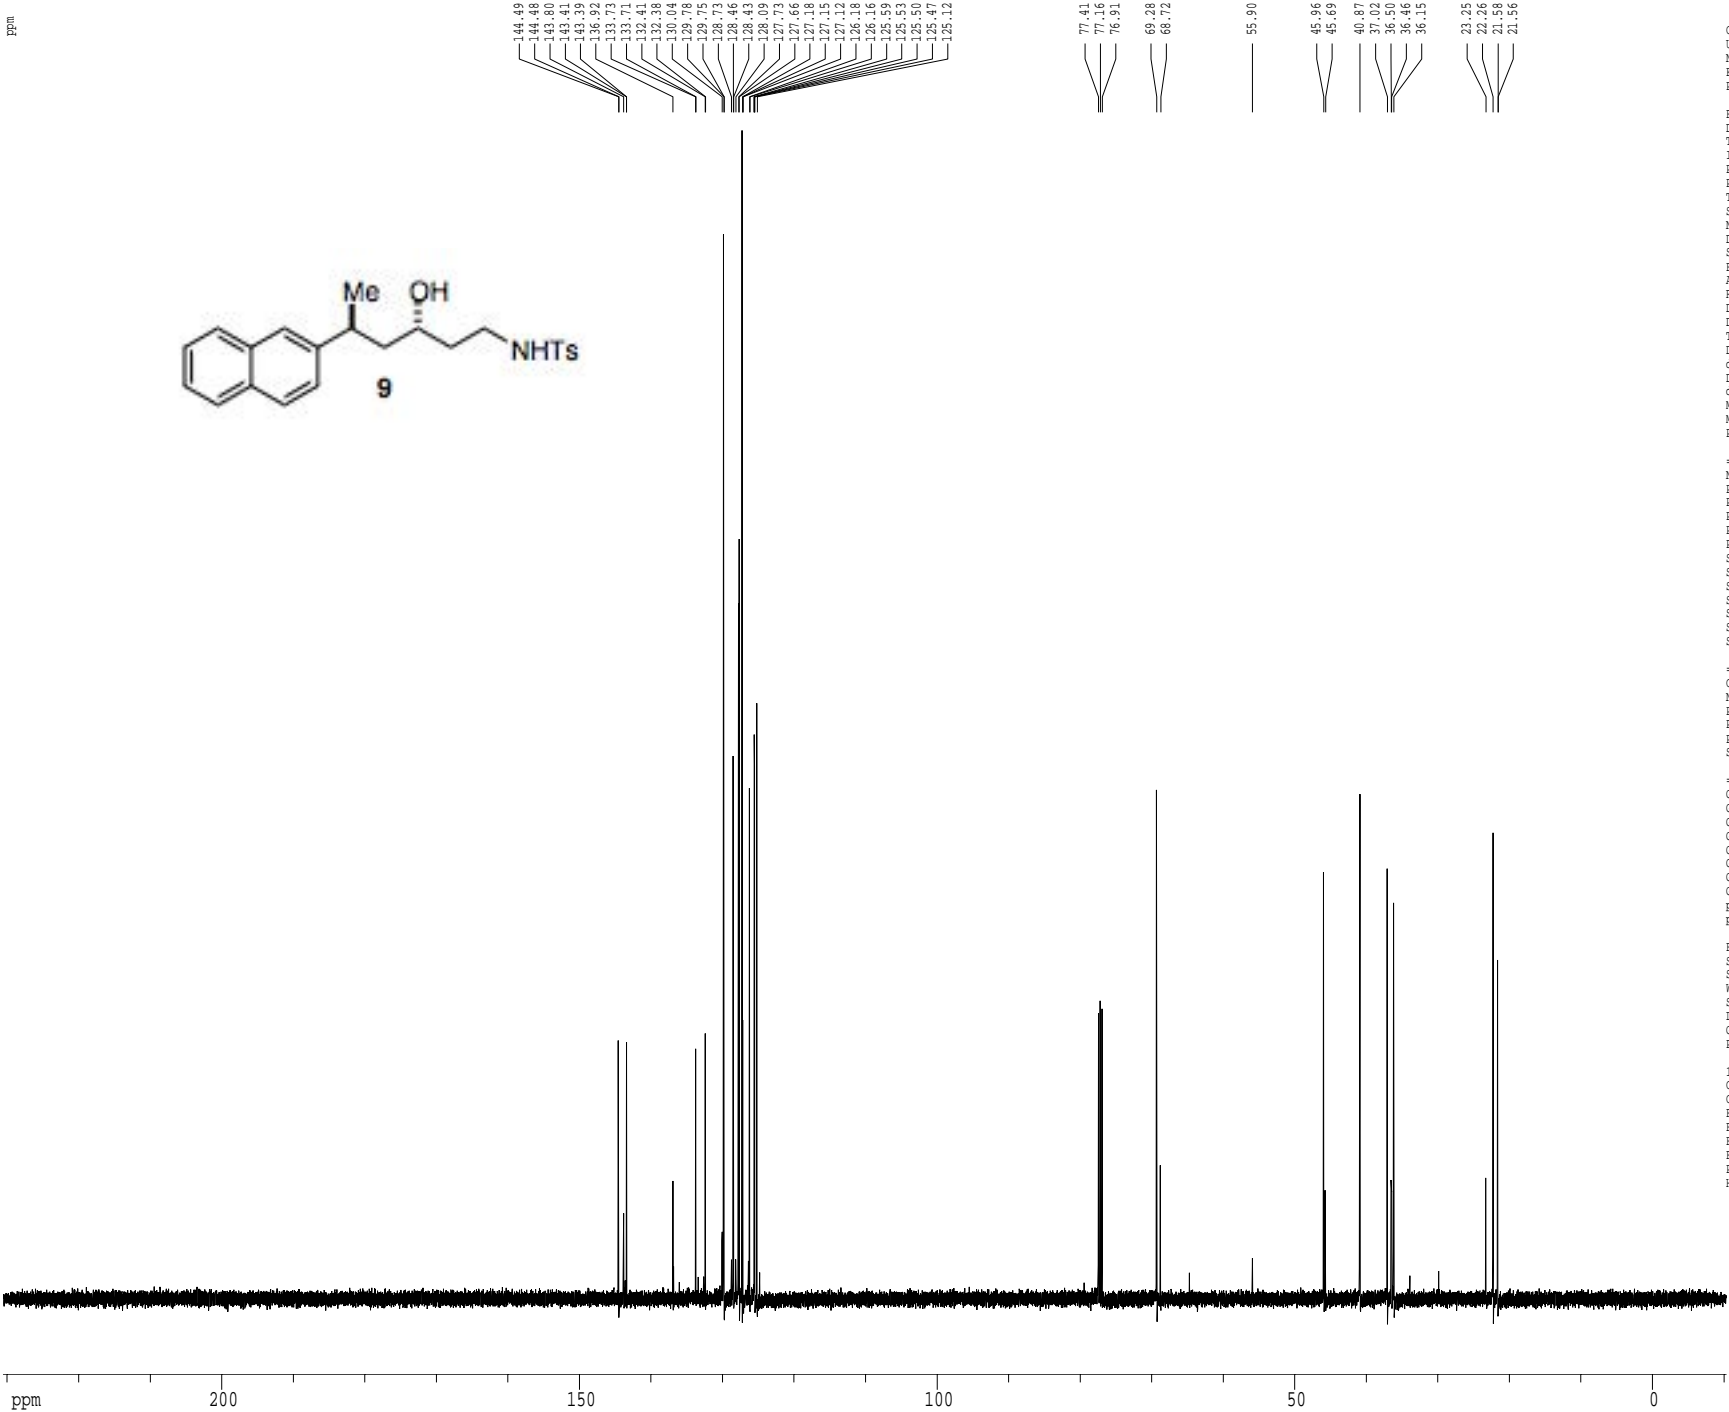

Current Data Parameters  
USER caherber  
NAME CAH-I-239-full  
EXPNO 2  
PROCNO 1

F2 - Acquisition Parameters  
Date\_ 20210623  
Time 11.43  
INSTRUM cryo500  
PROBHD 5 mm CPTCI 1H-  
PULPROG SpinEchopg30gp2.prd  
TD 65536  
SOLVENT CDCl3  
NS 296  
DS 16  
SWH 30303.031 Hz  
FIDRES 0.462388 Hz  
AQ 1.0813940 sec  
RG 14596.5  
DW 16.500 usec  
DE 6.00 usec  
TE 298.0 K  
D1 0.25000000 sec  
d11 0.03000000 sec  
D16 0.00020000 sec  
d17 0.00019600 sec  
MCREST 0.00000000 sec  
MCWIX 0.01500000 sec  
P2 37.70 usec

\*\*\*\*\* CHANNEL f1 \*\*\*\*\*  
NUC1 13C  
P1 18.85 usec  
P12 2000.00 usec  
P20 500.00 usec  
PL0 120.00 dB  
PL1 -1.00 dB  
SP01 125.7942548 MHz  
SP2 1.55 dB  
SP4 1.55 dB  
SPNAM2 Crp60comp.4  
SPNAM4 Crp60,0.5,20.1  
SPOFF2 0.00 Hz  
SPOFF4 0.00 Hz

\*\*\*\*\* CHANNEL f2 \*\*\*\*\*  
CPDPRG2 waltz16  
NUC2 1H  
PCPD2 100.00 usec  
PL2 1.60 dB  
PL12 22.00 dB  
SFO2 500.2225011 MHz

\*\*\*\*\* GRADIENT CHANNEL \*\*\*\*\*  
GPNAM1 SINE.100  
GPNAM2 SINE.100  
GPX1 0.00 %  
GPX2 0.00 %  
GPY1 0.00 %  
GPY2 0.00 %  
GPZ1 30.00 %  
GPZ2 50.00 %  
p15 500.00 usec  
p16 1000.00 usec

F2 - Processing parameters  
SI 65536  
SF 125.7804131 MHz  
WDW no  
SSB 0  
LB 0.00 Hz  
GB 0  
PC 2.00

1D NMR plot parameters  
CX 22.80 cm  
CY 15.65 cm  
F1P 230.637 ppm  
F1 29009.68 Hz  
F2P -10.287 ppm  
F2 -1293.96 Hz  
PPMCM 10.56688 ppm/cm  
HZCM 1329.10693 Hz/cm

# <sup>1</sup>H spectrum

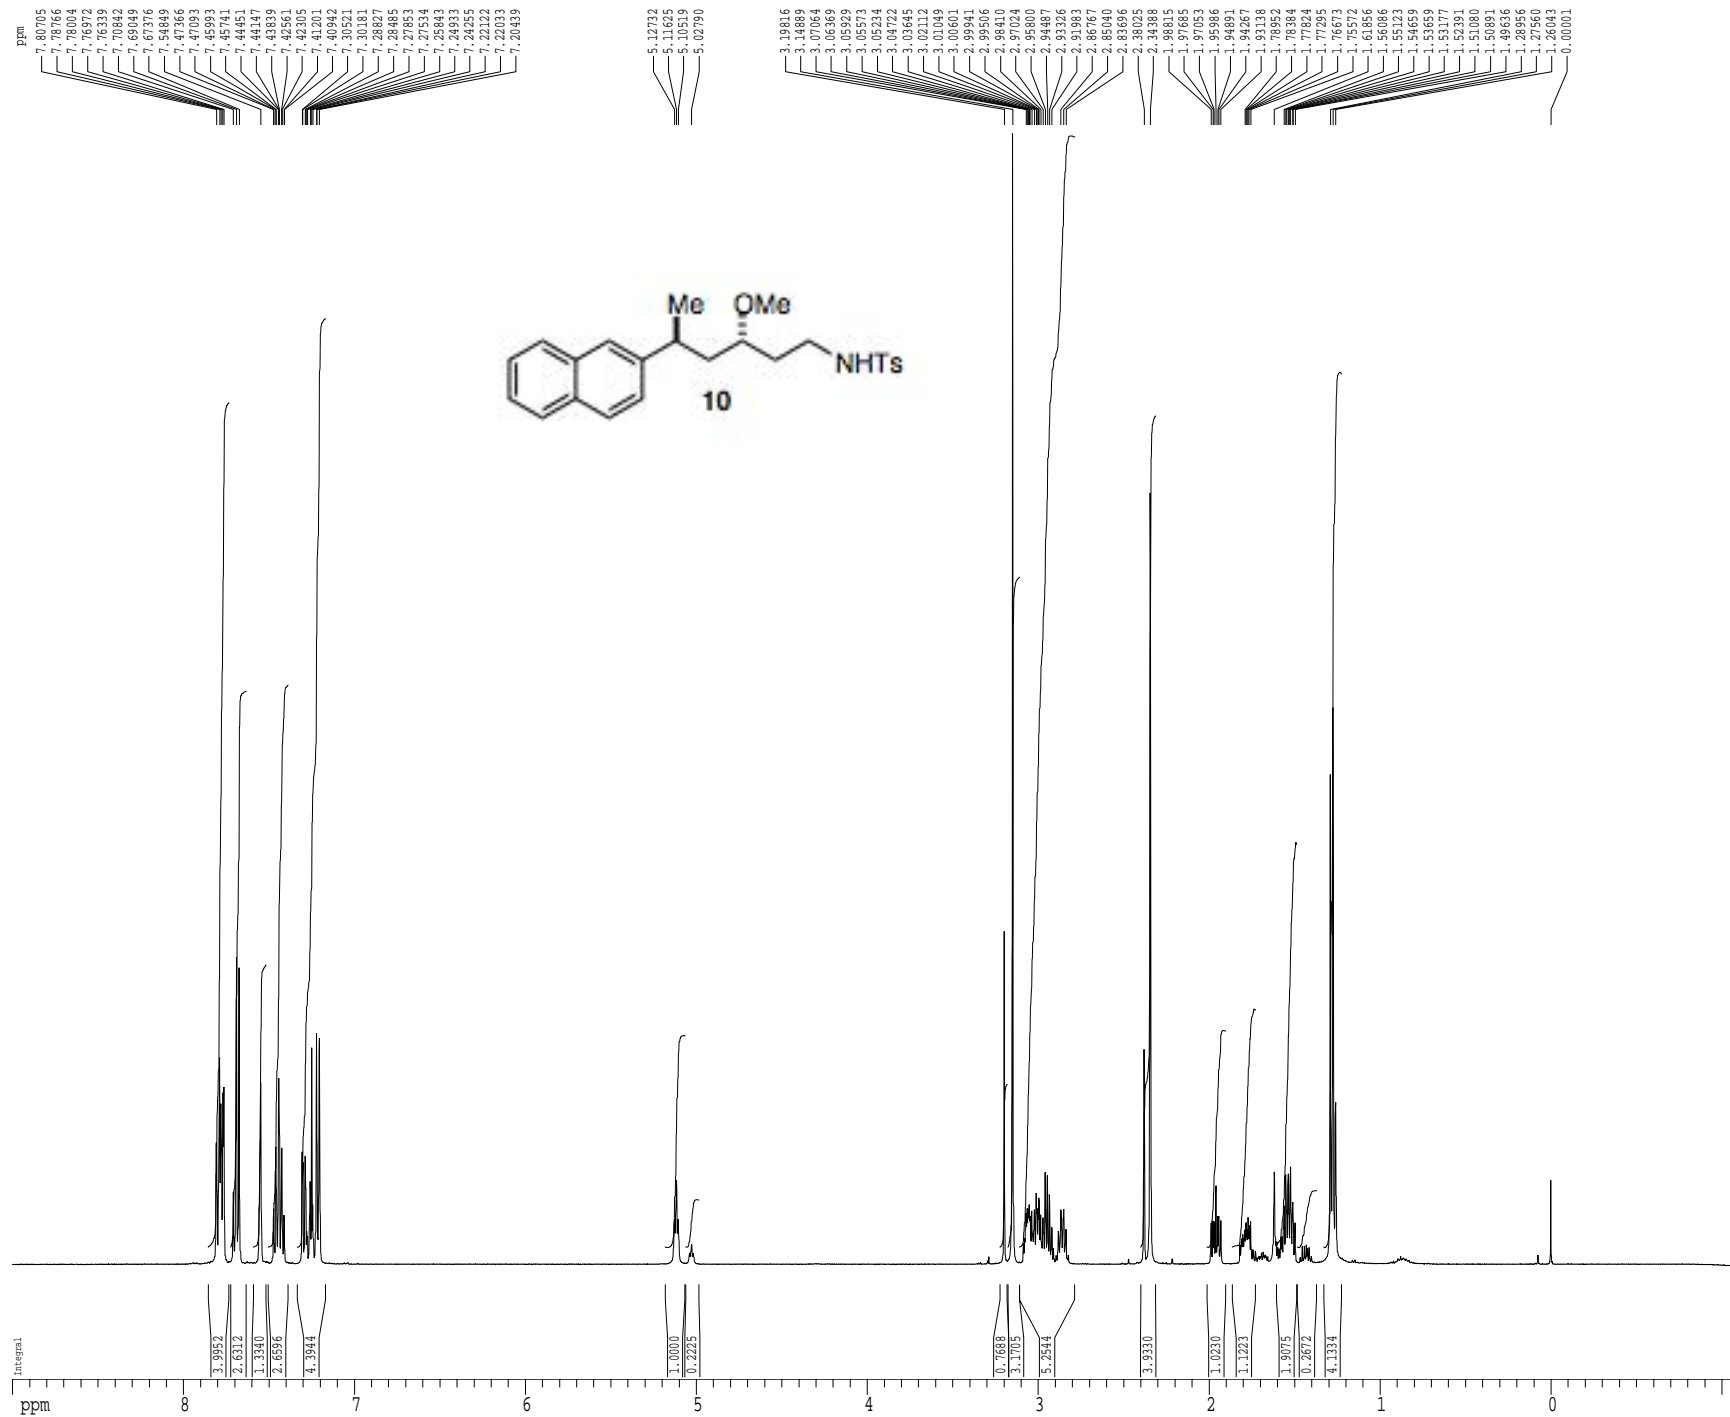

Current Data Parameters  
 USER caherber  
 NAME CAH-I-212  
 EXPNO 2  
 PROCNO 1

F2 - Acquisition Parameters  
 Date\_ 20210508  
 Time 10.24  
 INSTRUM cryo500  
 PROBHD 5 mm CPTCI 1H-  
 PULPROG zg30  
 TD 81728  
 SOLVENT CDCl3  
 NS 8  
 DS 2  
 SWH 8012.820 Hz  
 FIDRES 0.098043 Hz  
 AQ 5.0998774 sec  
 RG 4  
 DW 62.400 usec  
 DE 6.00 usec  
 TE 298.0 K  
 D1 0.10000000 sec  
 MCREST 0.00000000 sec  
 MCWREK 0.01500000 sec

===== CHANNEL f1 =====  
 NUC1 1H  
 P1 9.75 usec  
 PL1 1.60 dB  
 SFO1 500.2235015 MHz

F2 - Processing parameters  
 SI 65536  
 SF 500.2200364 MHz  
 WDW no  
 SSB 0  
 LB 0.00 Hz  
 GB 0  
 PC 1.00

1D NMR plot parameters  
 CY 22.80 cm  
 CY 15.00 cm  
 F1P 9.000 ppm  
 F1 4501.98 Hz  
 F2P -1.082 ppm  
 F2 -541.27 Hz  
 PPMCM 0.44220 ppm/cm  
 HZCM 221.19518 Hz/cm

Z-restored spin-echo 13C spectrum with 1H decoupling

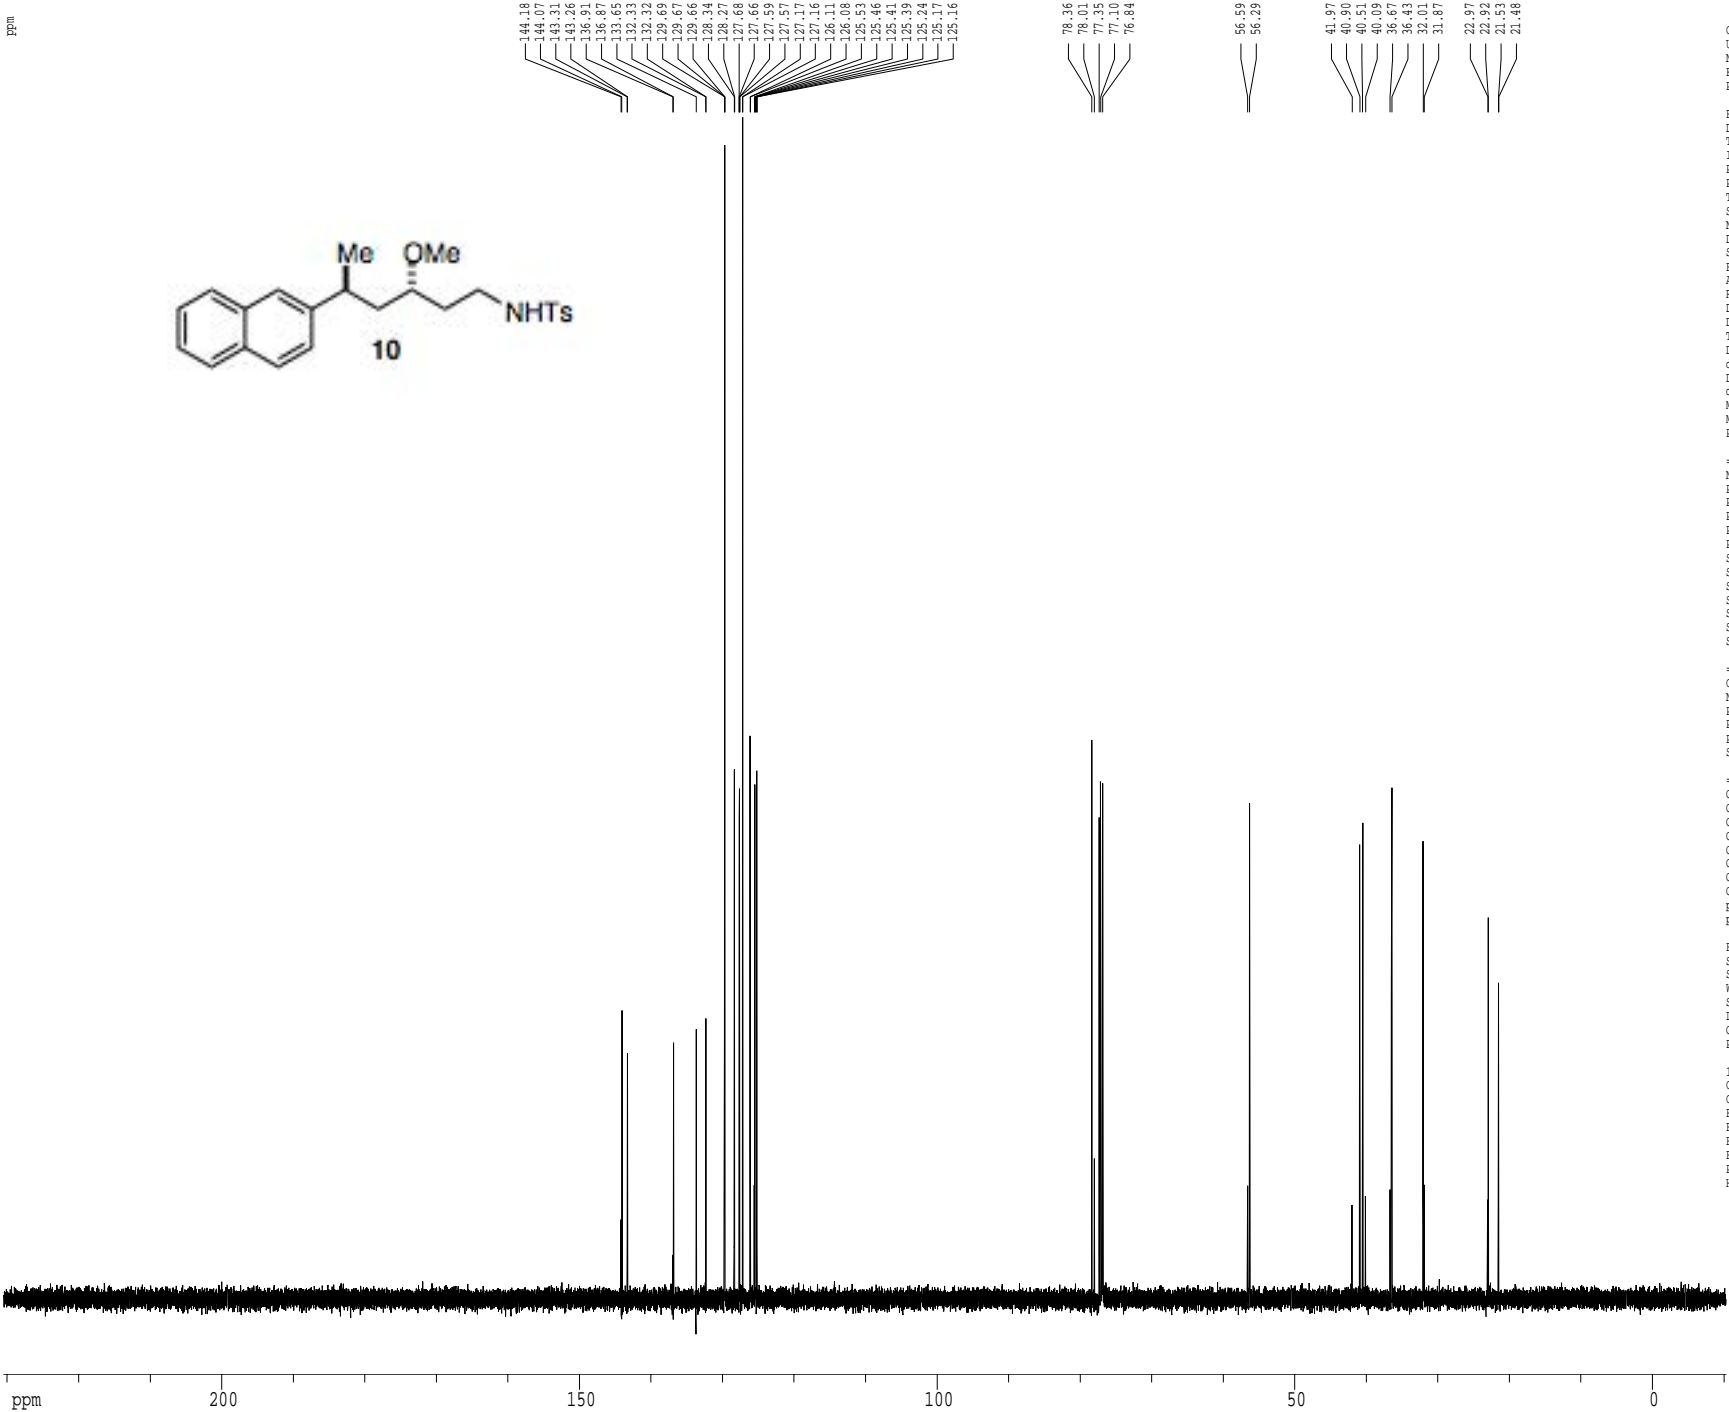

Current Data Parameters

USER caherber  
NAME CAH-I-212  
EXPNO 3  
PROCNO 1

F2 - Acquisition Parameters

Date\_ 20210508  
Time 10.28  
INSTRUM cryo500  
PROBHD 5 mm CPTCI 1H-  
PULPROG SpinEchopg30gp2.prd  
TD 65536  
SOLVENT CDCl3  
NS 144  
DS 16  
SWH 30303.031 Hz  
FIDRES 0.462388 Hz  
AQ 1.0813940 sec  
RG 2896.3  
DM 16.500 usec  
DE 6.00 usec  
TE 298.0 K  
D1 0.25000000 sec  
d11 0.03000000 sec  
d16 0.00020000 sec  
d17 0.00019600 sec  
MCREST 0.00000000 sec  
MCWEX 0.01500000 sec  
P2 37.70 usec

\*\*\*\*\* CHANNEL f1 \*\*\*\*\*

NUC1 13C  
P1 18.85 usec  
P12 2000.00 usec  
P20 500.00 usec  
PL0 120.00 dB  
PL1 -1.00 dB  
SFO1 125.7942548 MHz  
SP2 1.55 dB  
SP4 1.55 dB  
SPNAM2 Crp60comp.4  
SPNAM4 Crp60,0.5,20.1  
SPOFF2 0.00 Hz  
SPOFF4 0.00 Hz

\*\*\*\*\* CHANNEL f2 \*\*\*\*\*

CPDPRG2 waltz16  
NUC2 1H  
PCPD2 100.00 usec  
PL2 1.60 dB  
PL12 22.00 dB  
SFO2 500.2225011 MHz

\*\*\*\*\* GRADIENT CHANNEL \*\*\*\*\*

GPAM1 SINE.100  
GPAM2 SINE.100  
GPX1 0.00 %  
GPX2 0.00 %  
GPY1 0.00 %  
GPY2 0.00 %  
GPZ1 30.00 %  
GPZ2 50.00 %  
p15 500.00 usec  
p16 1000.00 usec

F2 - Processing parameters

SI 65536  
SF 125.7804190 MHz  
WDW no  
SSB 0  
LB 0.00 Hz  
GB 0  
PC 2.00

1D NMR plot parameters

CX 22.80 cm  
CY 15.65 cm  
F1P 230.637 ppm  
F1 29009.68 Hz  
F2P -10.287 ppm  
F2 -1293.96 Hz  
PPMCM 10.56688 ppm/cm  
HZCM 1329.10706 Hz/cm

# <sup>1</sup>H spectrum

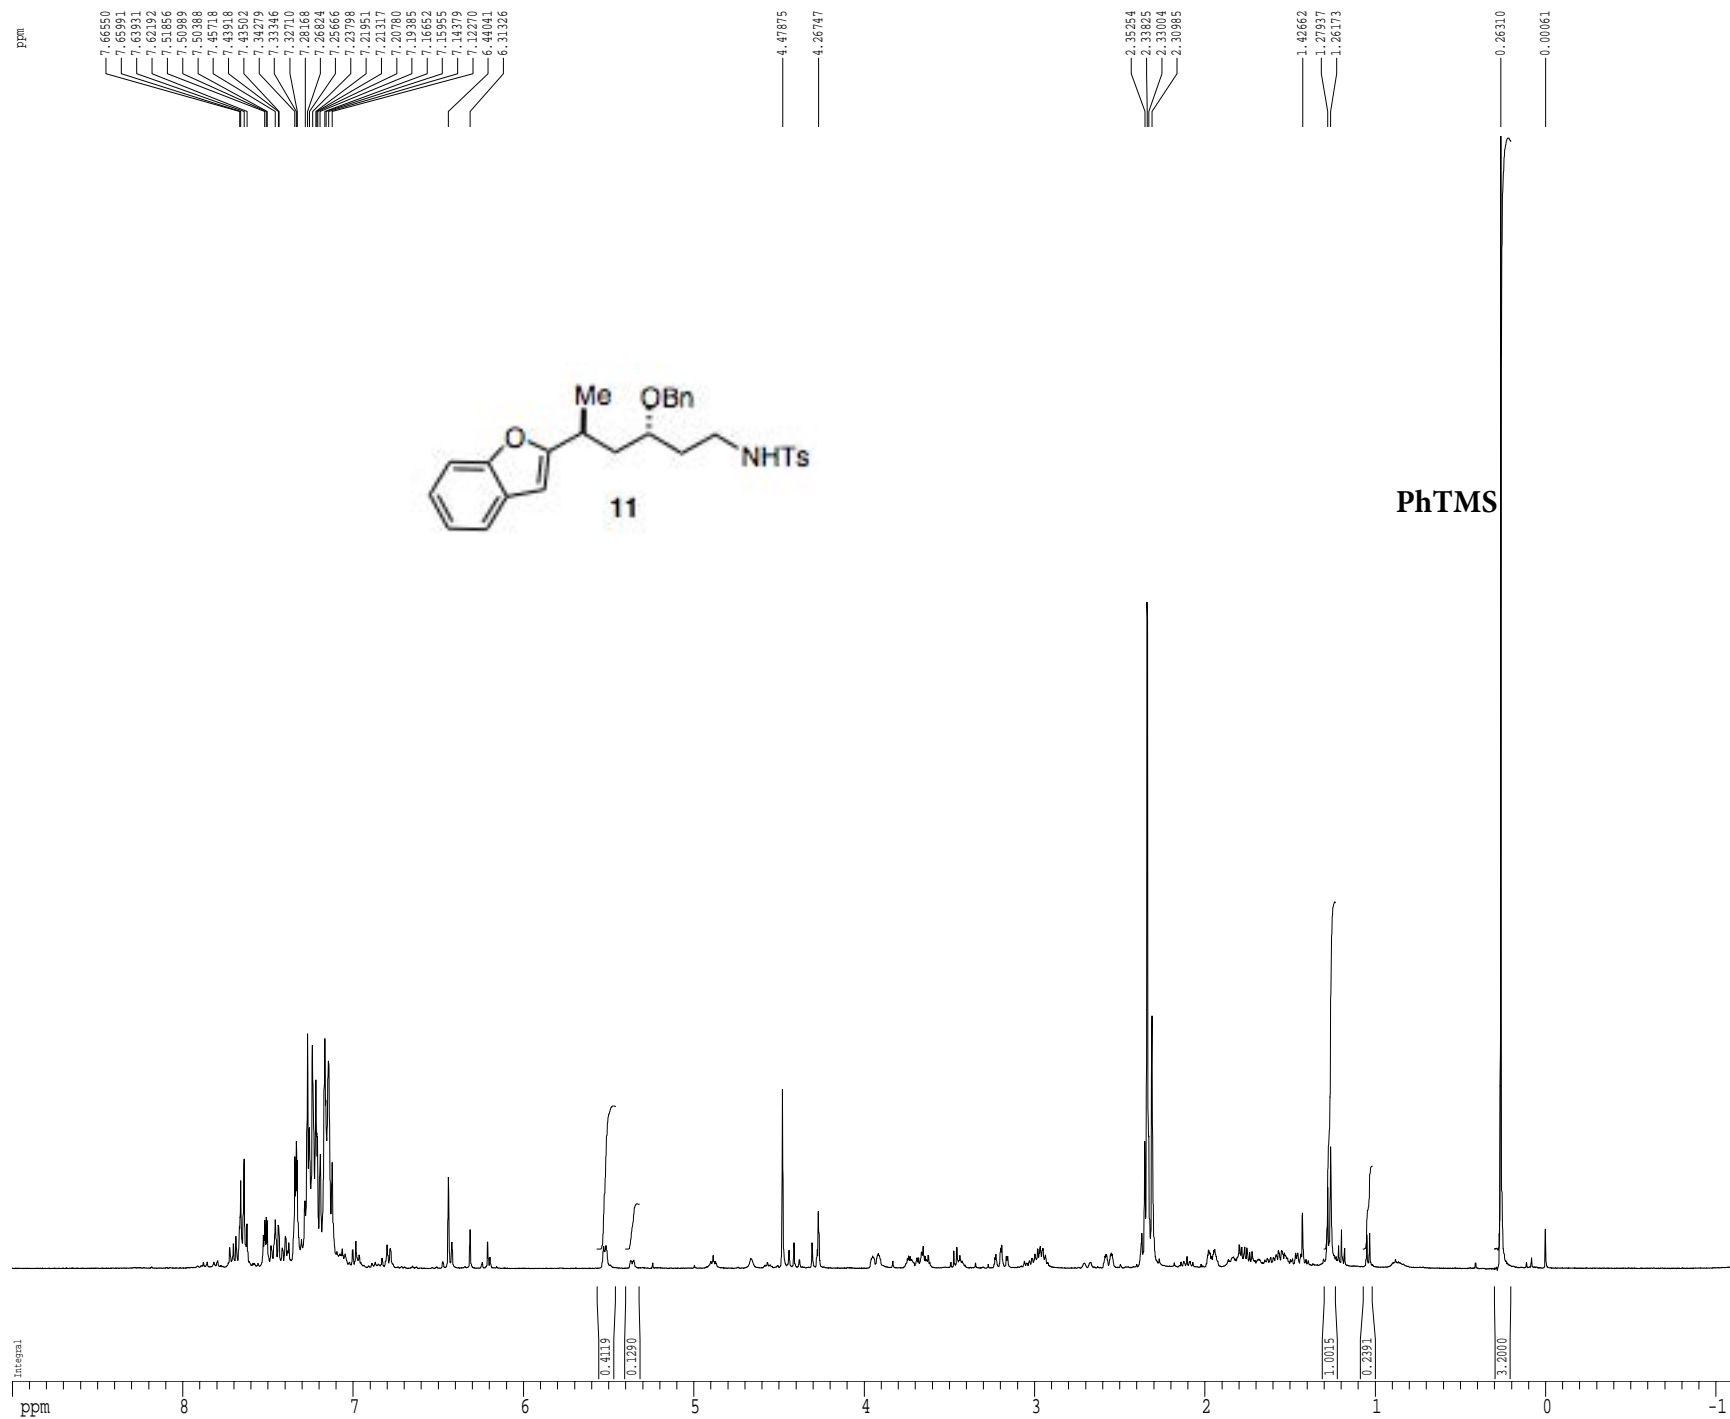

Current Data Parameters  
 USER caherber  
 NAME CAH-I-233-Crude  
 EXPNO 1  
 PROCNO 1

F2 - Acquisition Parameters  
 Date\_ 20210604  
 Time 16.44  
 INSTRUM drx400  
 PROBHD 5 mm QNP H/F/P  
 PULPROG zg30  
 TD 65536  
 SOLVENT CDCl3  
 NS 8  
 DS 2  
 SWH 6410.256 Hz  
 FIDRES 0.097813 Hz  
 AQ 5.1118579 sec  
 RG 71.8  
 DW 78.000 usec  
 DE 4.50 usec  
 TE 298.0 K  
 D1 0.10000000 sec  
 MCREST 0.00000000 sec  
 MCWRE 0.01500000 sec

===== CHANNEL f1 =====  
 NUC1 1H  
 P1 12.00 usec  
 PL1 -1.60 dB  
 SFO1 400.1328009 MHz

F2 - Processing parameters  
 SI 65536  
 SF 400.1300427 MHz  
 WDW no  
 SSB 0  
 LB 0.00 Hz  
 GB 0  
 PC 2.00

1D NMR plot parameters  
 CX 22.80 cm  
 CY 15.00 cm  
 F1P 9.000 ppm  
 F1 3601.17 Hz  
 F2P -1.117 ppm  
 F2 -446.91 Hz  
 PPMCM 0.44372 ppm/cm  
 HZCM 177.54726 Hz/cm

<sup>1</sup>H spectrum

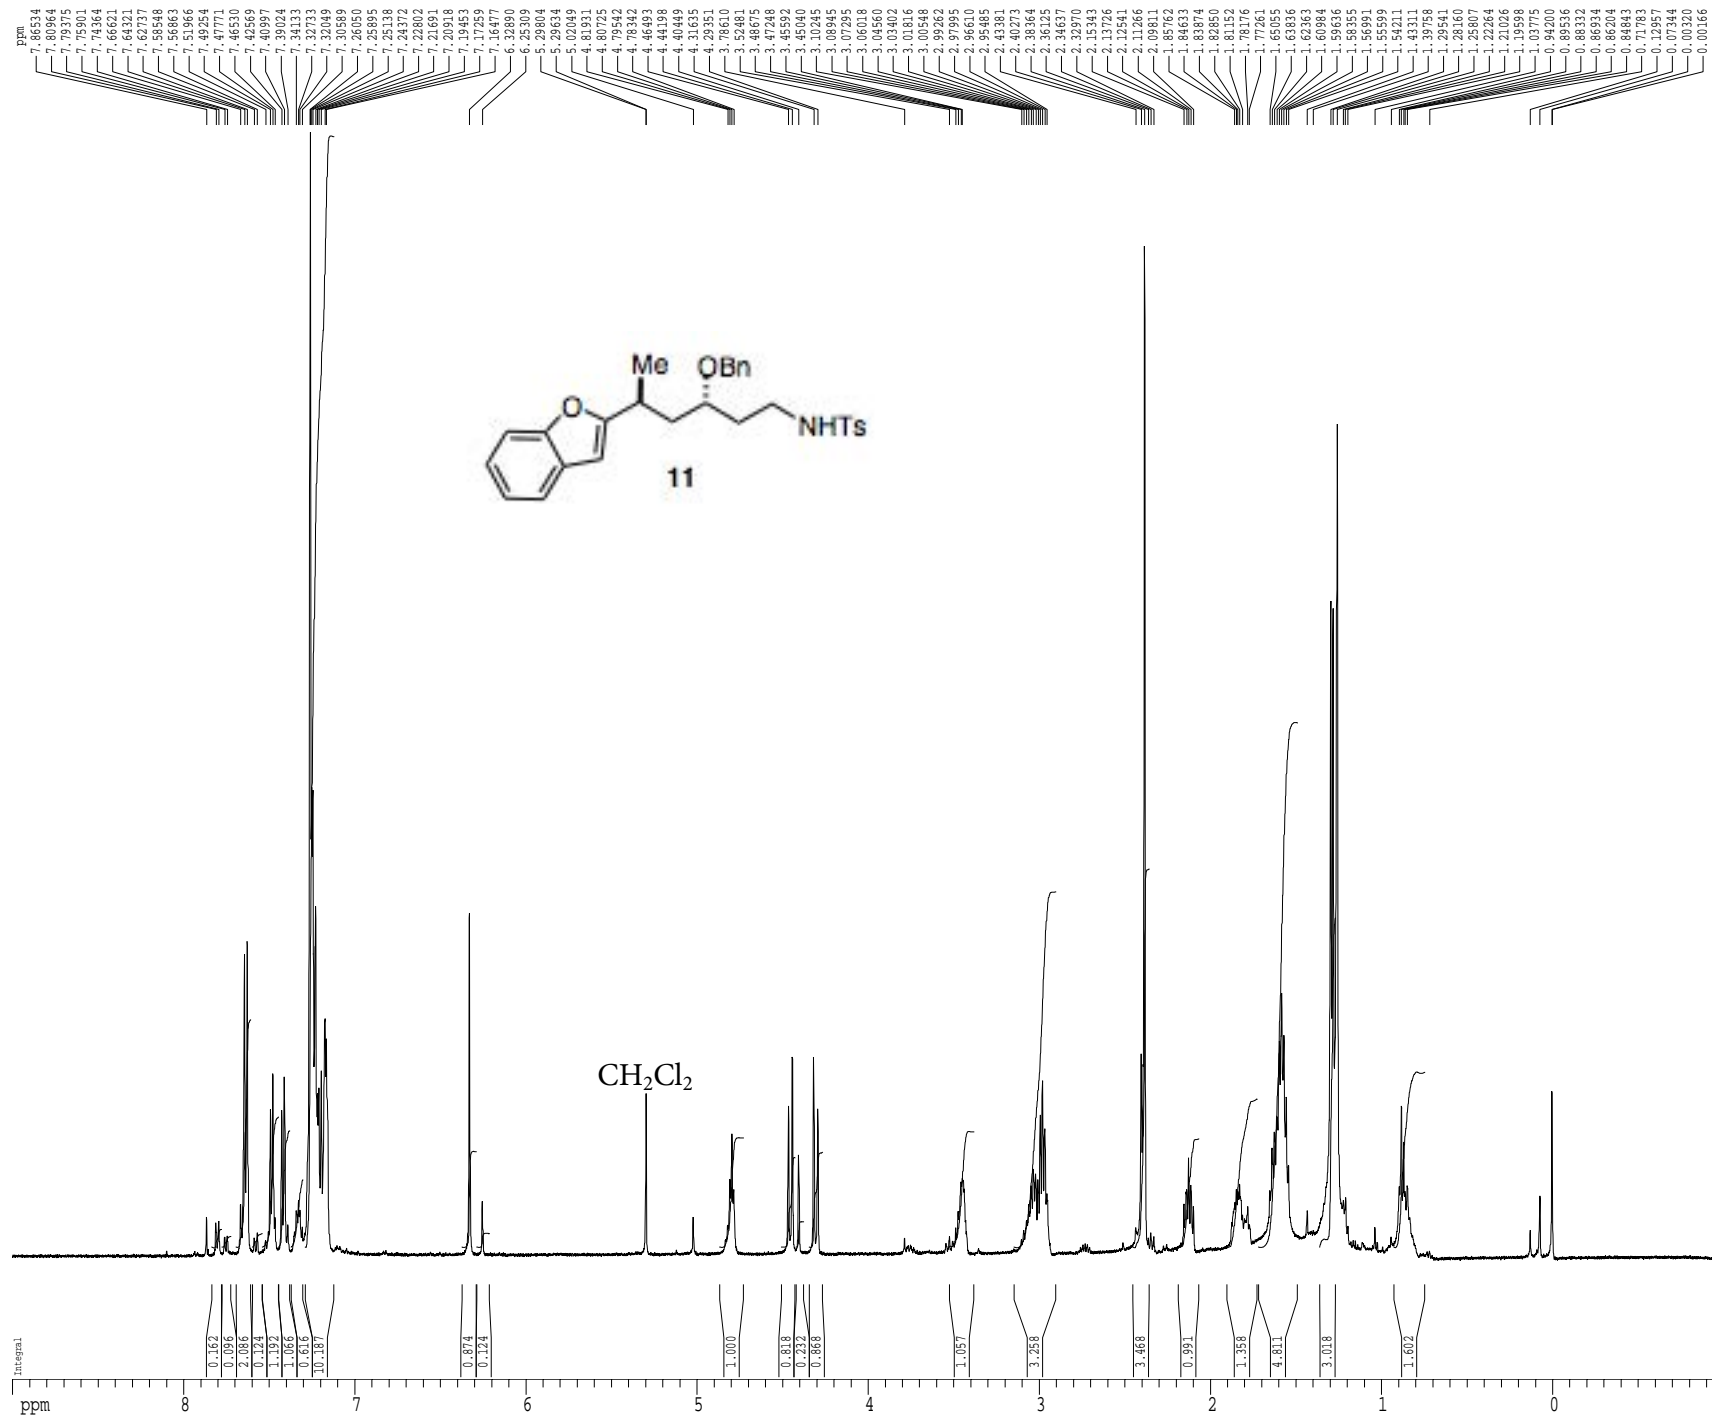

Current Data Parameters  
 USER caherber  
 NAME CAH-I-246-full  
 EXPNO 1  
 PROCNO 1

F2 - Acquisition Parameters  
 Date\_ 20210708  
 Time 11.14  
 INSTRUM cryo500  
 PROBHD 5 mm CPTCI 1H-  
 PULPROG zg30  
 TD 81728  
 SOLVENT CDCl3  
 NS 8  
 DS 2  
 SWH 8012.820 Hz  
 FIDRES 0.098043 Hz  
 AQ 5.0998774 sec  
 RG 6.3  
 DW 62.400 usec  
 DE 6.00 usec  
 TE 298.0 K  
 D1 0.10000000 sec  
 MCREST 0.00000000 sec  
 MCWRE 0.01500000 sec

===== CHANNEL f1 =====  
 NUC1 1H  
 P1 9.75 usec  
 PL1 1.60 dB  
 SFO1 500.2235015 MHz

F2 - Processing parameters  
 SI 65536  
 SF 500.2200313 MHz  
 WDW no  
 SSB 0  
 LB 0.00 Hz  
 GB 0  
 PC 1.00

1D NMR plot parameters  
 CY 22.80 cm  
 CY 15.00 cm  
 F1P 9.000 ppm  
 F1 4501.98 Hz  
 F2P -1.072 ppm  
 F2 -536.14 Hz  
 PPMCM 0.44175 ppm/cm  
 HZCM 220.97008 Hz/cm



Z-restored spin-echo 13C spectrum with 1H decoupling

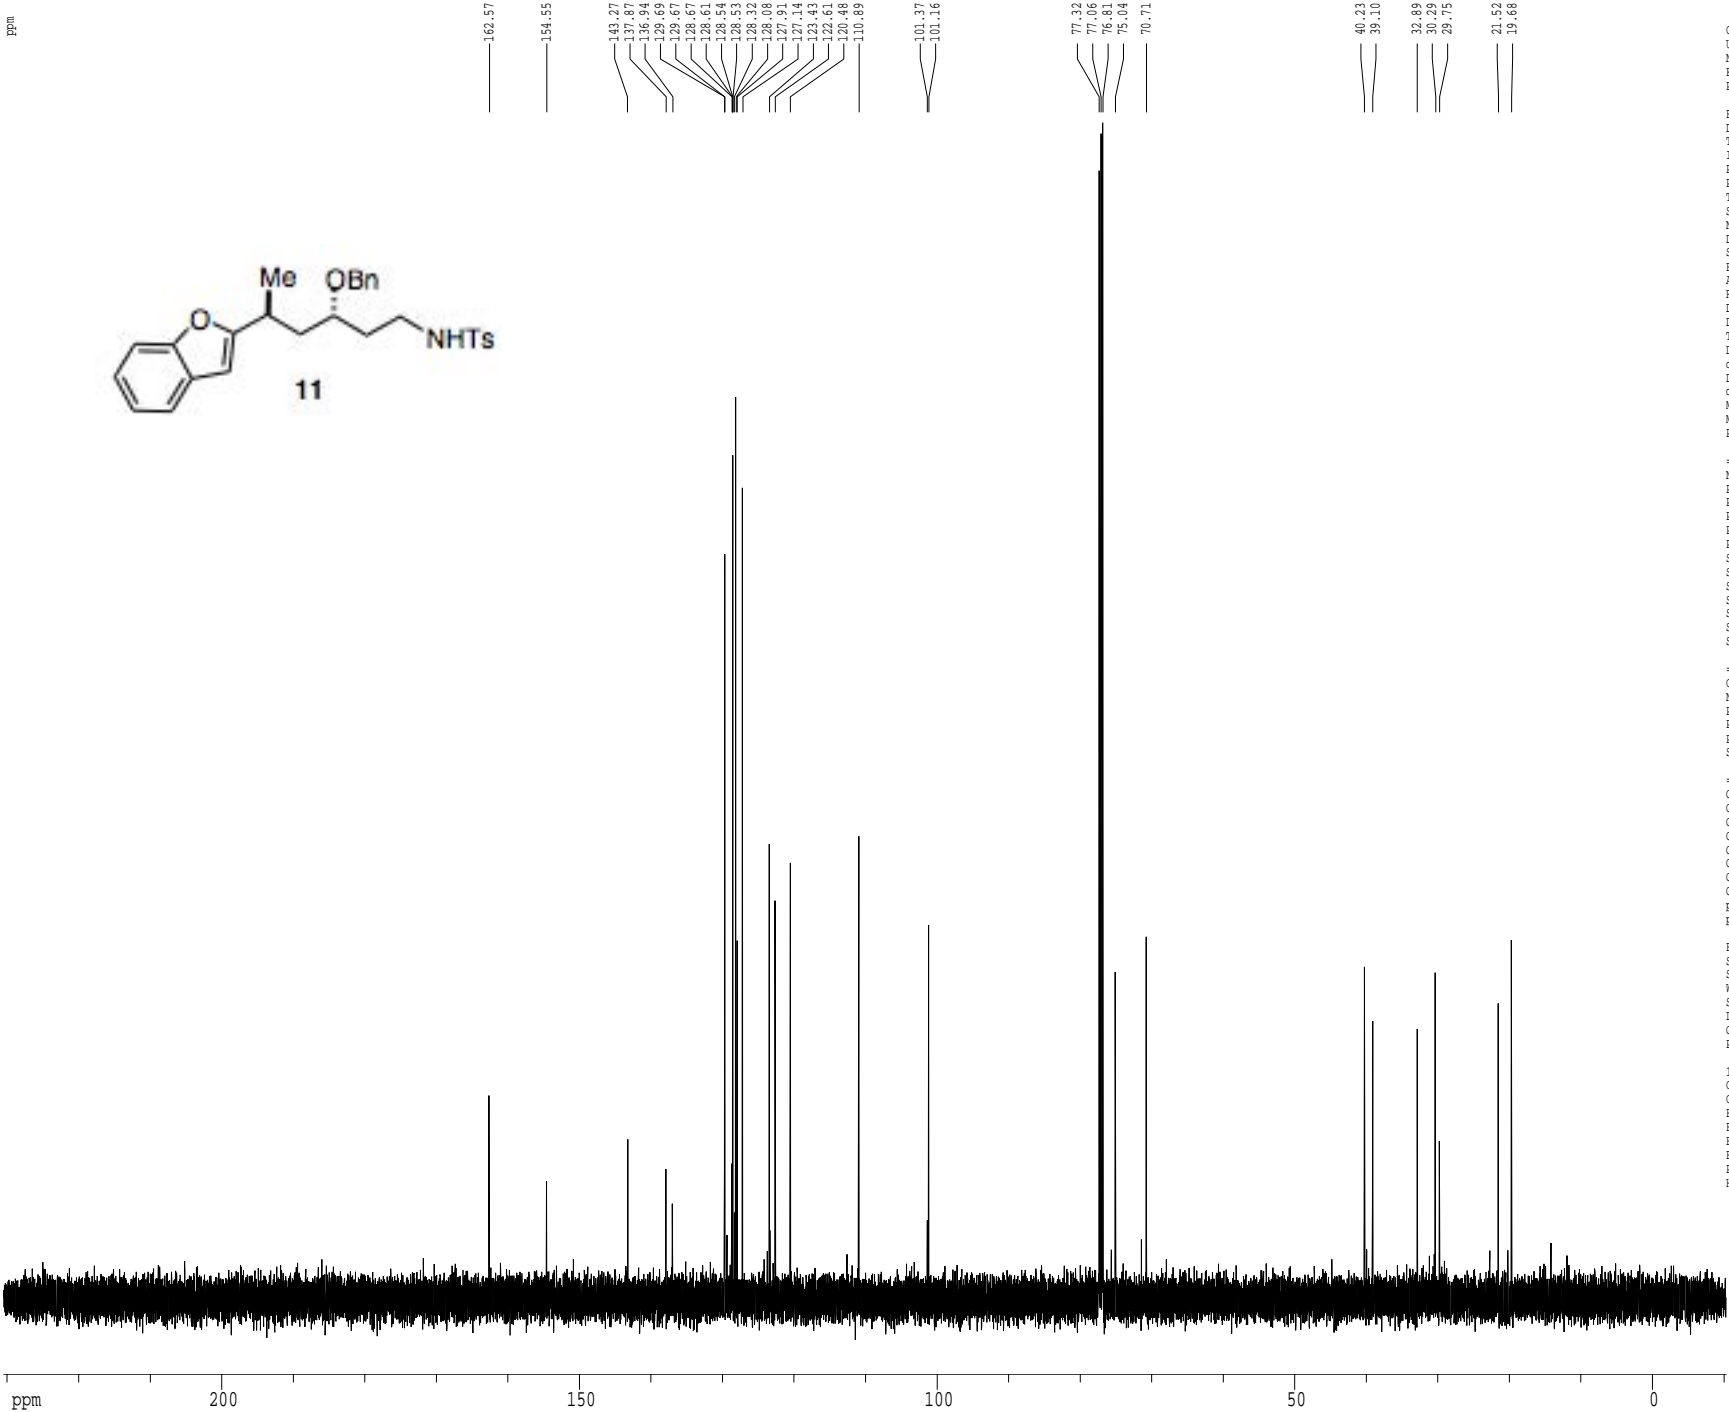

Current Data Parameters

USER caherber  
NAME CAH-I-246-full  
EXPNO 2  
PROCNO 1

F2 - Acquisition Parameters

Date\_ 20210708  
Time 11.23  
INSTRUM cryo500  
PROBHD 5 mm CPTCI 1H-  
PULPROG SpinEchopg30gp2.prd  
TD 65536  
SOLVENT CDCl3  
NS 448  
DS 16  
SWH 30303.031 Hz  
FIDRES 0.462388 Hz  
AQ 1.0813940 sec  
RG 14596.5  
DW 16.500 usec  
DE 6.00 usec  
TE 298.0 K  
D1 0.25000000 sec  
d11 0.03000000 sec  
D16 0.00020000 sec  
d17 0.00019600 sec  
MCREST 0.00000000 sec  
MCMKX 0.01500000 sec  
P2 37.70 usec

===== CHANNEL f1 =====

NUC1 13C  
P1 18.85 usec  
P12 2000.00 usec  
P20 500.00 usec  
PL0 120.00 dB  
PL1 -1.00 dB  
SP01 125.7942548 MHz  
SP2 1.55 dB  
SP4 1.55 dB  
SPNAM2 Crp60comp.4  
SPNAM4 Crp60,0.5,20.1  
SPOFF2 0.00 Hz  
SPOFF4 0.00 Hz

===== CHANNEL f2 =====

CPDPRG2 waltz16  
NUC2 1H  
PCPD2 100.00 usec  
PL2 1.60 dB  
PL12 22.00 dB  
SFO2 500.2225011 MHz

===== GRADIENT CHANNEL =====

GPAM1 SINE.100  
GPAM2 SINE.100  
GPX1 0.00 %  
GPX2 0.00 %  
GPY1 0.00 %  
GPY2 0.00 %  
GPZ1 30.00 %  
GPZ2 50.00 %  
p15 500.00 usec  
p16 1000.00 usec

F2 - Processing parameters

SI 65536  
SF 125.7804190 MHz  
WDW no  
SSB 0  
LB 0.00 Hz  
GB 0  
PC 2.00

1D NMR plot parameters

CX 22.80 cm  
CY 15.65 cm  
F1P 230.637 ppm  
F1 29009.68 Hz  
F2P -10.287 ppm  
F2 -1293.96 Hz  
PPMCM 10.56688 ppm/cm  
HZCM 1329.10706 Hz/cm

# <sup>1</sup>H spectrum

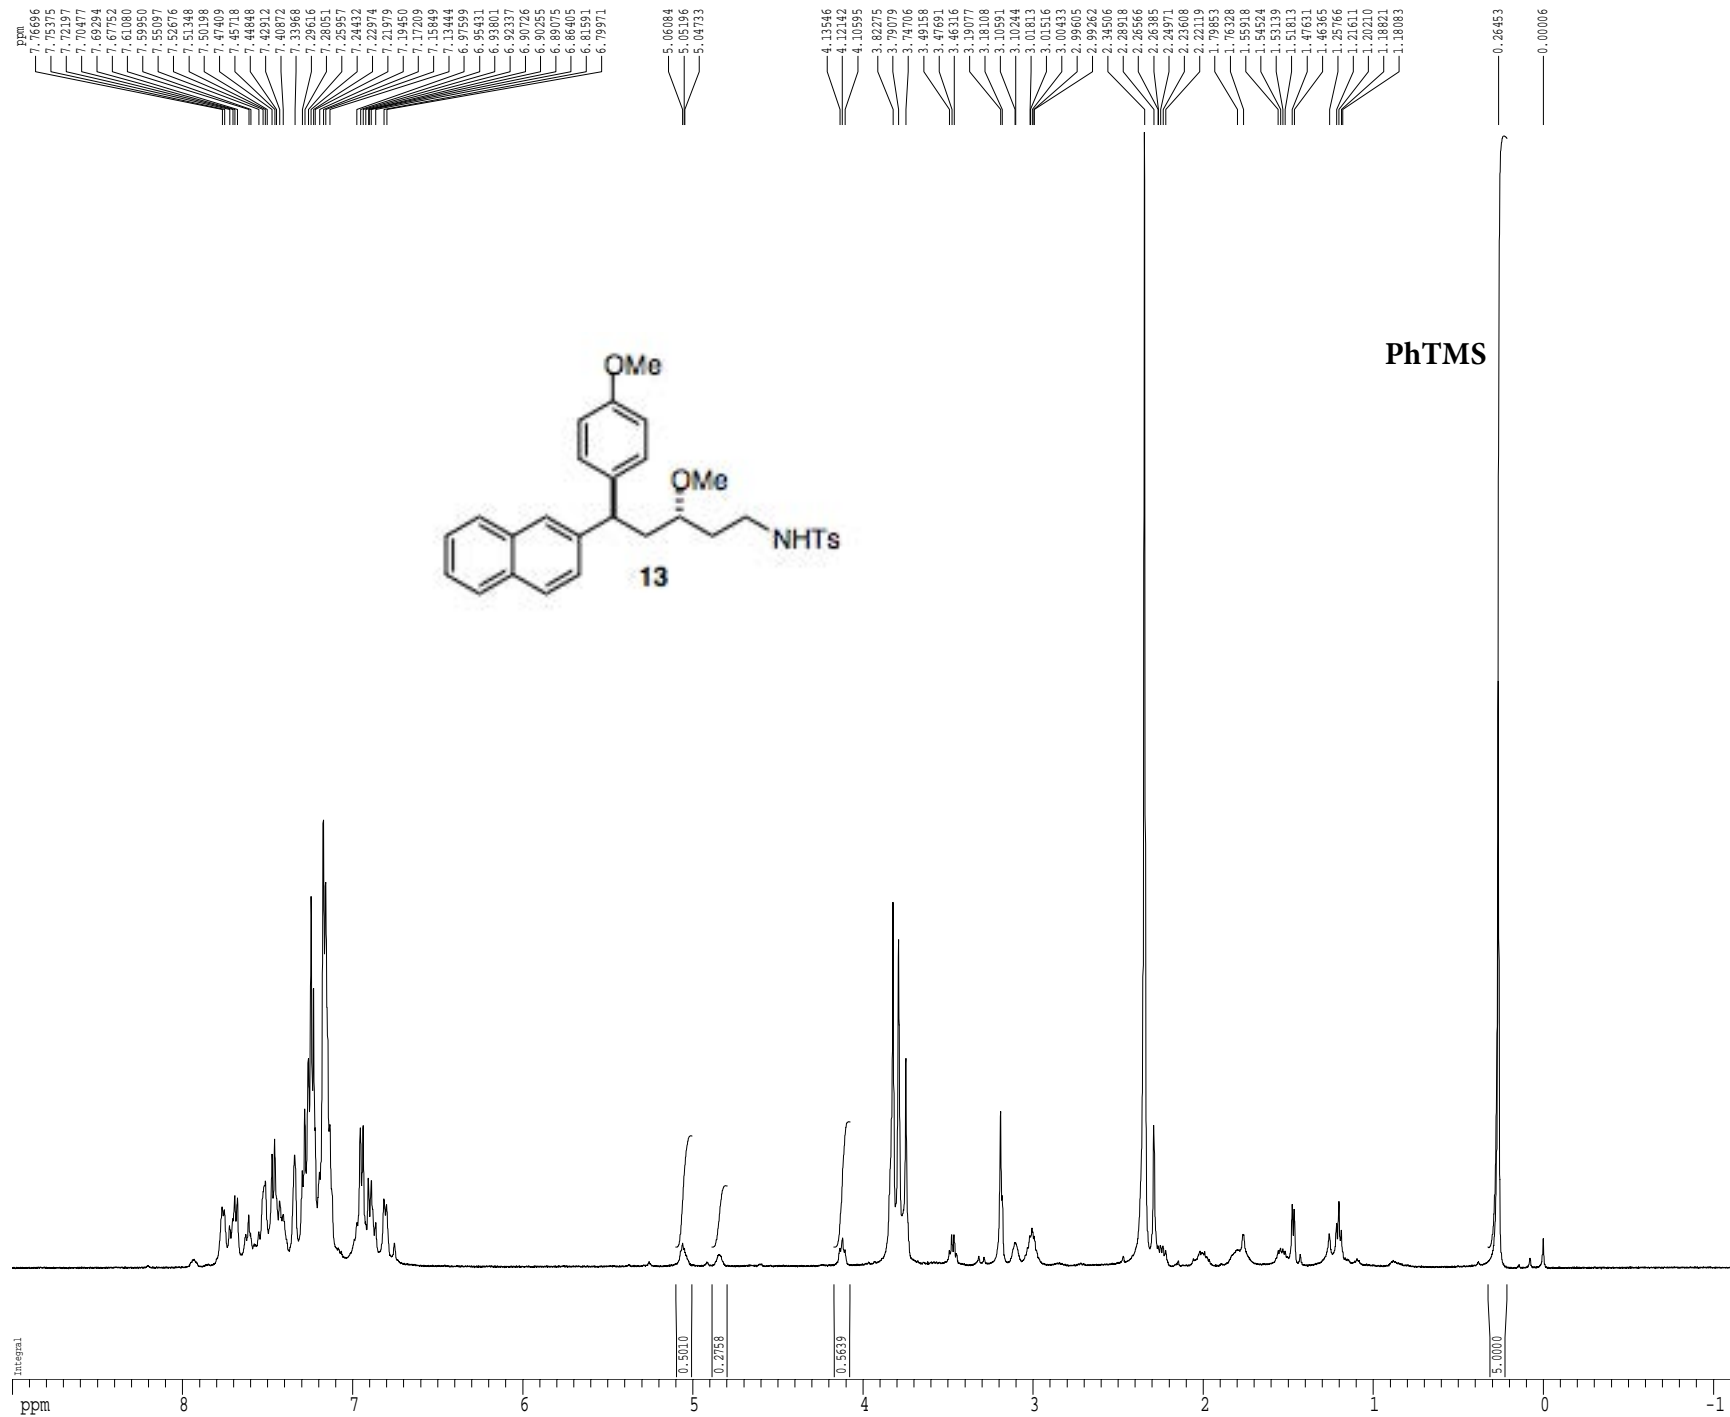

Current Data Parameters  
 USER caherber  
 NAME CAH-I-284-Crude  
 EXPNO 1  
 PROCNO 1

F2 - Acquisition Parameters  
 Date\_ 20210917  
 Time 10.29  
 INSTRUM gn500  
 PROBHD 5 mm broadband  
 PULPROG zg30  
 TD 81728  
 SOLVENT CDCl3  
 NS 8  
 DS 2  
 SWH 8012.820 Hz  
 FIDRES 0.098043 Hz  
 AQ 5.0998774 sec  
 RG 90.5  
 DW 62.400 usec  
 DE 6.00 usec  
 TE 298.0 K  
 D1 0.10000000 sec  
 MCREST 0.00000000 sec  
 MCWRE 0.01500000 sec

===== CHANNEL f1 =====  
 NUC1 1H  
 P1 12.00 usec  
 PL1 -6.00 dB  
 SF01 498.6534906 MHz

F2 - Processing parameters  
 SI 65536  
 SF 498.6500485 MHz  
 WDW no  
 SSB 0  
 LB 0.00 Hz  
 GB 0  
 PC 1.00

1D NMR plot parameters  
 CX 22.80 cm  
 CY 15.00 cm  
 F1P 9.000 ppm  
 F1 4487.85 Hz  
 F2P -1.132 ppm  
 F2 -564.38 Hz  
 PPMCM 0.44438 ppm/cm  
 HZCM 221.58908 Hz/cm

<sup>1</sup>H

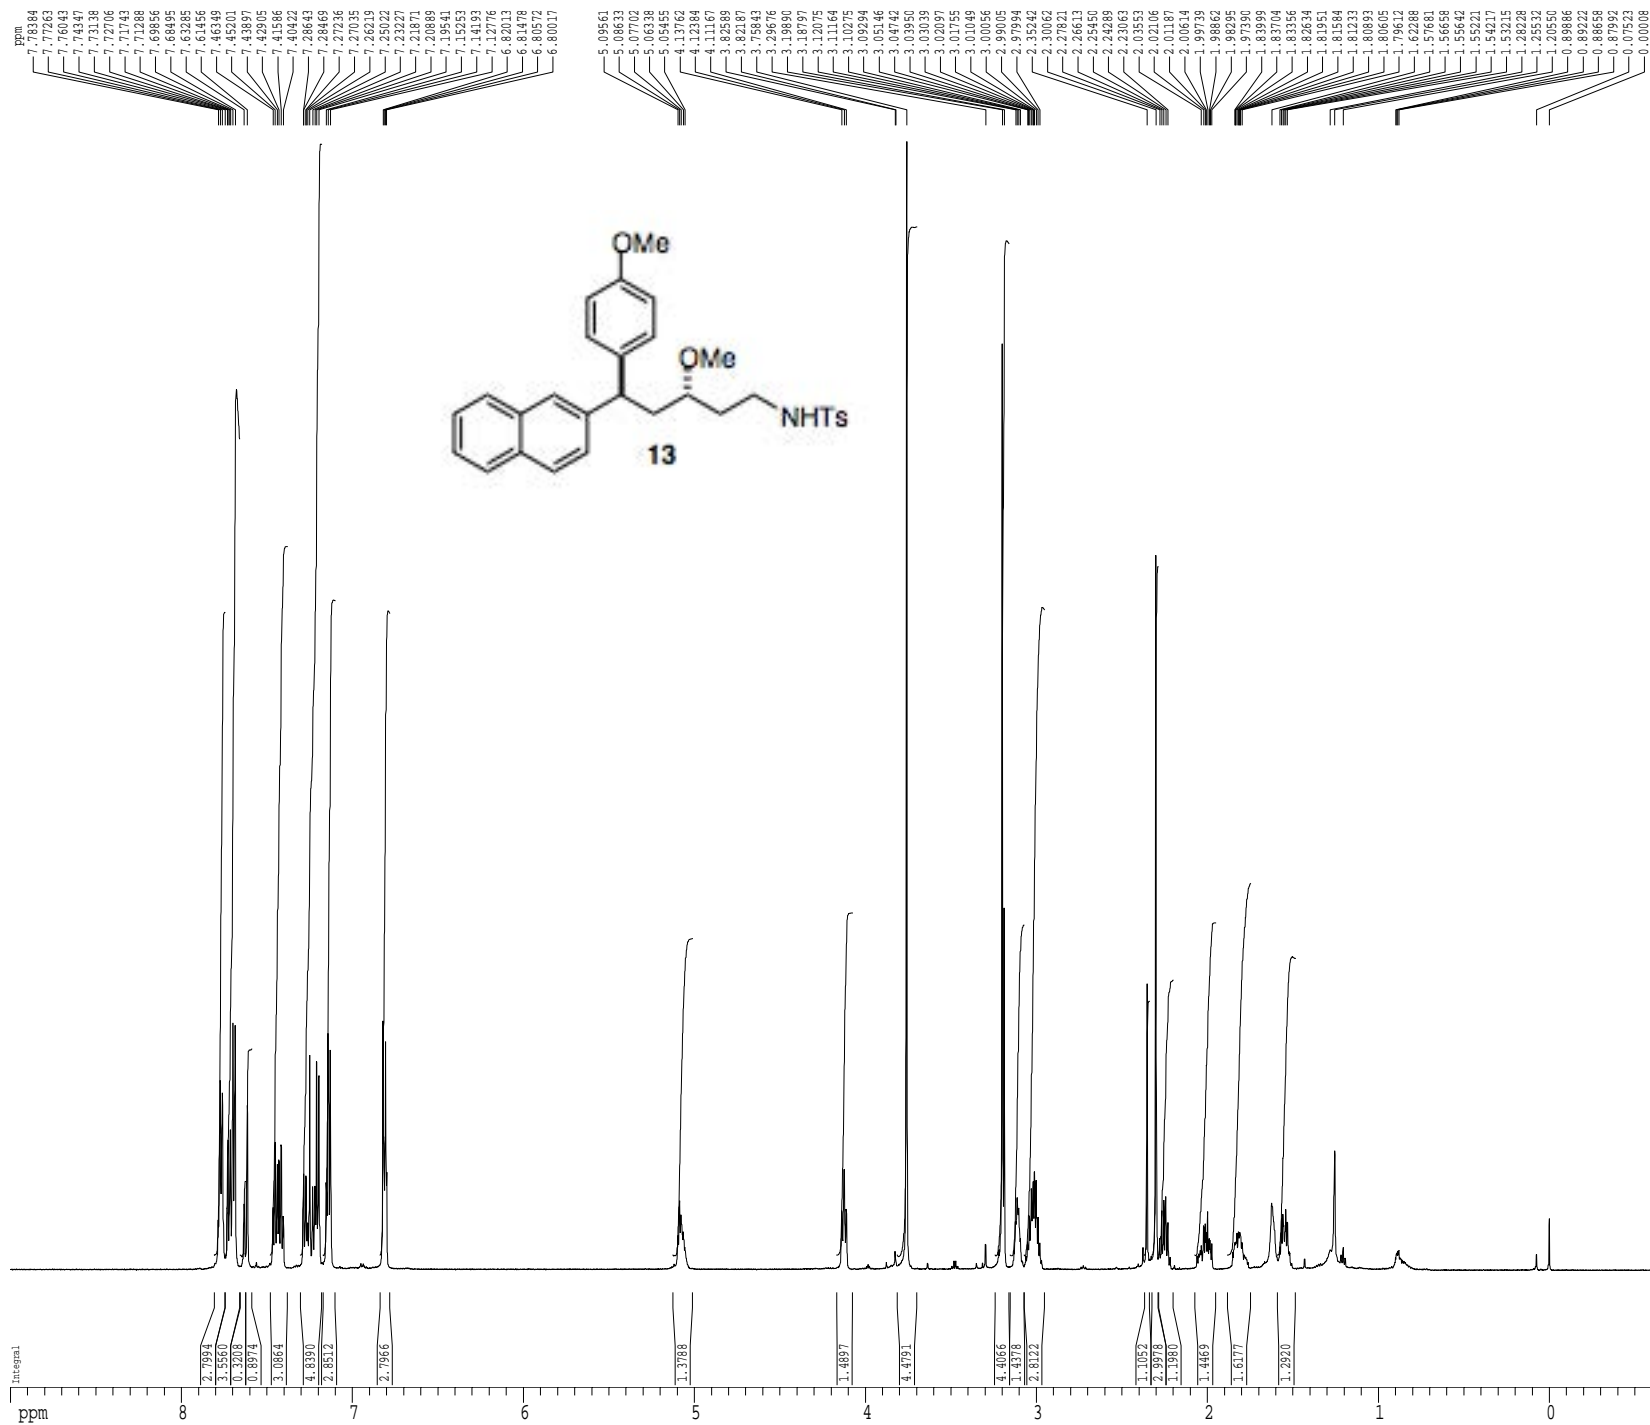

Current Data Parameters  
USER caherber  
NAME CAH-I-285-f11-600  
EXPNO 4  
PROCNO 1

F2 - Acquisition Parameters  
Date\_ 20210920  
Time 10.59  
INSTRUM av600  
PROBHD 5 mm CPBBO BB-  
PULPROG zg30  
TD 989744  
SOLVENT CDCl3  
NS 8  
DS 2  
SWH 9615.385 Hz  
FIDRES 0.098042 Hz  
AQ 5.0998979 sec  
RG 10  
DW 52.000 usec  
DE 14.23 usec  
TE 298.0 K  
D1 0.10000000 sec  
TD0 1

\*\*\*\*\* CHANNEL f1 \*\*\*\*\*  
SF01 600.1342009 MHz  
NUC1 1H  
P1 9.50 usec

F2 - Processing parameters  
SI 65536  
SF 600.1300407 MHz  
WDW no  
SSB 0  
LB 0.00 Hz  
GB 0  
PC 1.00

1D NMR plot parameters  
CX 22.80 cm  
CY 15.00 cm  
FIP 9.000 ppm  
F1 5401.17 Hz  
F2 -1.079 ppm  
F2 -647.47 Hz  
PPMCM 0.44206 ppm/cm  
HZCM 265.29141 Hz/cm

13C

ppm

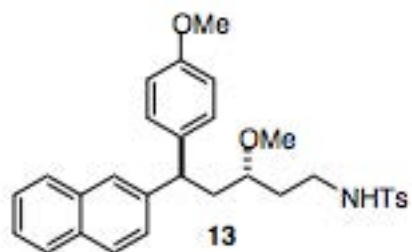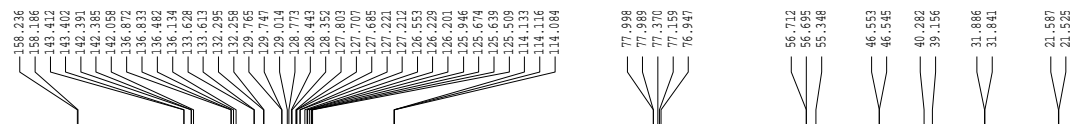

Current Data Parameters  
 USER caherber  
 NAME CAH-I-285-f11-600  
 EXPNO 5  
 PROCNO 1

F2 - Acquisition Parameters  
 Date\_ 20210920  
 Time 11.09  
 INSTRUM av600  
 PROBHD 5 mm CPBBO BB-  
 PULPROG zgpg30  
 TD 65536  
 SOLVENT CDCl3  
 NS 307  
 DS 4  
 SWH 36231.883 Hz  
 FIDRES 0.552855 Hz  
 AQ 0.9044468 sec  
 RG 2050  
 DW 13.800 usec  
 DE 19.63 usec  
 TE 298.1 K  
 D1 0.40000001 sec  
 D11 0.03000000 sec  
 TD0 1

\*\*\*\*\* CHANNEL f1 \*\*\*\*\*  
 SF01 150.9194080 MHz  
 NUC1 13C  
 P1 10.10 usec

F2 - Processing parameters  
 SI 65536  
 SF 150.9027986 MHz  
 WDW no  
 SSB 0  
 LB 0.00 Hz  
 GB 0  
 PC 1.00

1D NMR plot parameters  
 CX 22.80 cm  
 CY 15.00 cm  
 F1P 230.117 ppm  
 F1 34725.34 Hz  
 F2P -9.984 ppm  
 F2 -1506.54 Hz  
 PPMCM 10.53074 ppm/cm  
 HZCM 1589.11780 Hz/cm

<sup>1</sup>H spectrum

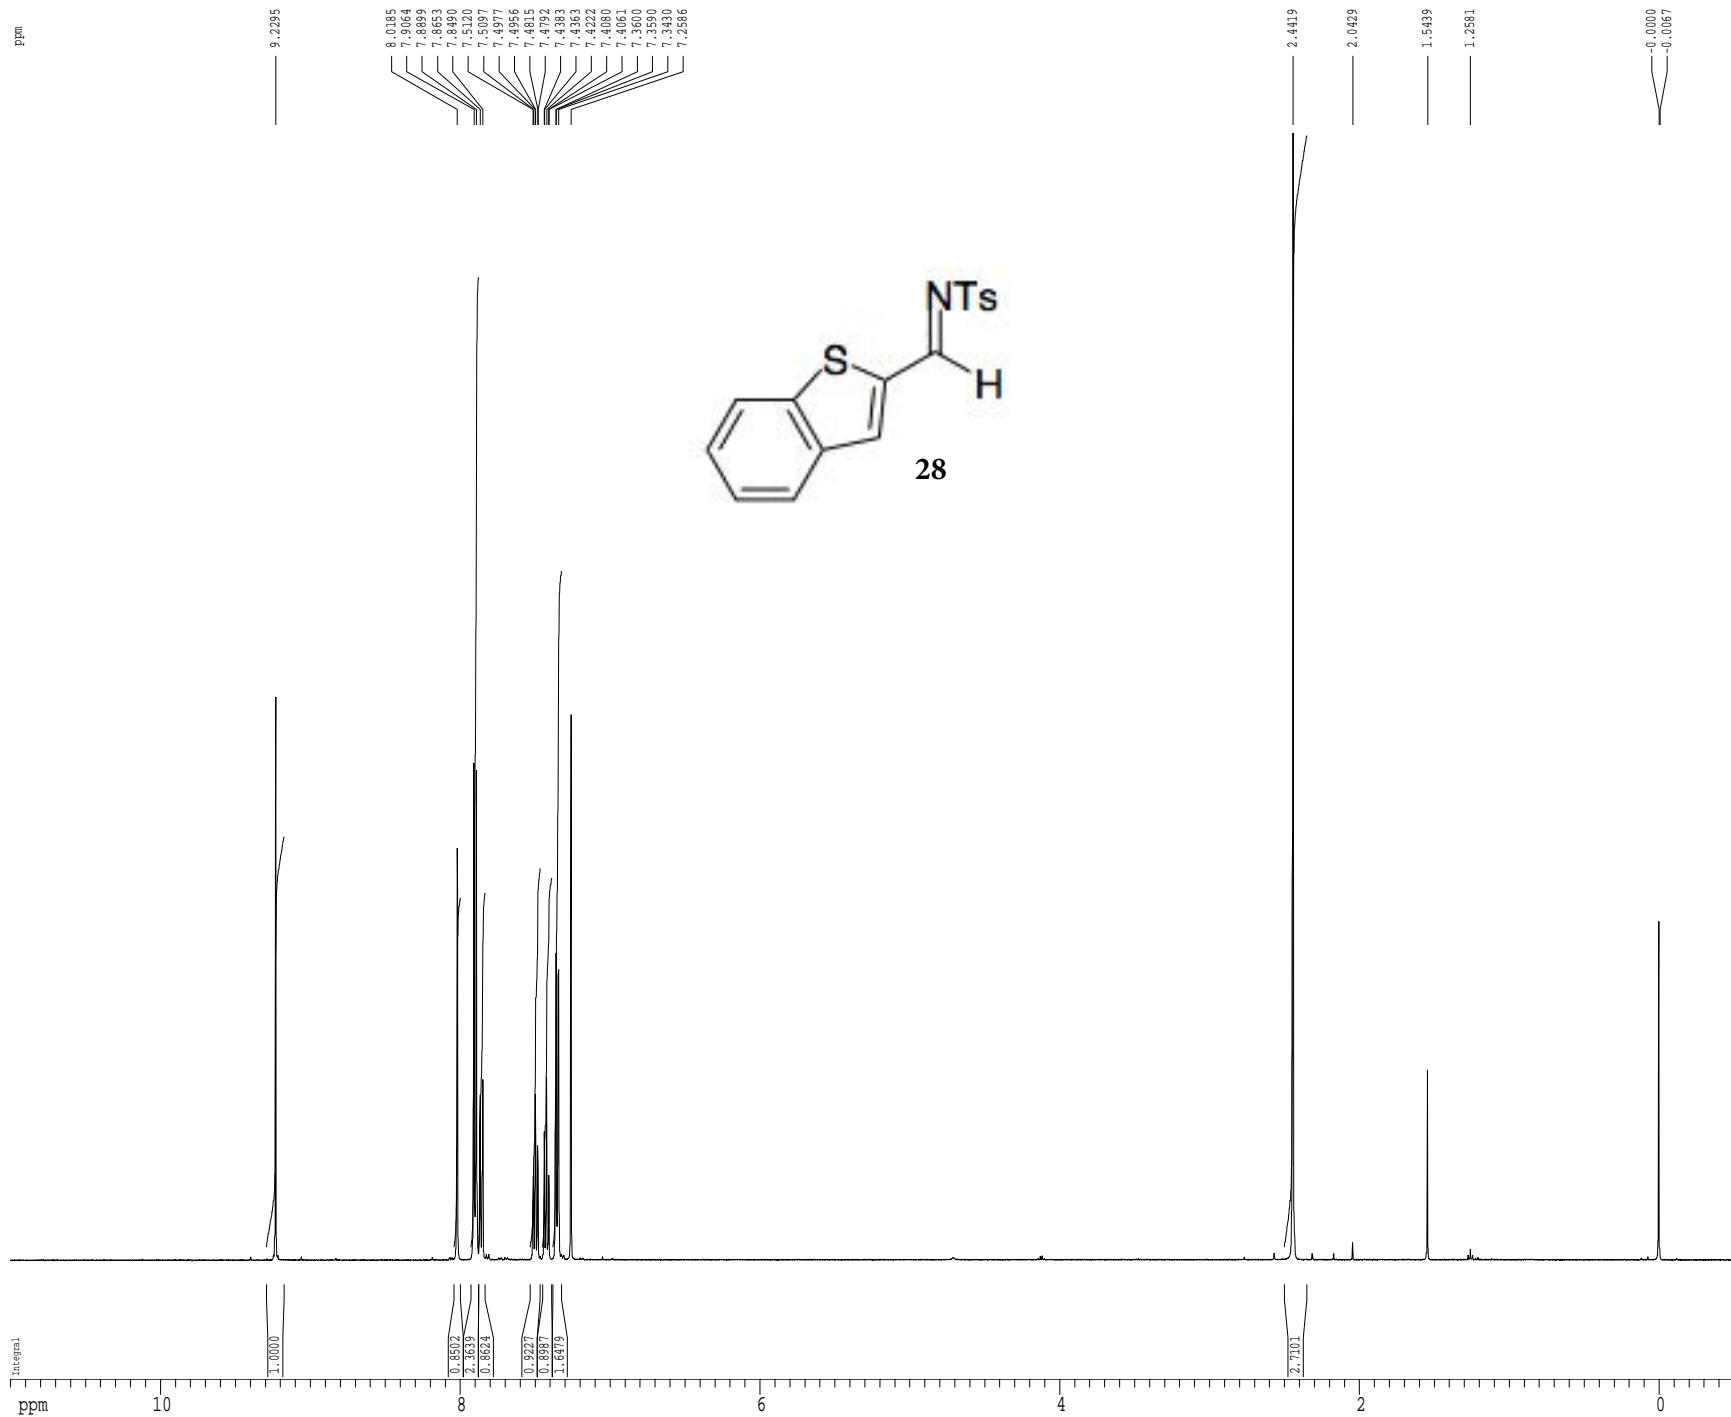

Current Data Parameters  
 USER khewitt1  
 NAME KAH-1-153-Z-2  
 EXPNO 1  
 PROCNO 1

F2 - Acquisition Parameters  
 Date\_ 20181110  
 Time 17.24  
 INSTRUM cryo500  
 PROBHD 5 mm CPTCI 1H-  
 PULPROG zg30  
 TD 48074  
 SOLVENT CDC13T  
 NS 8  
 DS 2  
 SWH 8012.820 Hz  
 FIDRES 0.166677 Hz  
 AQ 2.9998677 sec  
 RG 10.1  
 DW 62.400 usec  
 DE 6.00 usec  
 TE 298.0 K  
 D1 0.10000000 sec  
 MCREST 0.00000000 sec  
 MCWREK 0.01500000 sec

===== CHANNEL f1 =====  
 NUC1 1H  
 P1 7.50 usec  
 PL1 1.60 dB  
 SFO1 500.2235015 MHz

F2 - Processing parameters  
 SI 65536  
 SF 500.2200329 MHz  
 WDW no  
 SSB 0  
 LB 0.00 Hz  
 GB 0  
 PC 1.00

1D NMR plot parameters  
 CX 22.80 cm  
 CY 15.00 cm  
 F1P 11.000 ppm  
 F1 5502.42 Hz  
 F2P -0.500 ppm  
 F2 -250.11 Hz  
 PPMCM 0.50439 ppm/cm  
 HZCM 252.30397 Hz/cm

# Z-restored spin-echo 13C spectrum with 1H decoupling

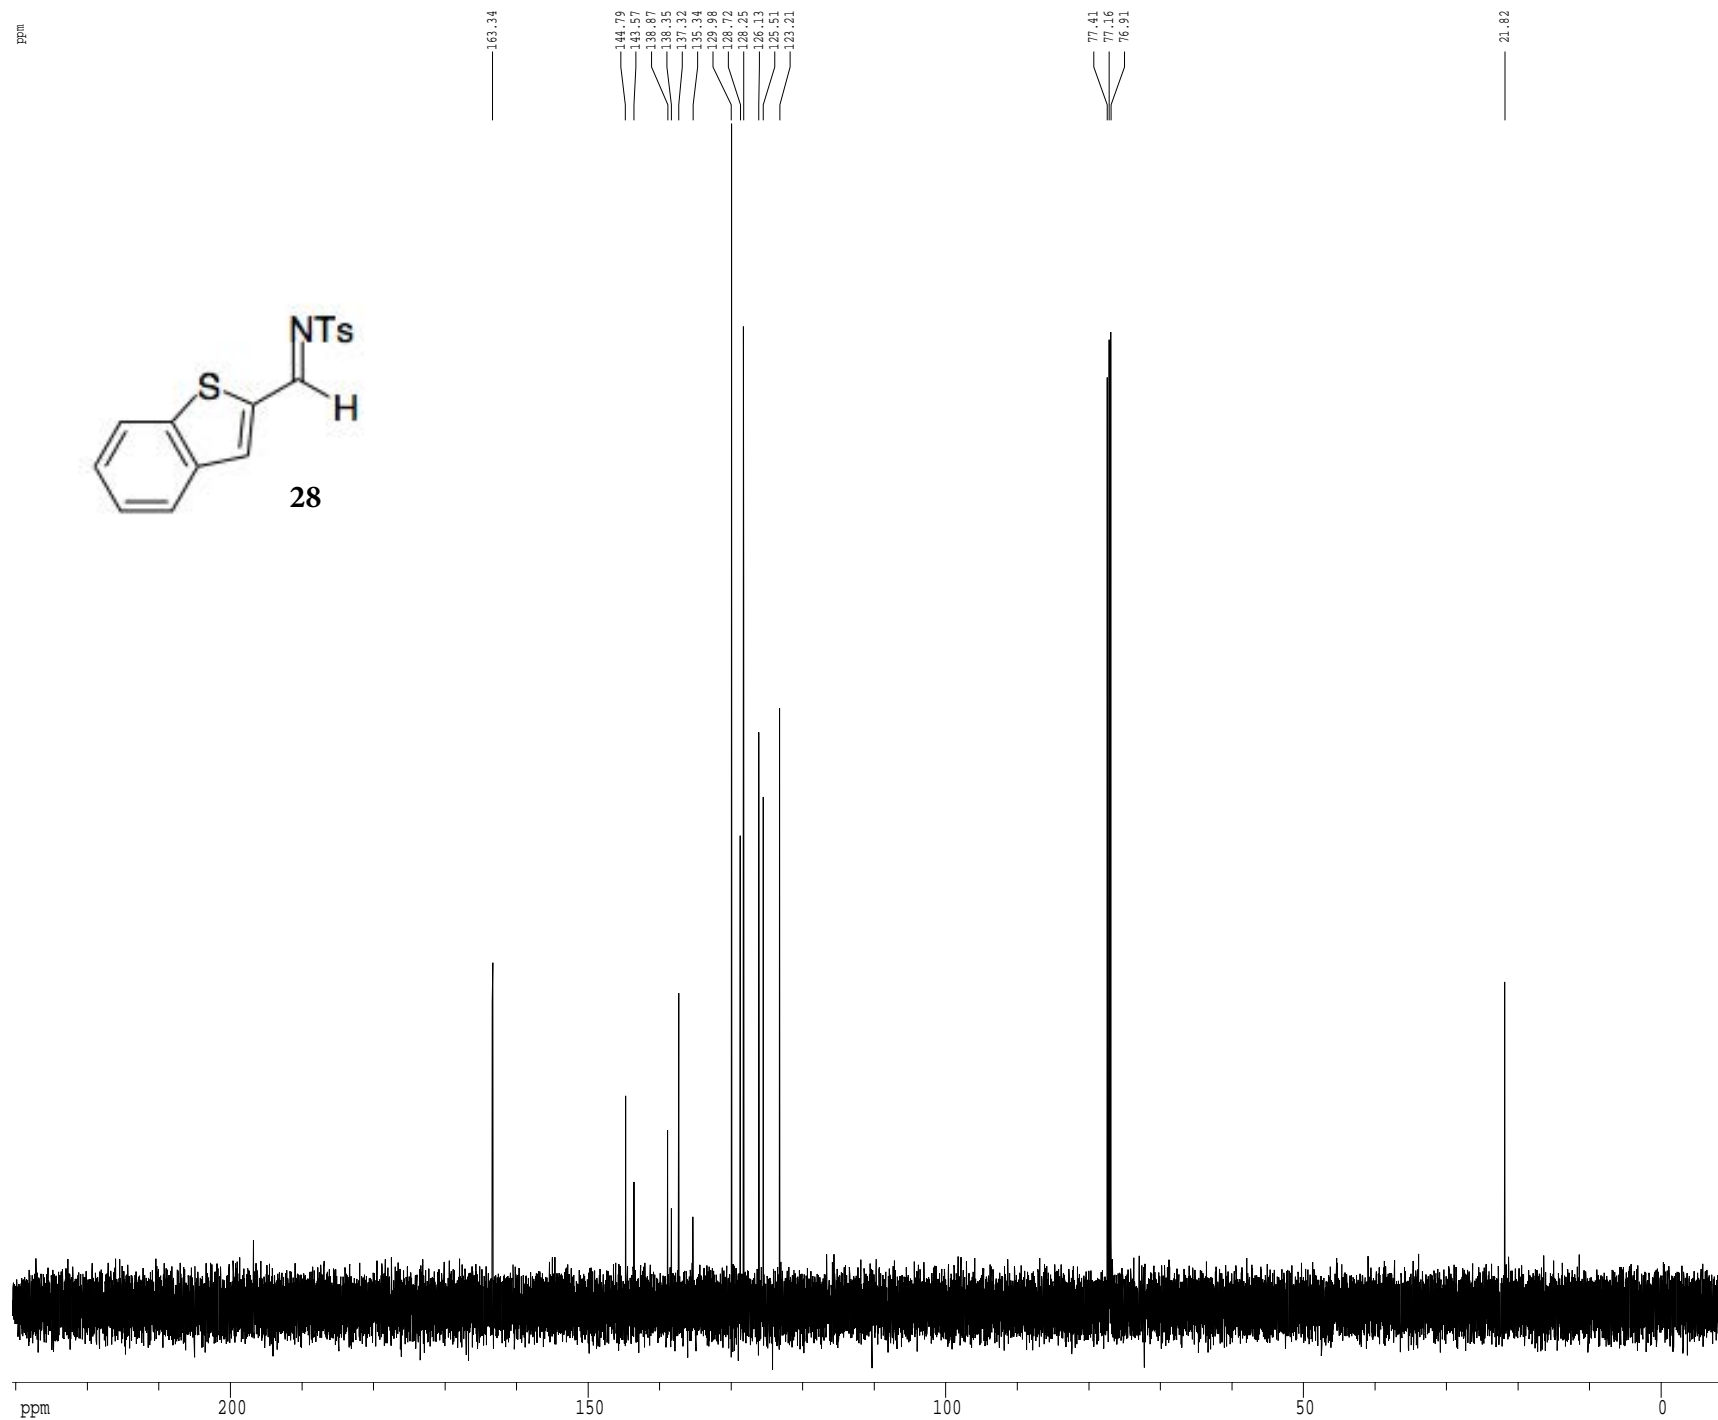

```

Current Data Parameters
USER      khewitt1
NAME      KAH-1-153-Z-2
EXPNO     2
PROCNO    1

F2 - Acquisition Parameters
Date_     20181110
Time      17.26
INSTRUM   cryo500
PROBHD    5 mm CPTCI 1H-
PULPROG   SpinEchopg30gp2.prd
TD        65536
SOLVENT   CDCl3
NS         154
DS         16
SWH        30303.031 Hz
FIDRES     0.462388 Hz
AQ         1.0813940 sec
RG         13004
DM         16.500 usec
DE         6.00 usec
TE         298.0 K
D1         0.25000000 sec
d11        0.03000000 sec
d16        0.00020000 sec
d17        0.00019600 sec
MCWREST    0.00000000 sec
MCWEXX     0.01500000 sec
P2         33.10 usec

===== CHANNEL f1 =====
NUC1       13C
P1         16.55 usec
P12        2000.00 usec
P20        500.00 usec
PL0        120.00 dB
PL1        -1.00 dB
SFO1       125.7942548 MHz
SP2        2.70 dB
SP4        2.70 dB
SPNAM2     Crp60comp.4
SPNAM4     Crp60,0.5,20.1
SPOFF2     0.00 Hz
SPOFF4     0.00 Hz

===== CHANNEL f2 =====
CPDPRG2    waltz16
NUC2       1H
PCPD2      100.00 usec
PL2        1.60 dB
PL12       23.54 dB
SFO2       500.2225011 MHz

===== GRADIENT CHANNEL =====
GPNAM1     SINE.100
GPNAM2     SINE.100
GPX1       0.00 %
GPX2       0.00 %
GPY1       0.00 %
GPY2       0.00 %
GPZ1       30.00 %
GPZ2       50.00 %
p15        500.00 usec
p16        1000.00 usec

F2 - Processing parameters
SI         65536
SF         125.7804071 MHz
WDW        no
SSB        0
LB         0.00 Hz
GB         0
PC         1.50

1D NMR plot parameters
CX         22.80 cm
CY         15.65 cm
F1P        230.460 ppm
F1         28987.37 Hz
F1P2       -10.460 ppm
F2         -1315.66 Hz
PPMCM      10.56667 ppm/cm
HZCM       1329.08020 Hz/cm
    
```

<sup>1</sup>H spectrum

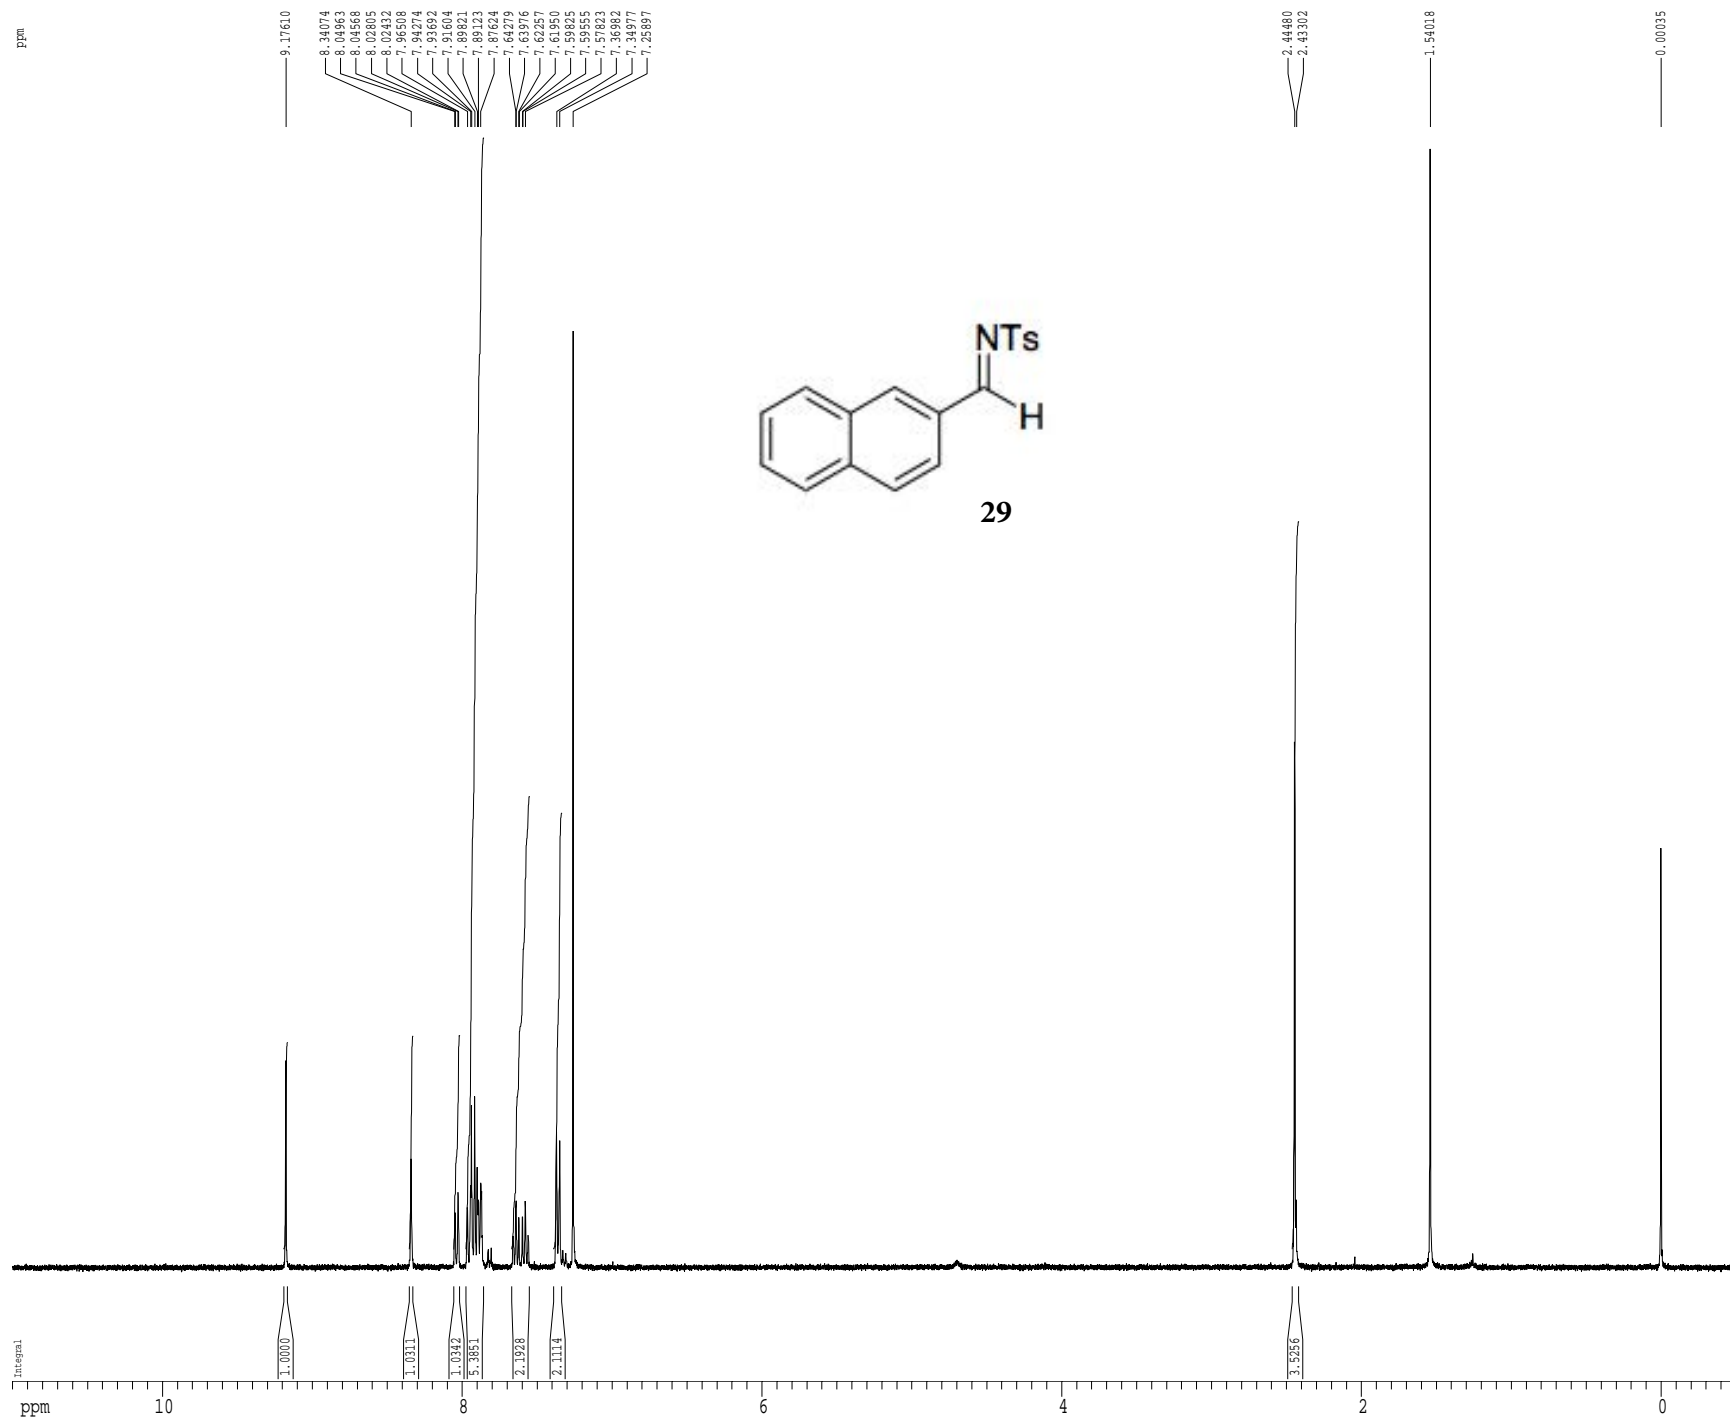

Current Data Parameters  
 USER khewitt1  
 NAME CAH-I-219  
 EXPNO 2  
 PROCNO 1

F2 - Acquisition Parameters  
 Date\_ 20210506  
 Time 9.54  
 INSTRUM drx400  
 PROBHD 5 mm QNP H/P/P  
 PULPROG zg30  
 TD 65536  
 SOLVENT CDCl3  
 NS 8  
 DS 2  
 SWH 6410.256 Hz  
 FIDRES 0.097813 Hz  
 AQ 5.1118579 sec  
 RG 1149.4  
 DW 78.000 usec  
 DE 4.50 usec  
 TE 298.0 K  
 D1 0.10000000 sec  
 MCREST 0.00000000 sec  
 MCWREK 0.01500000 sec

===== CHANNEL f1 =====  
 NUC1 1H  
 P1 12.00 usec  
 PL1 -1.60 dB  
 SF01 400.1328009 MHz

F2 - Processing parameters  
 SI 65536  
 SF 400.1300220 MHz  
 WDW no  
 SSB 0  
 LB 0.00 Hz  
 GB 0  
 PC 2.00

1D NMR plot parameters  
 CX 22.80 cm  
 CY 15.00 cm  
 F1P 11.000 ppm  
 F1 4401.43 Hz  
 F2P -0.500 ppm  
 F2 -200.07 Hz  
 PPMCM 0.50439 ppm/cm  
 HZCM 201.81998 Hz/cm

<sup>1</sup>H spectrum

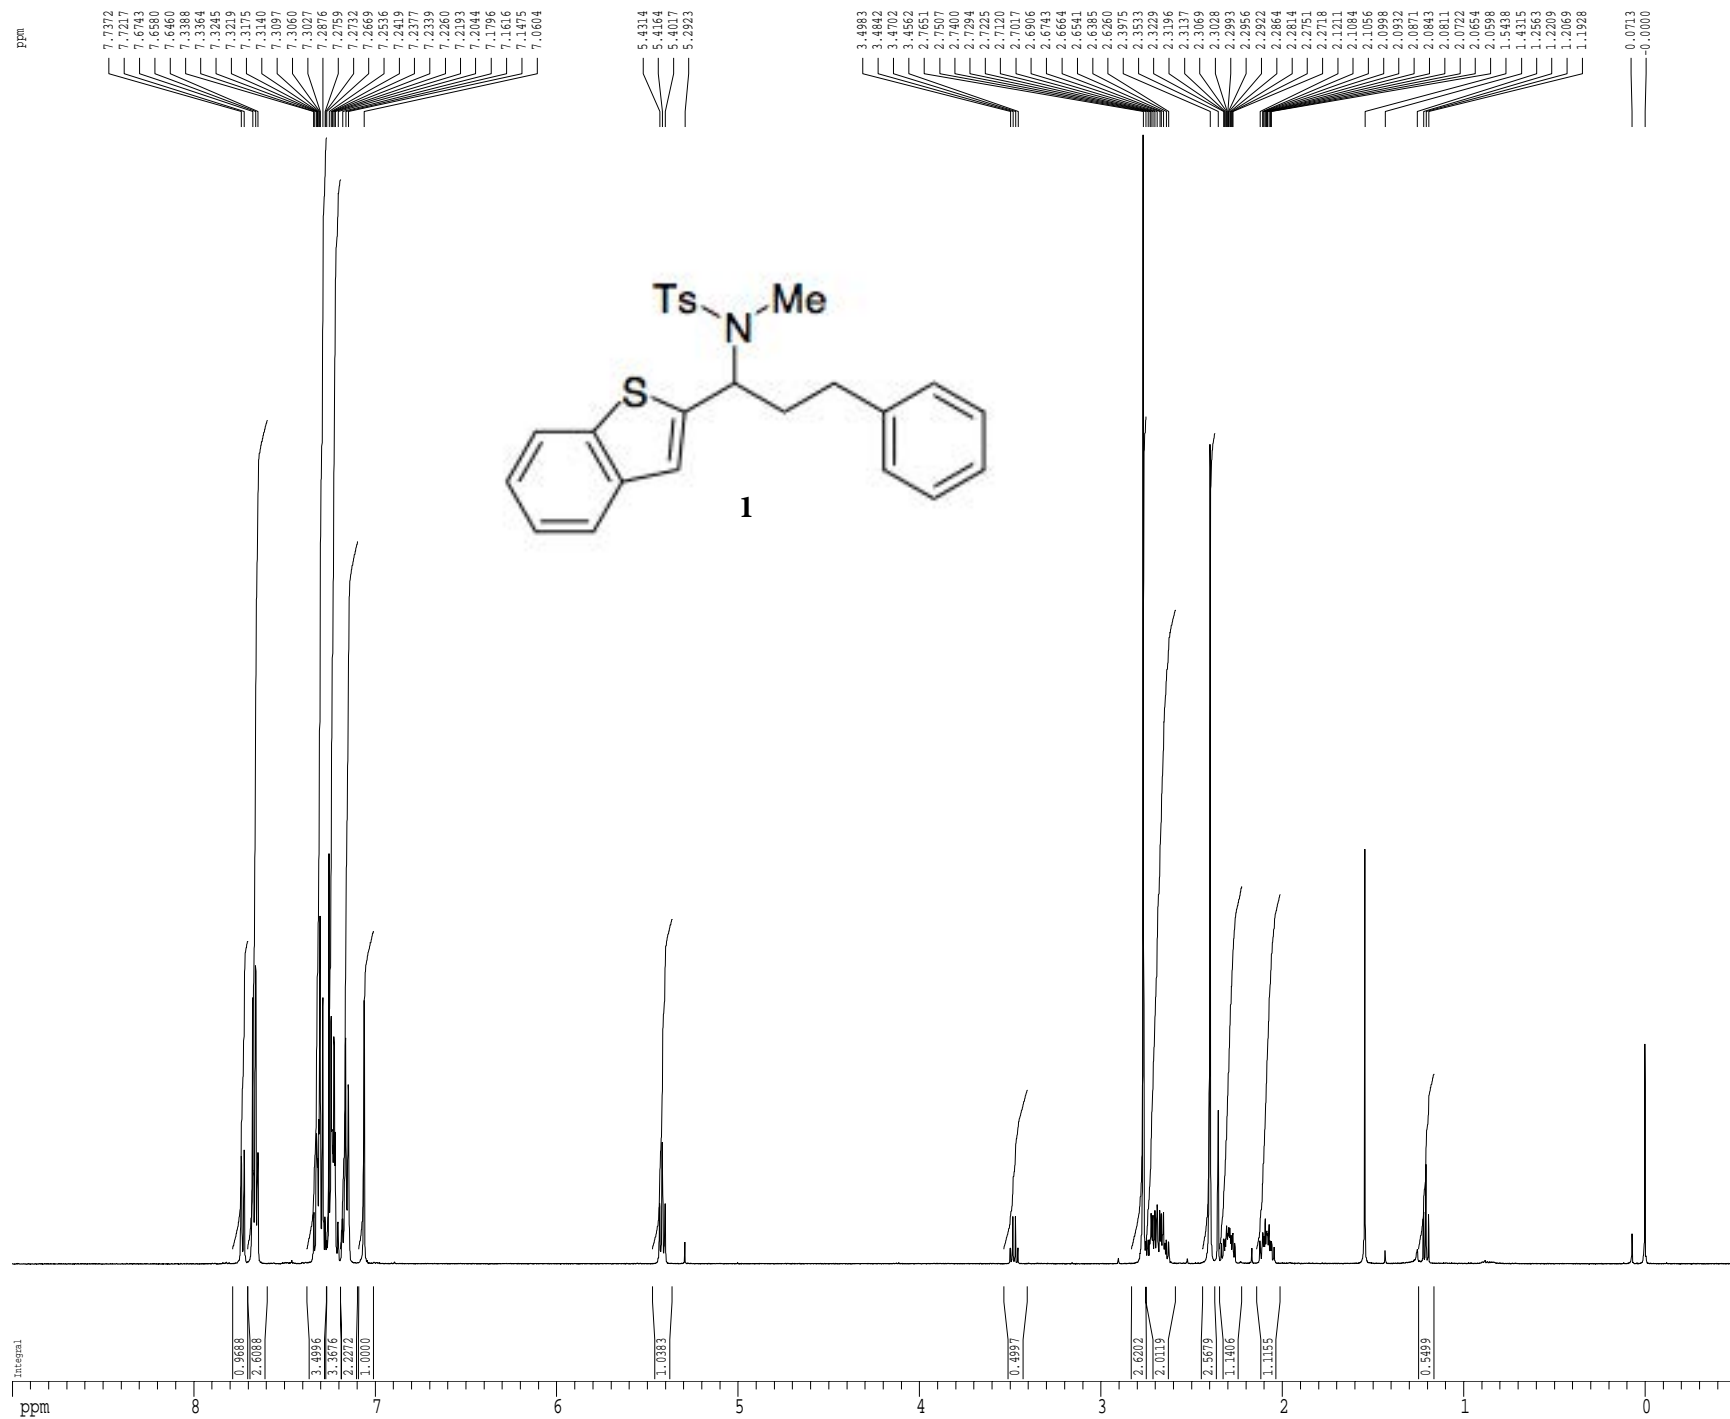

Current Data Parameters  
 USER khewitt1  
 NAME KAH-1-172-Z  
 EXPNO 1  
 PROCNO 1

F2 - Acquisition Parameters  
 Date\_ 20181107  
 Time 21.08  
 INSTRUM cryo500  
 PROBHD 5 mm CPTCI 1H-  
 PULPROG zg30  
 TD 48074  
 SOLVENT CDCl3  
 NS 8  
 DS 2  
 SWH 8012.820 Hz  
 FIDRES 0.166677 Hz  
 AQ 2.9998677 sec  
 RG 9  
 DW 62.400 usec  
 DE 6.00 usec  
 TE 298.0 K  
 D1 0.10000000 sec  
 MCREST 0.00000000 sec  
 MCNRK 0.01500000 sec

===== CHANNEL f1 =====  
 NUC1 1H  
 P1 7.50 usec  
 PL1 1.60 dB  
 SFO1 500.2235015 MHz

F2 - Processing parameters  
 SI 65536  
 SF 500.2200355 MHz  
 WDW no  
 SSB 0  
 LB 0.00 Hz  
 GB 0  
 PC 1.00

1D NMR plot parameters  
 CY 22.80 cm  
 CY 15.00 cm  
 F1P 9.000 ppm  
 F1 4501.98 Hz  
 F2P -0.500 ppm  
 F2 -250.11 Hz  
 PPMCM 0.41667 ppm/cm  
 HZCM 208.42502 Hz/cm



# Z-restored spin-echo 13C spectrum with 1H decoupling

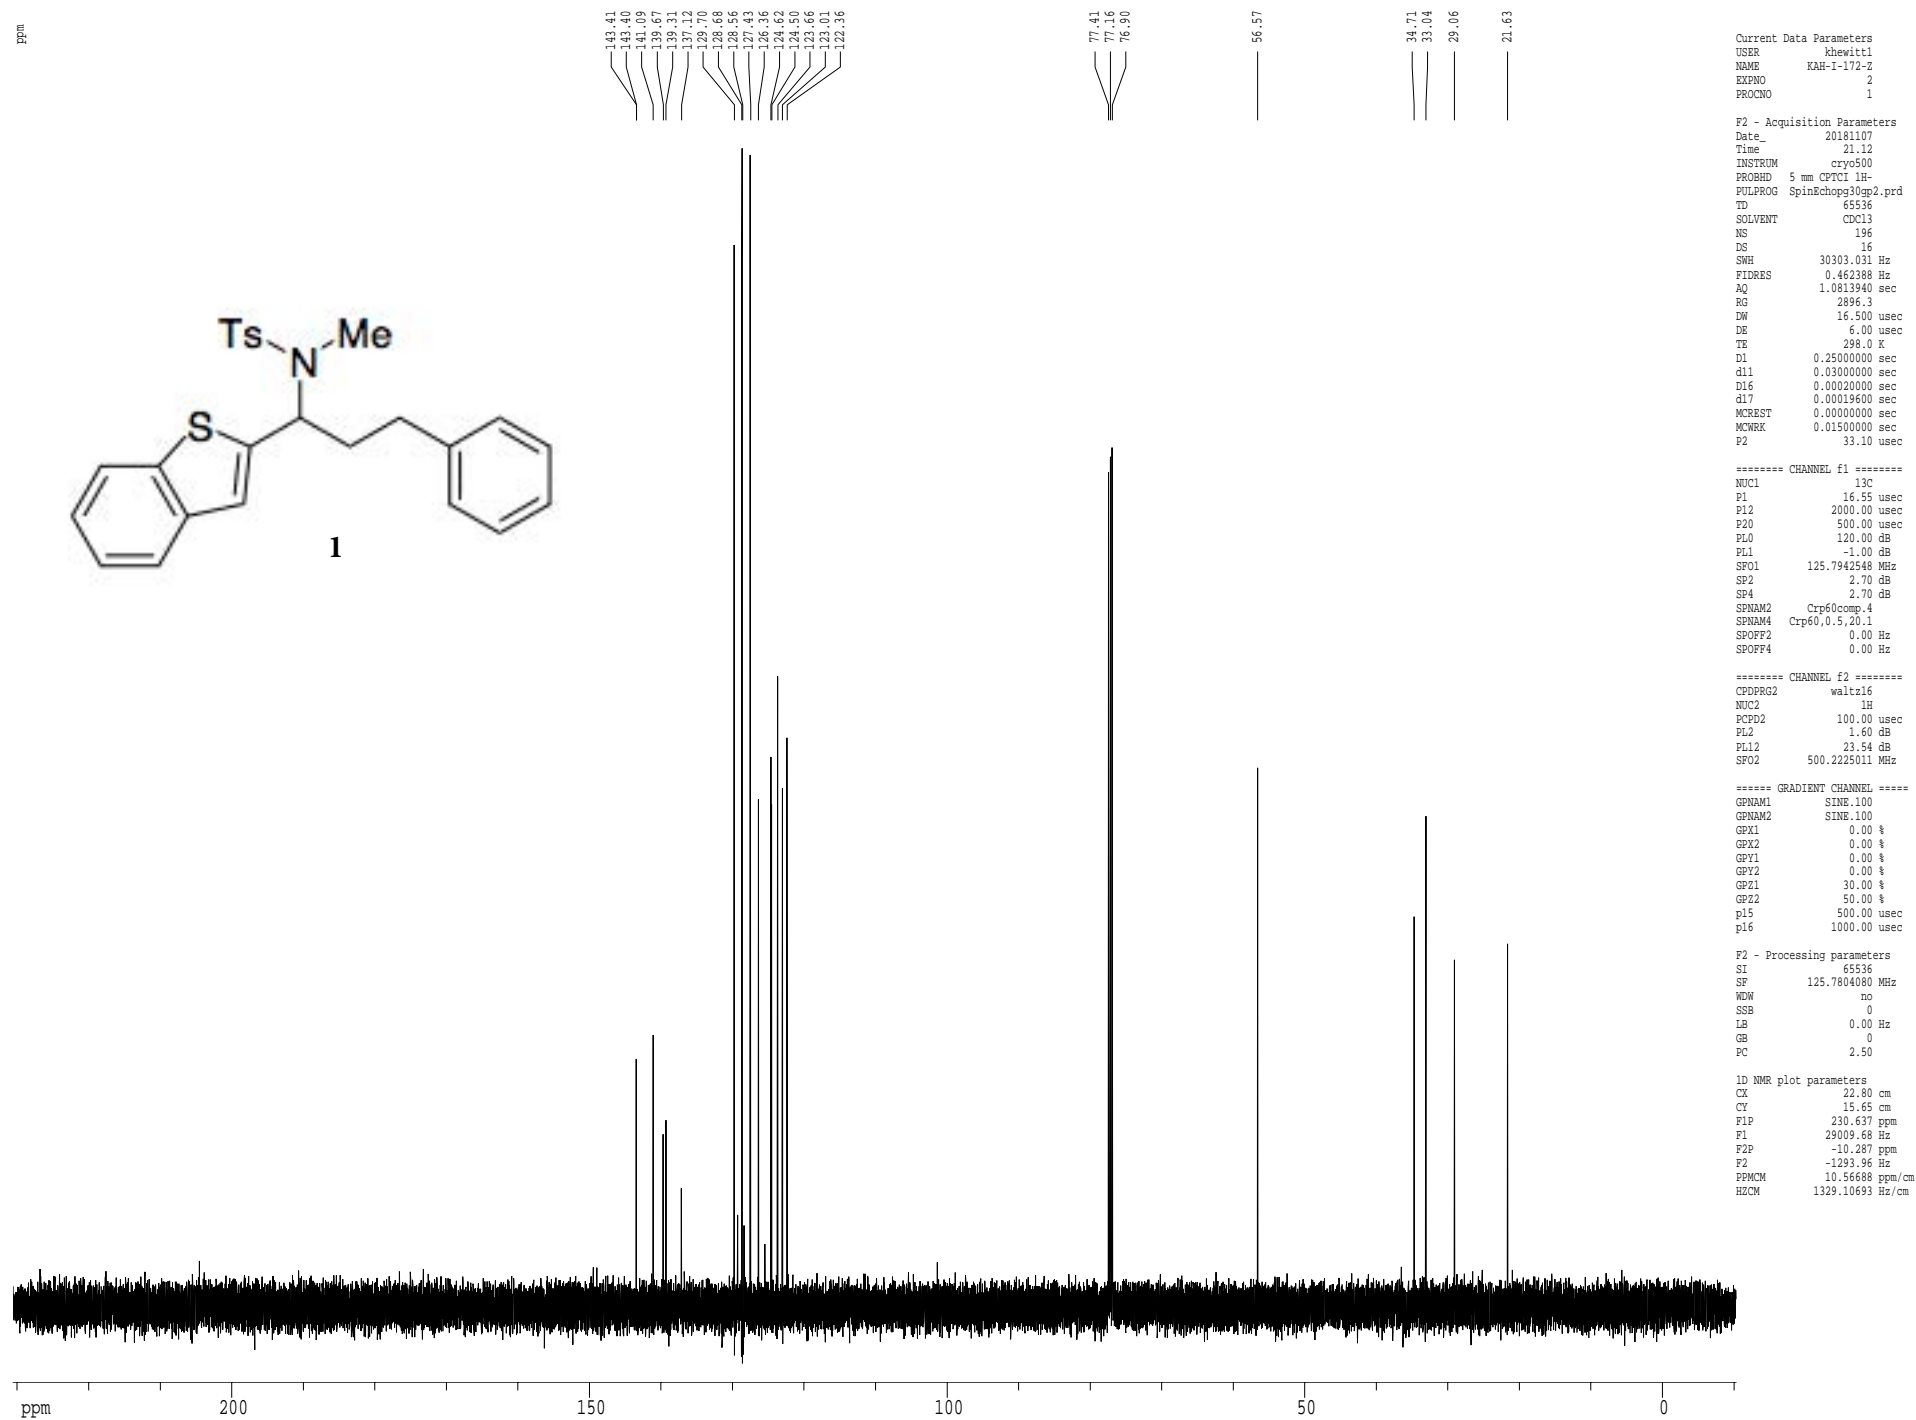

Figure 10: A plot of the eigenvalues of the matrix  $\mathbf{A}$  for the case  $\alpha = 0.5$ . The eigenvalues are arranged in descending order of magnitude. The plot shows a large number of eigenvalues, with the first few being significantly larger than the rest. The eigenvalues are labeled with their corresponding index  $k$  on the x-axis, ranging from 1 to 100. The y-axis represents the eigenvalue magnitude, ranging from 0 to 1000. The eigenvalues are labeled with their corresponding index  $k$  on the x-axis, ranging from 1 to 100. The y-axis represents the eigenvalue magnitude, ranging from 0 to 1000.

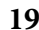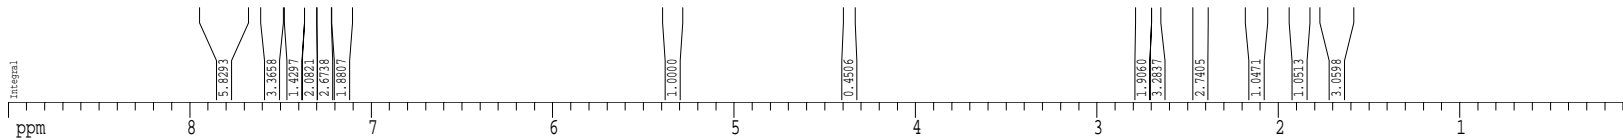

```

Current Data Parameters
USER                    khewitt1
NAME                   AM-I-046-Z
EXPNO                  1
PROCNO                 1

F2 - Acquisition Parameters
Date_                  20210809
Time                   18.13
INSTRUM                cryo500
PROBHD                 5 mm CPTCI 1H-
PULPROG                zg30
TD                     48074
SOLVENT                CDCl3
NS                      8
DS                      2
SWH                     8012.820 Hz
FIDRES                 0.16667 Hz
AQ                     2.9998677 sec
RG                      5
DW                     62.400 usec
DE                     6.00 usec
TE                     298.0 K
D1                     0.10000000 sec
MCREST                 0.00000000 sec
MCWRK                  0.01500000 sec

===== CHANNEL f1 =====
NUC1                    1H
P1                      9.75 usec
P11                     1.60 dB
SFO1                   500.223015 MHz

F2 - Processing parameters
SI                      65536
SF                     500.220000 MHz
WDW                     no
SSB                     0
LB                      0.00 Hz
GB                      0
PC                      1.00

1D 1HWR plot parameters
CX                      22.80 cm
CY                      15.00 cm
F1P                     9.000 ppm
F1                      4501.98 Hz
F2P                     -0.500 ppm
F2                      -250.11 Hz
PFMCM                  0.41667 ppm/cm
HZCM                   208.42500 Hz/cm

```

# Z-restored spin-echo 13C spectrum with 1H decoupling

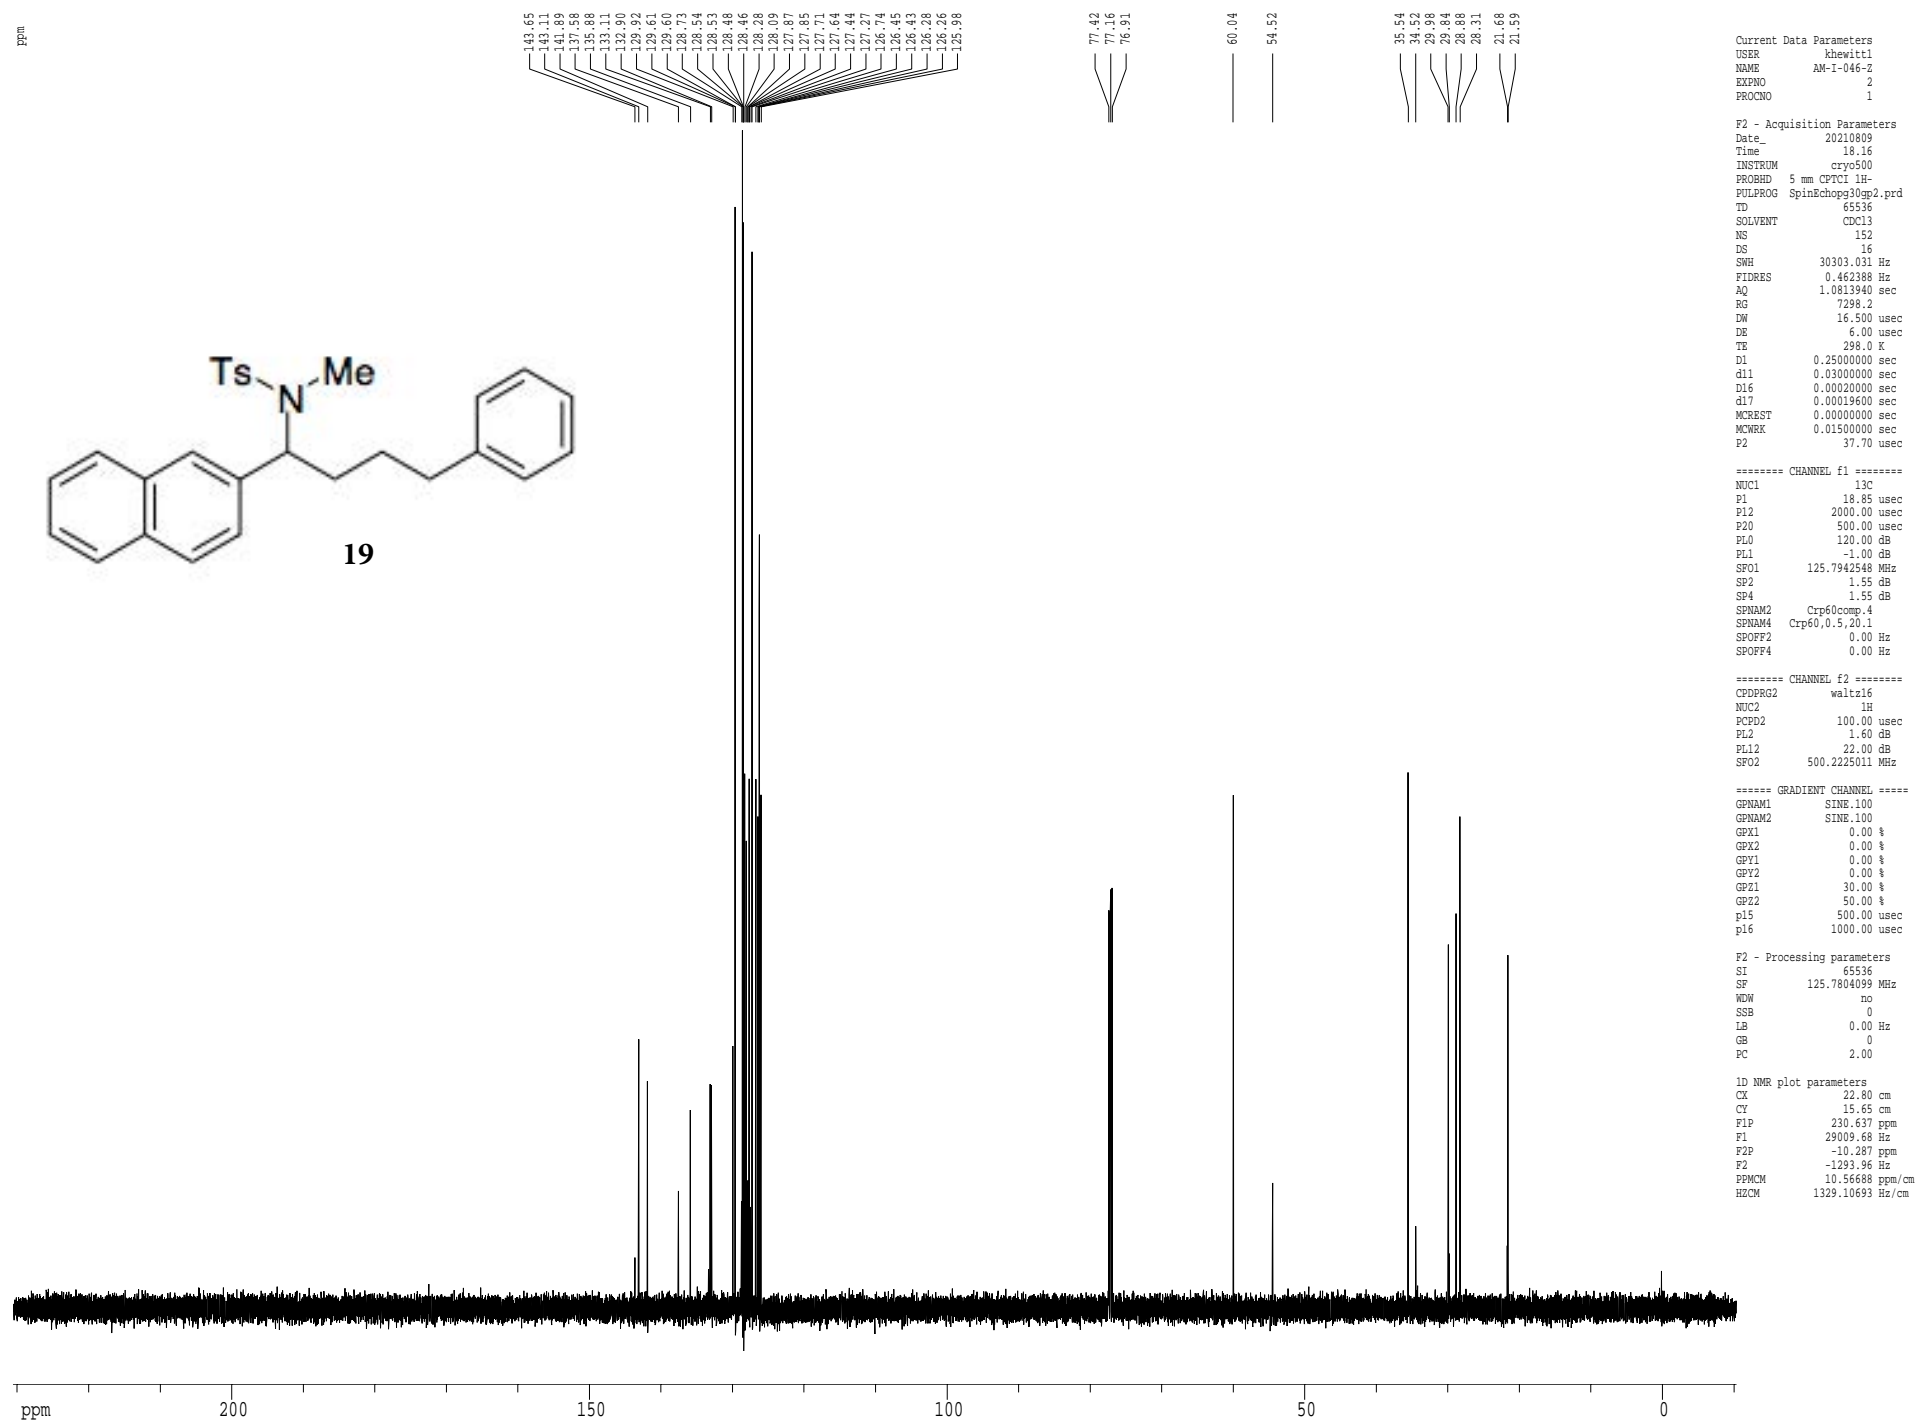

<sup>1</sup>H spectrum

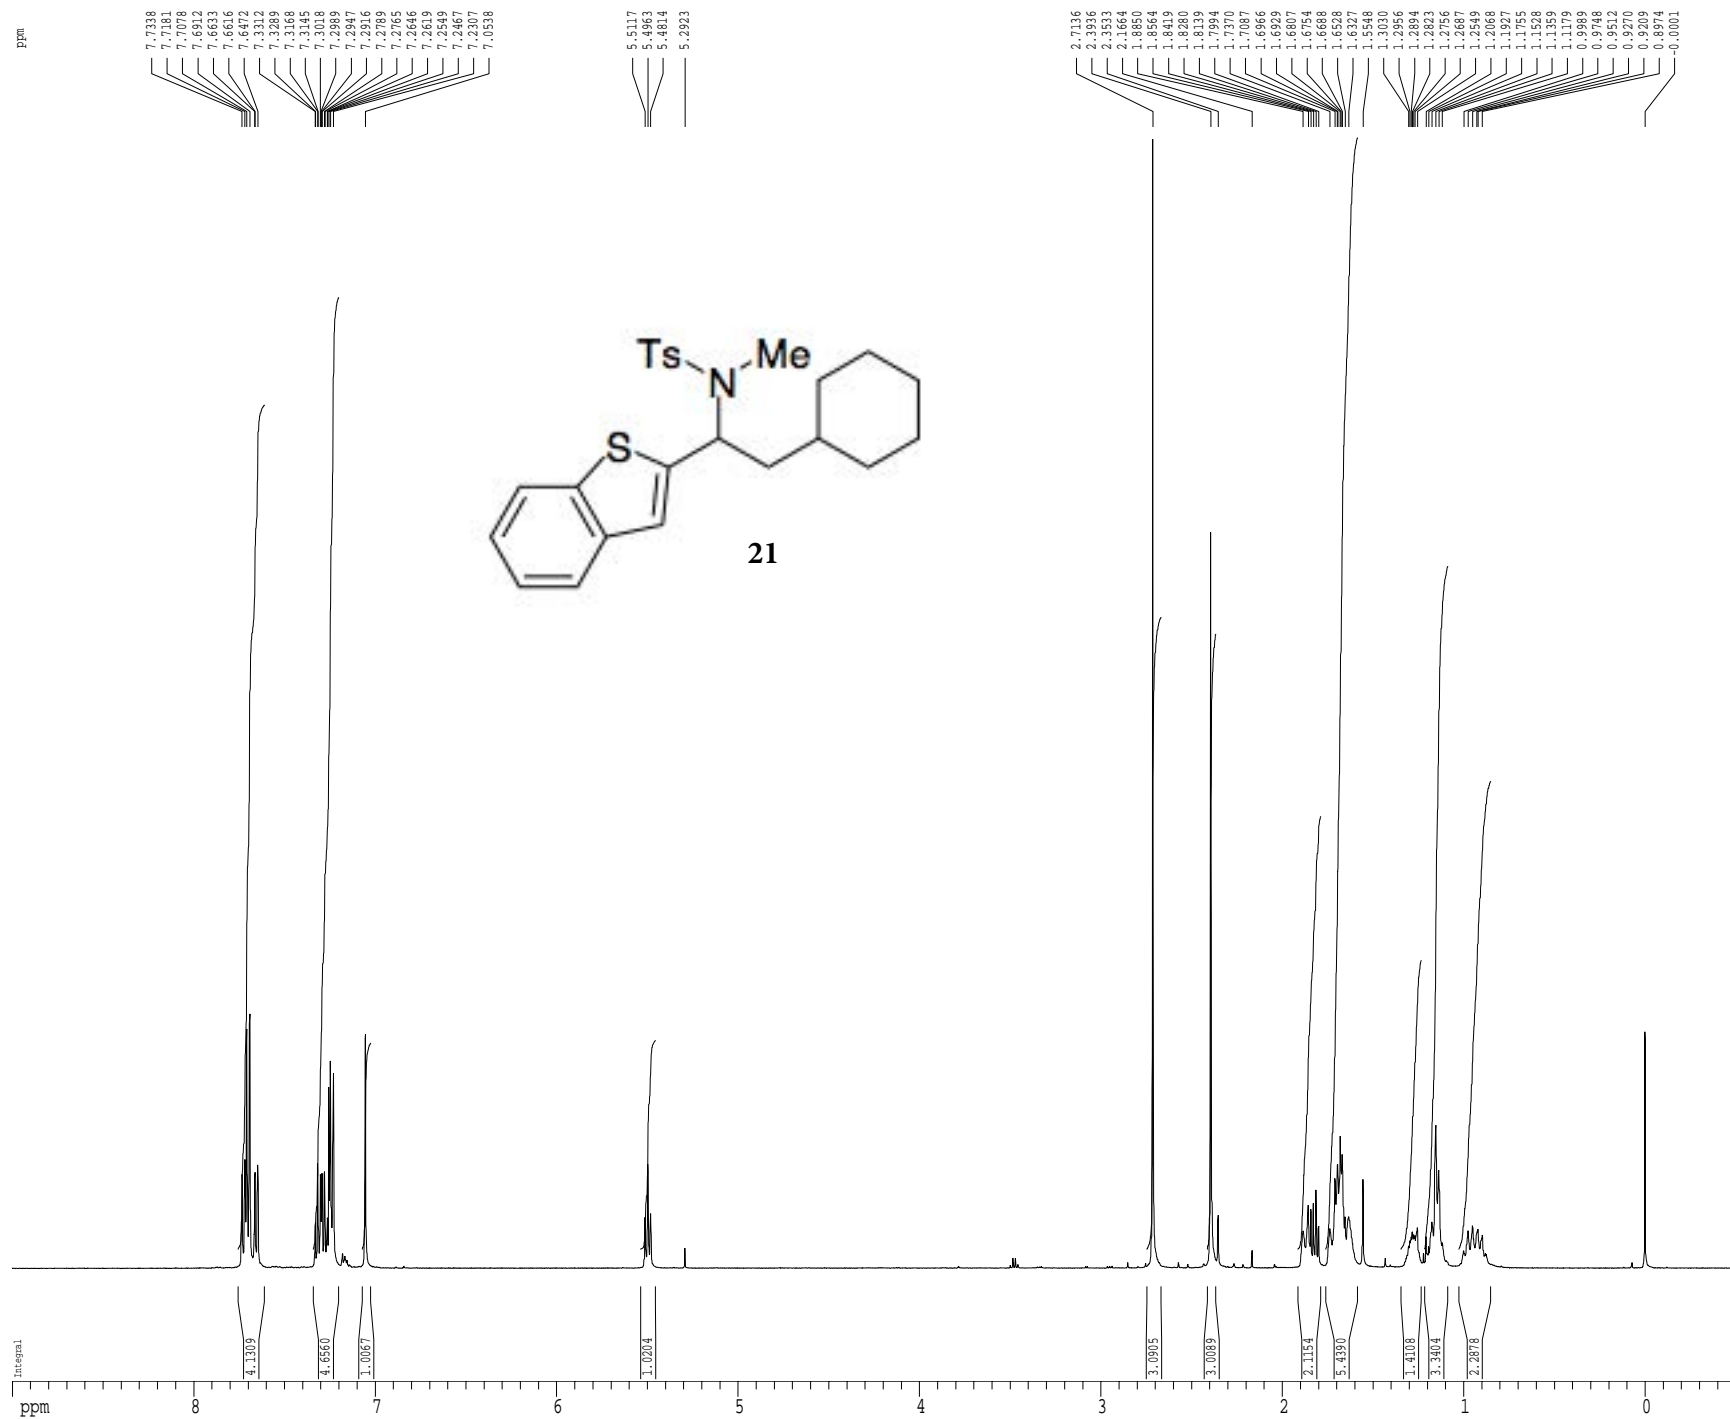

Current Data Parameters  
 USER khewitt1  
 NAME ACM-I-120-benzCH  
 EXPNO 1  
 PROCNO 1

F2 - Acquisition Parameters  
 Date\_ 20191112  
 Time 9.06  
 INSTRUM gn500  
 PROBHD 5 mm broadband  
 PULPROG zg30  
 TD 81728  
 SOLVENT CDC13T  
 NS 10  
 DS 2  
 SWH 8012.820 Hz  
 FIDRES 0.098043 Hz  
 AQ 5.0998774 sec  
 RG 181  
 DW 62.400 usec  
 DE 6.00 usec  
 TE 298.0 K  
 D1 0.10000000 sec  
 MCREST 0.00000000 sec  
 MCWRE 0.01500000 sec

===== CHANNEL f1 =====  
 NUC1 1H  
 P1 12.00 usec  
 PL1 -5.00 dB  
 SFO1 498.8534919 MHz

F2 - Processing parameters  
 SI 65536  
 SF 498.8500296 MHz  
 WDW EM  
 SSB 0  
 LB 0.30 Hz  
 GB 0  
 PC 1.00

1D NMR plot parameters  
 CY 22.80 cm  
 CY 15.00 cm  
 F1P 9.000 ppm  
 F1 4489.65 Hz  
 F2P -0.500 ppm  
 F2 -249.42 Hz  
 PPMCM 0.41667 ppm/cm  
 HZCM 207.85419 Hz/cm

# <sup>13</sup>C spectrum with <sup>1</sup>H decoupling

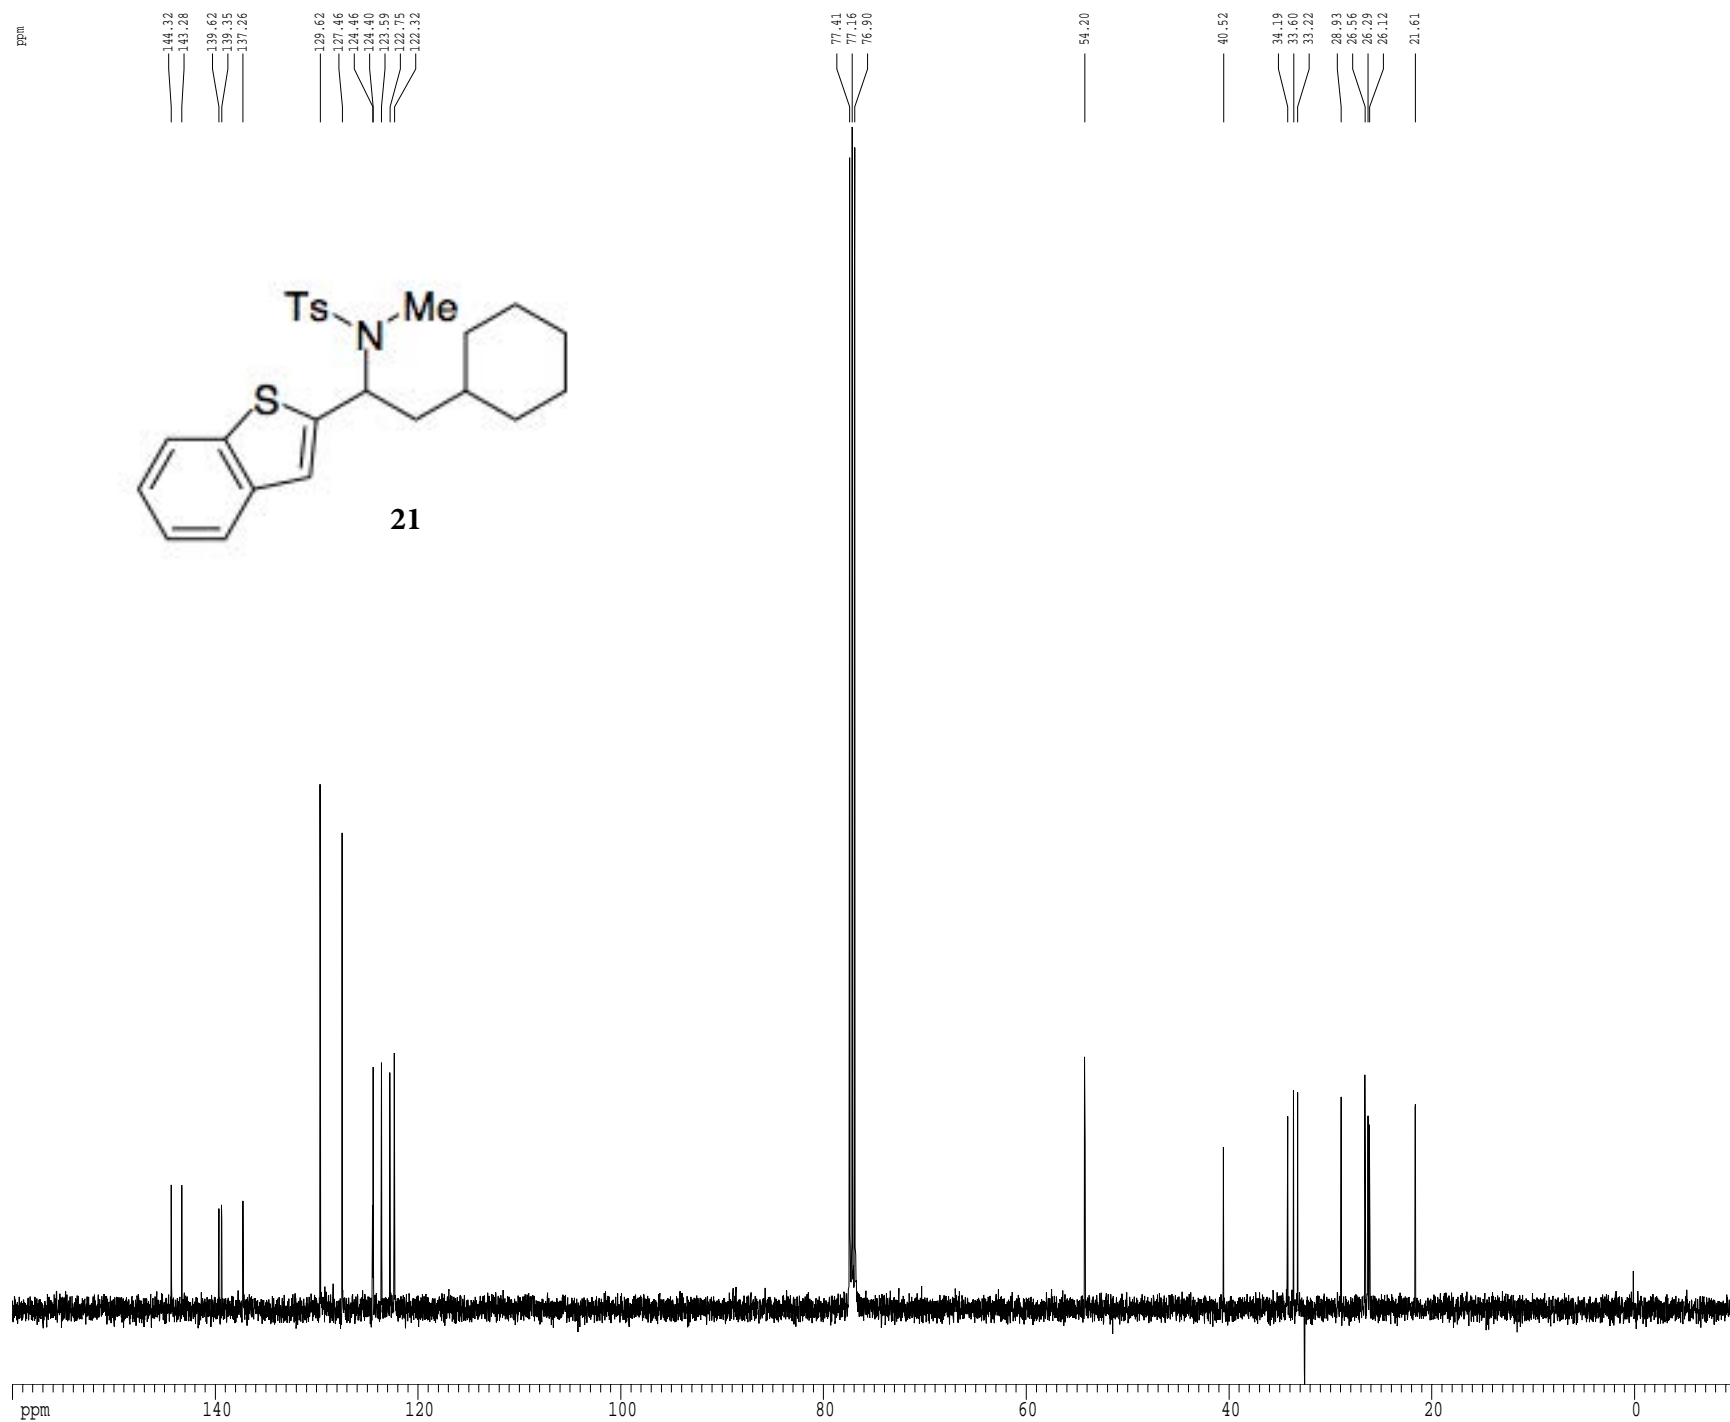

```

Current Data Parameters
USER      khewitt1
NAME      ACM-I-120-benzCH
EXPNO     2
PROCNO    1

F2 - Acquisition Parameters
Date_     20191112
Time      9.07
INSTRUM   gn500
PROBHD    5 mm broadband
PULPROG   zgdc30
TD        65536
SOLVENT   CDCl3
NS        544
DS        4
SWH        30303.031 Hz
FIDRES     0.462388 Hz
AQ         1.0813940 sec
RG         46341
DW         16.500 usec
DE         4.50 usec
TE         298.0 K
D1         0.25000000 sec
d11        0.03000000 sec
MCREST    0.00000000 sec
MCWRK     0.01500000 sec

===== CHANNEL f1 =====
NUC1       13C
P1         10.00 usec
PL1        -6.00 dB
SFO1       125.4497300 MHz

===== CHANNEL f2 =====
CPDPRG2    waltz16
NUC2       1H
PCPD2      80.00 usec
PL2        -5.00 dB
PL12       13.20 dB
SFO2       498.8524943 MHz

F2 - Processing parameters
SI         65536
SF         125.4359203 MHz
WDW        BM
SSB        0
LB         1.00 Hz
GB         0
PC         2.00

1D NMR plot parameters
CX         22.80 cm
CY         15.65 cm
F1P        160.000 ppm
F1         20069.75 Hz
F2P        -10.000 ppm
F2         -1254.36 Hz
PPMCM      7.45614 ppm/cm
HZCM       935.26788 Hz/cm
    
```

<sup>1</sup>H spectrum

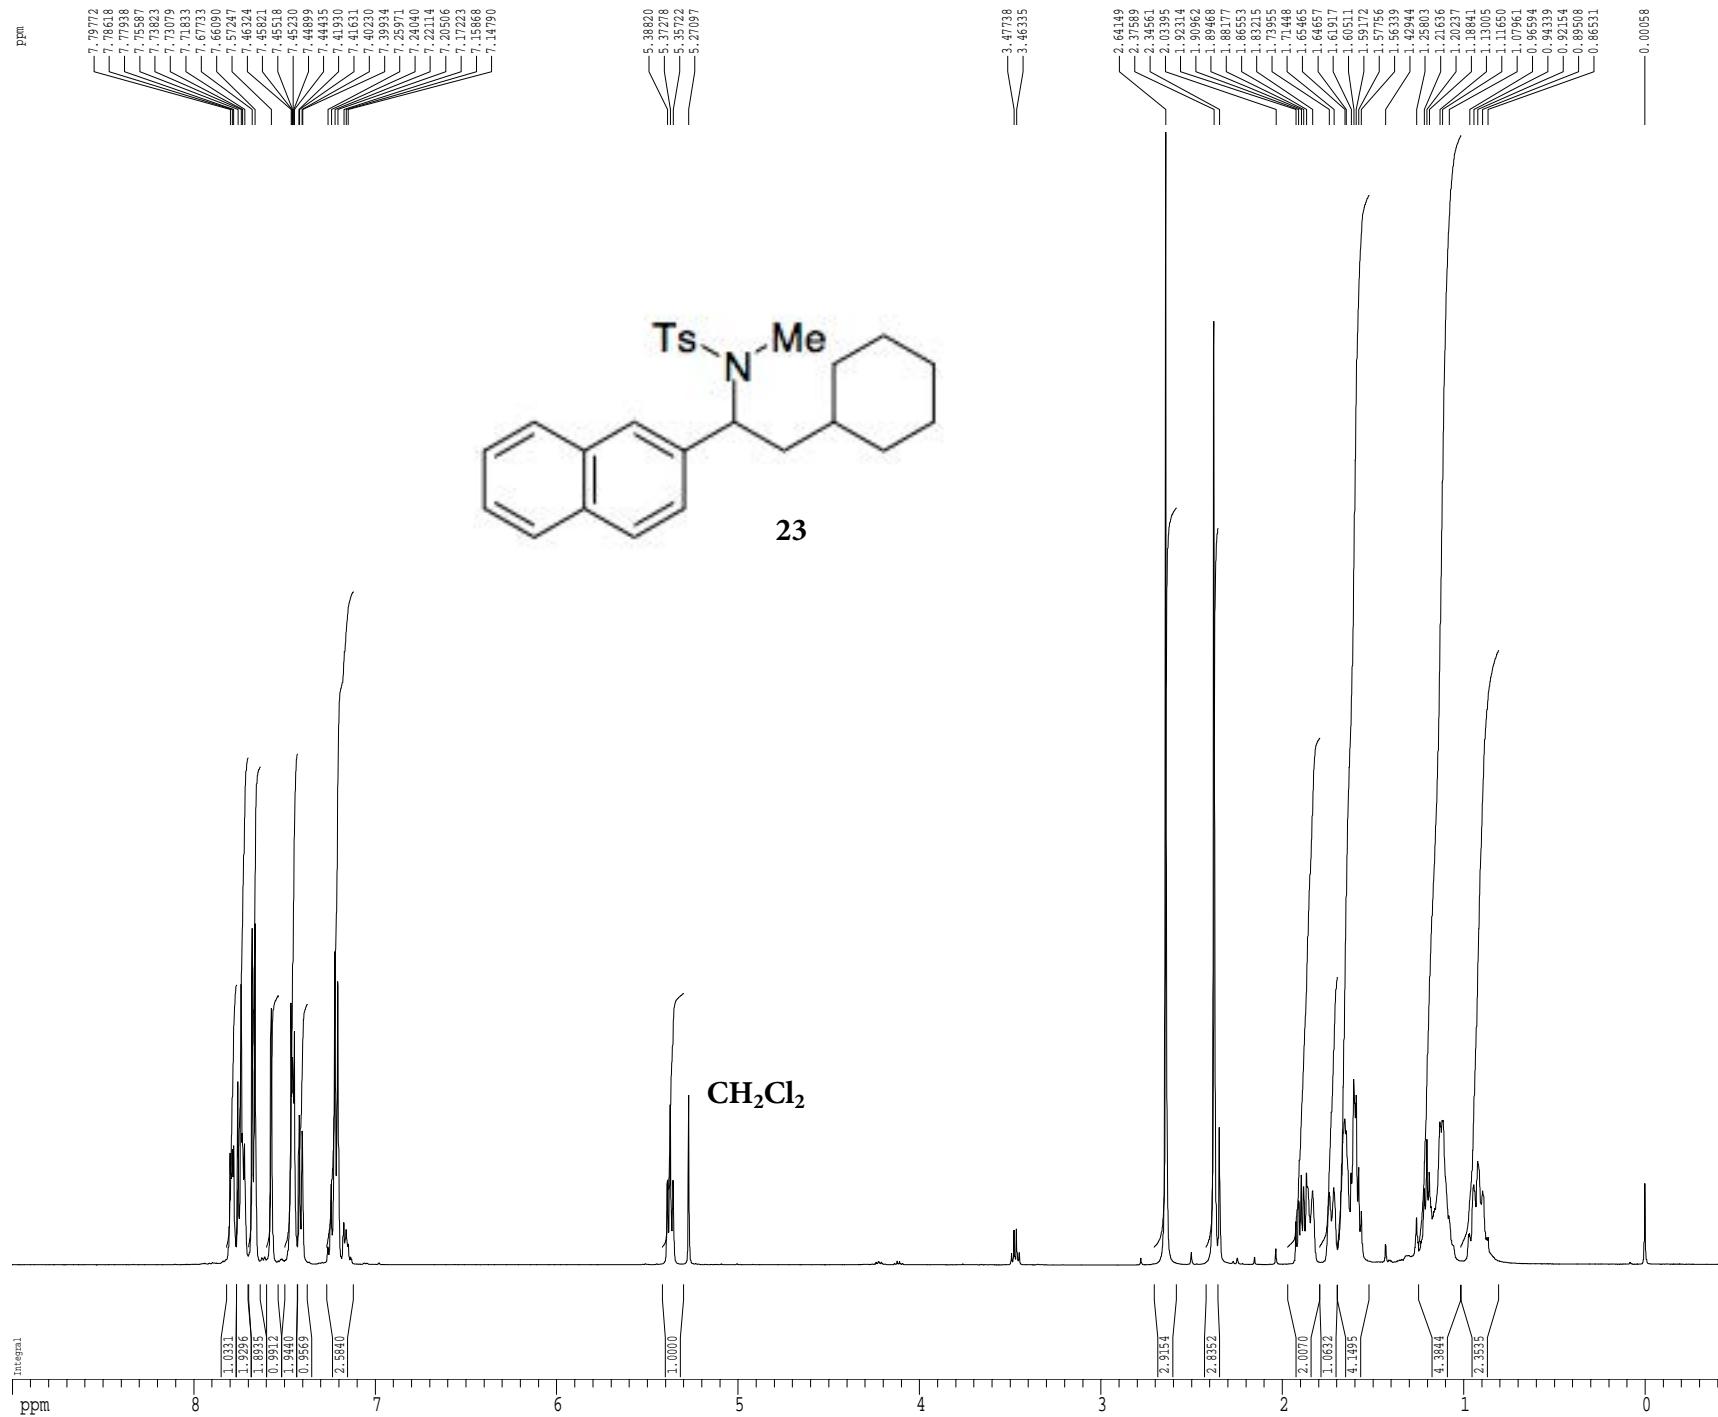

```

Current Data Parameters
USER      khewitt1
NAME      ACM-I-120nap-CH
EXPNO     1
PROCNO    1

F2 - Acquisition Parameters
Date_     20191112
Time      9.24
INSTRUM   cryo500
PROBHD    5 mm CPTCI 1H-
PULPROG   zg30
TD         81728
SOLVENT   CDCl3T
NS         10
DS         2
SWH        8012.820 Hz
FIDRES     0.098043 Hz
AQ          5.0998774 sec
RG          5
DW          62.400 usec
DE          6.00 usec
TE          298.2 K
D1          0.10000000 sec
MCREST     0.00000000 sec
MCWRR      0.01500000 sec

===== CHANNEL f1 =====
NUC1       1H
P1         7.50 usec
PL1        1.60 dB
SFO1       500.2235015 MHz

F2 - Processing parameters
SI          65536
SF          500.2200411 MHz
WDW         EM
SSB         0
LB          0.30 Hz
GB          0
PC          1.00

1D NMR plot parameters
CY          22.80 cm
CY          15.00 cm
F1P         9.000 ppm
F1          4501.98 Hz
F2P        -0.500 ppm
F2         -250.11 Hz
PPMCM       0.41667 ppm/cm
HZCM        208.42502 Hz/cm
    
```

# Z-restored spin-echo 13C spectrum with 1H decoupling

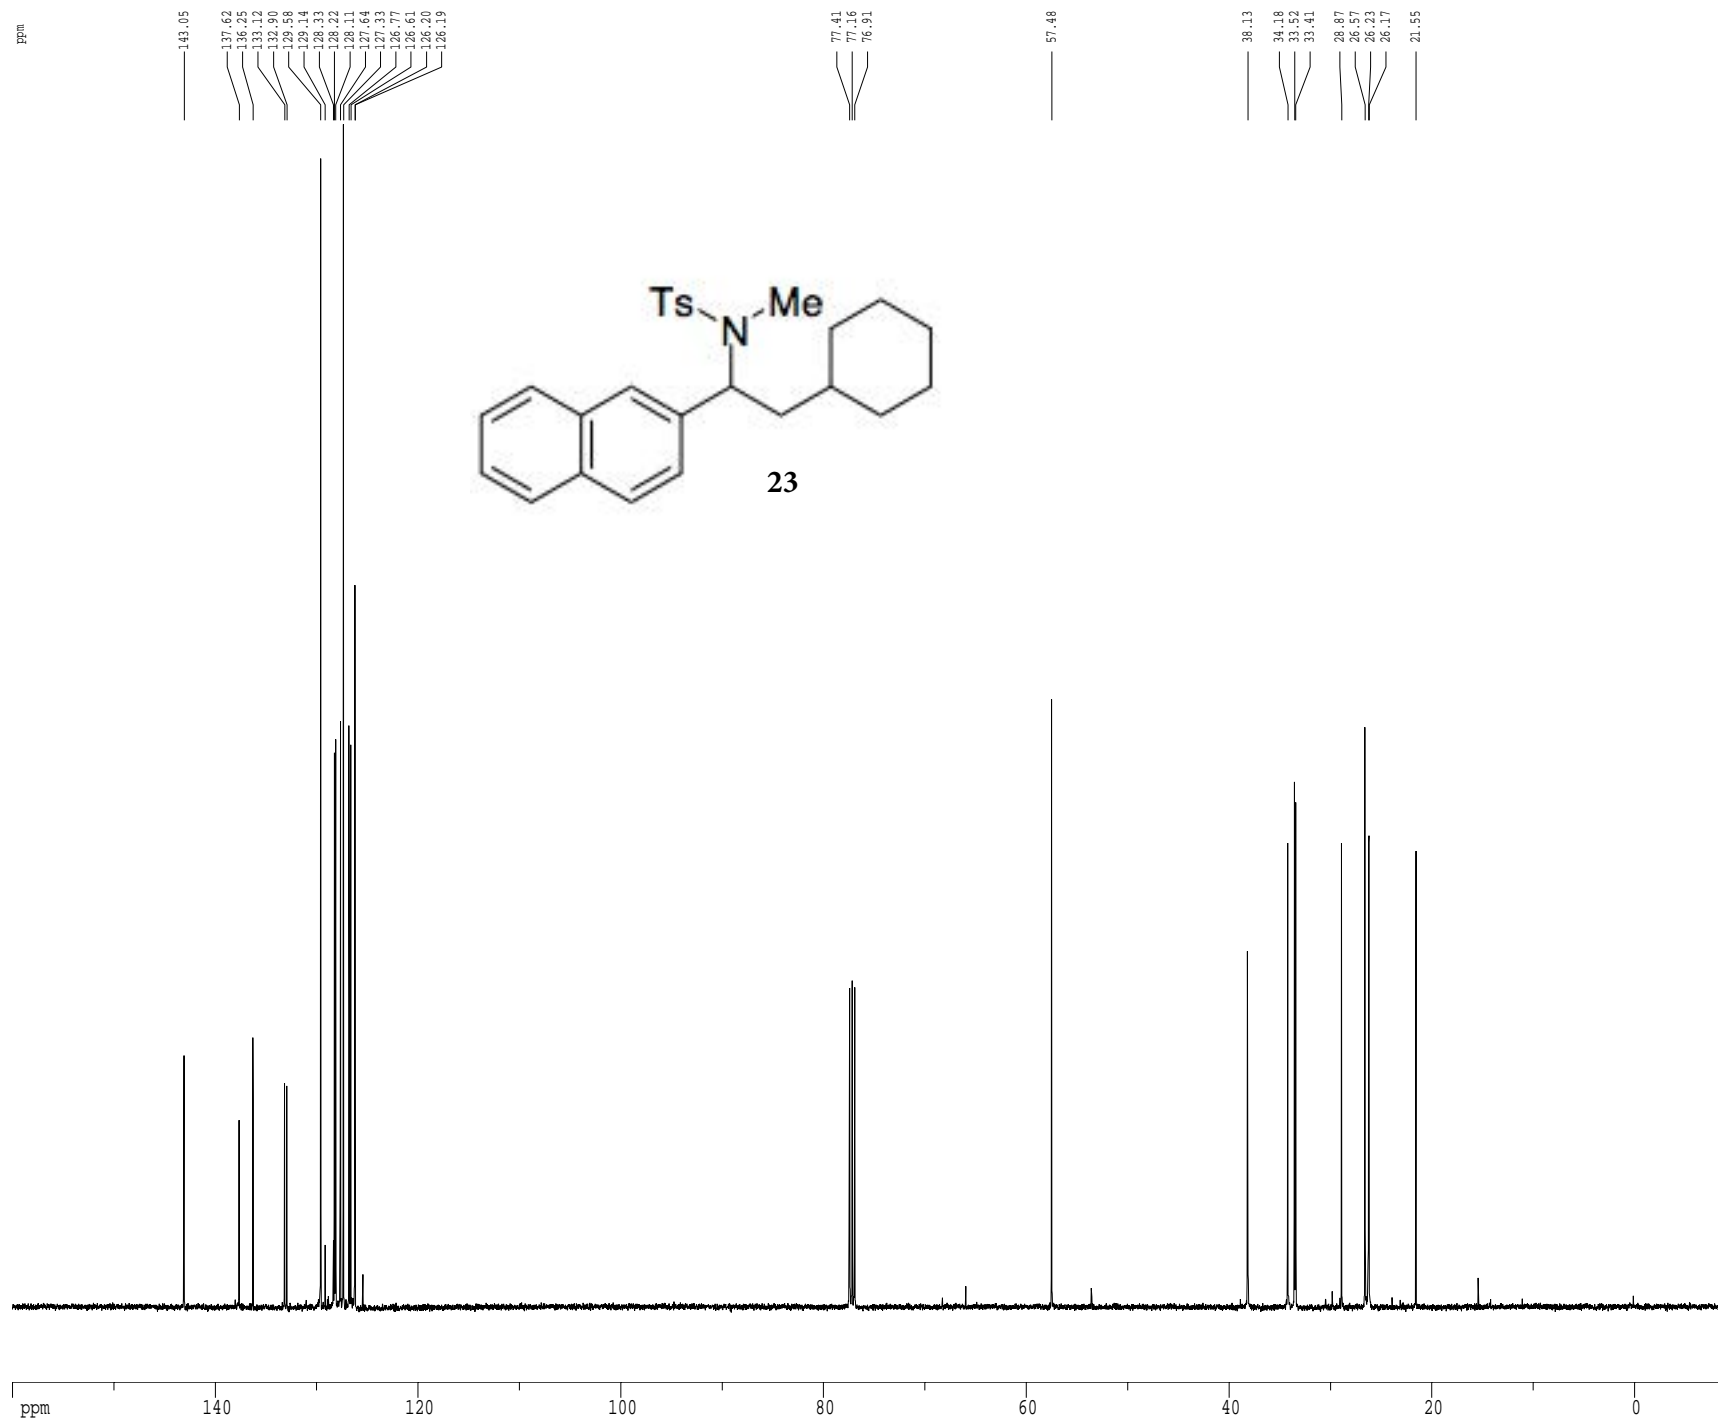

Current Data Parameters

|        |                 |
|--------|-----------------|
| USER   | khewitt1        |
| NAME   | ACM-I-120nap-CH |
| EXPNO  | 2               |
| PROCNO | 1               |

F2 - Acquisition Parameters

|         |                   |
|---------|-------------------|
| Date_   | 20191112          |
| Time    | 9.37              |
| INSTRUM | cryo500           |
| PROBHD  | 5 mm CPTCI 1H-    |
| PULPROG | SpinEcho30gp2.prd |
| TD      | 65536             |
| SOLVENT | CDCl3             |
| NS      | 504               |
| DS      | 16                |
| SWH     | 30303.031 Hz      |
| FIDRES  | 0.462388 Hz       |
| AQ      | 1.0813940 sec     |
| RG      | 3251              |
| DW      | 16.500 usec       |
| DE      | 6.00 usec         |
| TE      | 298.2 K           |
| D1      | 0.25000000 sec    |
| d11     | 0.03000000 sec    |
| d16     | 0.00020000 sec    |
| d17     | 0.00019600 sec    |
| MWREST  | 0.00000000 sec    |
| MWREX   | 0.01500000 sec    |
| P2      | 33.10 usec        |

===== CHANNEL f1 =====

|        |                 |
|--------|-----------------|
| NUC1   | 13C             |
| P1     | 16.55 usec      |
| P12    | 2000.00 usec    |
| P20    | 500.00 usec     |
| PL0    | 120.00 dB       |
| PL1    | -1.00 dB        |
| SFO1   | 125.7942548 MHz |
| SP2    | 2.70 dB         |
| SP4    | 2.70 dB         |
| SPNAM2 | Crp60comp.4     |
| SPNAM4 | Crp60,0.5,20.1  |
| SPOFF2 | 0.00 Hz         |
| SPOFF4 | 0.00 Hz         |

===== CHANNEL f2 =====

|         |                 |
|---------|-----------------|
| CPDPRG2 | waltz16         |
| NUC2    | 1H              |
| PCPD2   | 100.00 usec     |
| PL2     | 1.60 dB         |
| PL12    | 23.54 dB        |
| SFO2    | 500.2225011 MHz |

===== GRADIENT CHANNEL =====

|       |              |
|-------|--------------|
| GP1X1 | 0.00 %       |
| GP1X2 | 0.00 %       |
| GP1Y1 | 0.00 %       |
| GP1Y2 | 0.00 %       |
| GP21  | 30.00 %      |
| GP22  | 50.00 %      |
| p15   | 500.00 usec  |
| p16   | 1000.00 usec |

F2 - Processing parameters

|     |                 |
|-----|-----------------|
| SI  | 65536           |
| SP  | 125.7804136 MHz |
| WDW | EM              |
| SSB | 0               |
| LB  | 1.00 Hz         |
| GB  | 0               |
| PC  | 2.00            |

1D NMR plot parameters

|       |                 |
|-------|-----------------|
| CX    | 22.80 cm        |
| CY    | 15.65 cm        |
| F1P   | 160.000 ppm     |
| F1    | 20124.87 Hz     |
| F2P   | -10.000 ppm     |
| F2    | -1257.80 Hz     |
| PPMCM | 7.45614 ppm/cm  |
| HZCM  | 937.83643 Hz/cm |

<sup>1</sup>H spectrum

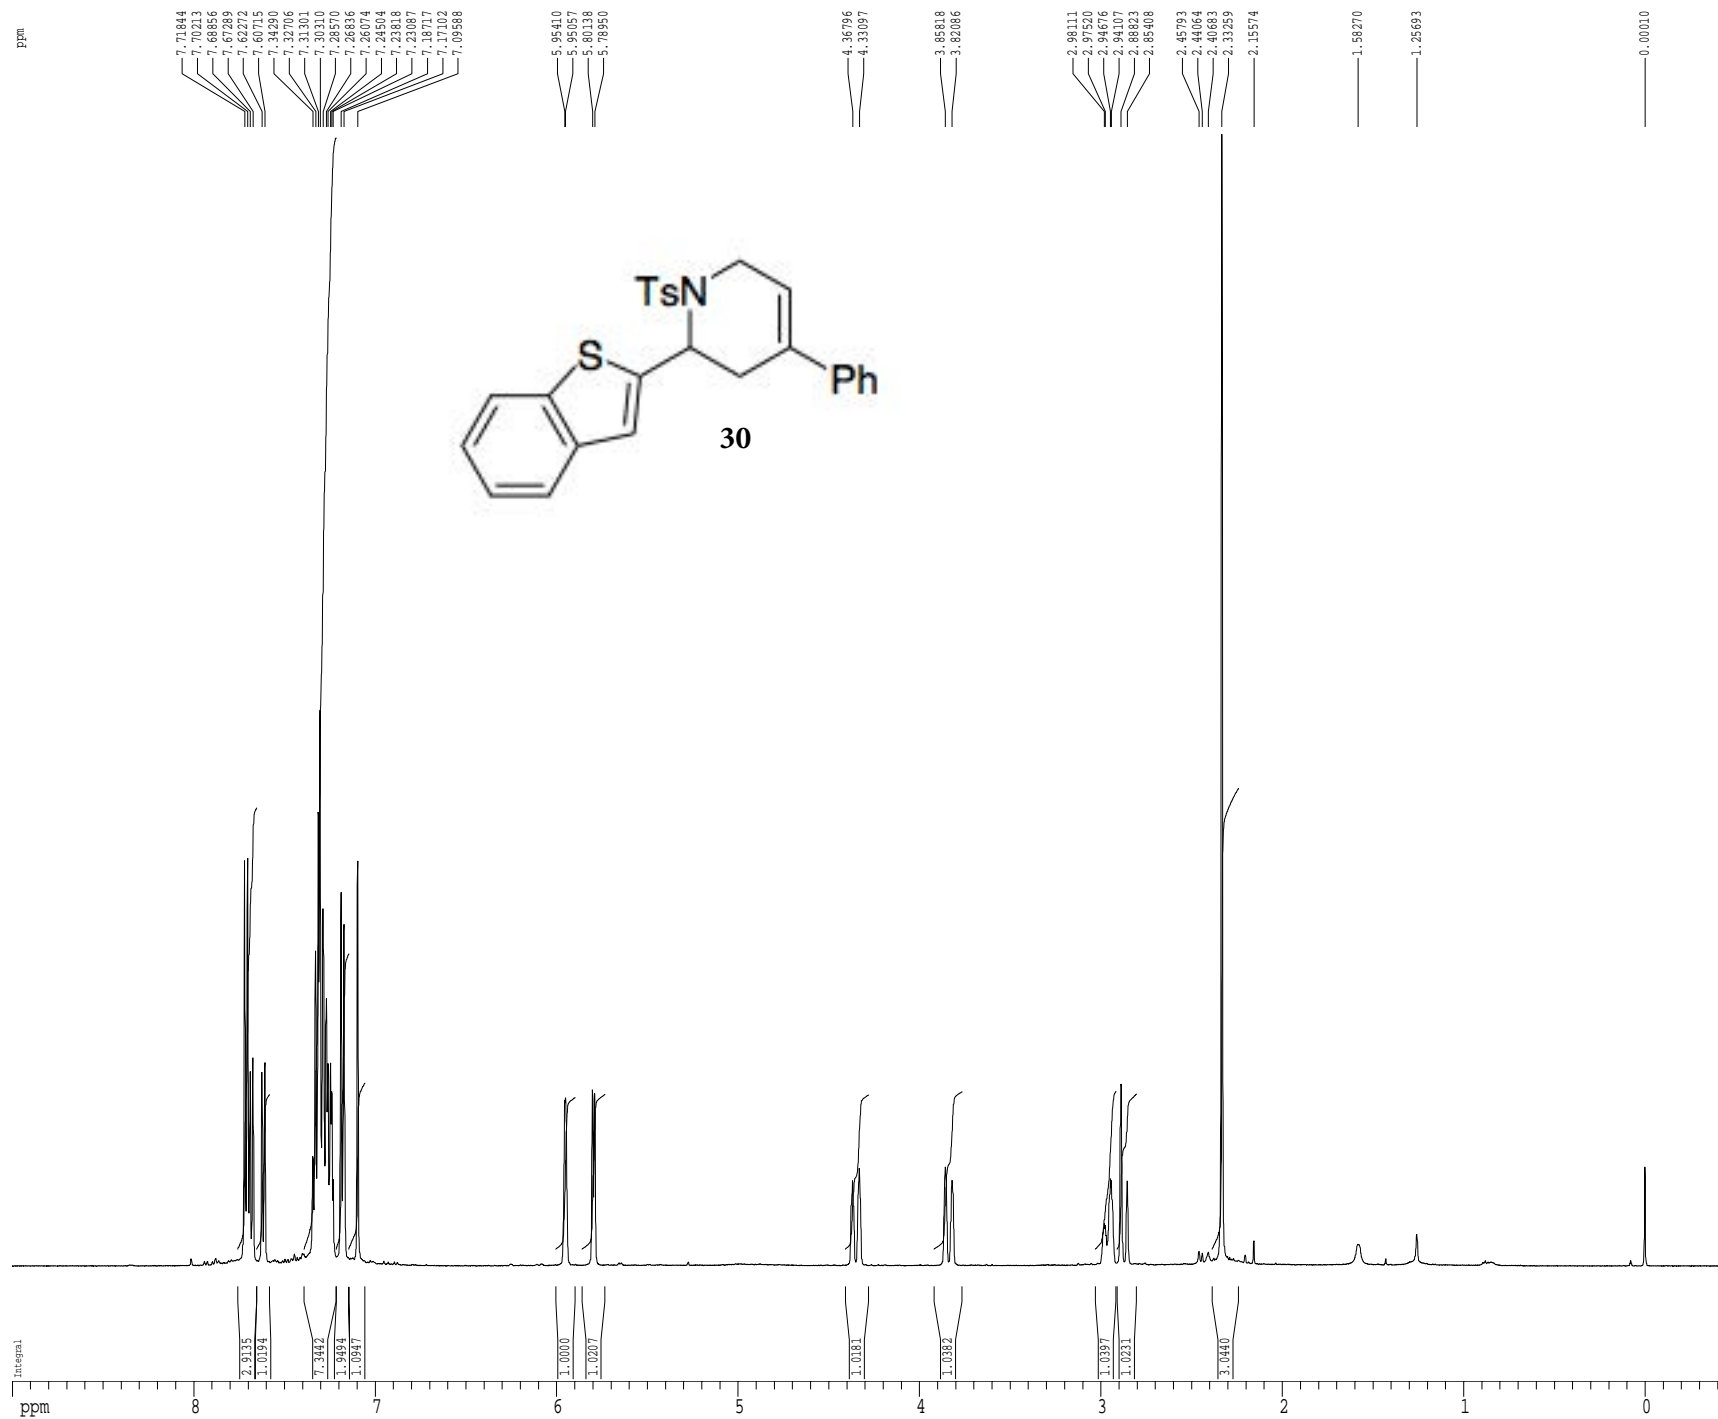

Current Data Parameters  
 USER khewitt1  
 NAME KAH-I-291-Z  
 EXPNO 3  
 PROCNO 1

F2 - Acquisition Parameters  
 Date\_ 20190302  
 Time 14.24  
 INSTRUM cryo500  
 PROBHD 5 mm CPTCI 1H-  
 PULPROG zg30  
 TD 48074  
 SOLVENT CDC13T  
 NS 8  
 DS 2  
 SWH 8012.820 Hz  
 FIDRES 0.166677 Hz  
 AQ 2.9998677 sec  
 RG 6.3  
 DW 62.400 usec  
 DE 6.00 usec  
 TE 298.0 K  
 D1 0.10000000 sec  
 MCREST 0.00000000 sec  
 MCWREK 0.01500000 sec

===== CHANNEL f1 =====  
 NUC1 1H  
 P1 7.50 usec  
 PL1 1.60 dB  
 SFO1 500.2235015 MHz

F2 - Processing parameters  
 SI 65536  
 SF 500.2200426 MHz  
 WDW no  
 SSB 0  
 LB 0.00 Hz  
 GB 0  
 PC 1.00

1D NMR plot parameters  
 CY 22.80 cm  
 CY 15.00 cm  
 F1P 9.000 ppm  
 F1 4501.98 Hz  
 F2P -0.500 ppm  
 F2 -250.11 Hz  
 PPMCM 0.41667 ppm/cm  
 HZCM 208.42502 Hz/cm



# Z-restored spin-echo 13C spectrum with 1H decoupling

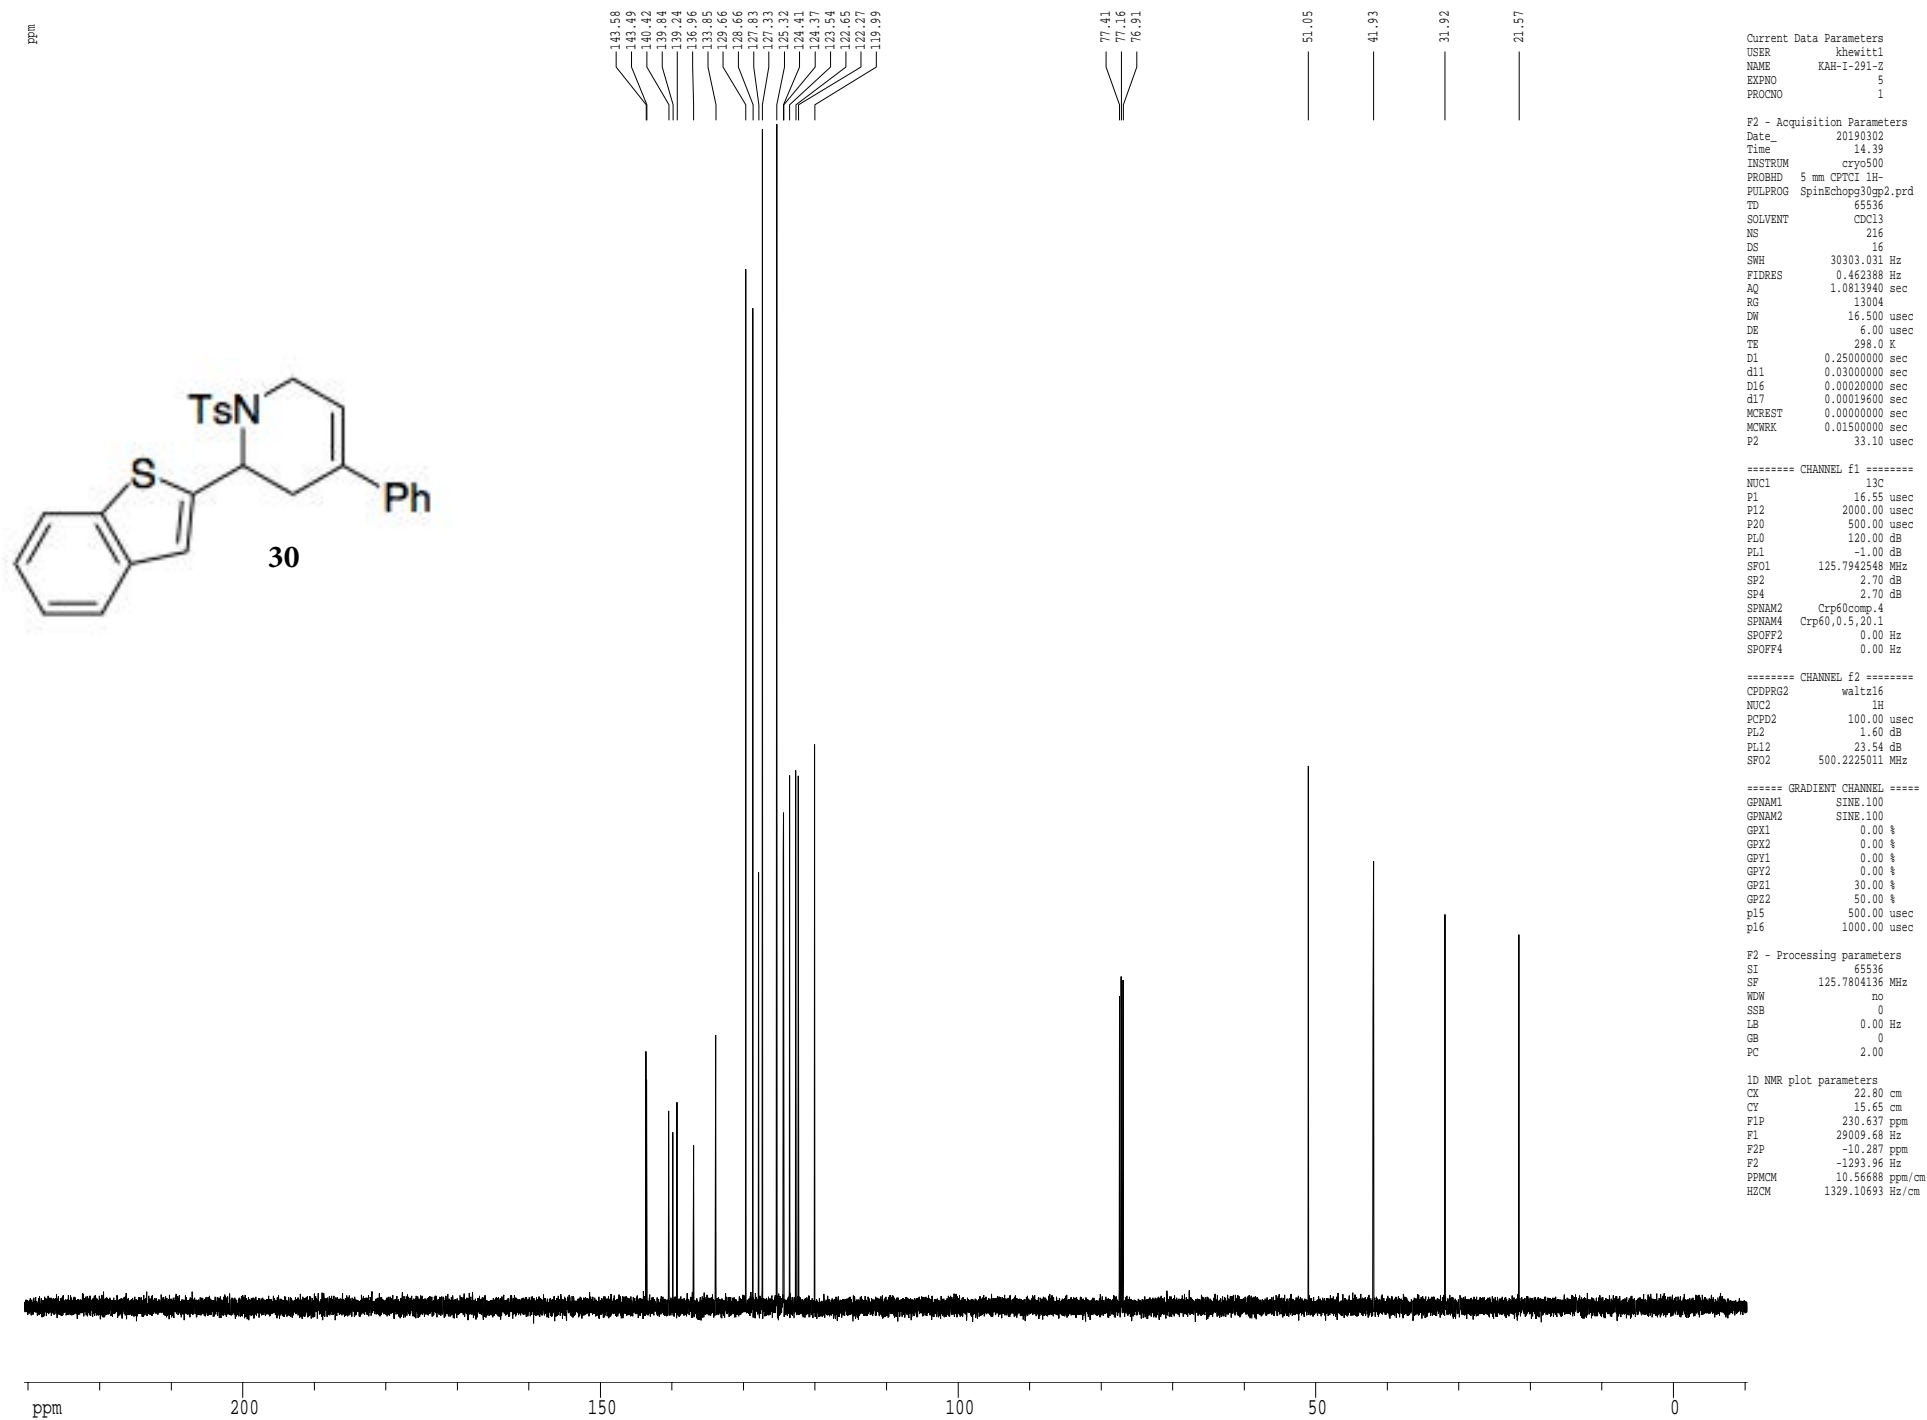

gcosy60

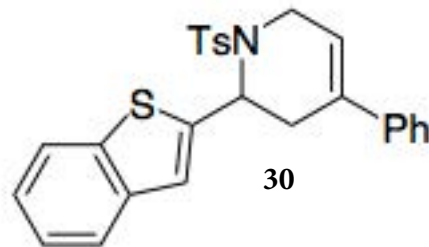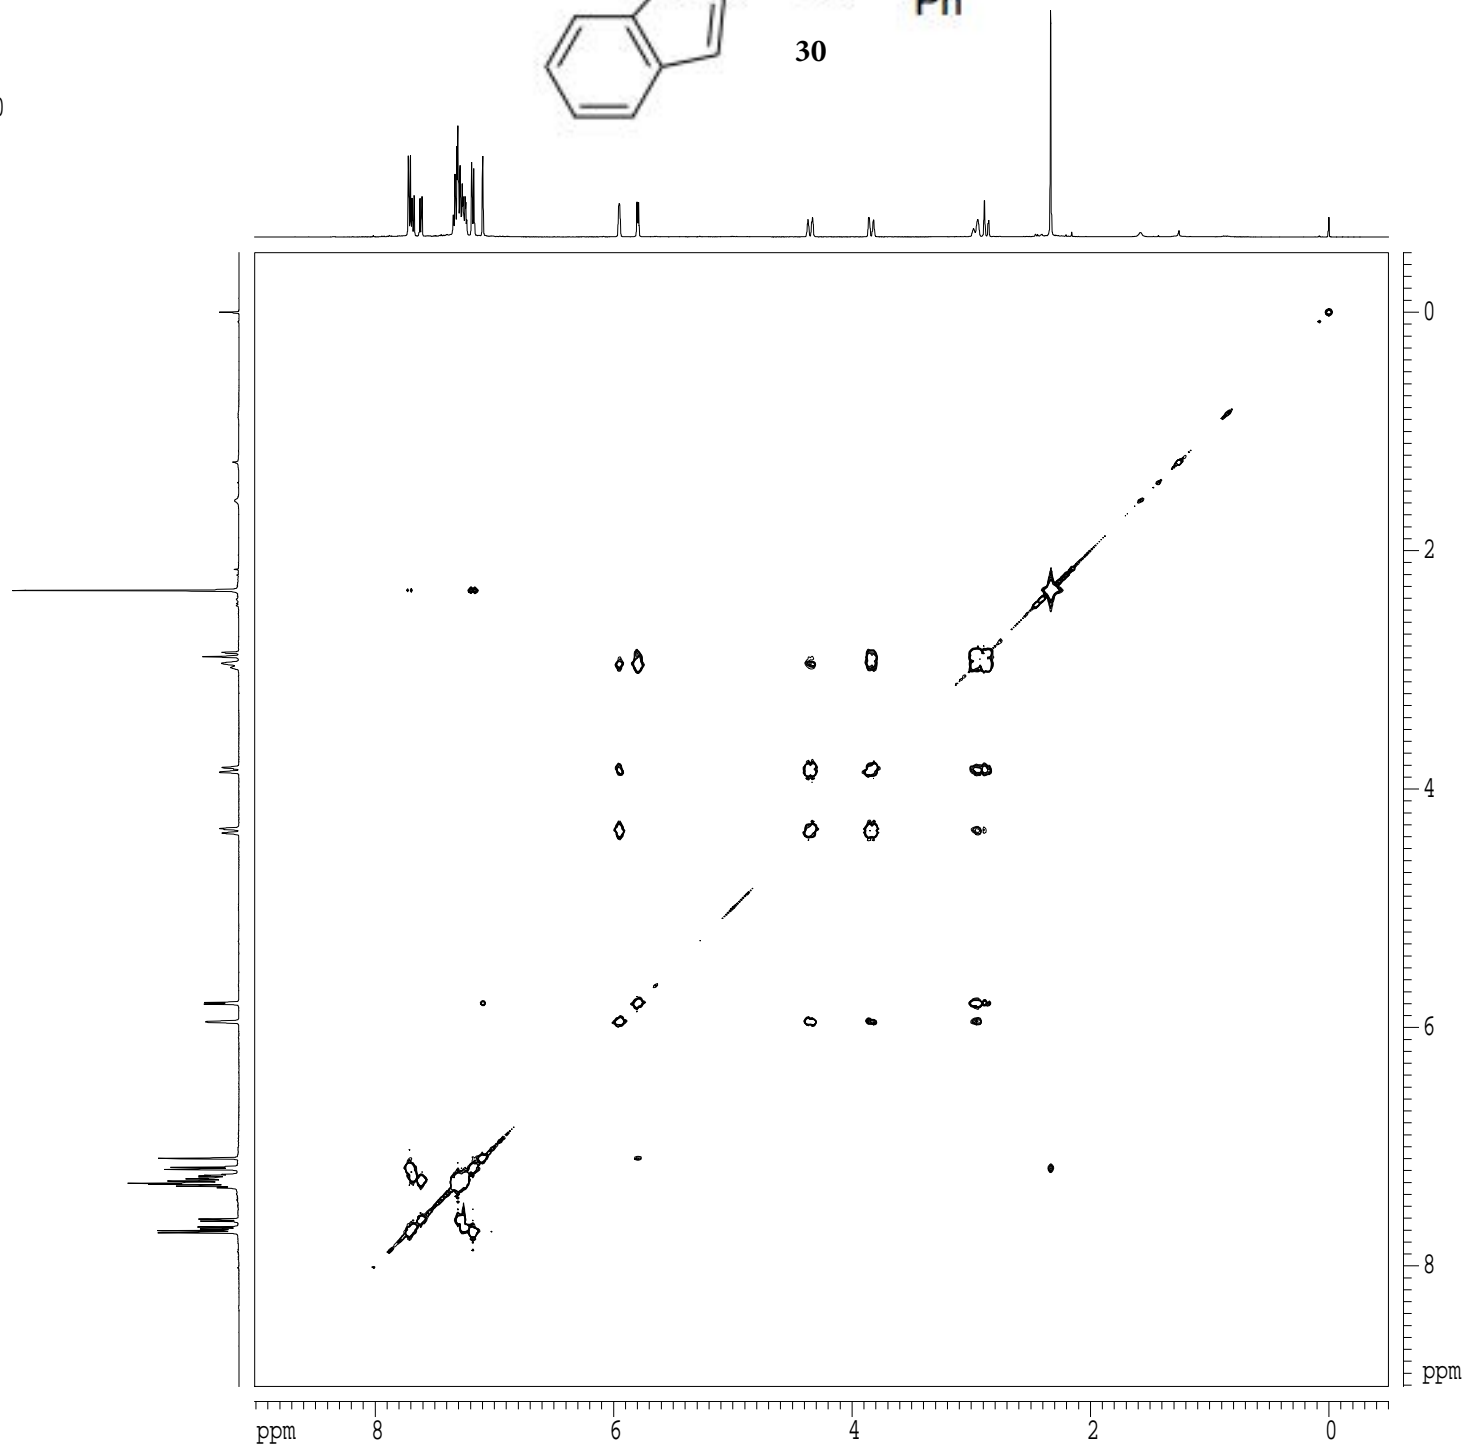

Current Data Parameters  
 USER khewitt1  
 NAME KAH-I-291-Z  
 EXPNO 4  
 PROCNO 1

F2 - Acquisition Parameters  
 Date\_ 20190302  
 Time 14.26  
 INSTRUM cryo500  
 PROBHD 5 mm CPTCI 1H-  
 PULPROG cosygp60.prd  
 TD 2048  
 SOLVENT CDCl3  
 NS 1  
 DS 16  
 SWH 8012.820 Hz  
 FIDRES 3.912510 Hz  
 AQ 0.1278452 sec  
 RG 114  
 DW 62.400 usec  
 DE 6.00 usec  
 TE 298.0 K  
 d0 0.00000300 sec  
 D1 1.00000000 sec  
 d13 0.00000300 sec  
 D16 0.00020000 sec  
 IN0 0.00012480 sec

===== CHANNEL f1 =====  
 NUC1 1H  
 P1 7.50 usec  
 PL1 1.60 dB  
 SF01 500.2235015 MHz

===== GRADIENT CHANNEL =====  
 GPNAM1 sine.100  
 GPNAM2 sine.100  
 GPX1 0.00 %  
 GPX2 0.00 %  
 GPY1 0.00 %  
 GPY2 0.00 %  
 GPZ1 17.00 %  
 GPZ2 17.00 %  
 P16 1000.00 usec

F1 - Acquisition parameters  
 ND0 1  
 TD 512  
 SF01 500.2235 MHz  
 FIDRES 15.650040 Hz  
 SW 16.018 ppm  
 FhMODE QF

F2 - Processing parameters  
 SI 1024  
 SF 500.2200426 MHz  
 WDW SINE  
 SSB 0  
 LB 0.00 Hz  
 GB 0  
 PC 1.00

F1 - Processing parameters  
 SI 1024  
 MC2 QF  
 SF 500.2200426 MHz  
 WDW SINE  
 SSB 0  
 LB 0.00 Hz  
 GB 0

2D NMR plot parameters  
 CX2 15.00 cm  
 CX1 15.00 cm  
 F2PLO 9.011 ppm  
 F2LO 4507.45 Hz  
 F2PHI -0.500 ppm  
 F2HI -250.16 Hz  
 F1PLO 9.011 ppm  
 F1LO 4507.45 Hz  
 F1PHI -0.500 ppm  
 F1HI -250.16 Hz  
 F2PPMCM 0.63407 ppm/cm  
 F2HZCM 317.17413 Hz/cm  
 F1PPMCM 0.63407 ppm/cm  
 F1HZCM 317.17413 Hz/cm

<sup>1</sup>H spectrum

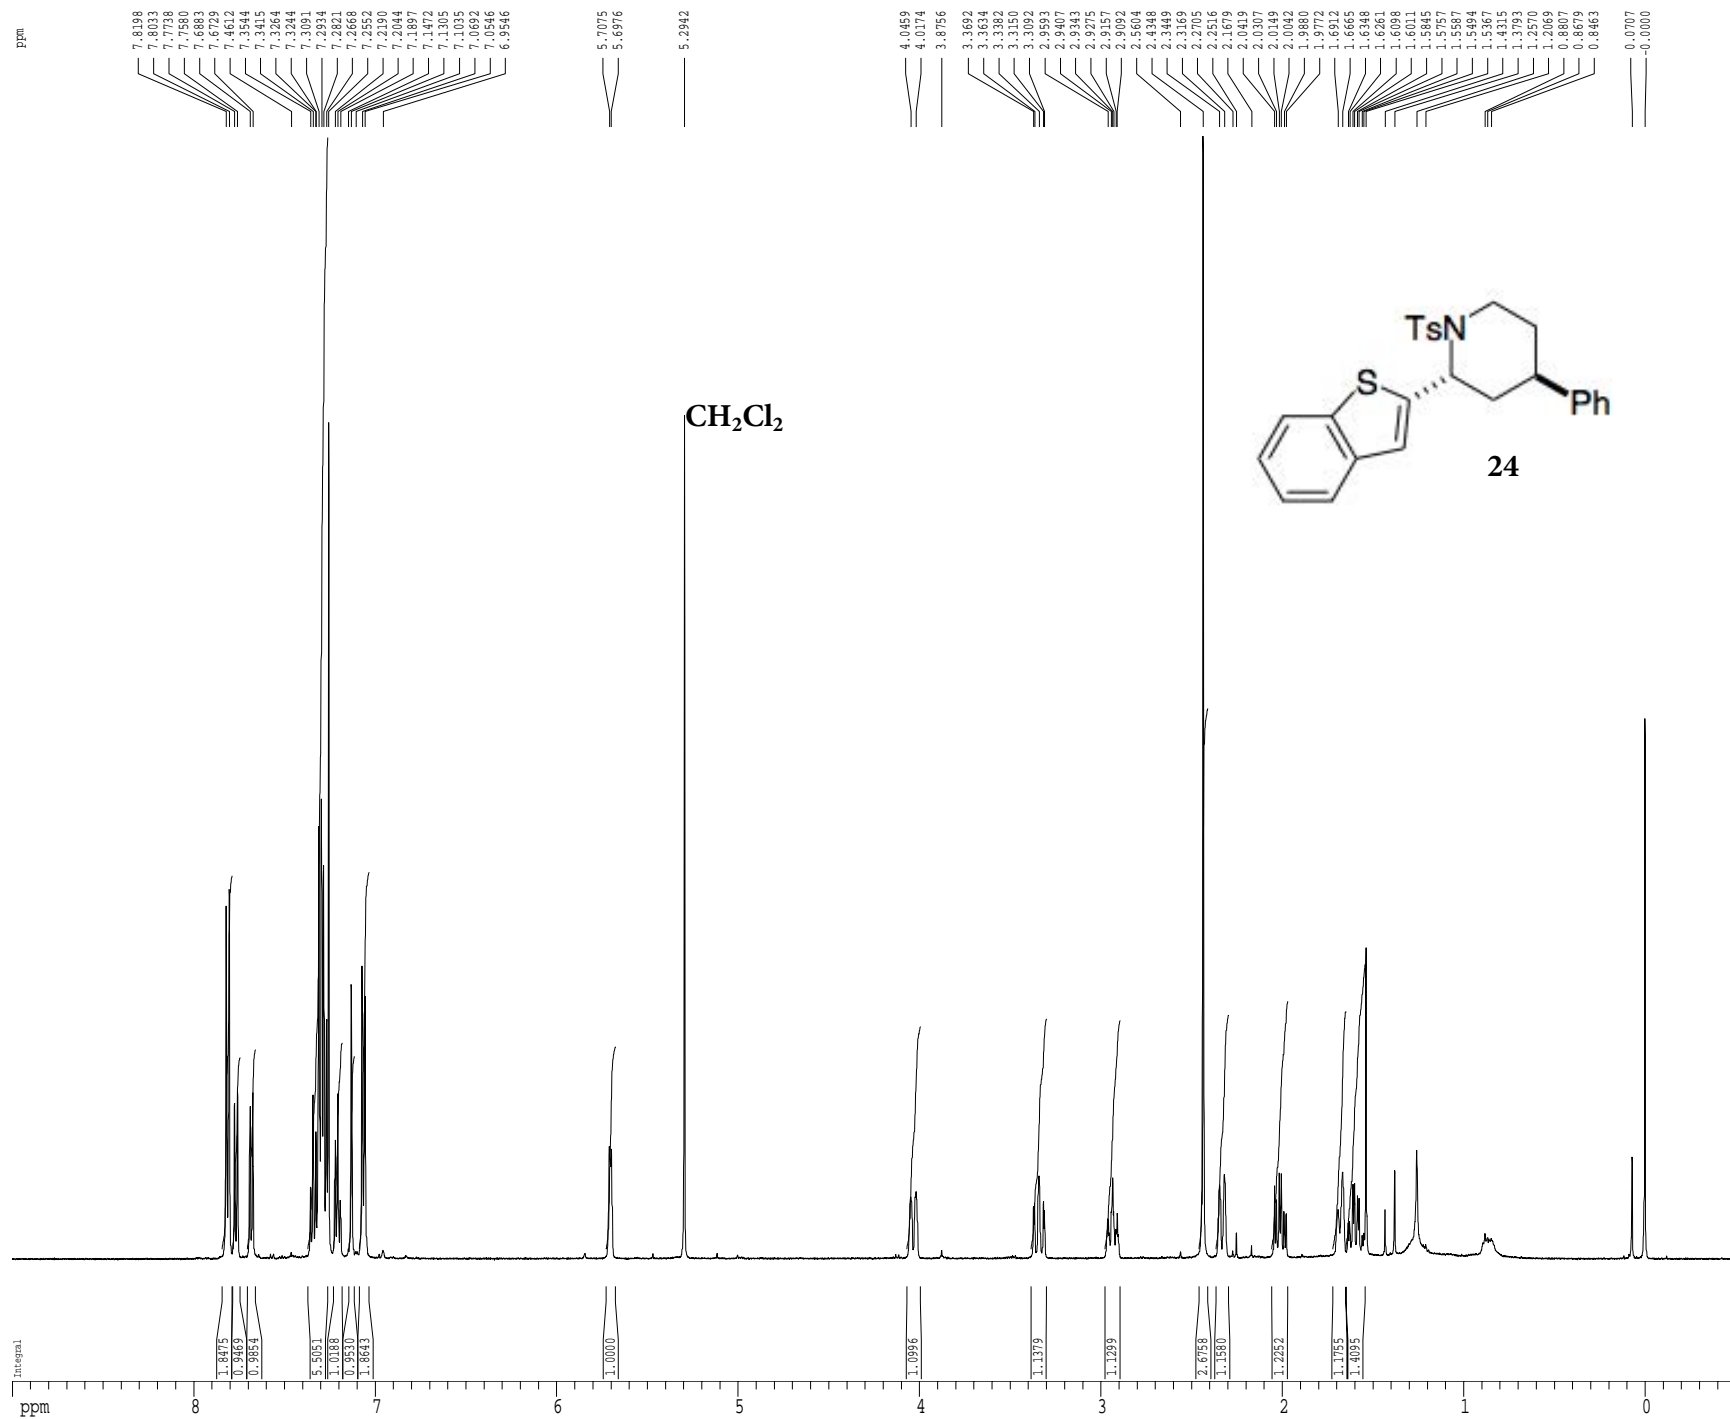

Current Data Parameters  
 USER khewitt1  
 NAME KAH-I-214-Z  
 EXPNO 1  
 PROCNO 1

F2 - Acquisition Parameters  
 Date\_ 20181204  
 Time 11.04  
 INSTRUM cryo500  
 PROBHD 5 mm CPTCI 1H-  
 PULPROG zg30  
 TD 48074  
 SOLVENT CDCl3T  
 NS 8  
 DS 2  
 SWH 8012.820 Hz  
 FIDRES 0.166677 Hz  
 AQ 2.9998677 sec  
 RG 7.1  
 DW 62.400 usec  
 DE 6.00 usec  
 TE 298.0 K  
 D1 0.10000000 sec  
 MCREST 0.00000000 sec  
 MCWRE 0.01500000 sec

===== CHANNEL f1 =====  
 NUC1 1H  
 P1 7.50 usec  
 PL1 1.60 dB  
 SF01 500.2235015 MHz

F2 - Processing parameters  
 SI 65536  
 SF 500.2200349 MHz  
 WDW no  
 SSB 0  
 LB 0.00 Hz  
 GB 0  
 PC 1.00

1D NMR plot parameters  
 CY 22.80 cm  
 CY 15.00 cm  
 F1P 9.000 ppm  
 F1 4501.98 Hz  
 F2P -0.500 ppm  
 F2 -250.11 Hz  
 PPMCM 0.41667 ppm/cm  
 HZCM 208.42502 Hz/cm

c13.c

ppm

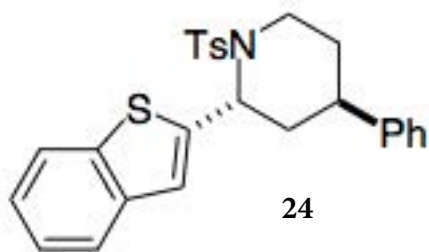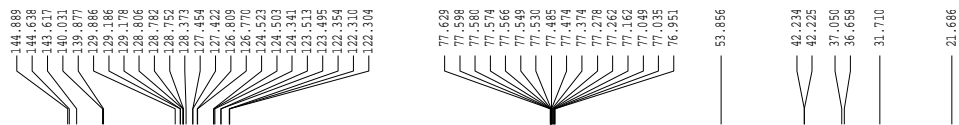

Current Data Parameters  
 USER khewitt1  
 NAME KAH-I-214-Z-C  
 EXPNO 2  
 PROCNO 1

F2 - Acquisition Parameters  
 Date\_ 20210714  
 Time 11.13  
 INSTRUM av600  
 PROBHD 5 mm CPBBO BB-  
 PULPROG zgpg30  
 TD 65536  
 SOLVENT CDCl3T  
 NS 1024  
 DS 4  
 SWH 36231.883 Hz  
 FIDRES 0.552855 Hz  
 AQ 0.9044468 sec  
 RG 2050  
 DW 13.800 usec  
 DE 19.63 usec  
 TE 298.0 K  
 D1 0.40000001 sec  
 D11 0.03000000 sec  
 TD0 1

===== CHANNEL f1 =====  
 SF01 150.9194080 MHz  
 NUC1 13C  
 P1 10.10 usec

F2 - Processing parameters  
 SI 65536  
 SF 150.9027936 MHz  
 WDW no  
 SSB 0  
 LB 0.00 Hz  
 GB 0  
 PC 0.10

1D NMR plot parameters  
 CX 22.80 cm  
 CY 15.00 cm  
 FLIP 230.150 ppm  
 F1 34730.32 Hz  
 F2P -9.951 ppm  
 F2 -1501.56 Hz  
 PPMCM 10.53074 ppm/cm  
 HZCM 1589.11768 Hz/cm

ppm

200

150

100

50

0

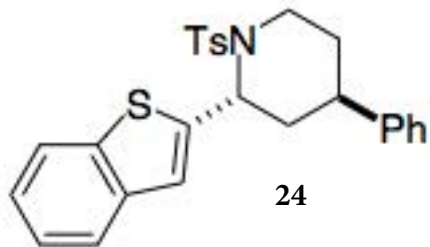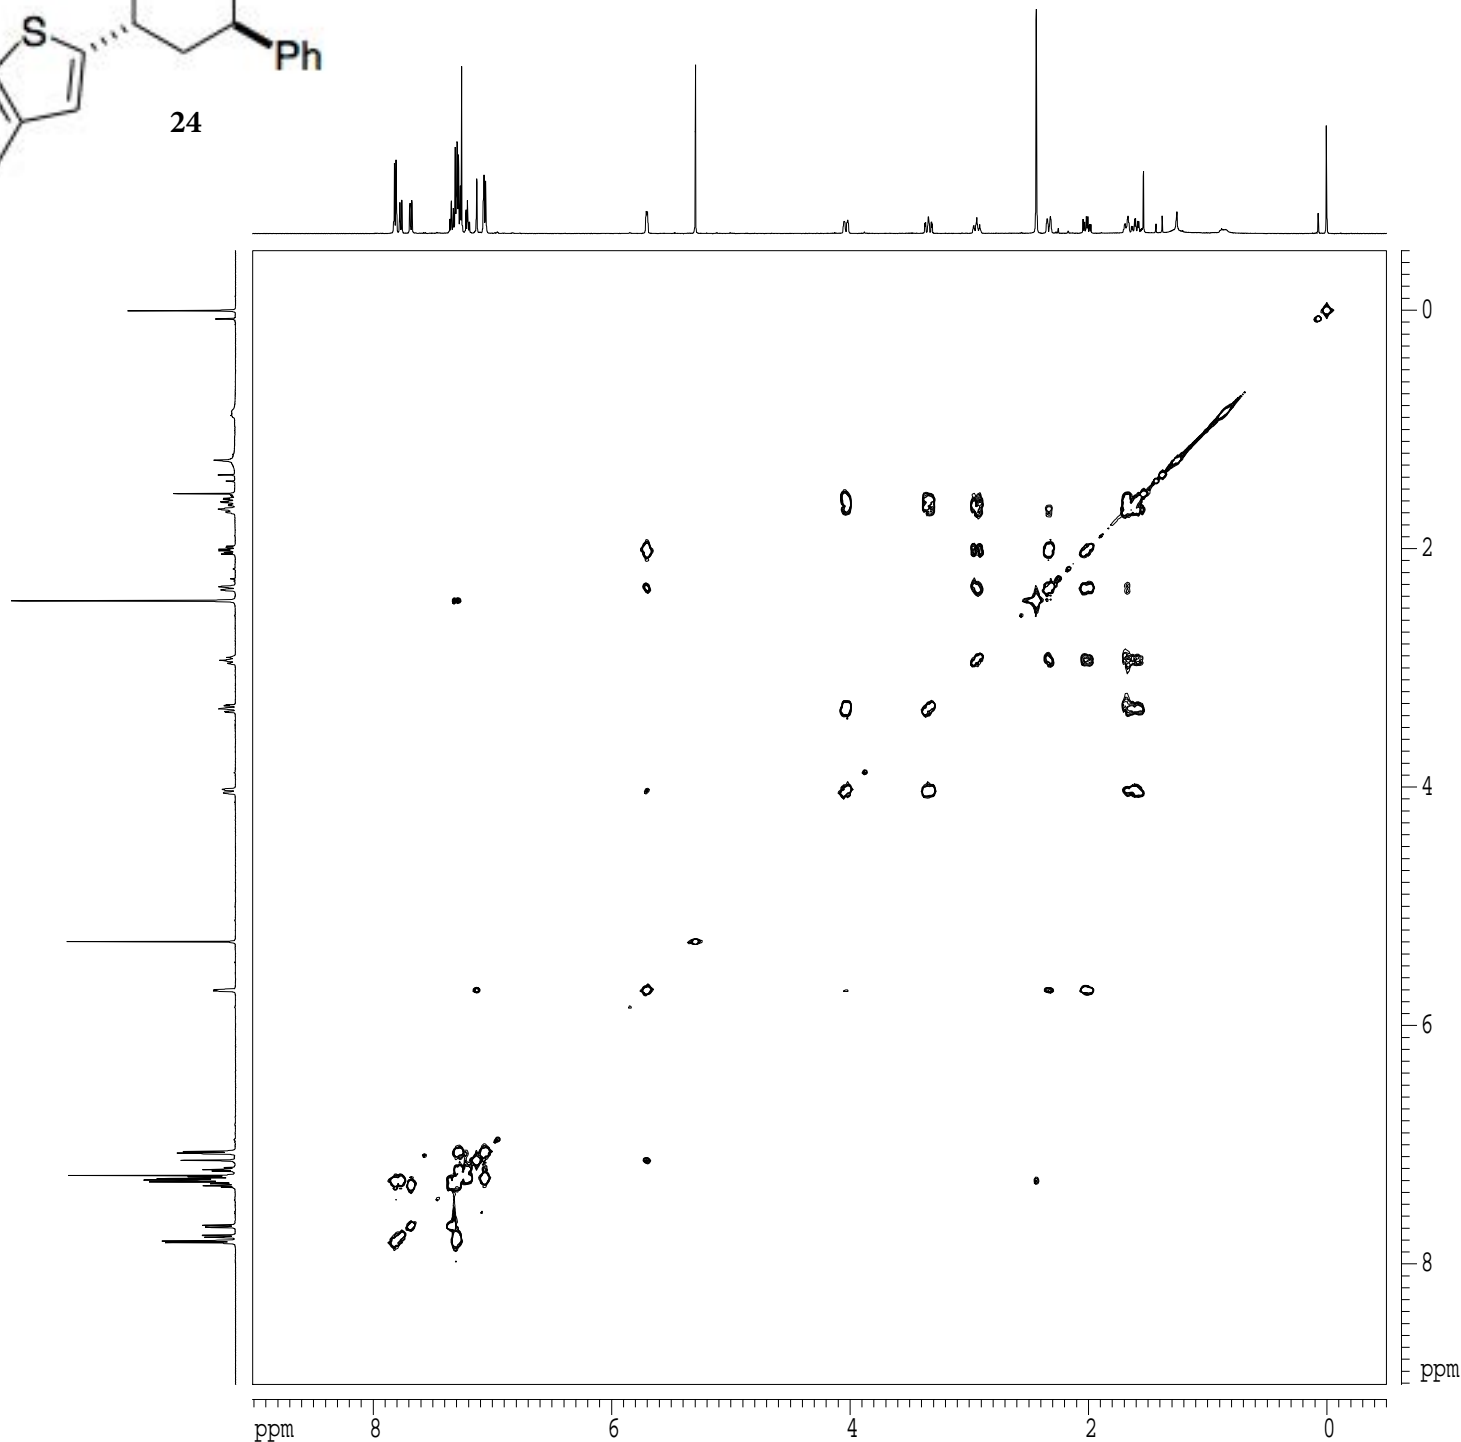

Current Data Parameters  
USER khewitt1  
NAME KAH-I-214-Z  
EXPNO 2  
PROCNO 1

F2 - Acquisition Parameters  
Date\_ 20181204  
Time 11.06  
INSTRUM cryo500  
PROBHD 5 mm CPTCI 1H-  
PULPROG cosygp60.prd  
TD 2048  
SOLVENT CDCl3  
NS 1  
DS 16  
SWH 8012.820 Hz  
FIDRES 3.912510 Hz  
AQ 0.1278452 sec  
RG 362  
DW 62.400 usec  
DE 6.00 usec  
TE 298.0 K  
d0 0.00000300 sec  
D1 1.00000000 sec  
d13 0.00000300 sec  
D16 0.00020000 sec  
IN0 0.00012480 sec

===== CHANNEL f1 =====  
NUC1 1H  
P1 7.50 usec  
PL1 1.60 dB  
SFO1 500.2235015 MHz

===== GRADIENT CHANNEL =====  
GPNAM1 sine.100  
GPNAM2 sine.100  
GPX1 0.00 %  
GPX2 0.00 %  
GPY1 0.00 %  
GPY2 0.00 %  
GPZ1 17.00 %  
GPZ2 17.00 %  
P16 1000.00 usec

F1 - Acquisition parameters  
ND0 1  
TD 512  
SFO1 500.2235 MHz  
FIDRES 15.650040 Hz  
SW 16.018 ppm  
FnMODE QF

F2 - Processing parameters  
SI 1024  
SF 500.2200349 MHz  
WDW SINE  
SSB 0  
LB 0.00 Hz  
GB 0  
PC 1.00

F1 - Processing parameters  
SI 1024  
MC2 QF  
SF 500.2200349 MHz  
WDW SINE  
SSB 0  
LB 0.00 Hz  
GB 0

2D NMR plot parameters  
CX2 15.00 cm  
CX1 15.00 cm  
F2PLO 9.011 ppm  
F2LO 4507.33 Hz  
F2PHI -0.500 ppm  
F2HI -250.28 Hz  
F1PLO 9.011 ppm  
F1LO 4507.33 Hz  
F1PHI -0.500 ppm  
F1HI -250.28 Hz  
F2PPMCM 0.63407 ppm/cm  
F2HZCM 317.17413 Hz/cm  
F1PPMCM 0.63407 ppm/cm  
F1HZCM 317.17413 Hz/cm

gnoe

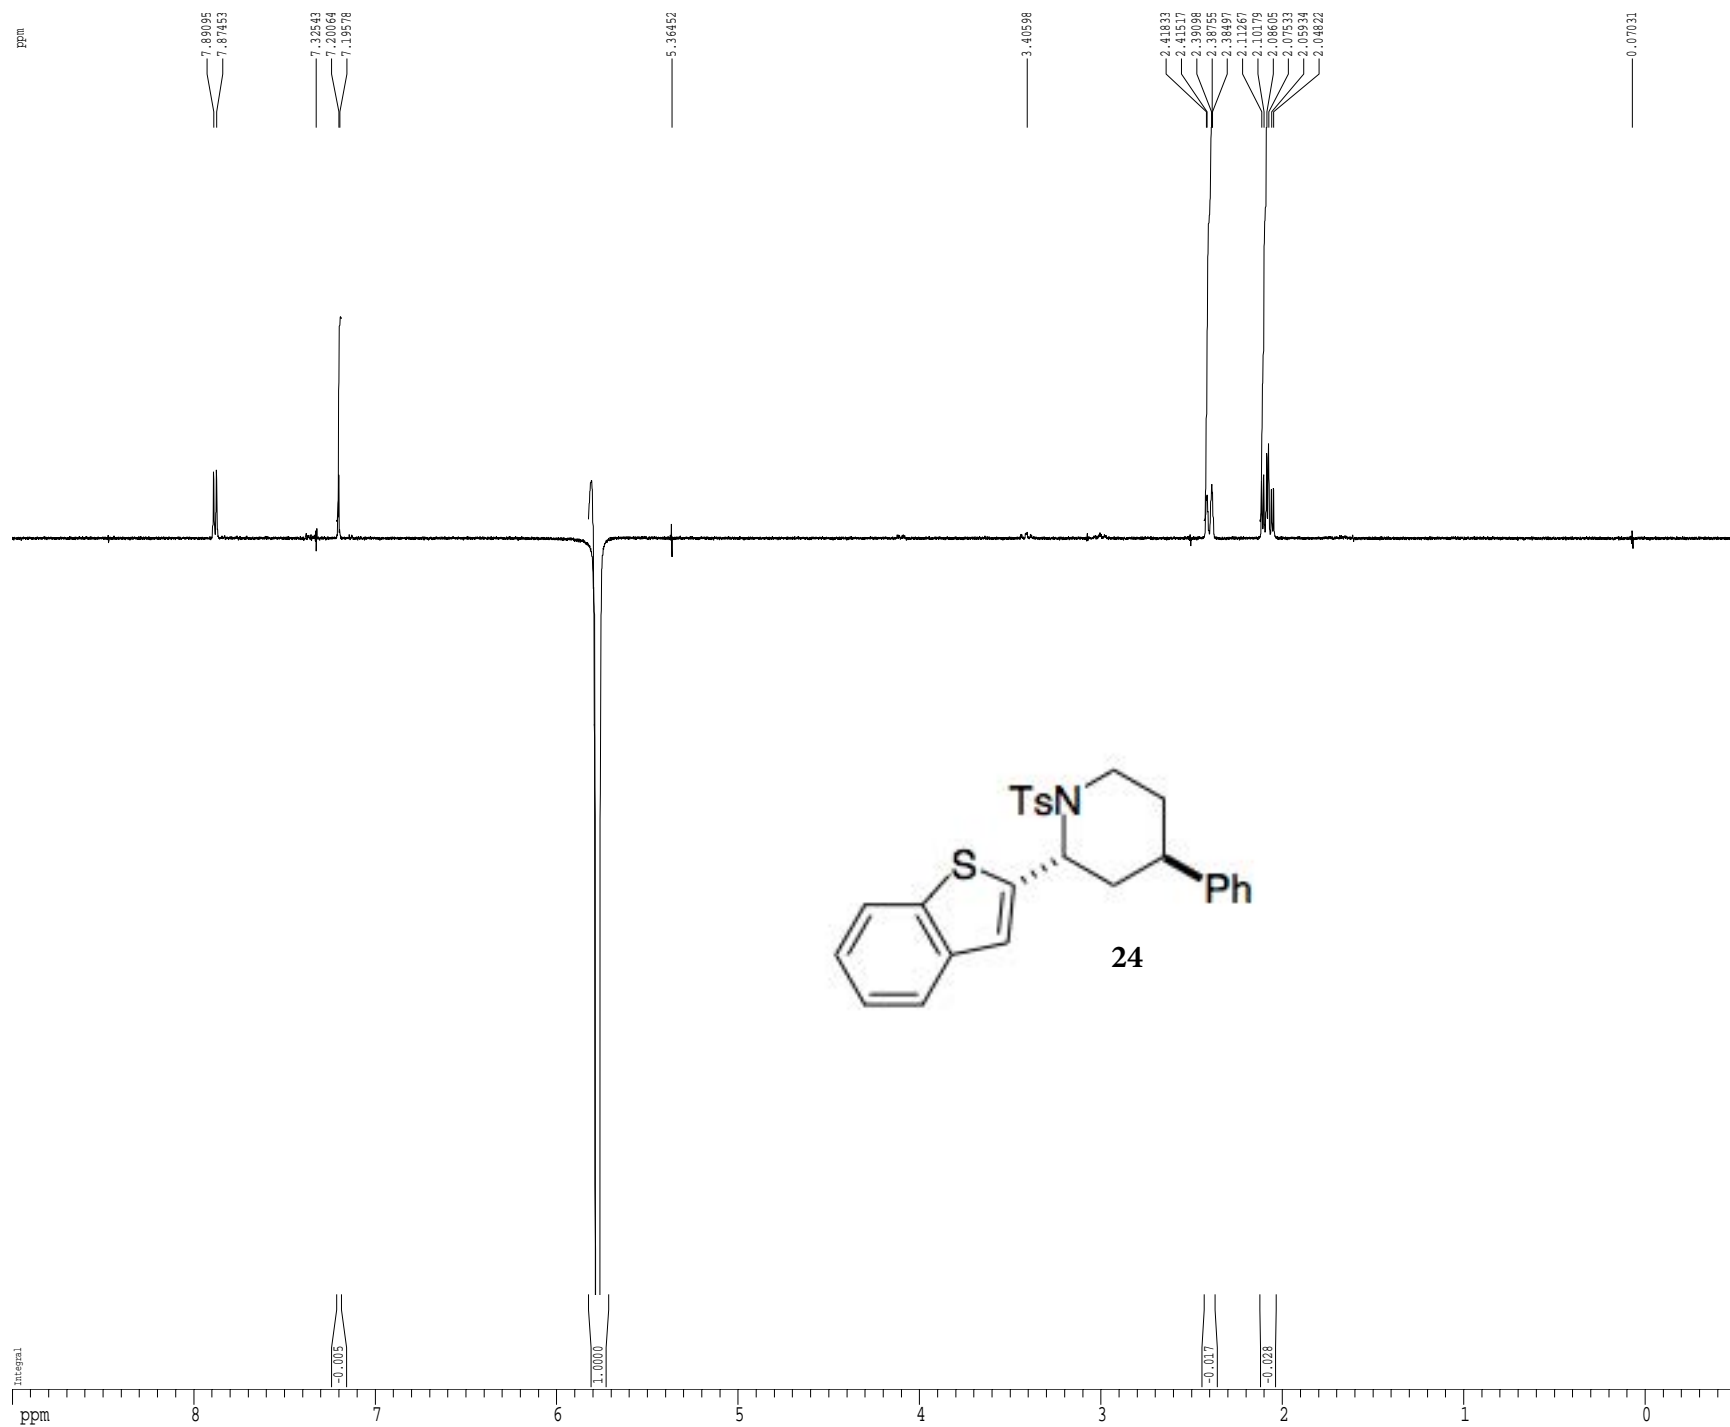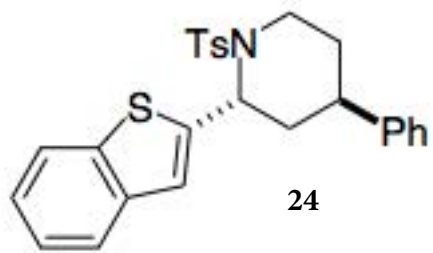

Current Data Parameters

|        |             |
|--------|-------------|
| USER   | khewitt1    |
| NAME   | KAH-I-214-Z |
| EXPNO  | 3           |
| PROCNO | 1           |

F2 - Acquisition Parameters

|         |                |
|---------|----------------|
| Date_   | 20181204       |
| Time    | 11.30          |
| INSTRUM | cryo500        |
| PROBHD  | 5 mm CPTCI 1H- |
| PULPROG | gnoe1cc22.prd  |
| TD      | 65536          |
| SOLVENT | CDCl3          |
| NS      | 128            |
| DS      | 8              |
| SNH     | 8012.820 Hz    |
| FIDRES  | 0.122266 Hz    |
| AQ      | 4.0894966 sec  |
| RG      | 114            |
| DW      | 62.400 usec    |
| DE      | 6.00 usec      |
| TE      | 298.0 K        |
| D1      | 1.00000000 sec |
| D8      | 0.50000000 sec |
| D16     | 0.00020000 sec |
| d21     | 0.33376500 sec |
| d22     | 0.16399699 sec |
| p2      | 15.00 usec     |

===== CHANNEL f1 =====

|        |                 |
|--------|-----------------|
| NUC1   | 1H              |
| P1     | 7.50 usec       |
| p3     | 22.50 usec      |
| p4     | 30.00 usec      |
| p5     | 20.00 usec      |
| P29    | 40000.00 usec   |
| PL1    | 1.60 dB         |
| SFO1   | 500.2228874 MHz |
| SP9    | 61.60 dB        |
| SPNAM9 | gauss1.512      |
| SPOFF9 | 0.00 Hz         |

===== GRADIENT CHANNEL =====

|        |              |
|--------|--------------|
| GPNAM1 | sine.100     |
| GPNAM2 | sine.100     |
| GPNAM3 | sine.100     |
| GPNAM4 | sine.100     |
| GPX1   | 0.00 %       |
| GPX2   | 0.00 %       |
| GPX3   | 0.00 %       |
| GPX4   | 0.00 %       |
| GPY1   | 0.00 %       |
| GPY2   | 0.00 %       |
| GPY3   | 0.00 %       |
| GPY4   | 0.00 %       |
| GPZ1   | 7.00 %       |
| GPZ2   | 3.00 %       |
| GPZ3   | 2.30 %       |
| GPZ4   | -2.30 %      |
| P16    | 1000.00 usec |

F2 - Processing parameters

|     |                 |
|-----|-----------------|
| SI  | 65536           |
| SF  | 500.2200000 MHz |
| WDW | no              |
| SSB | 0               |
| LB  | 0.00 Hz         |
| GB  | 0               |
| PC  | 1.00            |

1D NMR plot parameters

|       |                 |
|-------|-----------------|
| CX    | 22.80 cm        |
| CY    | 50.00 cm        |
| F1P   | 9.000 ppm       |
| F1    | 4501.98 Hz      |
| F2P   | -0.500 ppm      |
| F2    | -250.11 Hz      |
| PPMCM | 0.41667 ppm/cm  |
| HZCM  | 208.42500 Hz/cm |

# <sup>1</sup>H spectrum

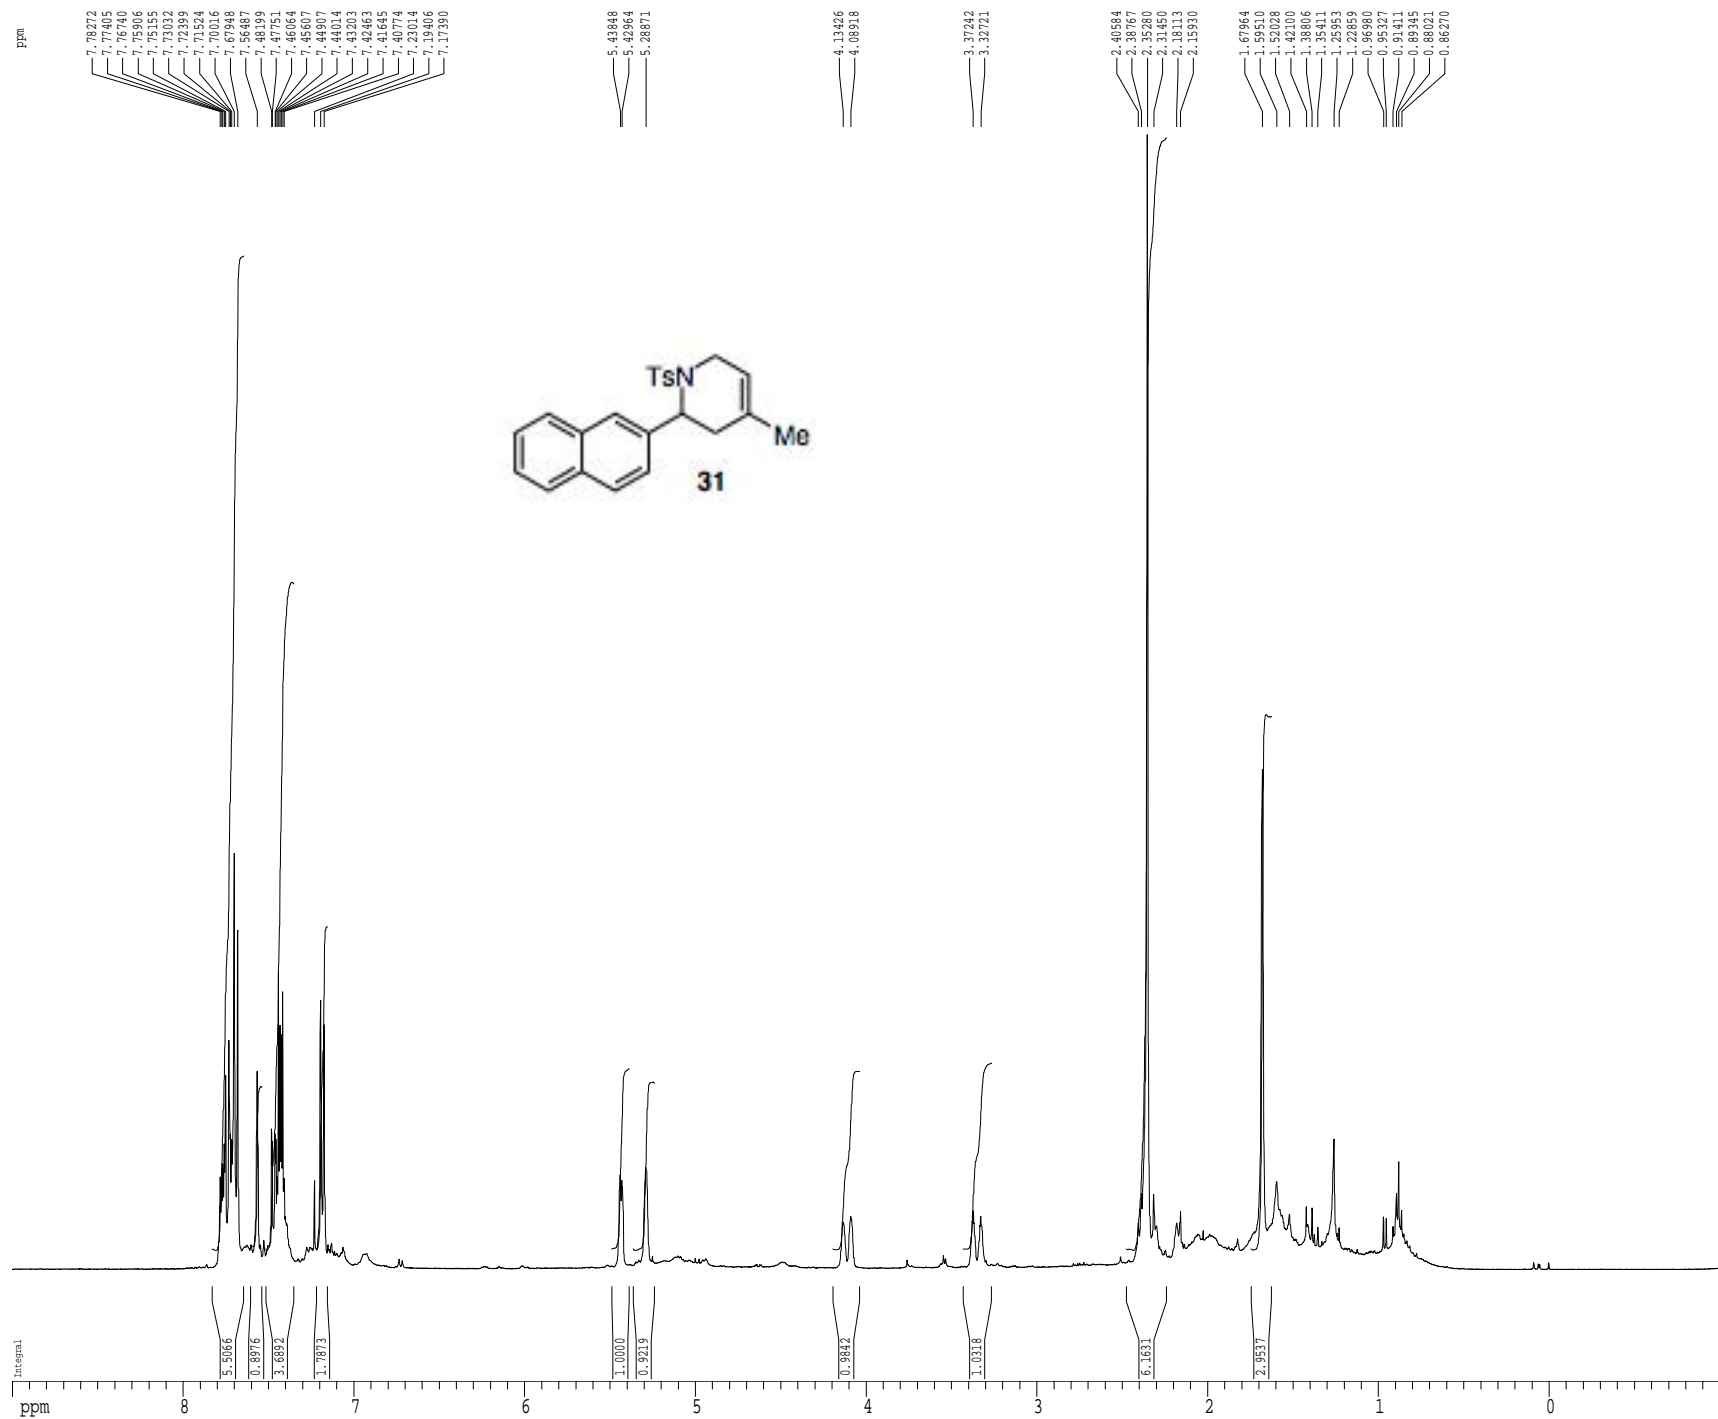

Current Data Parameters  
 USER caherber  
 NAME CAH-I-221  
 EXPNO 1  
 PROCNO 1

F2 - Acquisition Parameters  
 Date\_ 20210525  
 Time 11.17  
 INSTRUM drx400  
 PROBHD 5 mm QNP H/F/P  
 PULPROG zg30  
 TD 65536  
 SOLVENT CDCl3  
 NS 8  
 DS 2  
 SWH 6410.256 Hz  
 FIDRES 0.097813 Hz  
 AQ 5.1118579 sec  
 RG 50.8  
 DW 78.000 usec  
 DE 4.50 usec  
 TE 298.0 K  
 D1 0.10000000 sec  
 MCREST 0.00000000 sec  
 MCWRE 0.01500000 sec

===== CHANNEL f1 =====  
 NUC1 1H  
 P1 12.00 usec  
 PL1 -1.60 dB  
 SFO1 400.1328009 MHz

F2 - Processing parameters  
 SI 65536  
 SF 400.1300333 MHz  
 WDW no  
 SSB 0  
 LB 0.00 Hz  
 GB 0  
 PC 2.00

1D NMR plot parameters  
 CY 22.80 cm  
 CY 15.00 cm  
 F1P 9.000 ppm  
 F1 3601.17 Hz  
 F2P -1.093 ppm  
 F2 -437.51 Hz  
 PPMCM 0.44269 ppm/cm  
 HZCM 177.13533 Hz/cm

<sup>1</sup>H spectrum

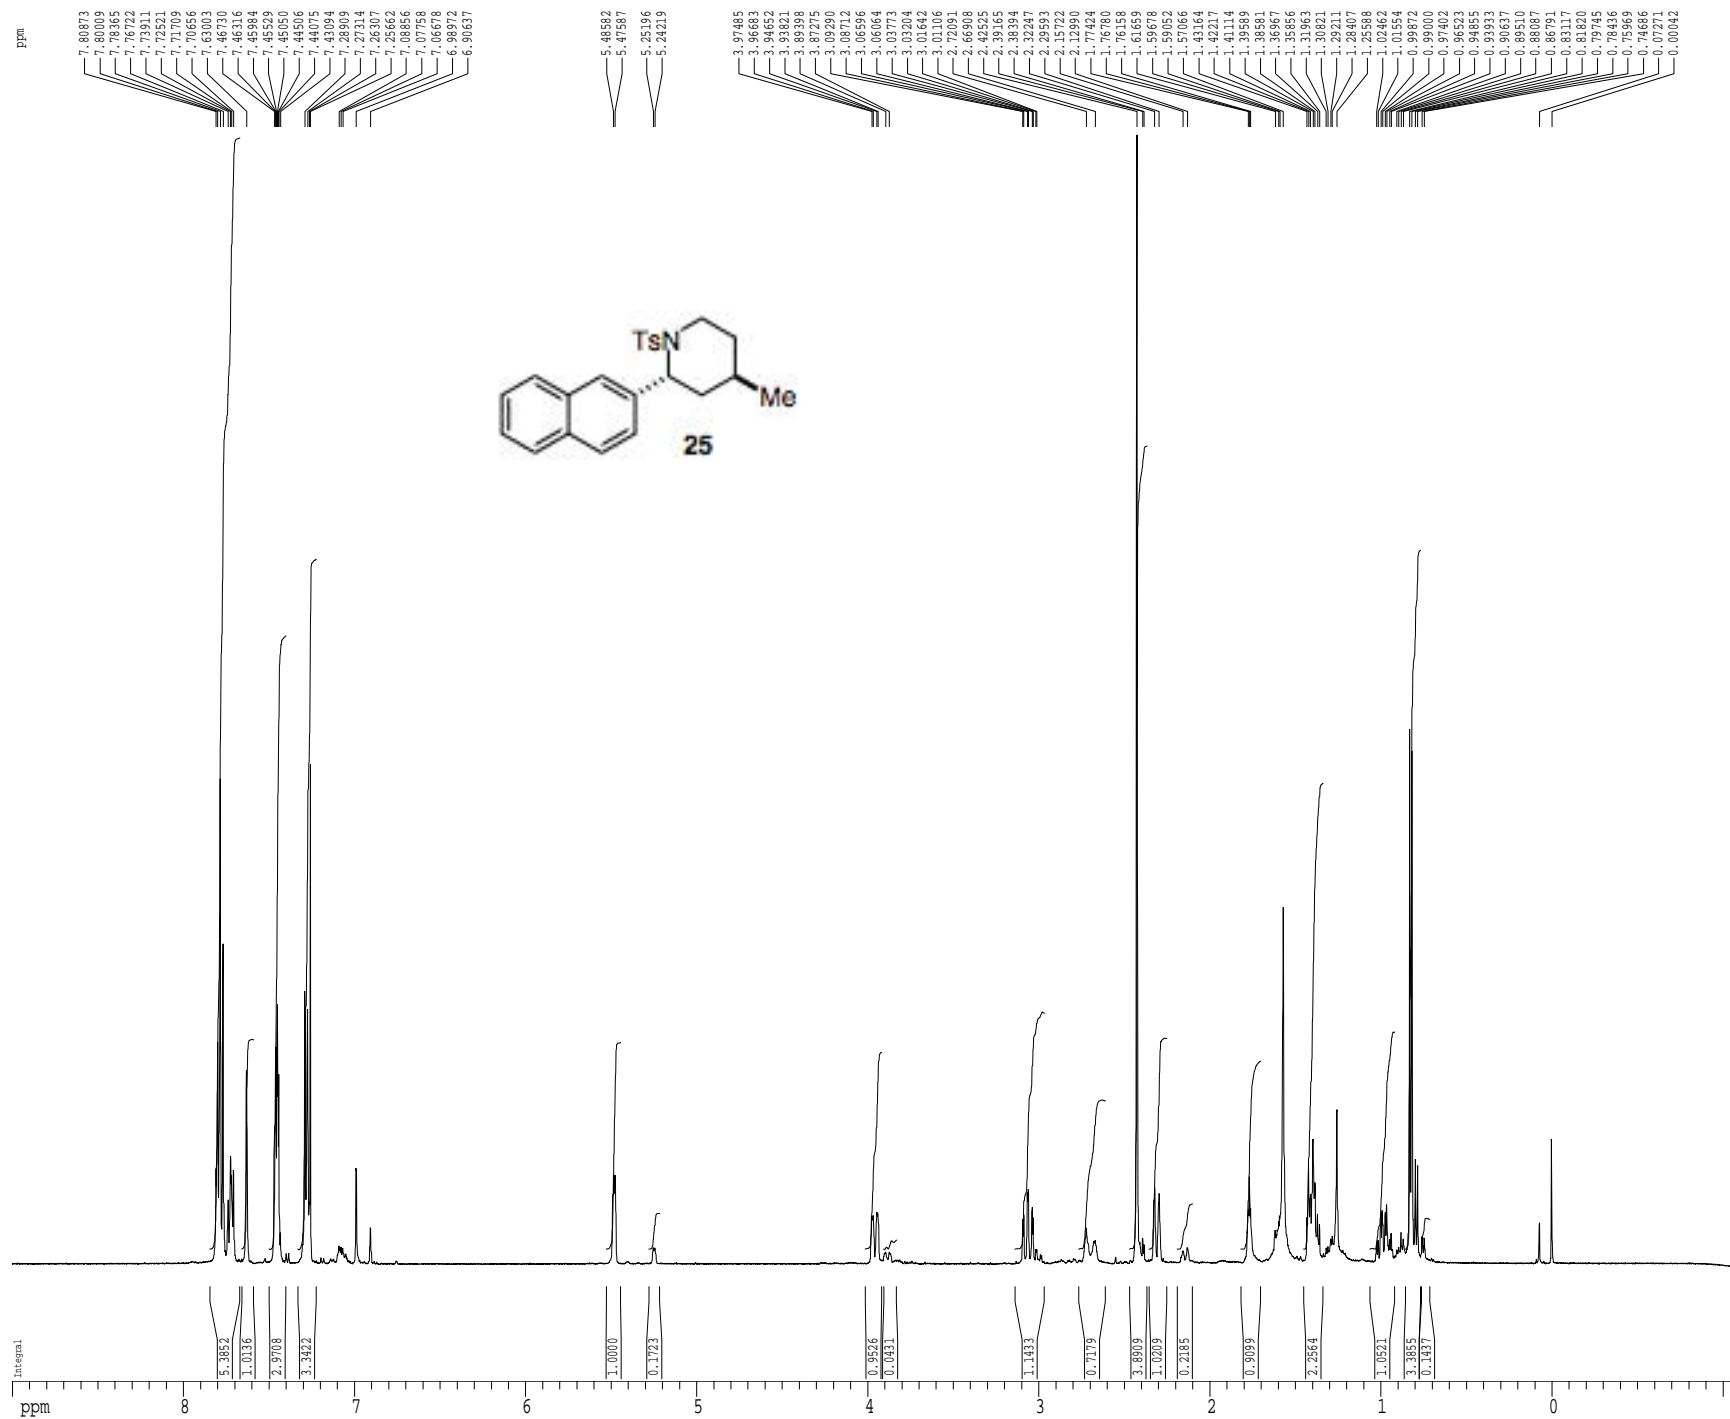

Current Data Parameters  
 USER caherber  
 NAME CAH-I-241-full  
 EXPNO 1  
 PROCNO 1

F2 - Acquisition Parameters  
 Date\_ 20210707  
 Time 11.46  
 INSTRUM cryo500  
 PROBHD 5 mm CPTCI 1H-  
 PULPROG zg30  
 TD 81728  
 SOLVENT CDCl3  
 NS 8  
 DS 2  
 SWH 8012.820 Hz  
 FIDRES 0.098043 Hz  
 AQ 5.0998774 sec  
 RG 6.3  
 DW 62.400 usec  
 DE 6.00 usec  
 TE 298.0 K  
 D1 0.10000000 sec  
 MCREST 0.00000000 sec  
 MCWRE 0.01500000 sec

===== CHANNEL f1 =====  
 NUC1 1H  
 P1 9.75 usec  
 PL1 1.60 dB  
 SFO1 500.2235015 MHz

F2 - Processing parameters  
 SI 65536  
 SF 500.2200327 MHz  
 WDW no  
 SSB 0  
 LB 0.00 Hz  
 GB 0  
 PC 1.00

1D NMR plot parameters  
 CY 22.80 cm  
 CY 15.00 cm  
 F1P 9.000 ppm  
 F1 4501.98 Hz  
 F2P -1.075 ppm  
 F2 -537.60 Hz  
 PPMCM 0.44187 ppm/cm  
 HZCM 221.03436 Hz/cm



Z-restored spin-echo 13C spectrum with 1H decoupling

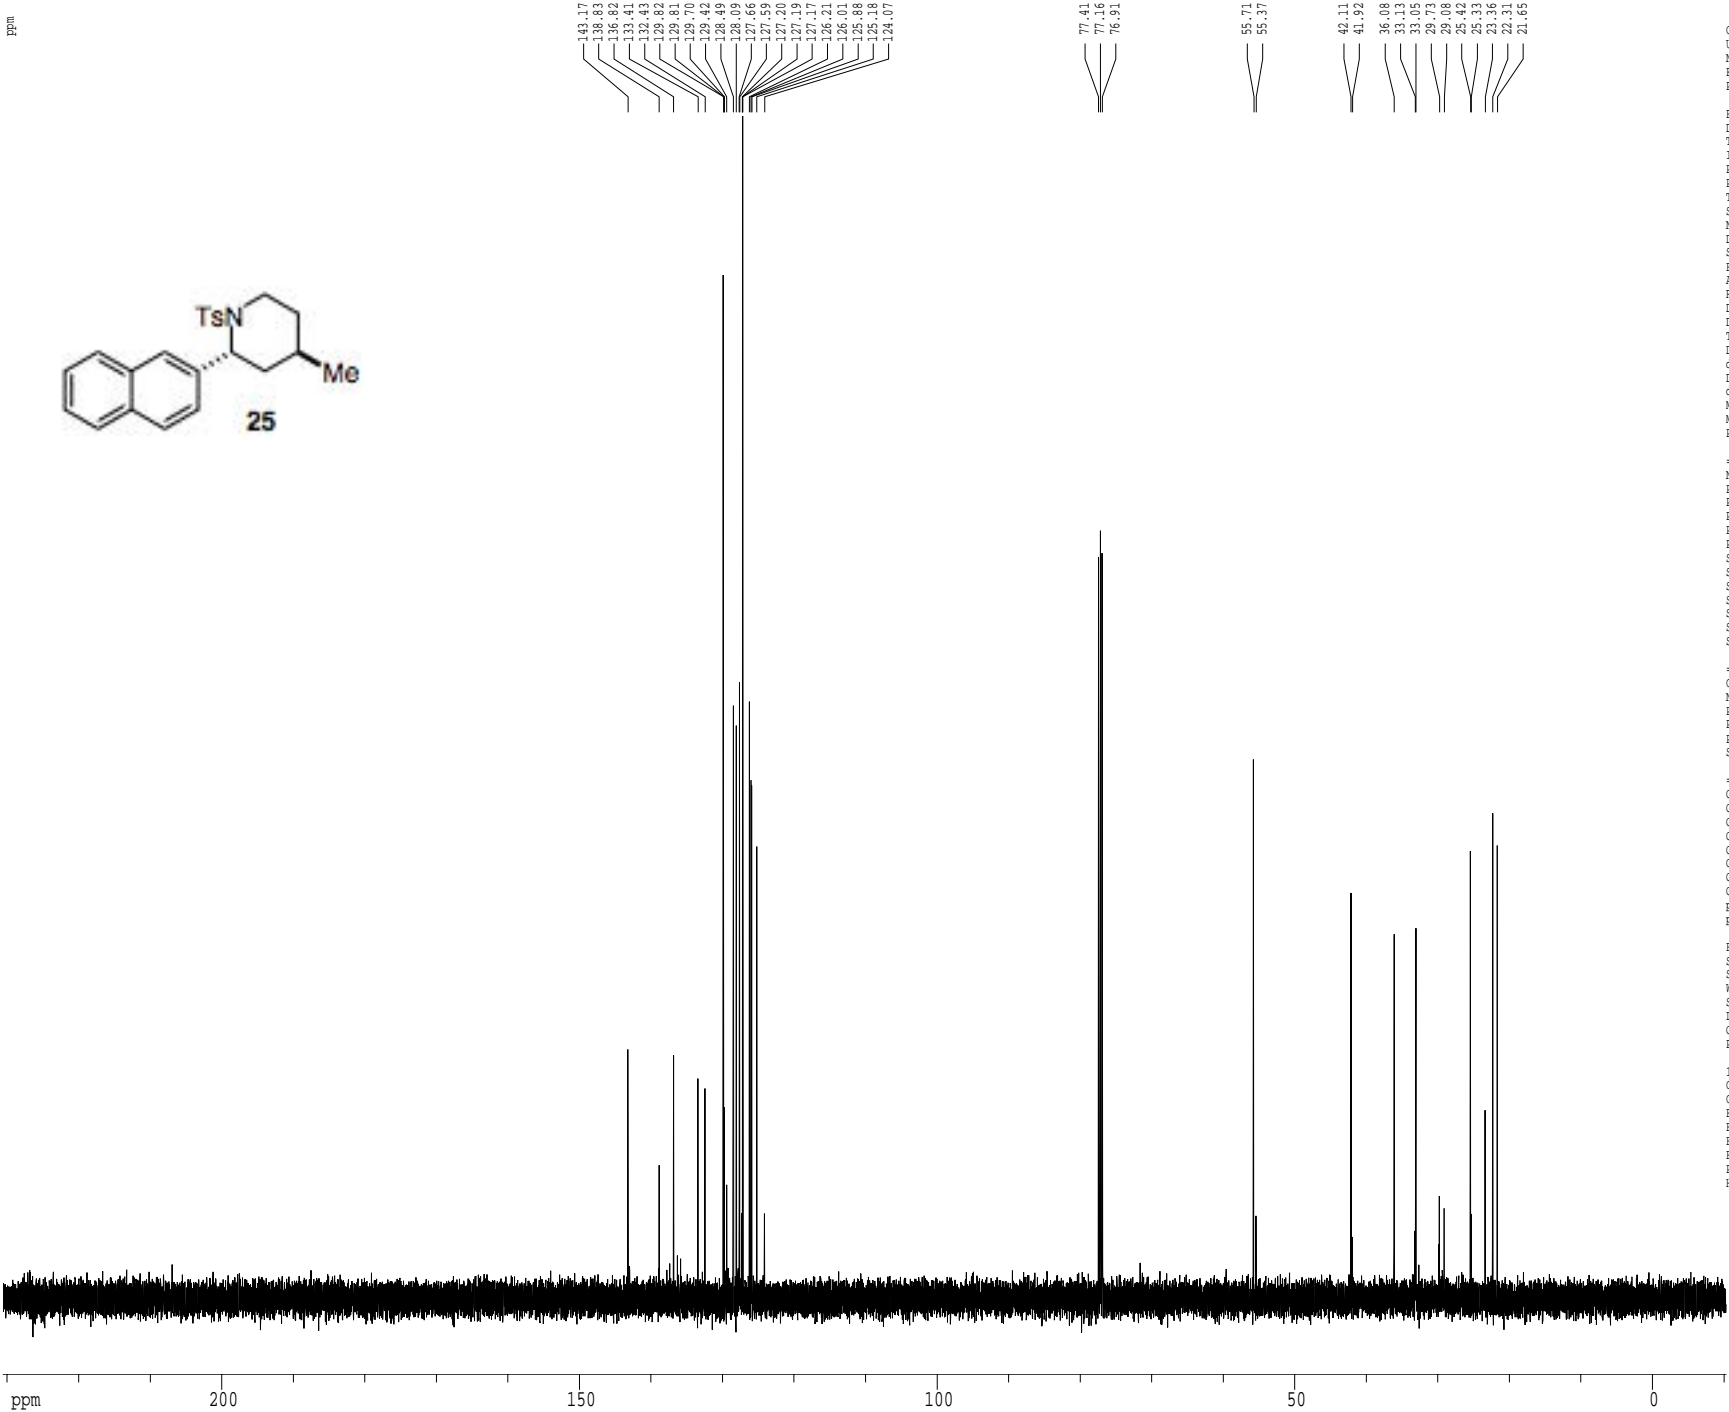

Current Data Parameters

USER caherber  
NAME CAH-I-241-full  
EXPNO 5  
PROCNO 1

F2 - Acquisition Parameters

Date\_ 20210707  
Time 13.59  
INSTRUM cryo500  
PROBHD 5 mm CPTCI 1H-  
PULPROG SpinEchopg30gp2.prd  
TD 65536  
SOLVENT CDCl3  
NS 264  
DS 16  
SWH 30303.031 Hz  
FIDRES 0.462388 Hz  
AQ 1.0813940 sec  
RG 7298.2  
DM 16.500 usec  
DE 6.00 usec  
TE 298.0 K  
D1 0.25000000 sec  
d11 0.03000000 sec  
D16 0.00020000 sec  
d17 0.00019600 sec  
MCREST 0.00000000 sec  
MCWIX 0.01500000 sec  
P2 37.70 usec

===== CHANNEL f1 =====

NUC1 13C  
P1 18.85 usec  
P12 2000.00 usec  
P20 500.00 usec  
PL0 120.00 dB  
PL1 -1.00 dB  
SP01 125.7942548 MHz  
SP2 1.55 dB  
SP4 1.55 dB  
SPNAM2 Crp60comp.4  
SPNAM4 Crp60,0.5,20.1  
SPOFF2 0.00 Hz  
SPOFF4 0.00 Hz

===== CHANNEL f2 =====

CPDPRG2 waltz16  
NUC2 1H  
PCPD2 100.00 usec  
PL2 1.60 dB  
PL12 22.00 dB  
SFO2 500.2225011 MHz

===== GRADIENT CHANNEL =====

GPAM1 SINE.100  
GPAM2 SINE.100  
GPX1 0.00 %  
GPX2 0.00 %  
GPY1 0.00 %  
GPY2 0.00 %  
GPZ1 30.00 %  
GPZ2 50.00 %  
p15 500.00 usec  
p16 1000.00 usec

F2 - Processing parameters

SI 65536  
SF 125.7804076 MHz  
WDW no  
SSB 0  
LB 0.00 Hz  
GB 0  
PC 2.00

1D NMR plot parameters

CX 22.80 cm  
CY 15.65 cm  
F1P 230.637 ppm  
F1 29009.68 Hz  
F2P -10.287 ppm  
F2 -1293.96 Hz  
PPMCM 10.56688 ppm/cm  
HZCM 1329.10693 Hz/cm

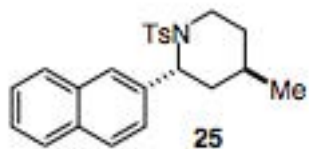

gcosy60

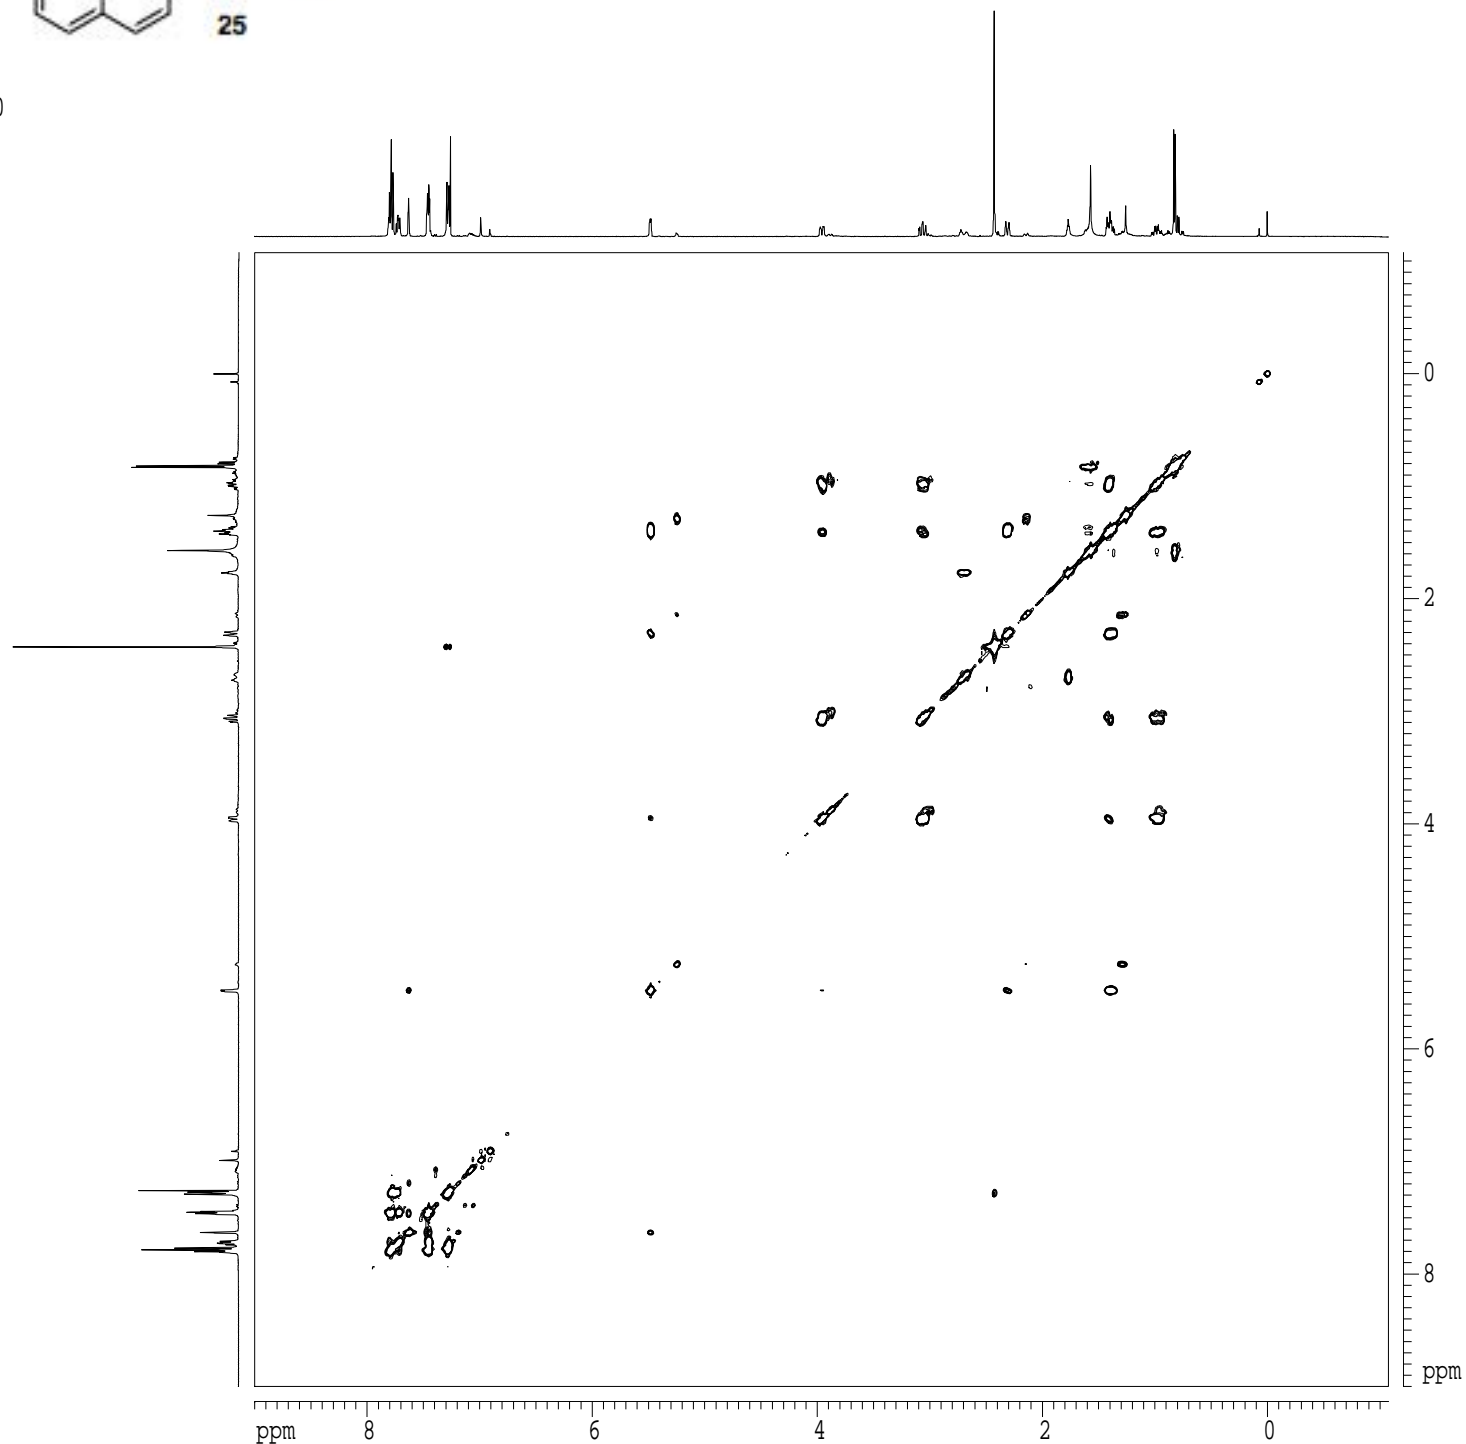

Current Data Parameters  
 USER caherber  
 NAME CAH-I-241-full  
 EXPNO 2  
 PROCNO 1

F2 - Acquisition Parameters  
 Date\_ 20210707  
 Time 11.49  
 INSTRUM cryo500  
 PROBHD 5 mm CPTCI 1H-  
 PULPROG cosygp60.prd  
 TD 2048  
 SOLVENT CDCl3  
 NS 1  
 DS 16  
 SWH 8012.820 Hz  
 FIDRES 3.912510 Hz  
 AQ 0.1278452 sec  
 RG 143.7  
 DW 62.400 usec  
 DE 6.00 usec  
 TE 298.0 K  
 d0 0.00000300 sec  
 D1 1.00000000 sec  
 d13 0.00000300 sec  
 D16 0.00020000 sec  
 IN0 0.00012480 sec

===== CHANNEL f1 =====  
 NUC1 1H  
 P1 9.75 usec  
 PL1 1.60 dB  
 SFO1 500.2235015 MHz

===== GRADIENT CHANNEL =====  
 GPNAM1 SMSQ10.100  
 GPNAM2 SMSQ10.100  
 GPX1 0.00 %  
 GPX2 0.00 %  
 GPY1 0.00 %  
 GPY2 0.00 %  
 GPZ1 17.00 %  
 GPZ2 17.00 %  
 P16 1000.00 usec

F1 - Acquisition parameters  
 ND0 1  
 TD 512  
 SFO1 500.2235 MHz  
 FIDRES 15.650040 Hz  
 SW 16.018 ppm  
 FhMODE QF

F2 - Processing parameters  
 SI 1024  
 SF 500.2200327 MHz  
 WDW SINE  
 SSB 0  
 LB 0.00 Hz  
 GB 0  
 PC 1.00

F1 - Processing parameters  
 SI 1024  
 MC2 QF  
 SF 500.2200327 MHz  
 WDW SINE  
 SSB 0  
 LB 0.00 Hz  
 GB 0

2D NMR plot parameters  
 CX2 15.00 cm  
 CX1 15.00 cm  
 F2PLO 9.000 ppm  
 F2LO 4501.98 Hz  
 F2PHI -1.075 ppm  
 F2HI -537.60 Hz  
 F1PLO 9.000 ppm  
 F1LO 4501.98 Hz  
 F1PHI -1.075 ppm  
 F1HI -537.60 Hz  
 F2PPMCM 0.67165 ppm/cm  
 F2HZCM 335.97217 Hz/cm  
 F1PPMCM 0.67165 ppm/cm  
 F1HZCM 335.97217 Hz/cm

gnoe

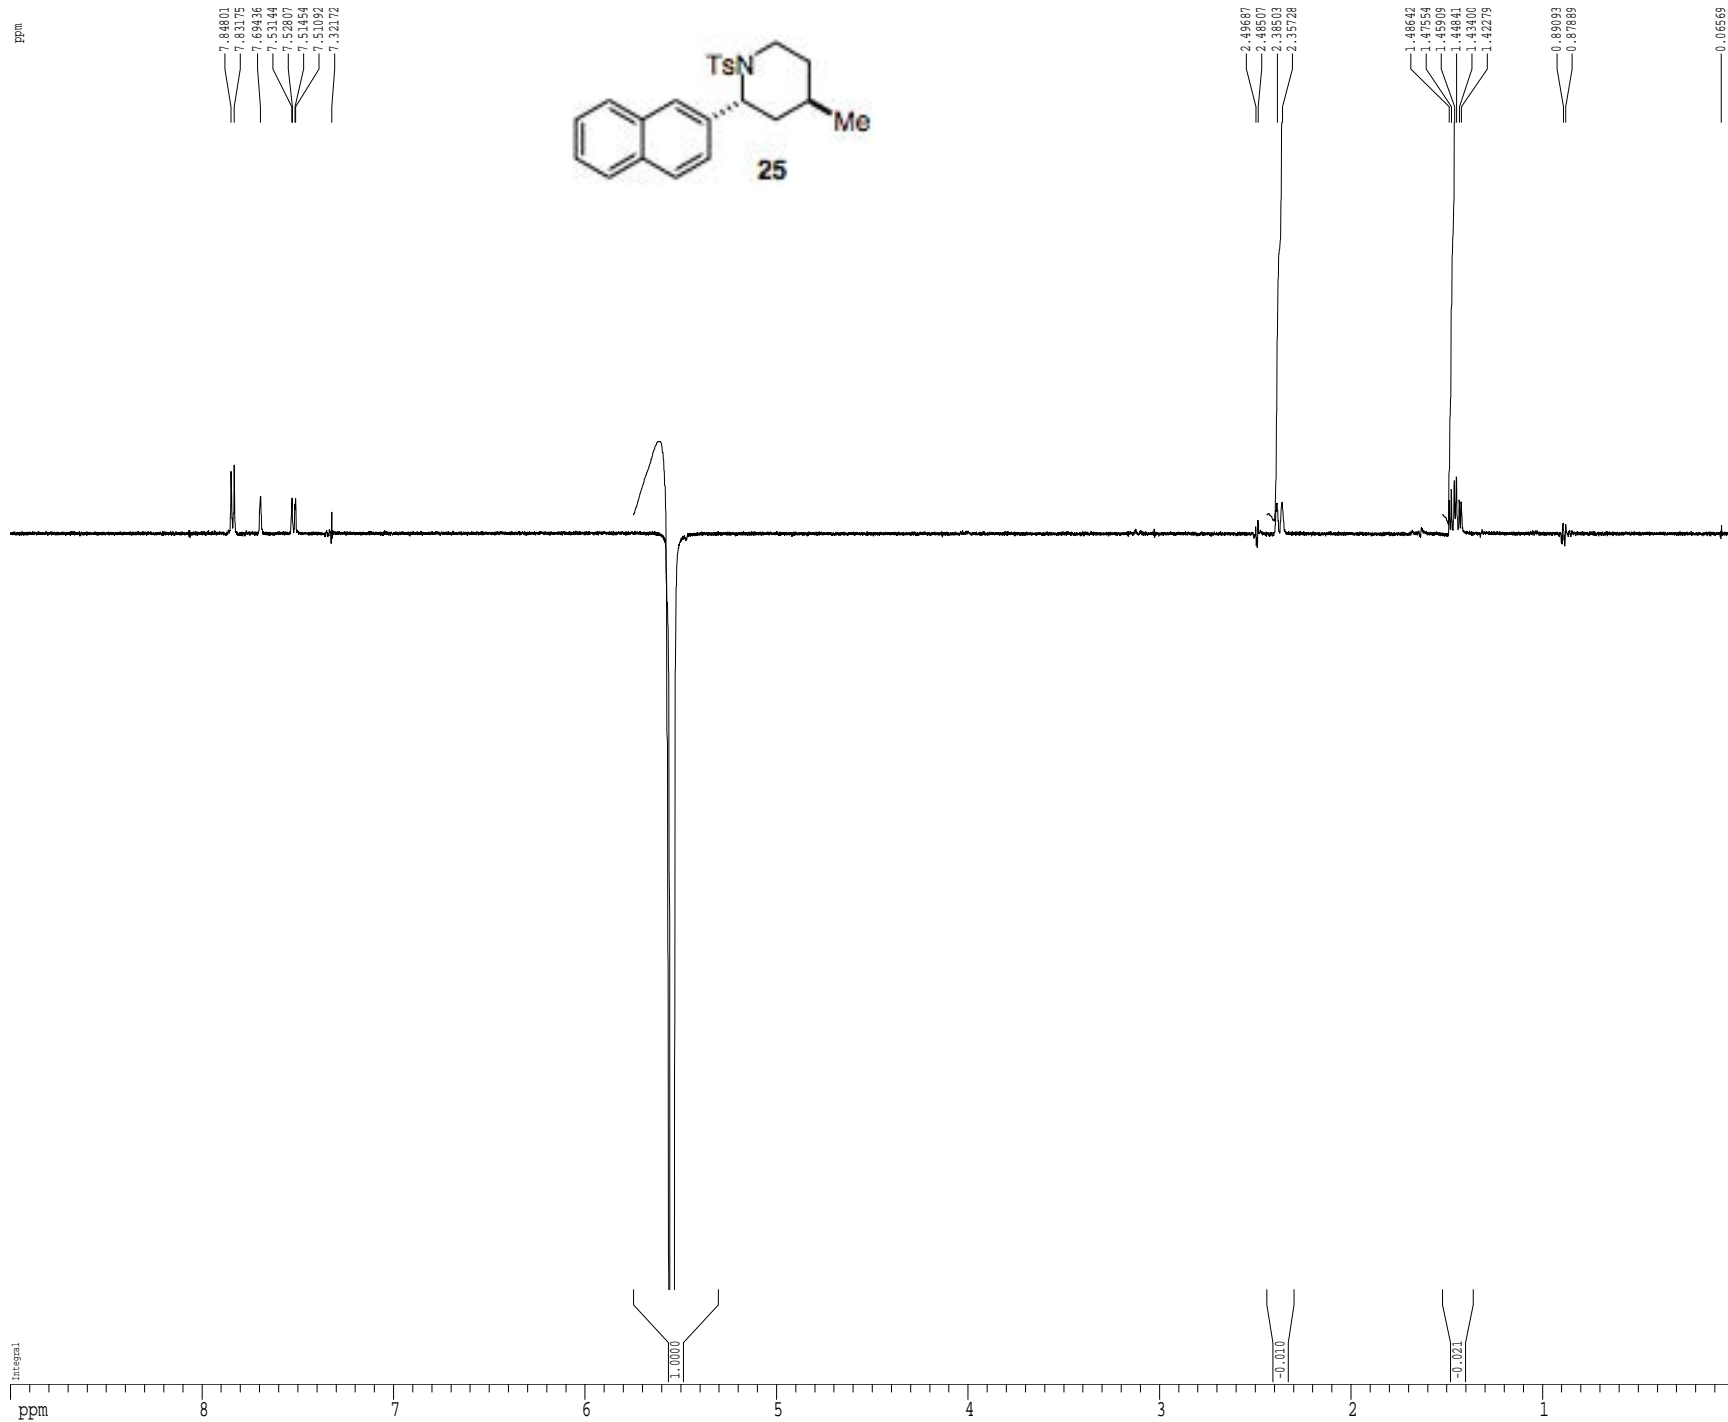

```

Current Data Parameters
NAME      CAH-1-241-full
EXPNO     4
PROCNO    1

F2 - Acquisition Parameters
Date_     20210707
Time      13.52
INSTRUM   cryo500
PROBHD    5 mm CPTCI 1H-
PULPROG   gnoe1cc22.prd
TD         65536
SOLVENT   CDCl3
NS         128
DS         8
SWH        8012.820 Hz
FIDRES     0.122266 Hz
AQ         4.0894966 sec
RG         101.6
DW         62.400 usec
DE         6.00 usec
TE         298.0 K
D1         1.00000000 sec
D8         0.50000000 sec
D16        0.00020000 sec
d21        0.33375451 sec
d22        0.16399699 sec
p2         19.50 usec

===== CHANNEL f1 =====
NUC1       1H
P1         9.75 usec
p3         29.25 usec
p4         39.00 usec
p5         26.00 usec
P29        40000.00 usec
PL1        1.60 dB
SF01       500.2227742 MHz
SP9        60.00 dB
SPNAM9     gauss1.512
SPOFF9     0.00 Hz

===== GRADIENT CHANNEL =====
GPNAM1     SMSQ10.100
GPNAM2     SMSQ10.100
GPNAM3     SMSQ10.100
GPNAM4     SMSQ10.100
GPX1       0.00 %
GPX2       0.00 %
GPX3       0.00 %
GPX4       0.00 %
GPY1       0.00 %
GPY2       0.00 %
GPY3       0.00 %
GPY4       0.00 %
GPZ1       7.00 %
GPZ2       3.00 %
GPZ3       2.30 %
GPZ4       -2.30 %
P16        1000.00 usec

F2 - Processing parameters
SI         65536
SF         500.2200000 MHz
WDW        no
SSB        0
LB         0.00 Hz
GB         0
PC         1.00

1D NMR plot parameters
CX         22.80 cm
CY         50.00 cm
F1P        9.000 ppm
F1         4501.98 Hz
F2P        0.000 ppm
F2         0.00 Hz
PPMCM      0.39474 ppm/cm
HZCM       197.45528 Hz/cm
  
```

# <sup>1</sup>H spectrum

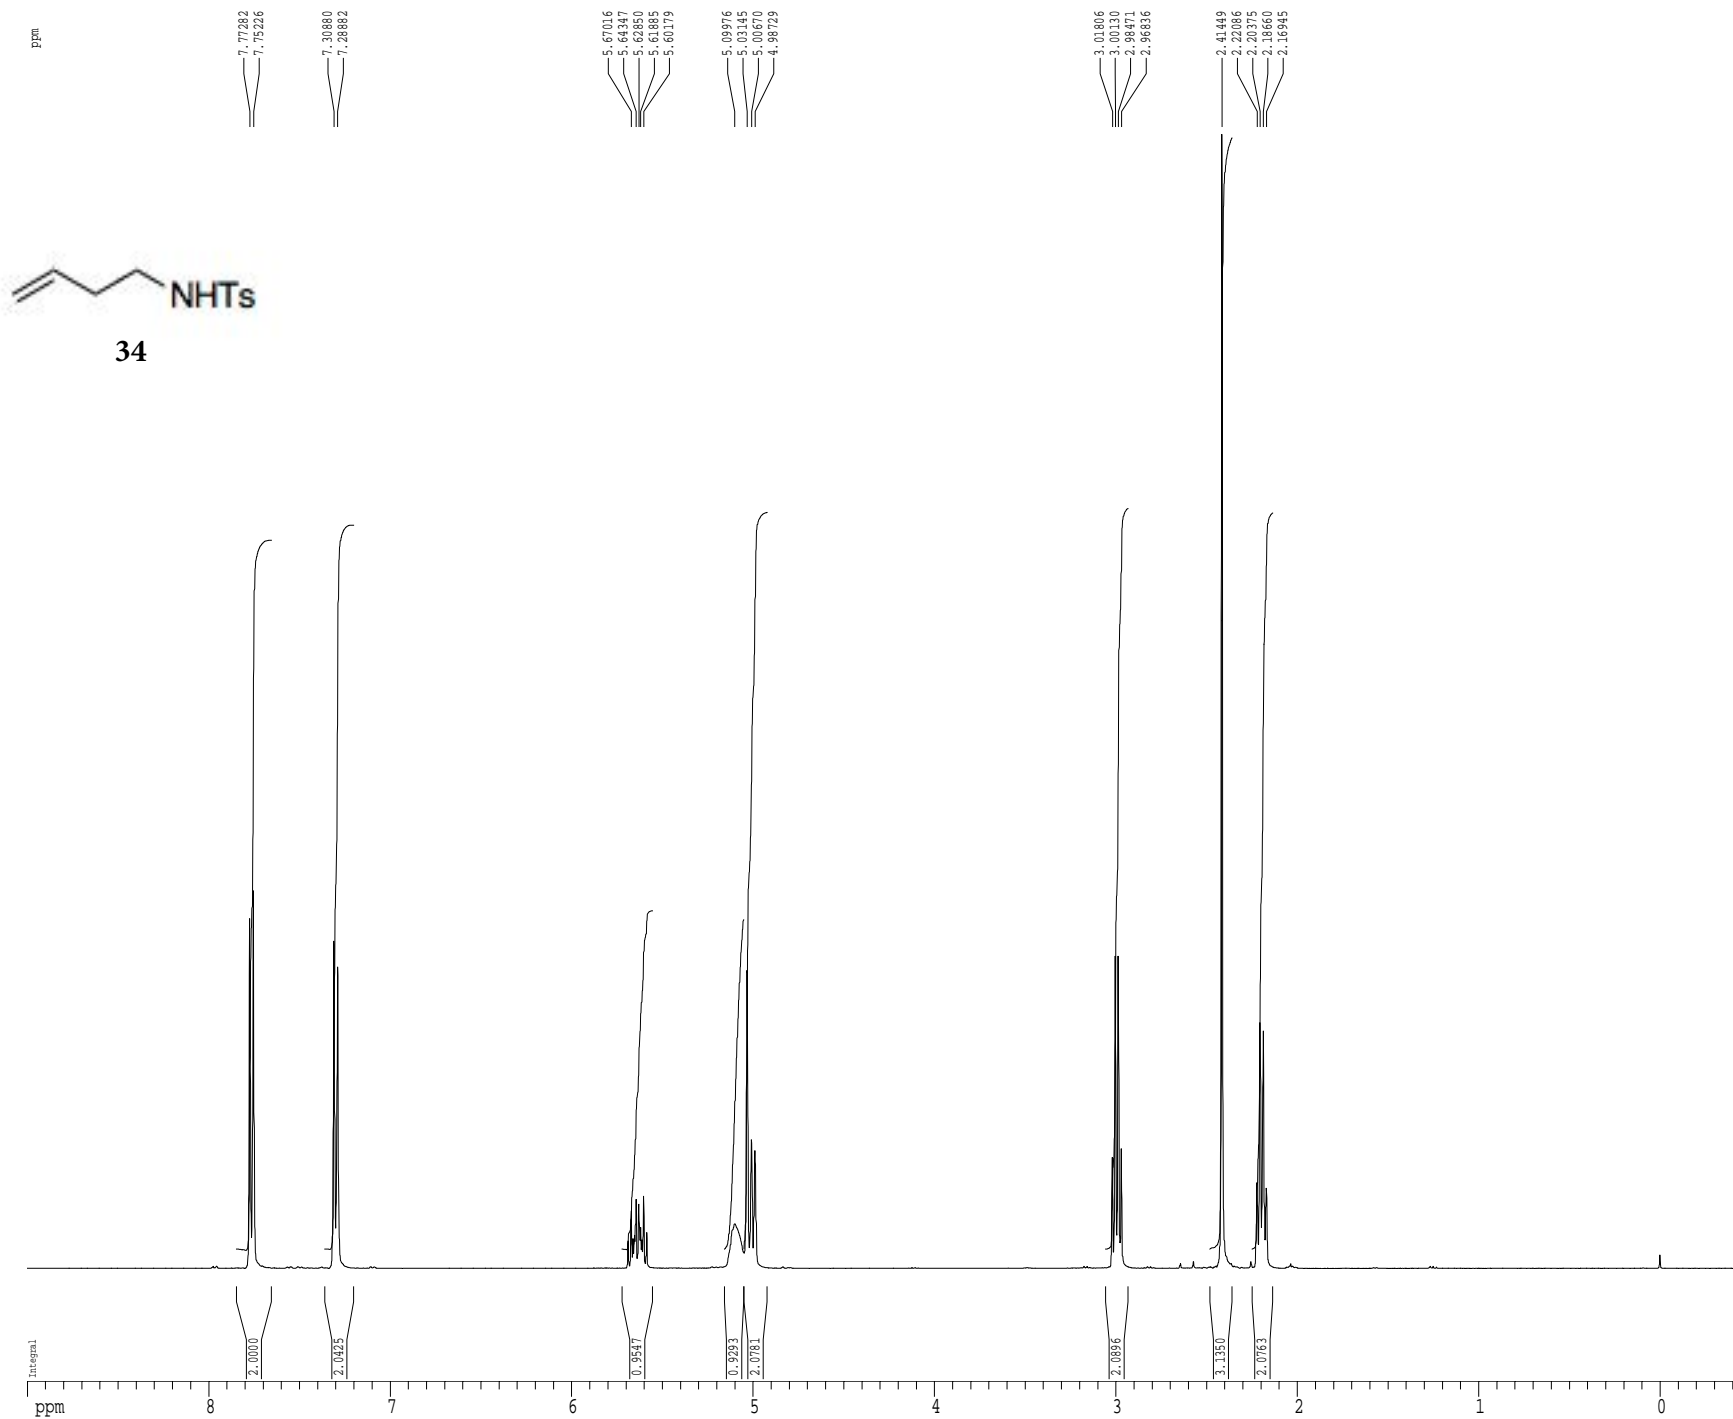

```

Current Data Parameters
USER      khewitt1
NAME      KAH-i-102Z
EXPNO     1
PROCNO    1

F2 - Acquisition Parameters
Date_     20180922
Time      12.03
INSTRUM   drx400
PROBHD    5 mm QNP H/F/P
PULPROG   zg30
TD         38460
SOLVENT   CDC13T
NS         8
DS         2
SWH        6410.256 Hz
FIDRES     0.166673 Hz
AQ         2.9999299 sec
RG         32
DW         78.000 usec
DE         4.50 usec
TE         297.9 K
D1         0.10000000 sec
MCREST    0.00000000 sec
MCWREK    0.01500000 sec

===== CHANNEL f1 =====
NUC1      1H
P1        12.00 usec
PL1       -1.10 dB
SFO1      400.1328009 MHz

F2 - Processing parameters
SI         65536
SF         400.1300086 MHz
WDW        no
SSB        0
LB         0.00 Hz
GB         0
PC         2.00

1D NMR plot parameters
CY         22.80 cm
CY         15.00 cm
F1P        9.000 ppm
F1         3601.17 Hz
F2P        -0.500 ppm
F2         -200.06 Hz
PPMCM      0.41667 ppm/cm
HZCM       166.72084 Hz/cm
    
```

# <sup>1</sup>H spectrum

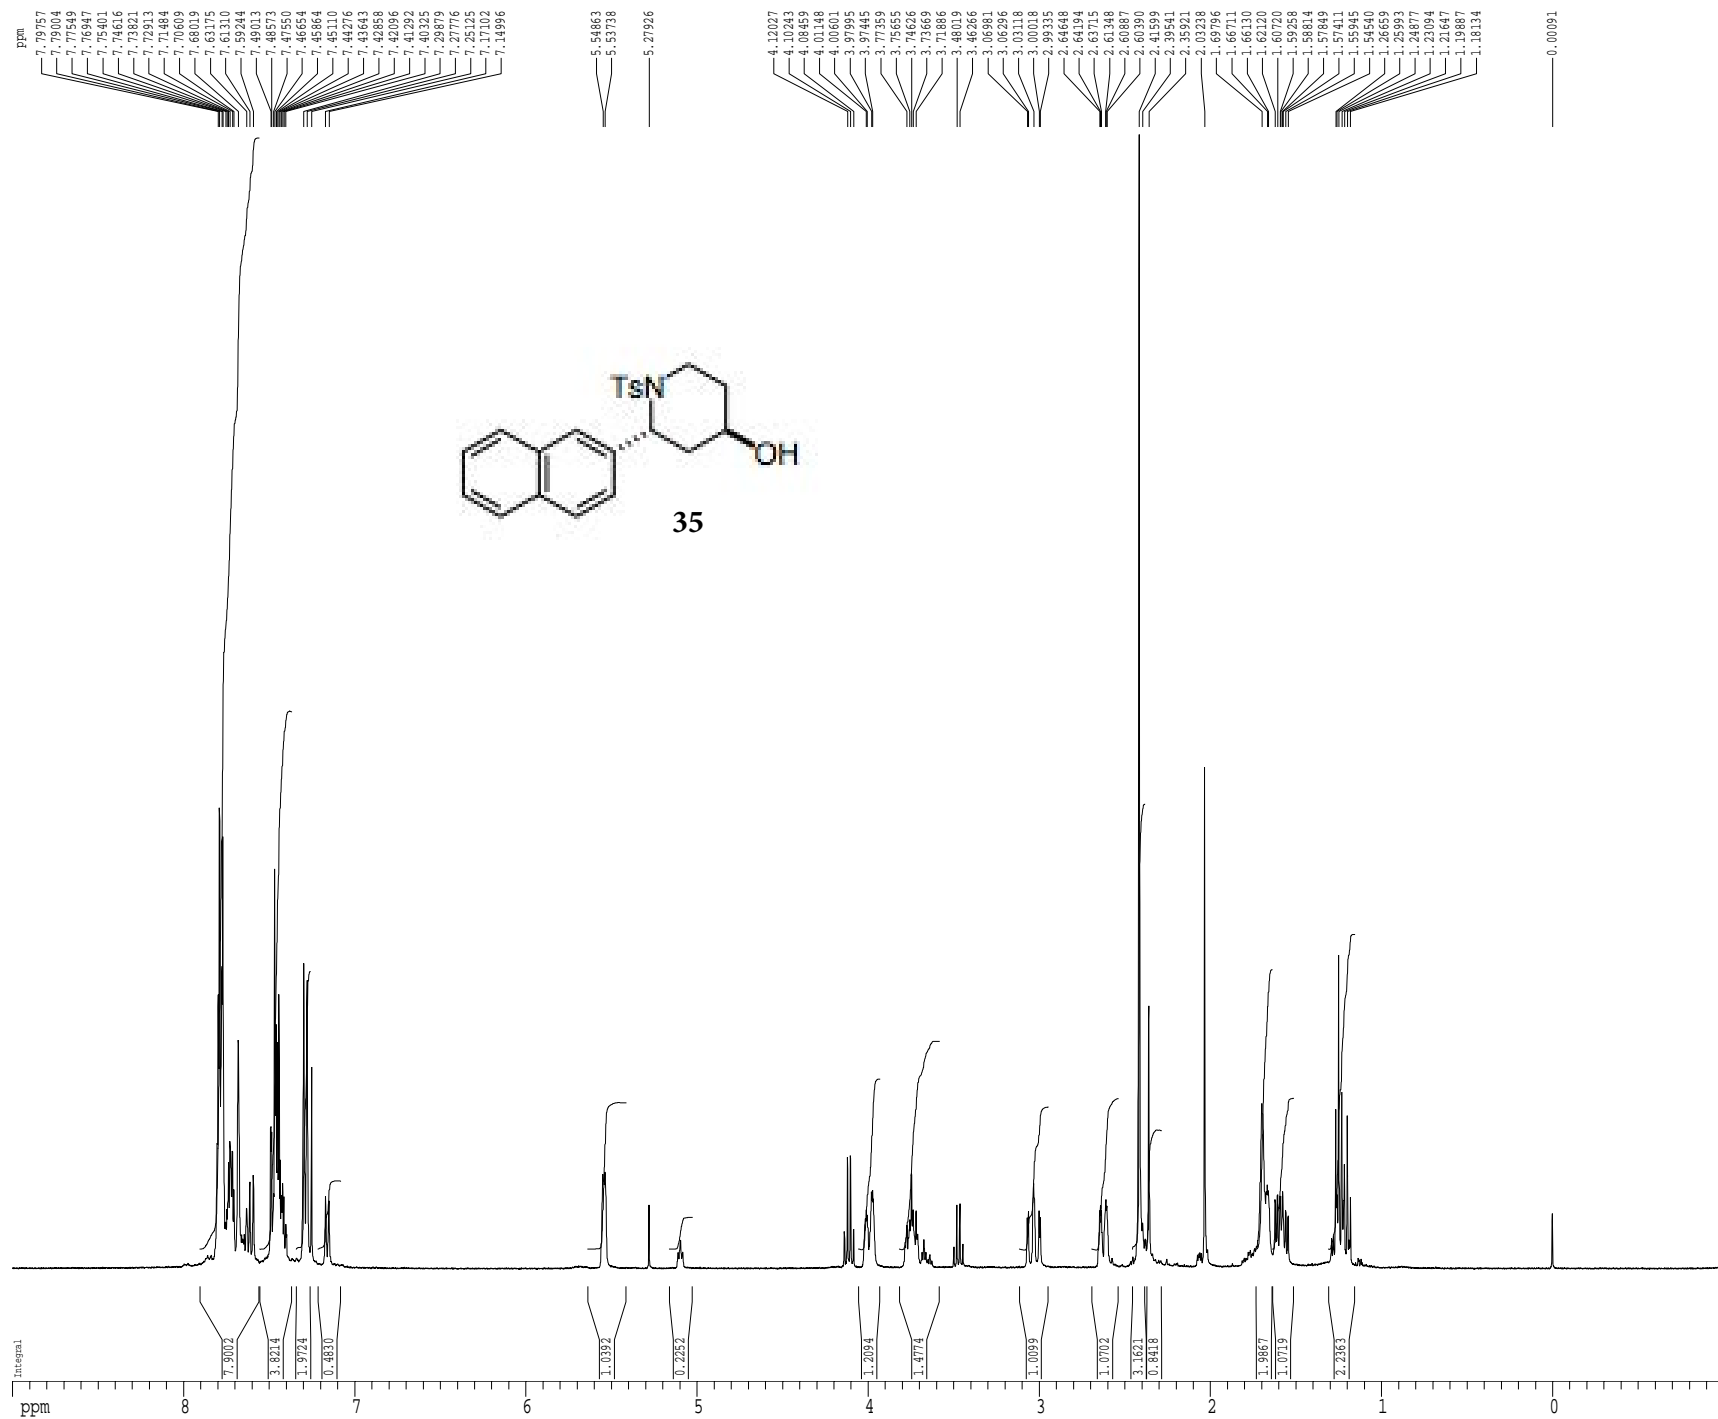

Current Data Parameters  
 USER caherber  
 NAME CAH-I-201  
 EXPNO 1  
 PROCNO 1

F2 - Acquisition Parameters  
 Date\_ 20210330  
 Time 18.04  
 INSTRUM drx400  
 PROBHD 5 mm QNP H/P/P  
 PULPROG zg30  
 TD 65536  
 SOLVENT CDCl3  
 NS 8  
 DS 2  
 SWH 6410.256 Hz  
 FIDRES 0.097813 Hz  
 AQ 5.1118579 sec  
 RG 128  
 DW 78.000 usec  
 DE 4.50 usec  
 TE 298.0 K  
 D1 0.10000000 sec  
 MCREST 0.00000000 sec  
 MCWREK 0.01500000 sec

===== CHANNEL f1 =====  
 NUC1 1H  
 P1 12.00 usec  
 PL1 -1.60 dB  
 SFO1 400.1328009 MHz

F2 - Processing parameters  
 SI 65536  
 SF 400.1300245 MHz  
 WDW no  
 SSB 0  
 LB 0.00 Hz  
 GB 0  
 PC 2.00

1D NMR plot parameters  
 CY 22.80 cm  
 CY 15.00 cm  
 F1P 9.000 ppm  
 F1 3601.17 Hz  
 F2P -1.071 ppm  
 F2 -428.71 Hz  
 PPMCM 0.44173 ppm/cm  
 HZCM 176.74925 Hz/cm

Z-restored spin-echo 13C spectrum with 1H decoupling

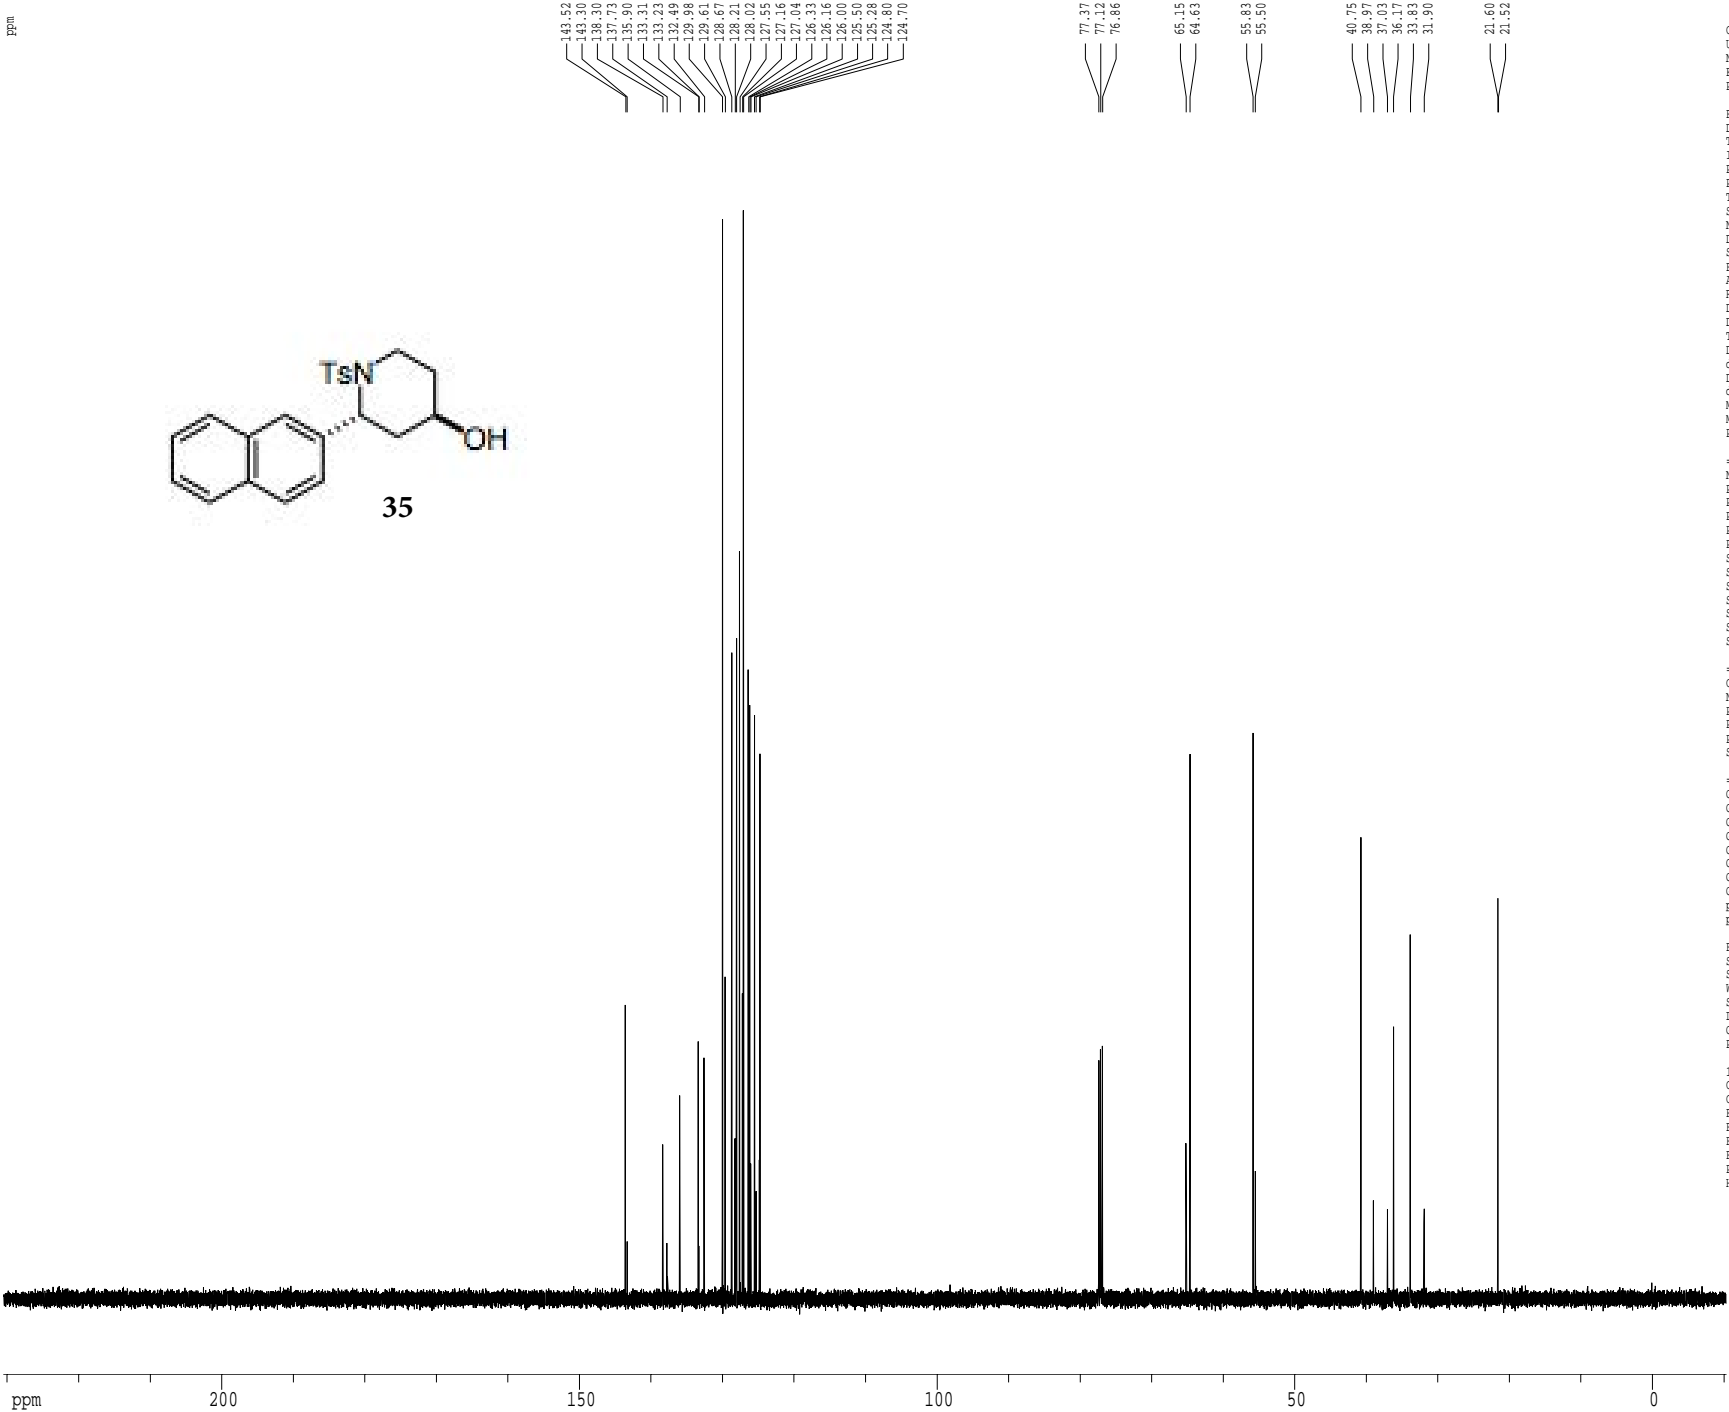

Current Data Parameters

USER caherber  
NAME CAH-1-202-13C  
EXPNO 1  
PROCNO 1

F2 - Acquisition Parameters

Date\_ 20210828  
Time 14.09  
INSTRUM cryo500  
PROBHD 5 mm CPTCI 1H-  
PULPROG SpinEchopg30gp2.prd  
TD 65536  
SOLVENT CDCl3  
NS 200  
DS 16  
SWH 30303.031 Hz  
FIDRES 0.462388 Hz  
AQ 1.0813940 sec  
RG 13004  
DM 16.500 usec  
DE 6.00 usec  
TE 298.0 K  
D1 0.25000000 sec  
d11 0.03000000 sec  
D16 0.00020000 sec  
d17 0.00019600 sec  
MCREST 0.00000000 sec  
MCWEX 0.01500000 sec  
P2 37.70 usec

===== CHANNEL f1 =====

NUC1 13C  
P1 18.85 usec  
P12 2000.00 usec  
P20 500.00 usec  
PL0 120.00 dB  
PL1 -1.00 dB  
SFO1 125.7942548 MHz  
SP2 1.55 dB  
SP4 1.55 dB  
SPNAM2 Crp60comp.4  
SPNAM4 Crp60,0.5,20.1  
SPOFF2 0.00 Hz  
SPOFF4 0.00 Hz

===== CHANNEL f2 =====

CPDPRG2 waltz16  
NUC2 1H  
PCPD2 100.00 usec  
PL2 1.60 dB  
PL12 22.00 dB  
SFO2 500.2225011 MHz

===== GRADIENT CHANNEL =====

GPNAM1 SINE.100  
GPNAM2 SINE.100  
GPX1 0.00 %  
GPX2 0.00 %  
GPY1 0.00 %  
GPY2 0.00 %  
GPZ1 30.00 %  
GPZ2 50.00 %  
p15 500.00 usec  
p16 1000.00 usec

F2 - Processing parameters

SI 65536  
SF 125.7804190 MHz  
WDW no  
SSB 0  
LB 0.00 Hz  
GB 0  
PC 2.00

1D NMR plot parameters

CX 22.80 cm  
CY 15.65 cm  
F1P 230.637 ppm  
F1 29009.68 Hz  
F2P -10.287 ppm  
F2 -1293.96 Hz  
PPMCM 10.56688 ppm/cm  
HZCM 1329.10706 Hz/cm

<sup>1</sup>H spectrum

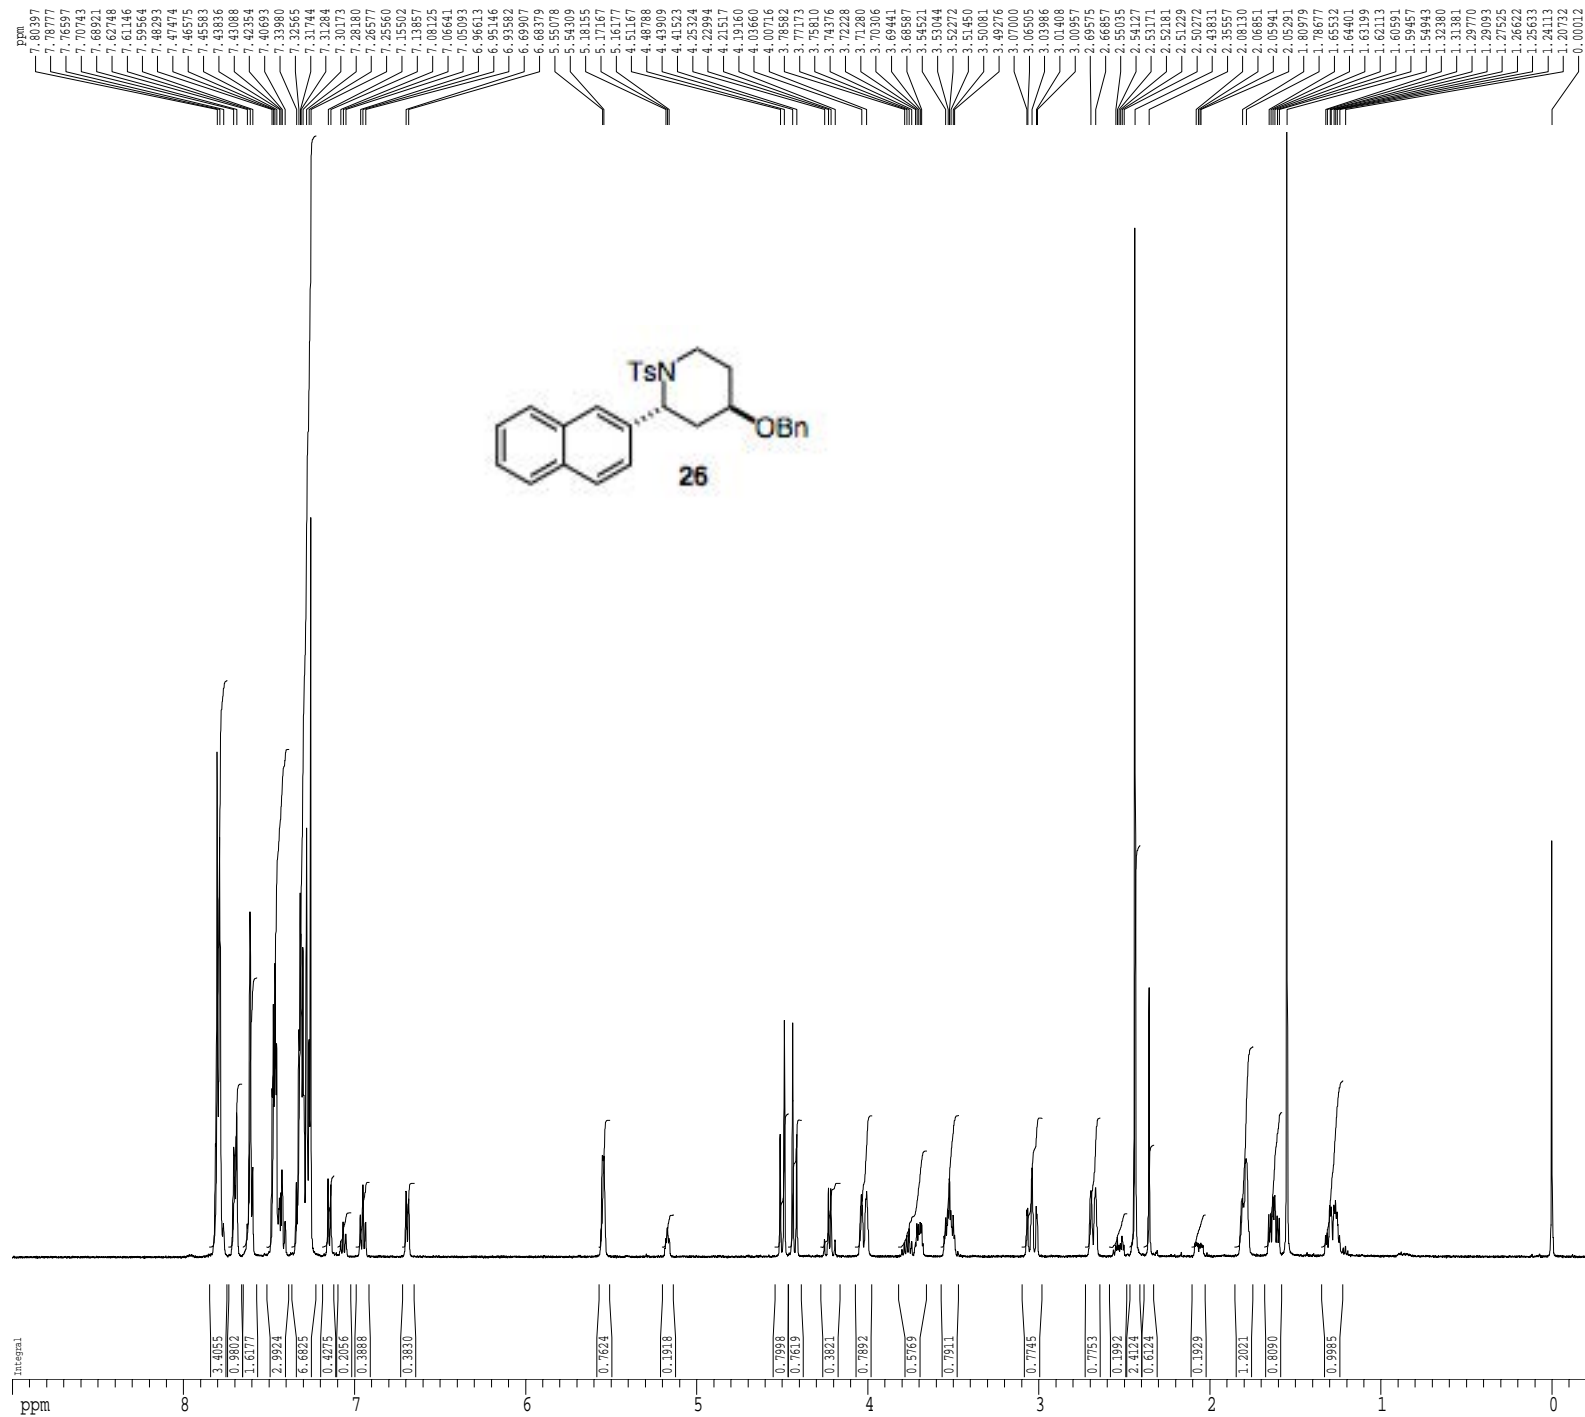

Current Data Parameters  
 USER caherber  
 NAME CAH-I-236-full  
 EXPNO 1  
 PROCNO 1

F2 - Acquisition Parameters  
 Date\_ 20210616  
 Time 7.56  
 INSTRUM cryo500  
 PROBHD 5 mm CPTCI 1H-  
 PULPROG zg30  
 TD 48074  
 SOLVENT CDCl3  
 NS 8  
 DS 2  
 SWH 8012.820 Hz  
 FIDRES 0.166677 Hz  
 AQ 2.9998677 sec  
 RG 5.7  
 DW 62.400 usec  
 DE 6.00 usec  
 TE 298.0 K  
 D1 0.10000000 sec  
 MCREST 0.00000000 sec  
 MCWRE 0.01500000 sec

===== CHANNEL f1 =====  
 NUC1 1H  
 P1 9.75 usec  
 PL1 1.60 dB  
 SFO1 500.2235015 MHz

F2 - Processing parameters  
 SI 65536  
 SF 500.2200329 MHz  
 WDW no  
 SSB 0  
 LB 0.00 Hz  
 GB 0  
 PC 1.00

1D NMR plot parameters  
 CY 22.80 cm  
 CY 15.00 cm  
 F1P 9.000 ppm  
 F1 4501.98 Hz  
 F2P -1.075 ppm  
 F2 -537.73 Hz  
 PPMCM 0.44189 ppm/cm  
 HZCM 221.03986 Hz/cm

# Z-restored spin-echo 13C spectrum with 1H decoupling

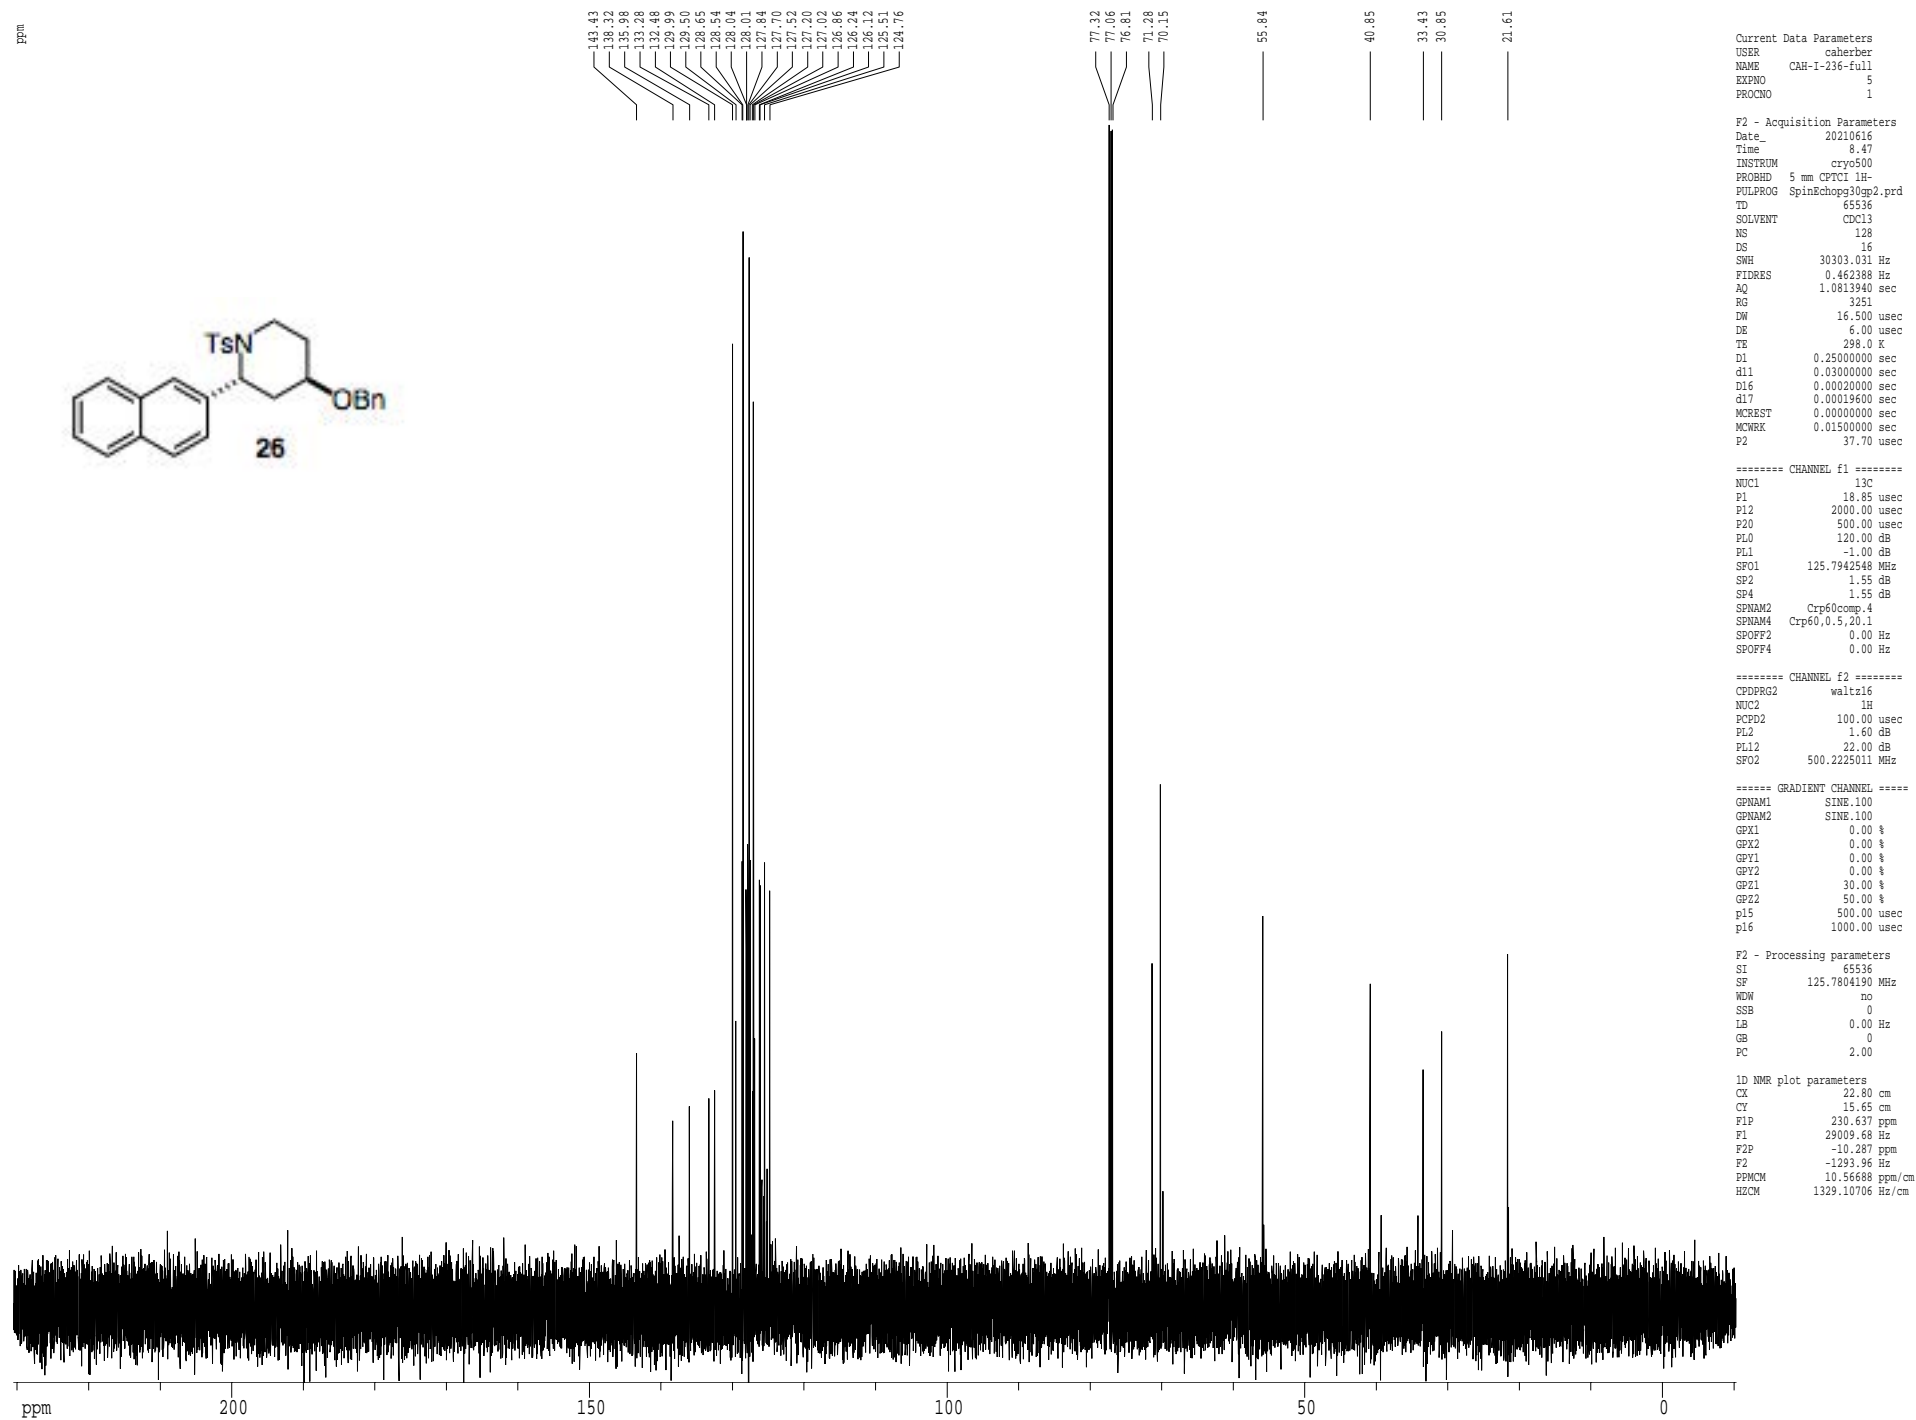



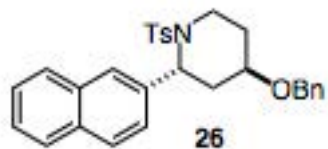

gcosy60

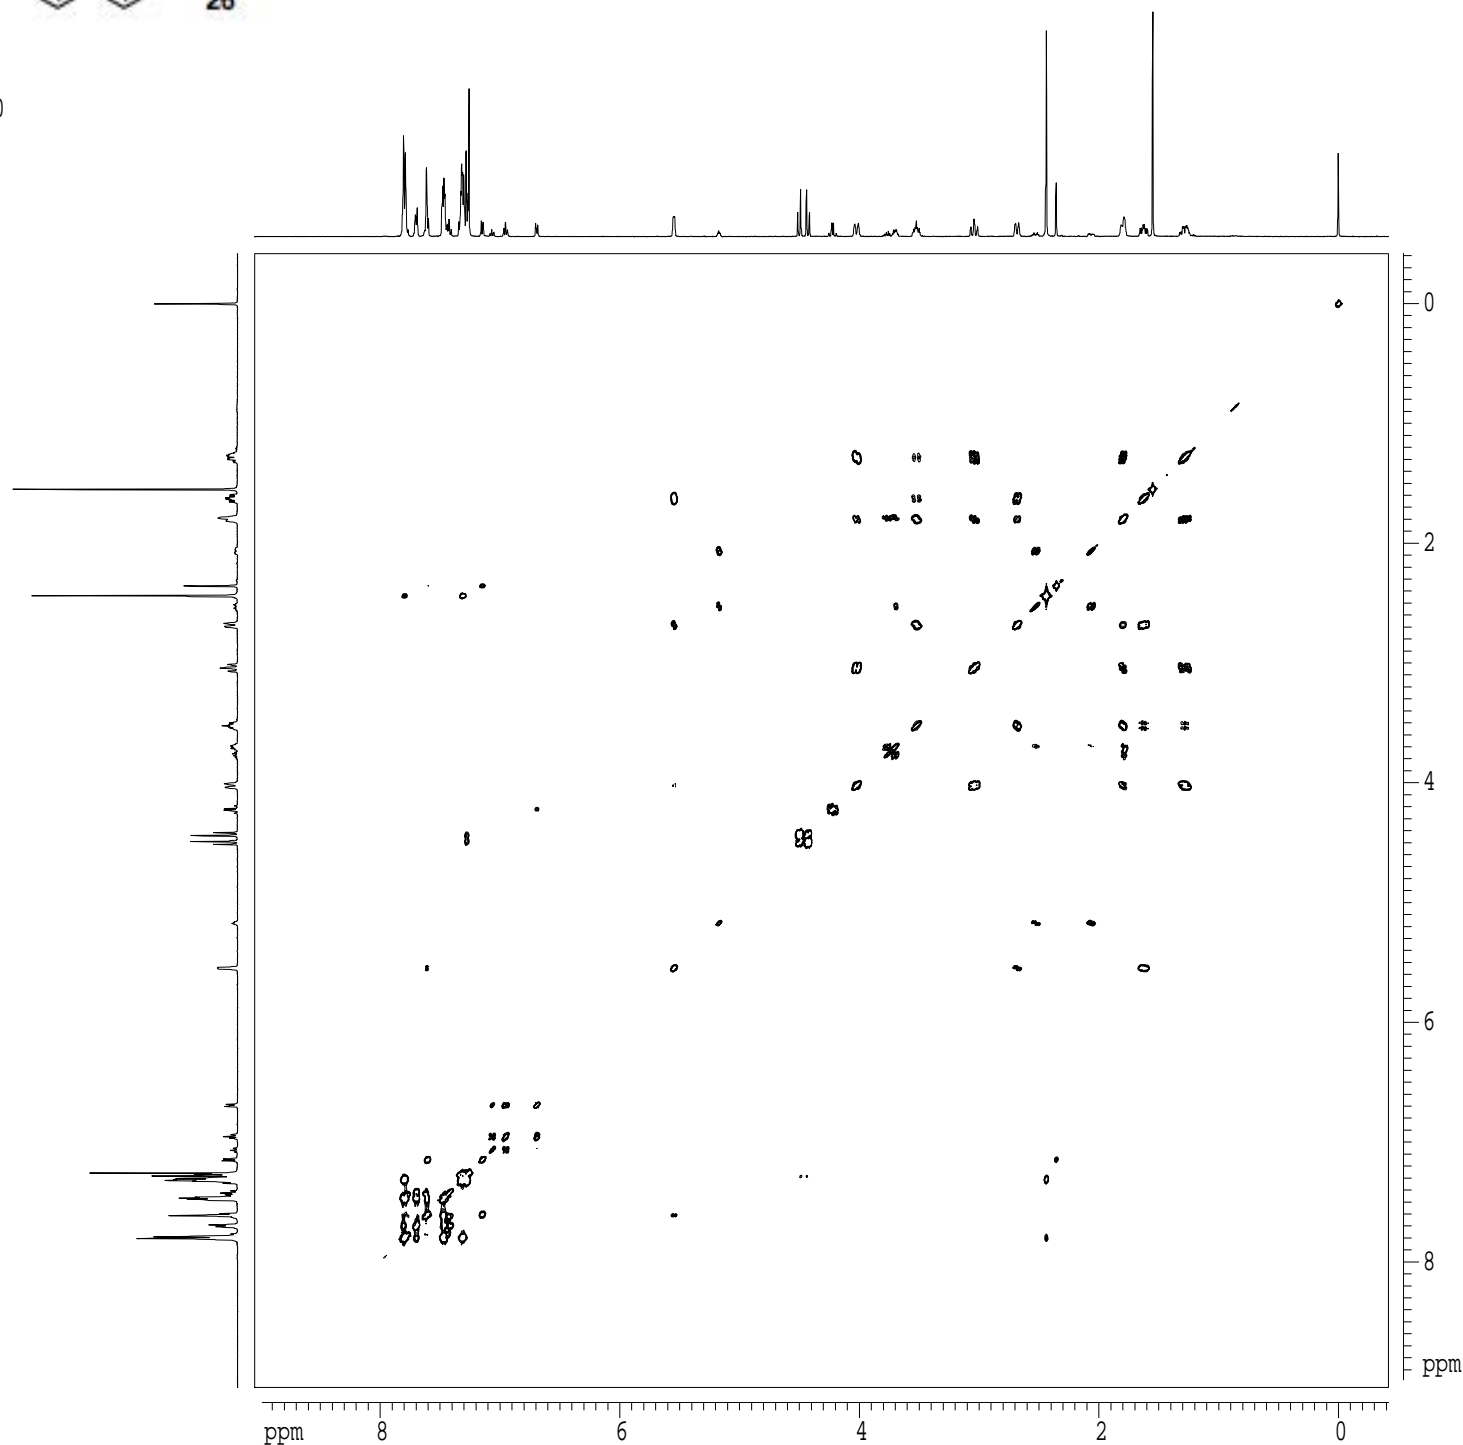

Current Data Parameters  
 USER caherber  
 NAME CAH-I-236-full  
 EXPNO 2  
 PROCNO 1

F2 - Acquisition Parameters  
 Date\_ 20210616  
 Time 8.03  
 INSTRUM cryo500  
 PROBHD 5 mm CPTCI 1H-  
 PULPROG cosygp60.prd  
 TD 2048  
 SOLVENT CDCl3  
 NS 1  
 DS 16  
 SWH 4734.849 Hz  
 FIDRES 2.311938 Hz  
 AQ 0.2163188 sec  
 RG 322.5  
 DW 105.600 usec  
 DE 6.00 usec  
 TE 298.0 K  
 d0 0.00000300 sec  
 D1 1.00000000 sec  
 d13 0.00000300 sec  
 D16 0.00020000 sec  
 IN0 0.00021120 sec

===== CHANNEL f1 =====  
 NUC1 1H  
 P1 9.75 usec  
 PL1 1.60 dB  
 SF01 500.2221588 MHz

===== GRADIENT CHANNEL =====  
 GPNAM1 SMSQ10.100  
 GPNAM2 SMSQ10.100  
 GPX1 0.00 %  
 GPX2 0.00 %  
 GPY1 0.00 %  
 GPY2 0.00 %  
 GPZ1 17.00 %  
 GPZ2 17.00 %  
 P16 1000.00 usec

F1 - Acquisition parameters  
 ND0 1  
 TD 512  
 SF01 500.2222 MHz  
 FIDRES 9.247751 Hz  
 SW 9.465 ppm  
 FhMODE QF

F2 - Processing parameters  
 SI 1024  
 SF 500.2200329 MHz  
 WDW SINE  
 SSB 0  
 LB 0.00 Hz  
 GB 0  
 PC 1.00

F1 - Processing parameters  
 SI 1024  
 MC2 QF  
 SF 500.2200329 MHz  
 WDW SINE  
 SSB 0  
 LB 0.00 Hz  
 GB 0

2D NMR plot parameters  
 CX2 15.00 cm  
 CX1 15.00 cm  
 F2PLO 9.048 ppm  
 F2LO 4526.21 Hz  
 F2PHI -0.417 ppm  
 F2HI -208.63 Hz  
 F1PLO 9.048 ppm  
 F1LO 4526.21 Hz  
 F1PHI -0.417 ppm  
 F1HI -208.63 Hz  
 F2PPMCM 0.63104 ppm/cm  
 F2HZCM 315.65659 Hz/cm  
 F1PPMCM 0.63104 ppm/cm  
 F1HZCM 315.65659 Hz/cm

gnoe

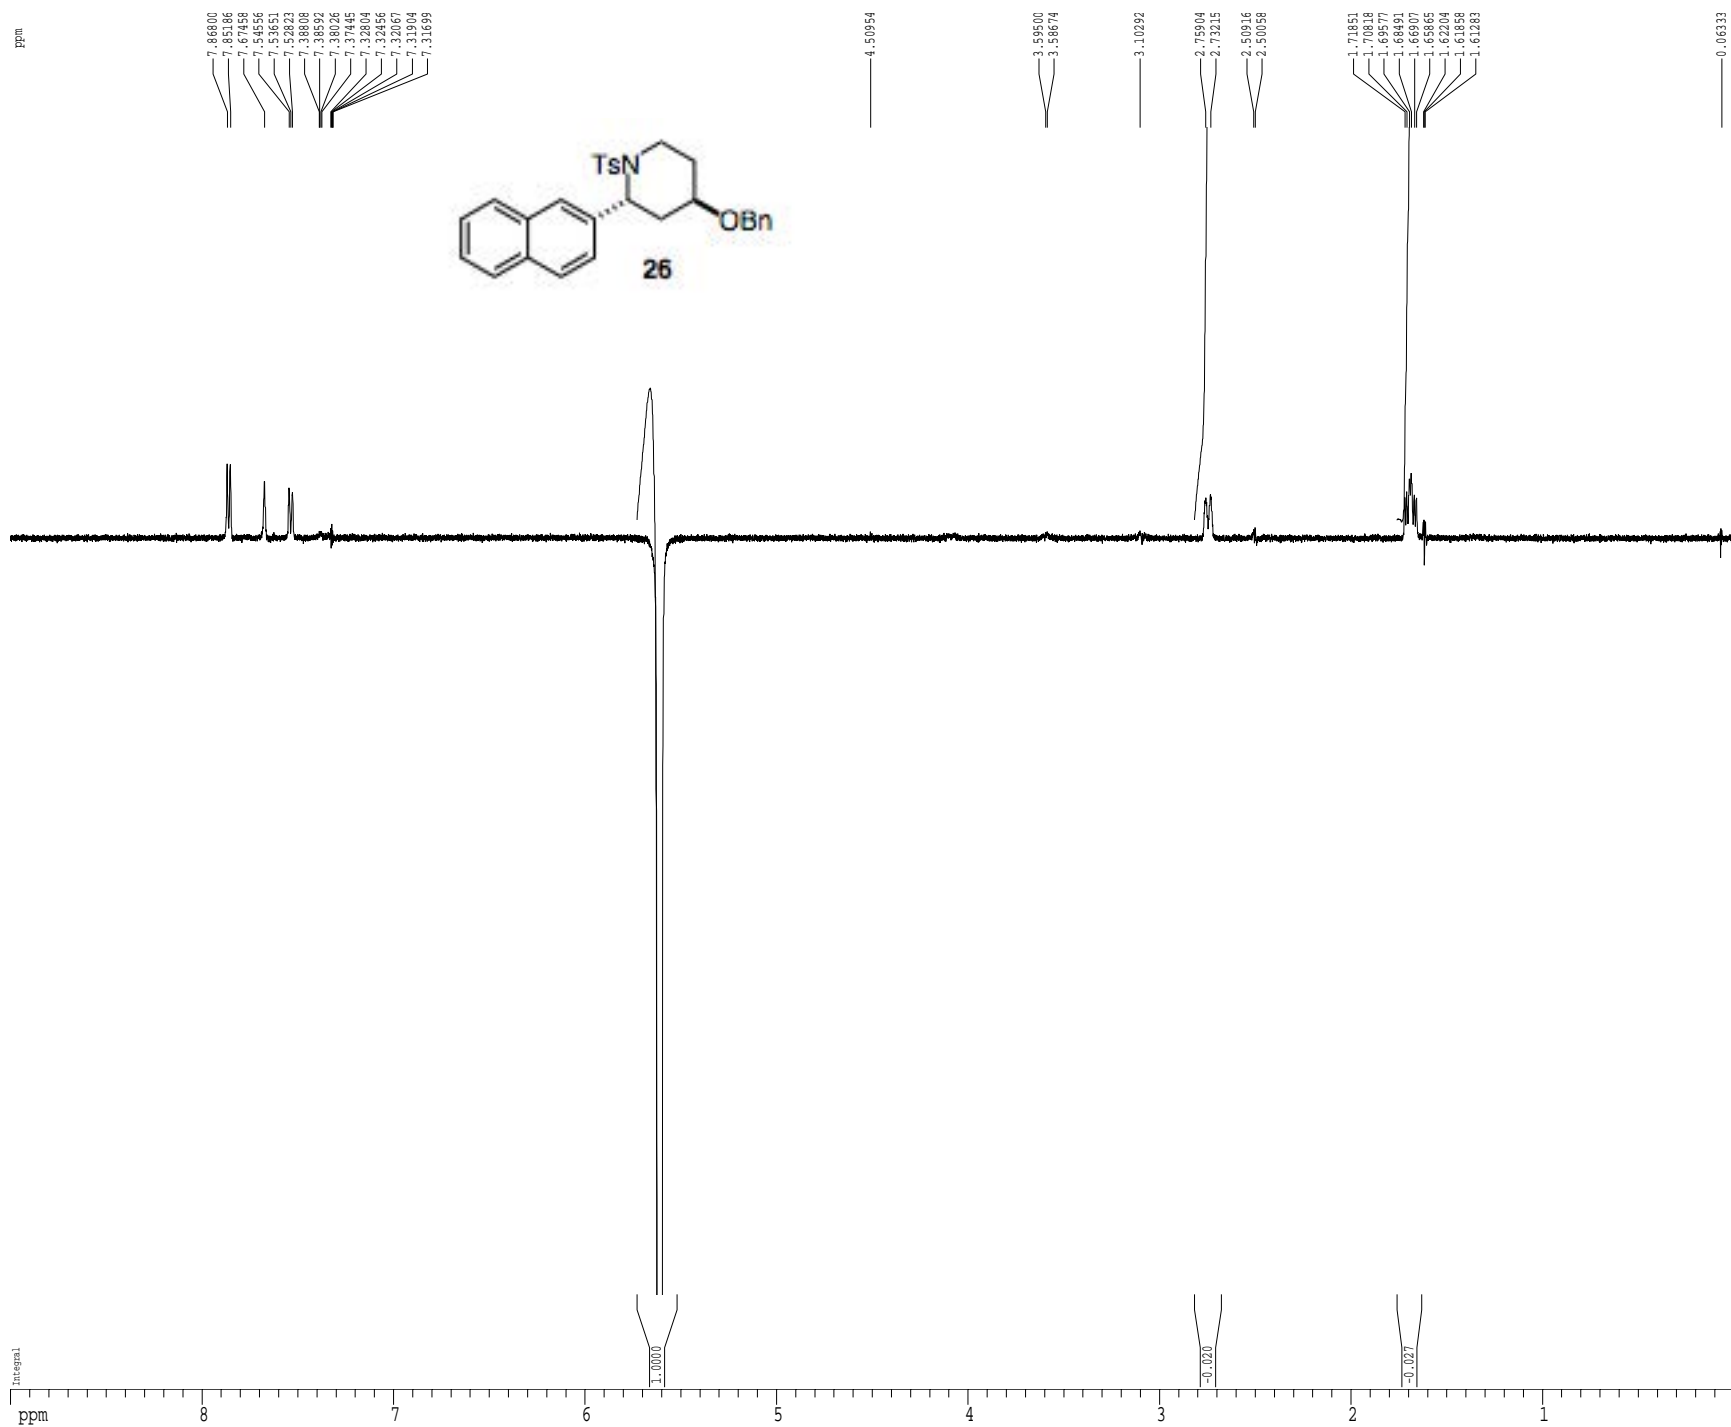

```

Current Data Parameters
USER          caherber
NAME          CAH-I-236-full
EXPNO         3
PROCNO        1

F2 - Acquisition Parameters
Date_         20210616
Time          8.29
INSTRUM       cryo500
PROBHD        5 mm CPTCI 1H-
PULPROG       gnoe1cc22.prd
TD            65536
SOLVENT       CDCl3
NS            128
DS            8
SWH           8012.820 Hz
FIDRES        0.122266 Hz
AQ            4.0894966 sec
RG            161.3
DW            62.400 usec
DE            6.00 usec
TE            298.0 K
D1            1.00000000 sec
D8            0.50000000 sec
D16           0.00020000 sec
d21           0.33375451 sec
d22           0.16399699 sec
p2            19.50 usec

===== CHANNEL f1 =====
NUC1          1H
P1            9.75 usec
P3            29.25 usec
P4            39.00 usec
P5            26.00 usec
P29           40000.00 usec
PL1           1.60 dB
SF01          500.2228073 MHz
SP9           60.00 dB
SPNAM9        gauss1.512
SPOFF9        0.00 Hz

===== GRADIENT CHANNEL =====
GPNAM1        SMSQ10.100
GPNAM2        SMSQ10.100
GPNAM3        SMSQ10.100
GPNAM4        SMSQ10.100
GPX1          0.00 %
GPX2          0.00 %
GPX3          0.00 %
GPX4          0.00 %
GPY1          0.00 %
GPY2          0.00 %
GPY3          0.00 %
GPY4          0.00 %
GPZ1          7.00 %
GPZ2          3.00 %
GPZ3          2.30 %
GPZ4          -2.30 %
P16           1000.00 usec

F2 - Processing parameters
SI            65536
SF            500.2200000 MHz
WDW           no
SSB           0
LB            0.00 Hz
GB            0
PC            1.00

1D NMR plot parameters
CX            22.80 cm
CY            50.00 cm
F1P           9.000 ppm
F1            4501.98 Hz
F2P           0.000 ppm
F2            0.00 Hz
PPMCM         0.39474 ppm/cm
HZCM          197.45528 Hz/cm
  
```

# <sup>1</sup>H spectrum

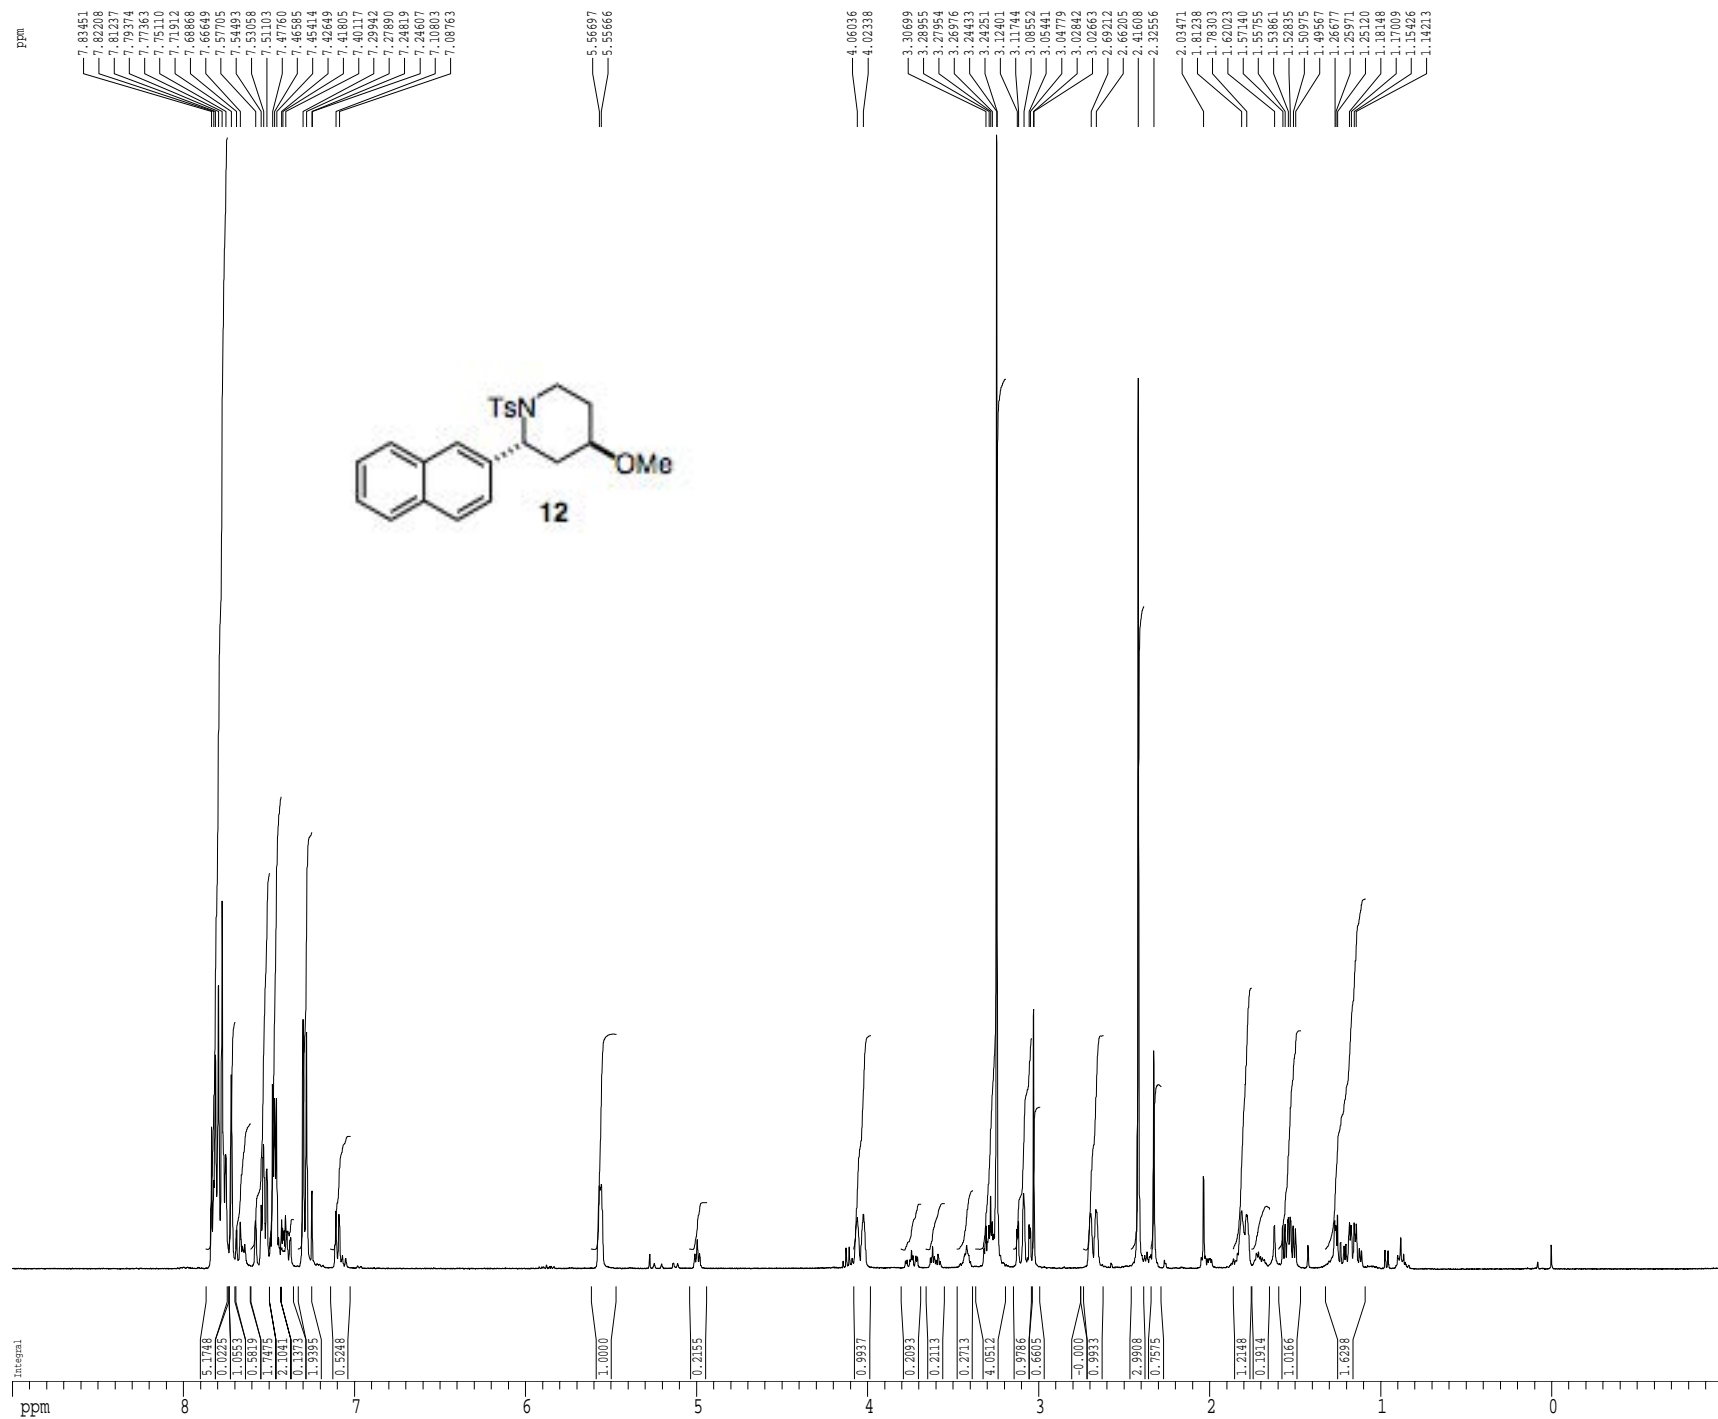

```

Current Data Parameters
USER          caherbet
NAME          CAH-I-209
EXPNO        1
PROCNO       1

F2 - Acquisition Parameters
Date_         20210415
Time          17.05
INSTRUM       drx400
PROBHD        5 mm QNP H/F/P
PULPROG       zg30
TD            65536
SOLVENT       CDCl3
NS            8
DS            2
SWH           6410.256 Hz
FIDRES        0.097813 Hz
AQ           5.1118579 sec
RG            114
DW           78.000 usec
DE           4.50 usec
TE           298.0 K
D1           0.10000000 sec
MCREST       0.00000000 sec
MCWREK       0.01500000 sec

===== CHANNEL f1 =====
NUC1          1H
P1           12.00 usec
PL1          -1.60 dB
SFO1         400.1328009 MHz

F2 - Processing parameters
SI           65536
SF           400.1300267 MHz
WDW          no
SSB          0
LB           0.00 Hz
GB           0
PC           2.00

1D NMR plot parameters
CY           22.80 cm
CY           15.00 cm
F1P          9.000 ppm
F1           3601.17 Hz
F2P          -1.077 ppm
F2           -430.96 Hz
PPMCM        0.44198 ppm/cm
HZCM         176.84787 Hz/cm
    
```

# Z-restored spin-echo 13C spectrum with 1H decoupling

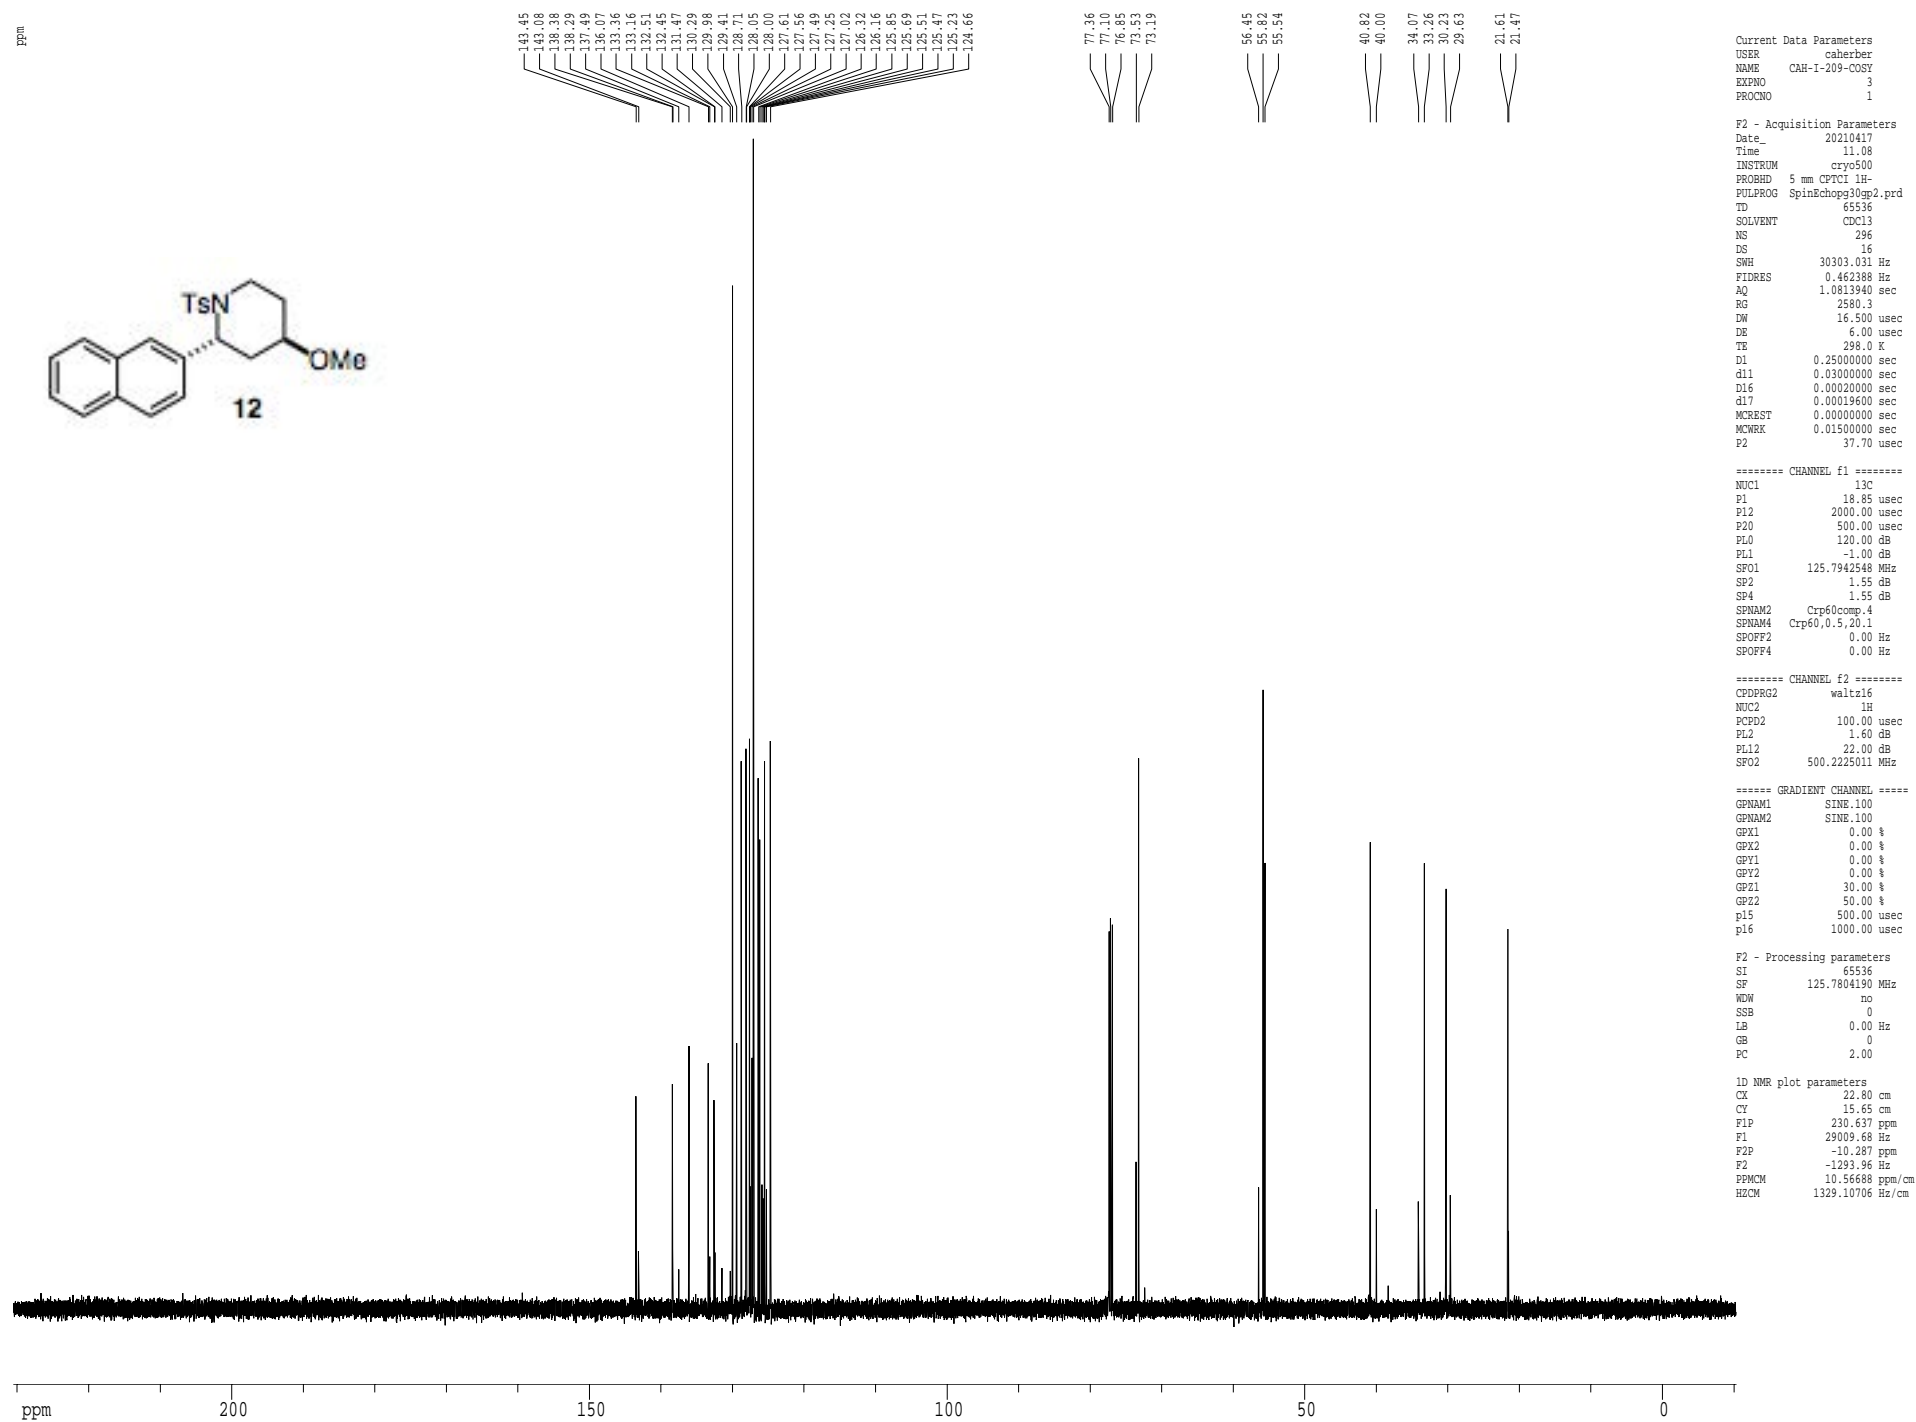

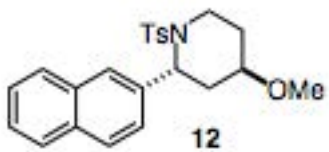

gcosy60

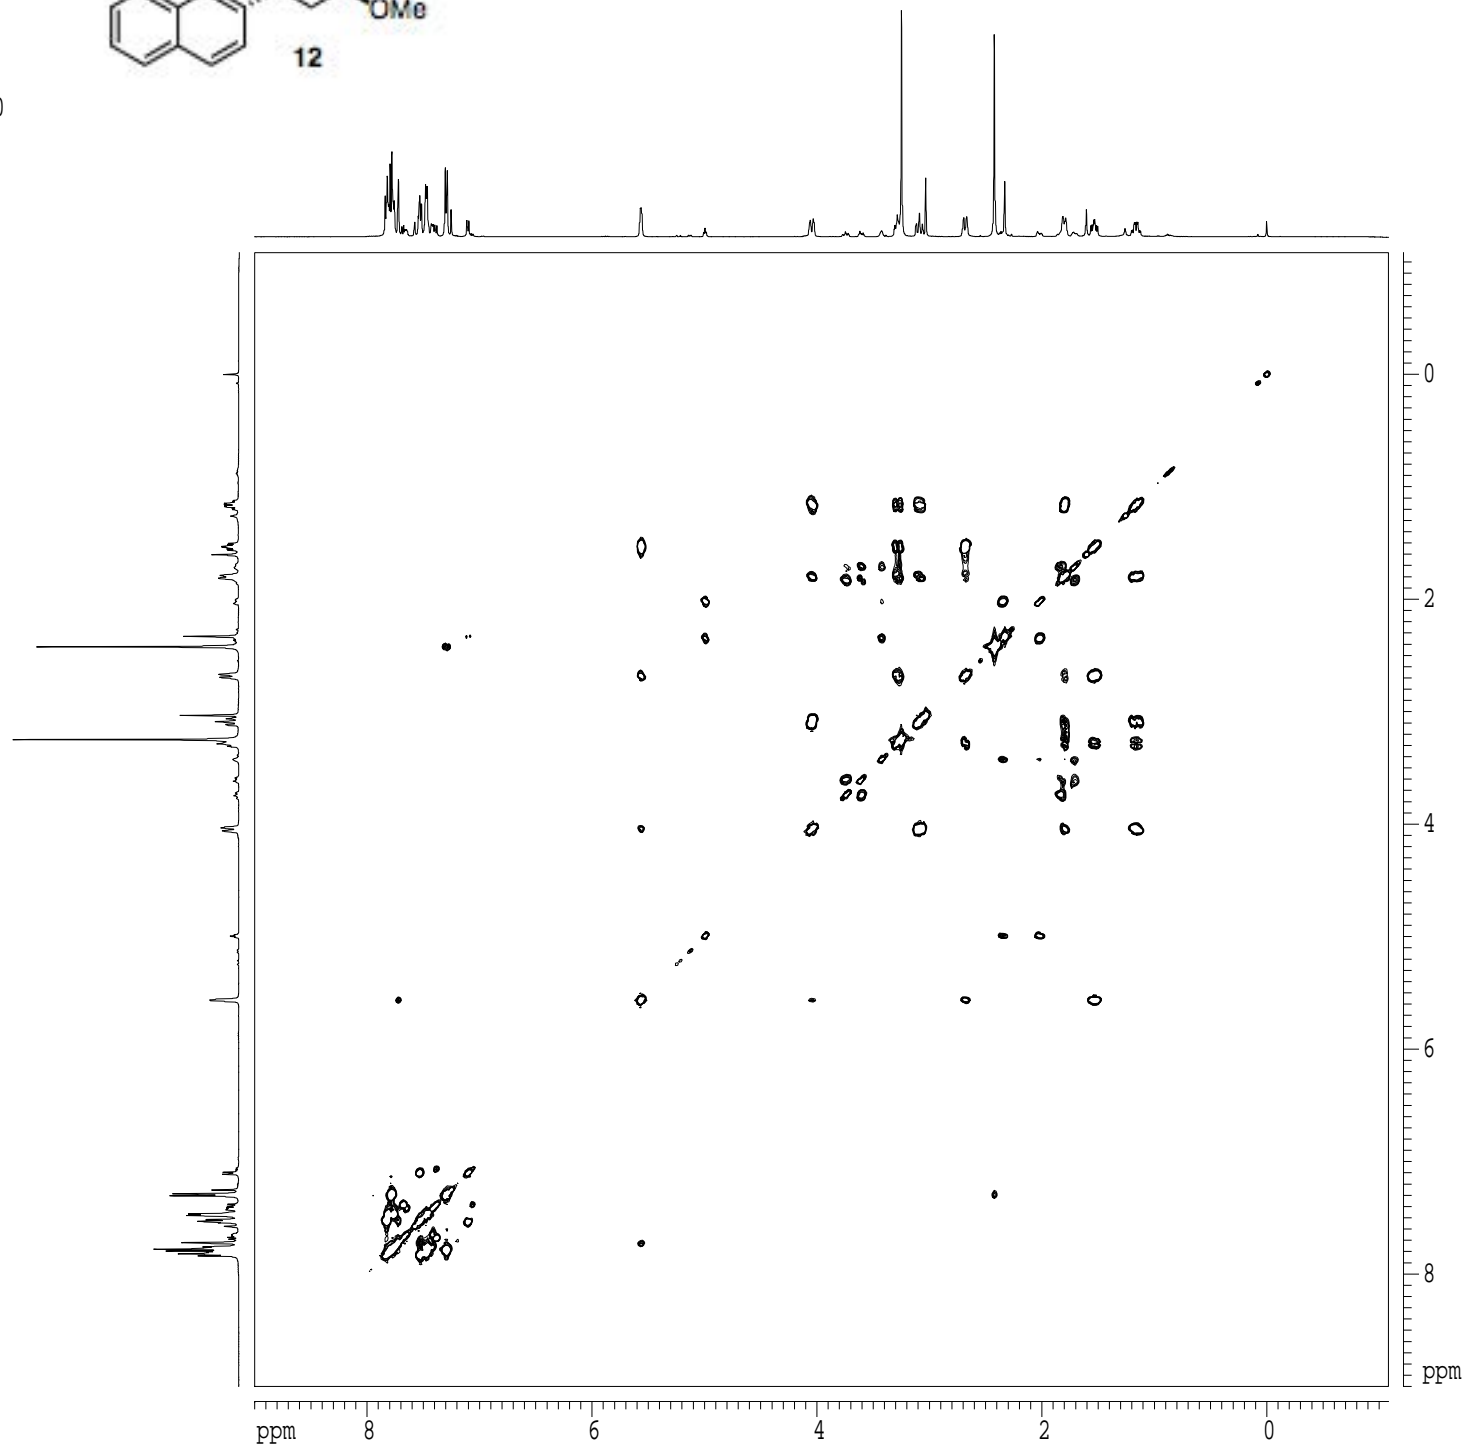

Current Data Parameters  
 USER caherber  
 NAME CAH-I-209-COSY  
 EXPNO 2  
 PROCNO 1

F2 - Acquisition Parameters  
 Date\_ 20210417  
 Time 10.51  
 INSTRUM cryo500  
 PROBHD 5 mm CPTCI 1H-  
 PULPROG cosygp60.prd  
 TD 2048  
 SOLVENT CDCl3  
 NS 1  
 DS 16  
 SWH 8012.820 Hz  
 FIDRES 3.912510 Hz  
 AQ 0.1278452 sec  
 RG 35.9  
 DW 62.400 usec  
 DE 6.00 usec  
 TE 298.0 K  
 d0 0.00000300 sec  
 D1 1.00000000 sec  
 d13 0.00000300 sec  
 D16 0.00020000 sec  
 IN0 0.00012480 sec

===== CHANNEL f1 =====  
 NUC1 1H  
 P1 9.75 usec  
 PL1 1.60 dB  
 SFO1 500.2235015 MHz

===== GRADIENT CHANNEL =====  
 GPNAM1 SMSQ10.100  
 GPNAM2 SMSQ10.100  
 GPX1 0.00 %  
 GPX2 0.00 %  
 GPY1 0.00 %  
 GPY2 0.00 %  
 GPZ1 17.00 %  
 GPZ2 17.00 %  
 P16 1000.00 usec

F1 - Acquisition parameters  
 ND0 1  
 TD 512  
 SFO1 500.2235 MHz  
 FIDRES 15.650040 Hz  
 SW 16.018 ppm  
 FhMODE QF

F2 - Processing parameters  
 SI 1024  
 SF 500.2200362 MHz  
 WDW SINE  
 SSB 0  
 LB 0.00 Hz  
 GB 0  
 PC 1.00

F1 - Processing parameters  
 SI 1024  
 MC2 QF  
 SF 500.2200362 MHz  
 WDW SINE  
 SSB 0  
 LB 0.00 Hz  
 GB 0

2D NMR plot parameters  
 CX2 15.00 cm  
 CX1 15.00 cm  
 F2PLO 9.000 ppm  
 F2LO 4501.98 Hz  
 F2PHI -1.082 ppm  
 F2HI -541.03 Hz  
 F1PLO 9.000 ppm  
 F1LO 4501.98 Hz  
 F1PHI -1.082 ppm  
 F1HI -541.03 Hz  
 F2PPMCM 0.67211 ppm/cm  
 F2HZCM 336.20062 Hz/cm  
 F1PPMCM 0.67211 ppm/cm  
 F1HZCM 336.20062 Hz/cm

gnoe

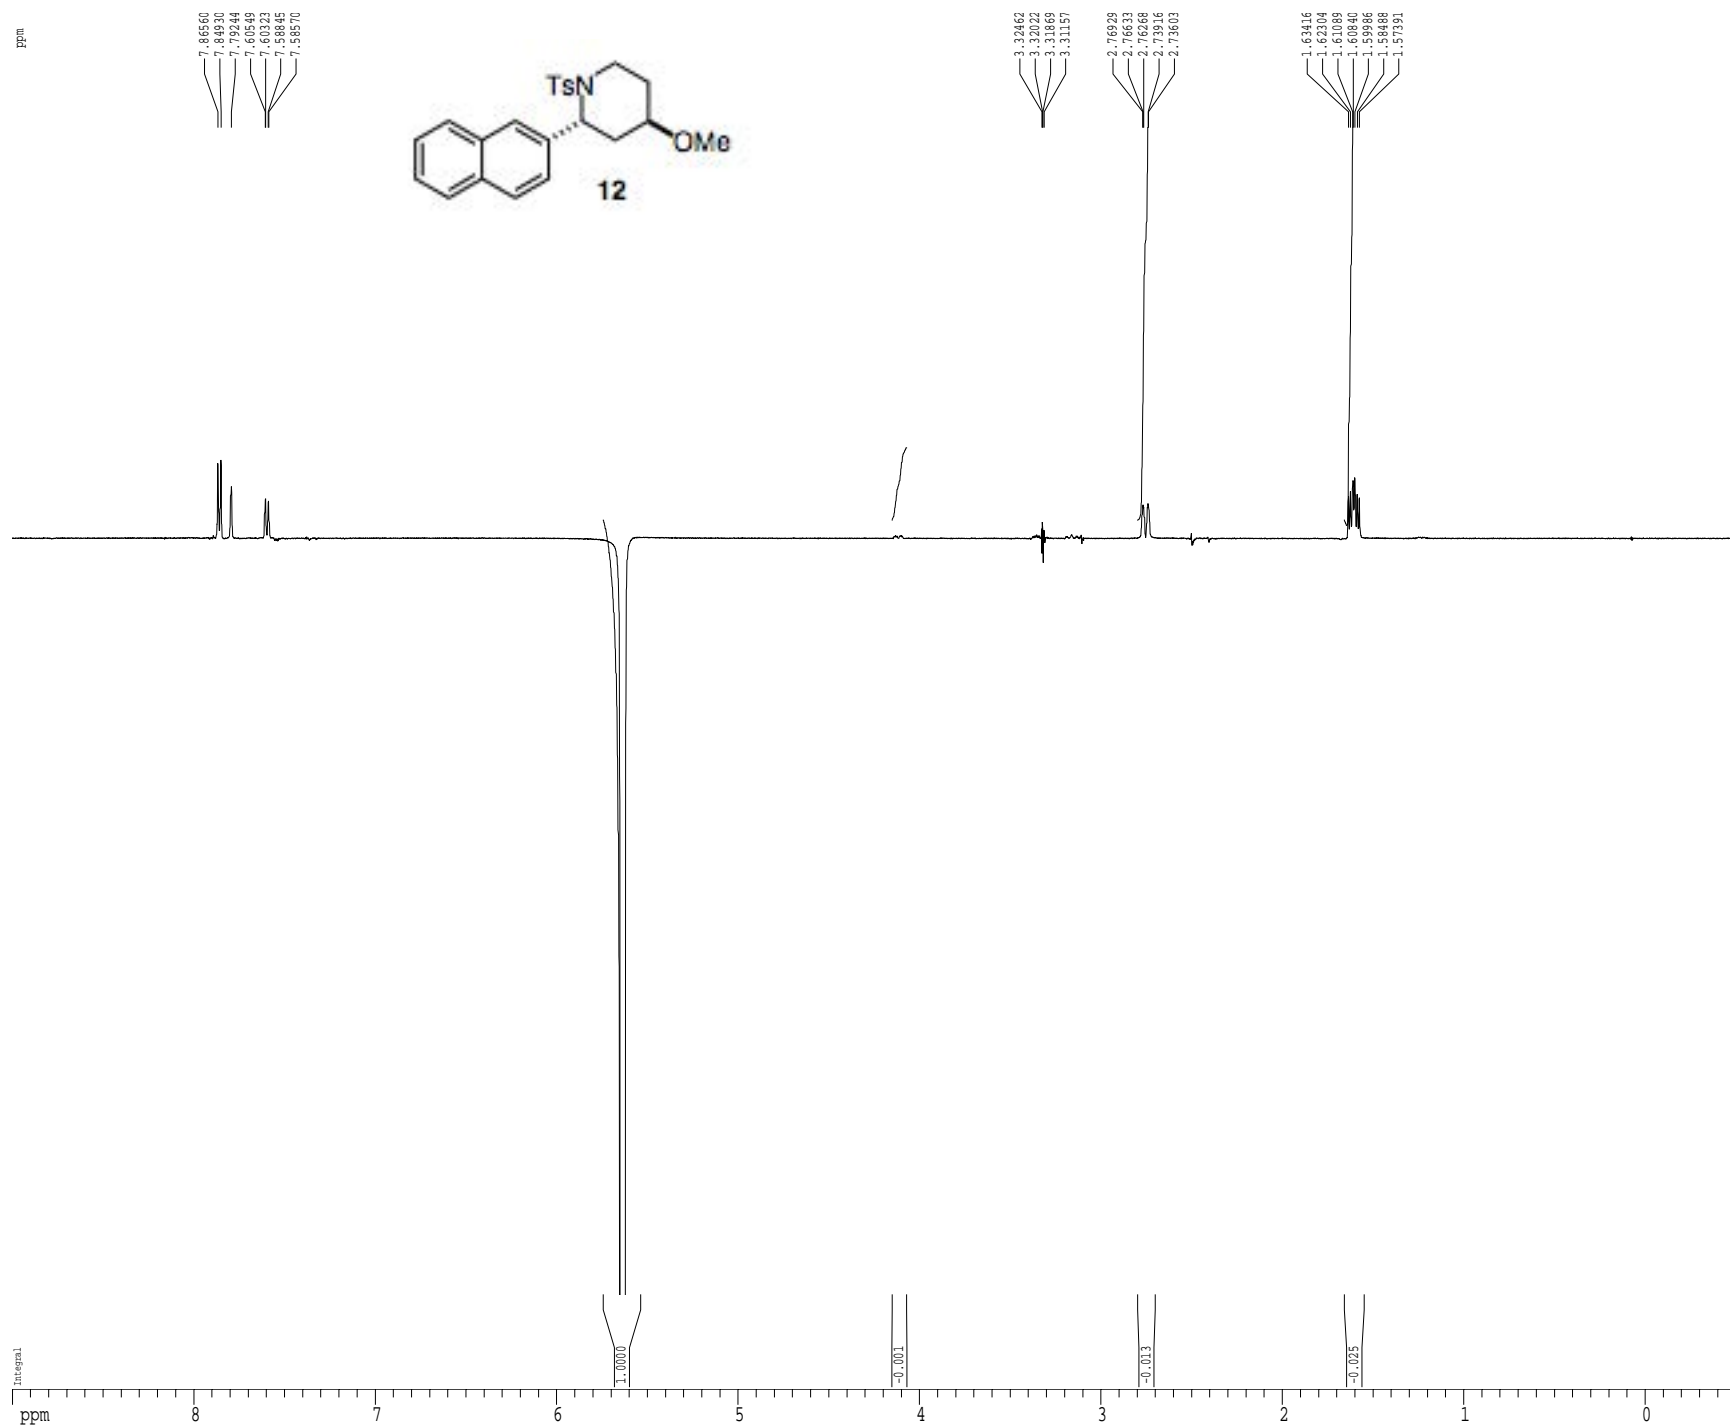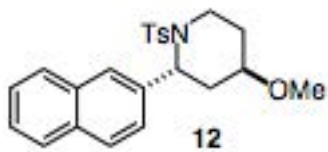

Current Data Parameters

|        |               |
|--------|---------------|
| USER   | caherber      |
| NAME   | CAH-I-209-noe |
| EXPNO  | 2             |
| PROCNO | 1             |

F2 - Acquisition Parameters

|         |                |
|---------|----------------|
| Date_   | 20210417       |
| Time    | 14.16          |
| INSTRUM | cryo500        |
| PROBHD  | 5 mm CPTCI 1H- |
| PULPROG | gnoe1cc22.prd  |
| TD      | 65536          |
| SOLVENT | CDCl3          |
| NS      | 128            |
| DS      | 8              |
| SWH     | 8012.820 Hz    |
| FIDRES  | 0.122266 Hz    |
| AQ      | 4.0894966 sec  |
| RG      | 80.6           |
| DW      | 62.400 usec    |
| DE      | 6.00 usec      |
| TE      | 298.0 K        |
| D1      | 1.00000000 sec |
| D8      | 0.50000000 sec |
| D16     | 0.00020000 sec |
| d21     | 0.33375451 sec |
| d22     | 0.16399699 sec |
| p2      | 19.50 usec     |

===== CHANNEL f1 =====

|        |                 |
|--------|-----------------|
| NUC1   | 1H              |
| P1     | 9.75 usec       |
| p3     | 29.25 usec      |
| p4     | 39.00 usec      |
| p5     | 26.00 usec      |
| P29    | 40000.00 usec   |
| PL1    | 1.60 dB         |
| SFO1   | 500.2228198 MHz |
| SP9    | 60.00 dB        |
| SPNAM9 | gauss1.512      |
| SPOFF9 | 0.00 Hz         |

===== GRADIENT CHANNEL =====

|        |              |
|--------|--------------|
| GPNAM1 | SMSQ10.100   |
| GPNAM2 | SMSQ10.100   |
| GPNAM3 | SMSQ10.100   |
| GPNAM4 | SMSQ10.100   |
| GPX1   | 0.00 %       |
| GPX2   | 0.00 %       |
| GPX3   | 0.00 %       |
| GPX4   | 0.00 %       |
| GPY1   | 0.00 %       |
| GPY2   | 0.00 %       |
| GPY3   | 0.00 %       |
| GPY4   | 0.00 %       |
| GPZ1   | 7.00 %       |
| GPZ2   | 3.00 %       |
| GPZ3   | 2.30 %       |
| GPZ4   | -2.30 %      |
| P16    | 1000.00 usec |

F2 - Processing parameters

|     |                 |
|-----|-----------------|
| SI  | 65536           |
| SF  | 500.2200000 MHz |
| WDW | no              |
| SSB | 0               |
| LB  | 0.00 Hz         |
| GB  | 0               |
| PC  | 1.00            |

1D NMR plot parameters

|       |                 |
|-------|-----------------|
| CX    | 22.80 cm        |
| CY    | 50.00 cm        |
| F1P   | 9.000 ppm       |
| F1    | 4501.98 Hz      |
| F2P   | -0.500 ppm      |
| F2    | -250.11 Hz      |
| PPMCM | 0.41667 ppm/cm  |
| HZCM  | 208.42500 Hz/cm |

# <sup>1</sup>H spectrum

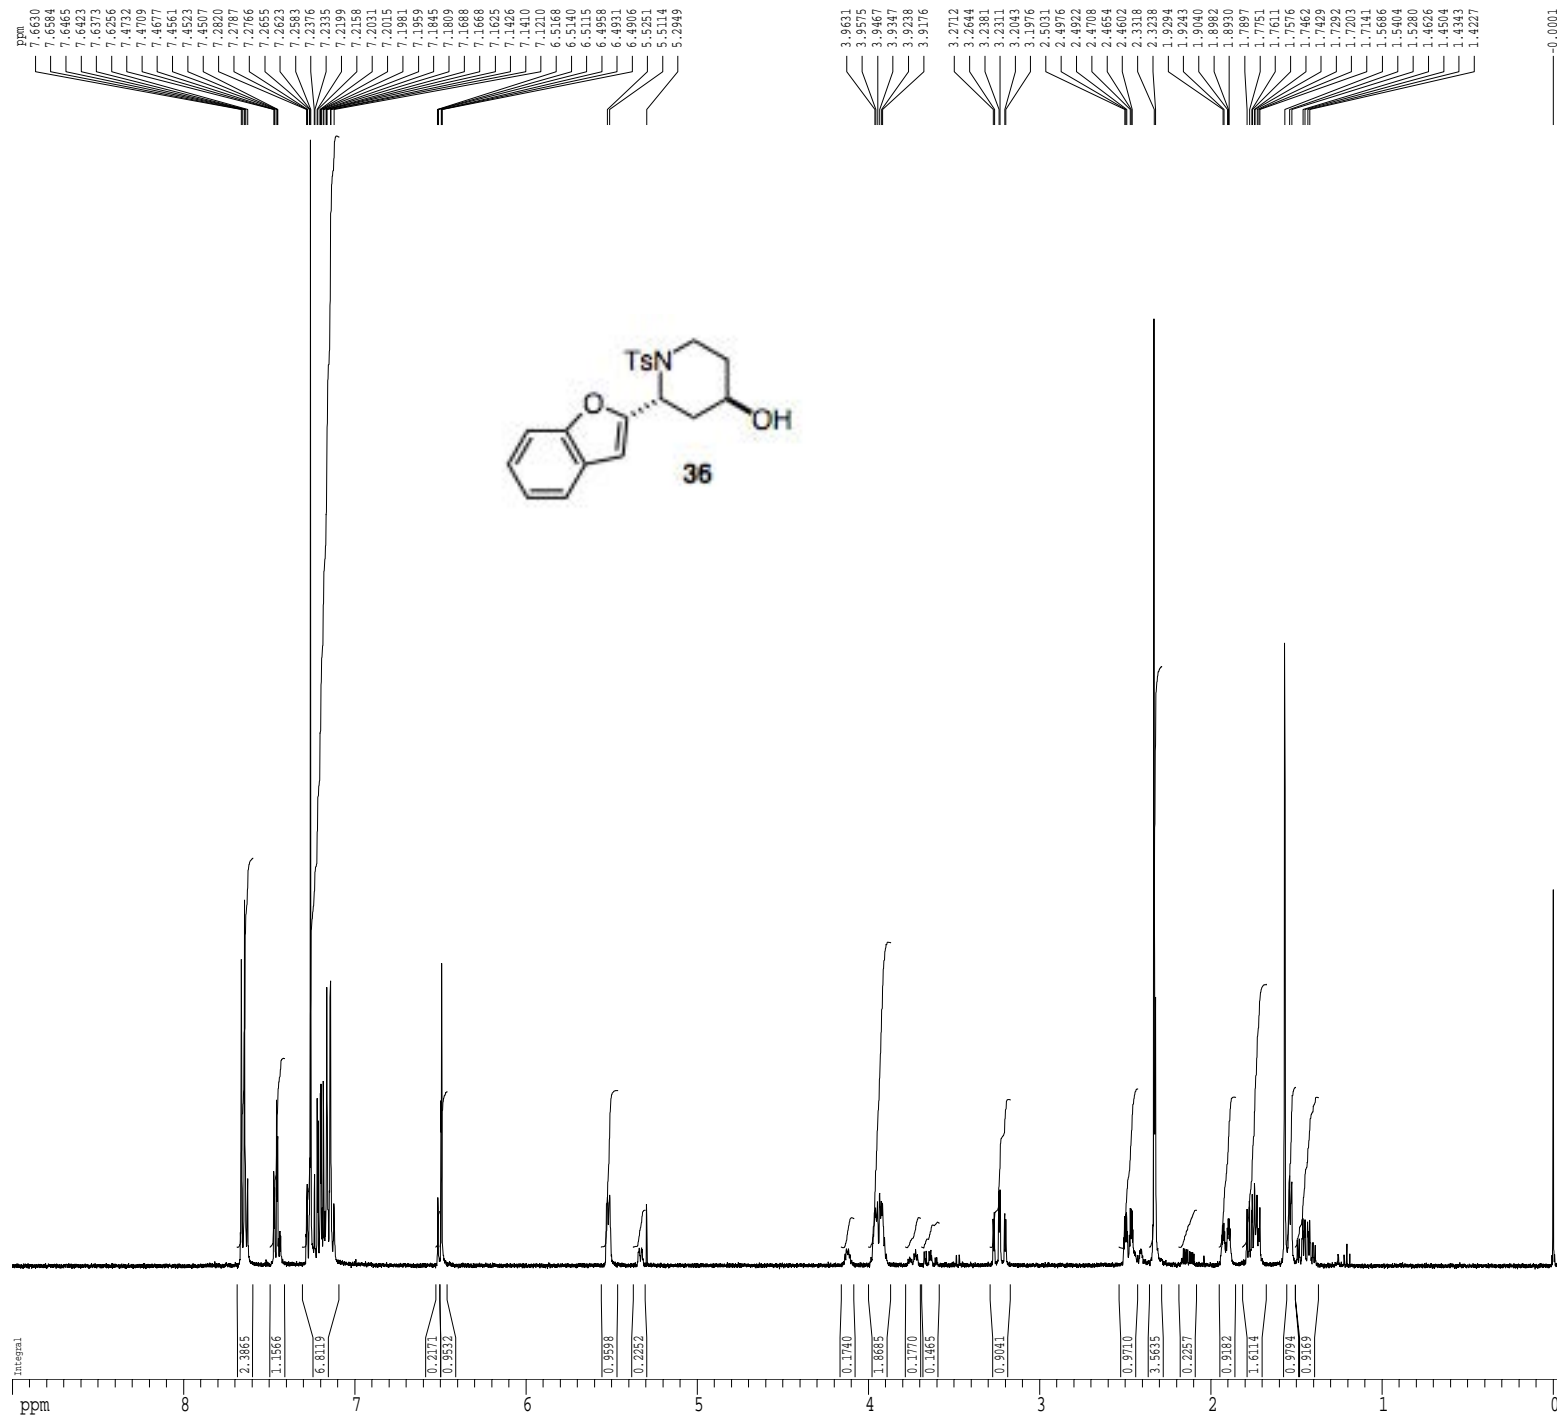

Current Data Parameters

|        |           |
|--------|-----------|
| USER   | caherber  |
| NAME   | CAH-I-215 |
| EXPNO  | 2         |
| PROCNO | 1         |

F2 - Acquisition Parameters

|         |                |
|---------|----------------|
| Date_   | 20210503       |
| Time    | 13.54          |
| INSTRUM | drx400         |
| PROBHD  | 5 mm QNP H/P/P |
| PULPROG | zg30           |
| TD      | 65536          |
| SOLVENT | CDCl3          |
| NS      | 8              |
| DS      | 2              |
| SWH     | 6410.256 Hz    |
| FIDRES  | 0.097813 Hz    |
| AQ      | 5.1118579 sec  |
| RG      | 512            |
| DW      | 78.000 usec    |
| DE      | 4.50 usec      |
| TE      | 298.0 K        |
| D1      | 0.10000000 sec |
| MCREST  | 0.00000000 sec |
| MCWRK   | 0.01500000 sec |

===== CHANNEL f1 =====

|      |                 |
|------|-----------------|
| NUC1 | 1H              |
| P1   | 12.00 usec      |
| PL1  | -1.60 dB        |
| SFO1 | 400.1328009 MHz |

F2 - Processing parameters

|     |                 |
|-----|-----------------|
| SI  | 65536           |
| SF  | 400.1300223 MHz |
| WDW | no              |
| SSB | 0               |
| LB  | 0.00 Hz         |
| GB  | 0               |
| PC  | 2.00            |

1D NMR plot parameters

|       |                 |
|-------|-----------------|
| CY    | 22.80 cm        |
| CY    | 15.00 cm        |
| F1P   | 9.000 ppm       |
| F1    | 3601.17 Hz      |
| F2P   | -1.066 ppm      |
| F2    | -426.56 Hz      |
| PPMCM | 0.44149 ppm/cm  |
| HZCM  | 176.65485 Hz/cm |

[illegible]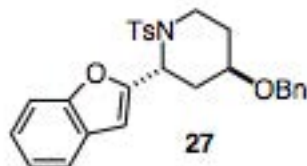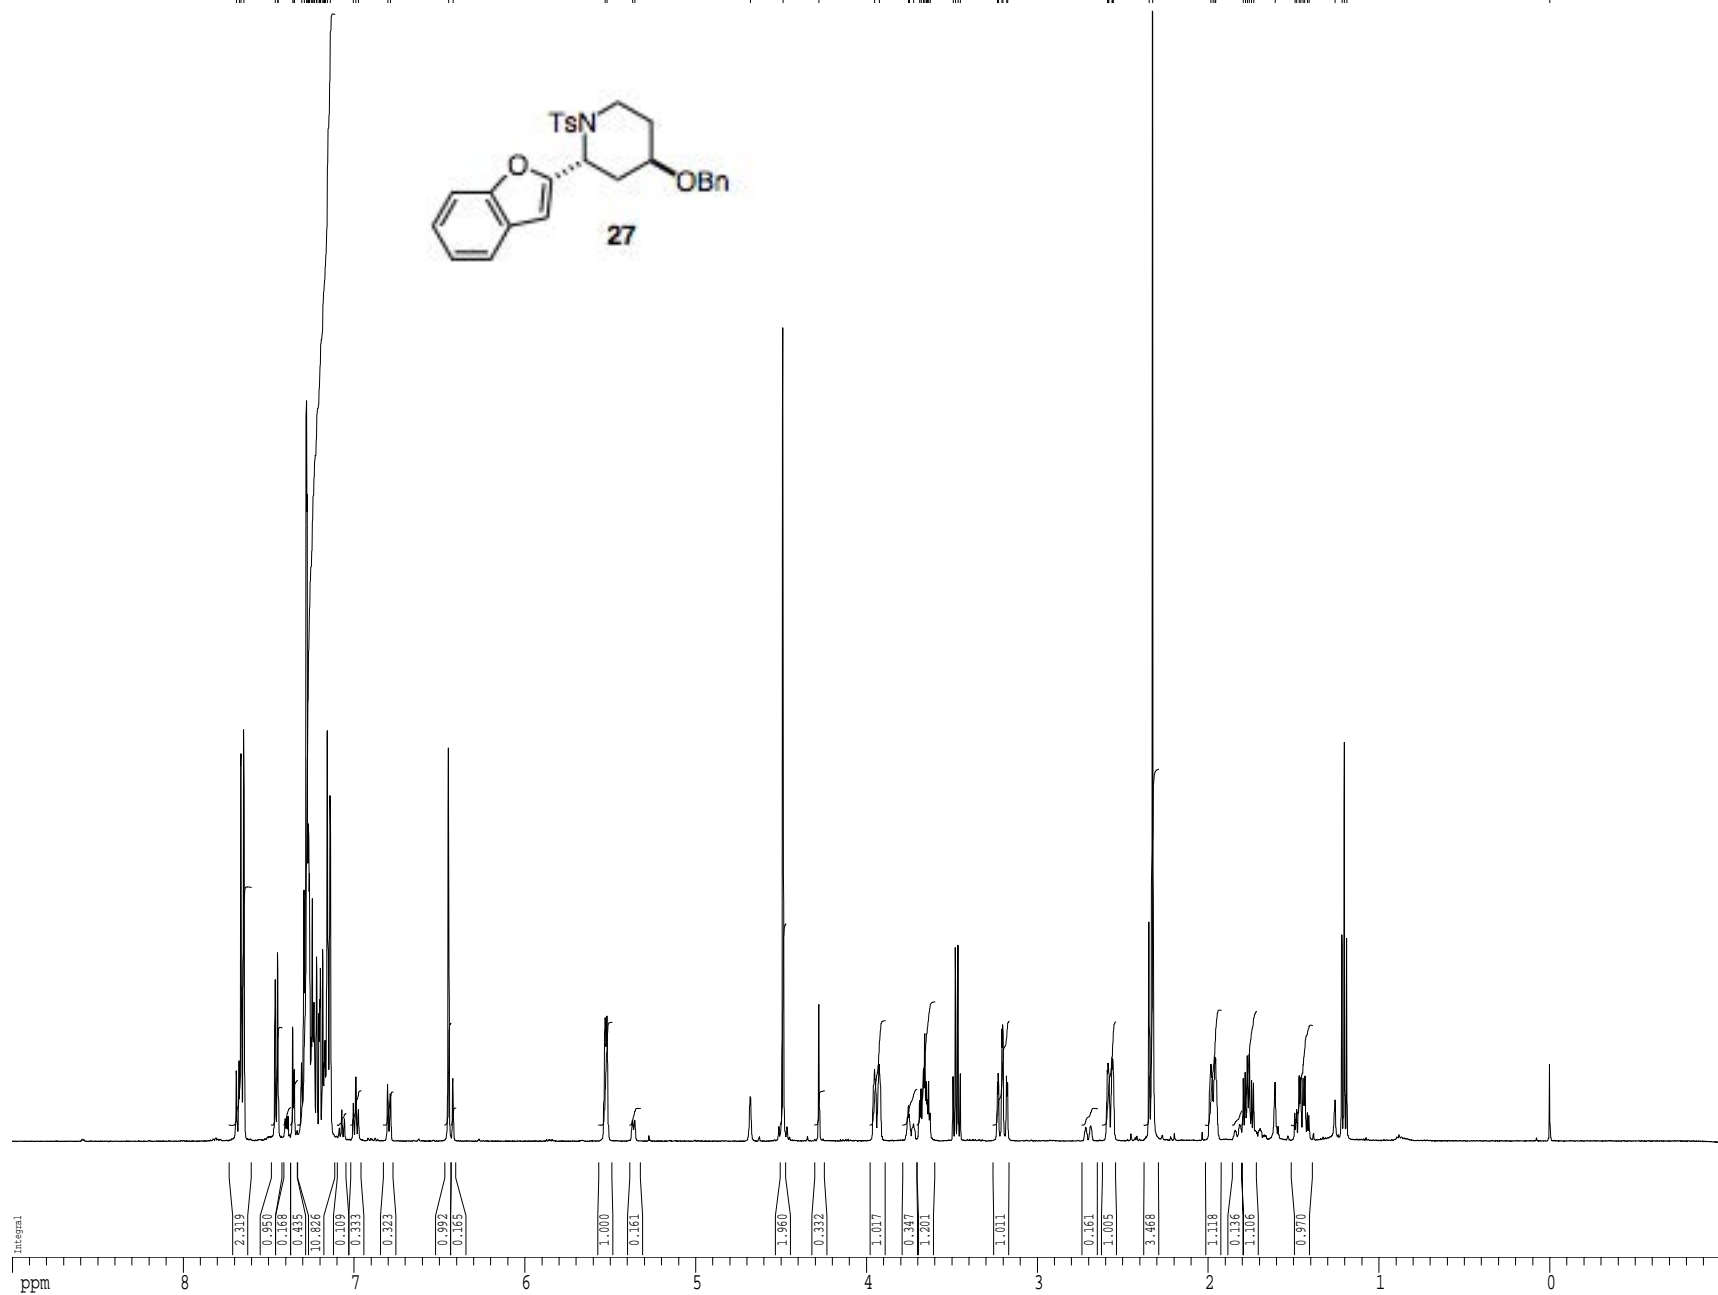

```

Current Data Parameters
=====
USER          caherber
NAME          CAH-I-220-full
EXPNO         1
PROCNO        1

F2 - Acquisition Parameters
=====
Date_         20210506
Time          17.24
INSTRUM       cryo500
PROBHD        5 mm CPTCI 1H-
PULPROG       zg30
TD            48074
SOLVENT       CDCl3
NS            8
DS            2
SWH           8012.820 Hz
FIDRES        0.166677 Hz
AQ            2.9998677 sec
RG            4
DW            62.400 usec
DE            6.00 usec
TE            298.0 K
D1            0.10000000 sec
MCREST        0.00000000 sec
MCWRK        0.01500000 sec

***** CHANNEL f1 *****
NUC1          1H
P1            9.75 usec
PL1           1.60 dB
SFO1         500.223015 MHz

F2 - Processing parameters
=====
SI            65536
SF            500.2200401 MHz
WDW           no
SSB           0
LB            0.00 Hz
GB            0
PC            1.00

1D NMR plot parameters
=====
CX            22.80 cm
CY            15.00 cm
F1P           9.000 ppm
F1            4501.98 Hz
F2P           -1.089 ppm
F2            -544.94 Hz
PFMCM         0.44252 ppm/cm
HZCM          221.35622 Hz/cm

```



Z-restored spin-echo 13C spectrum with 1H decoupling

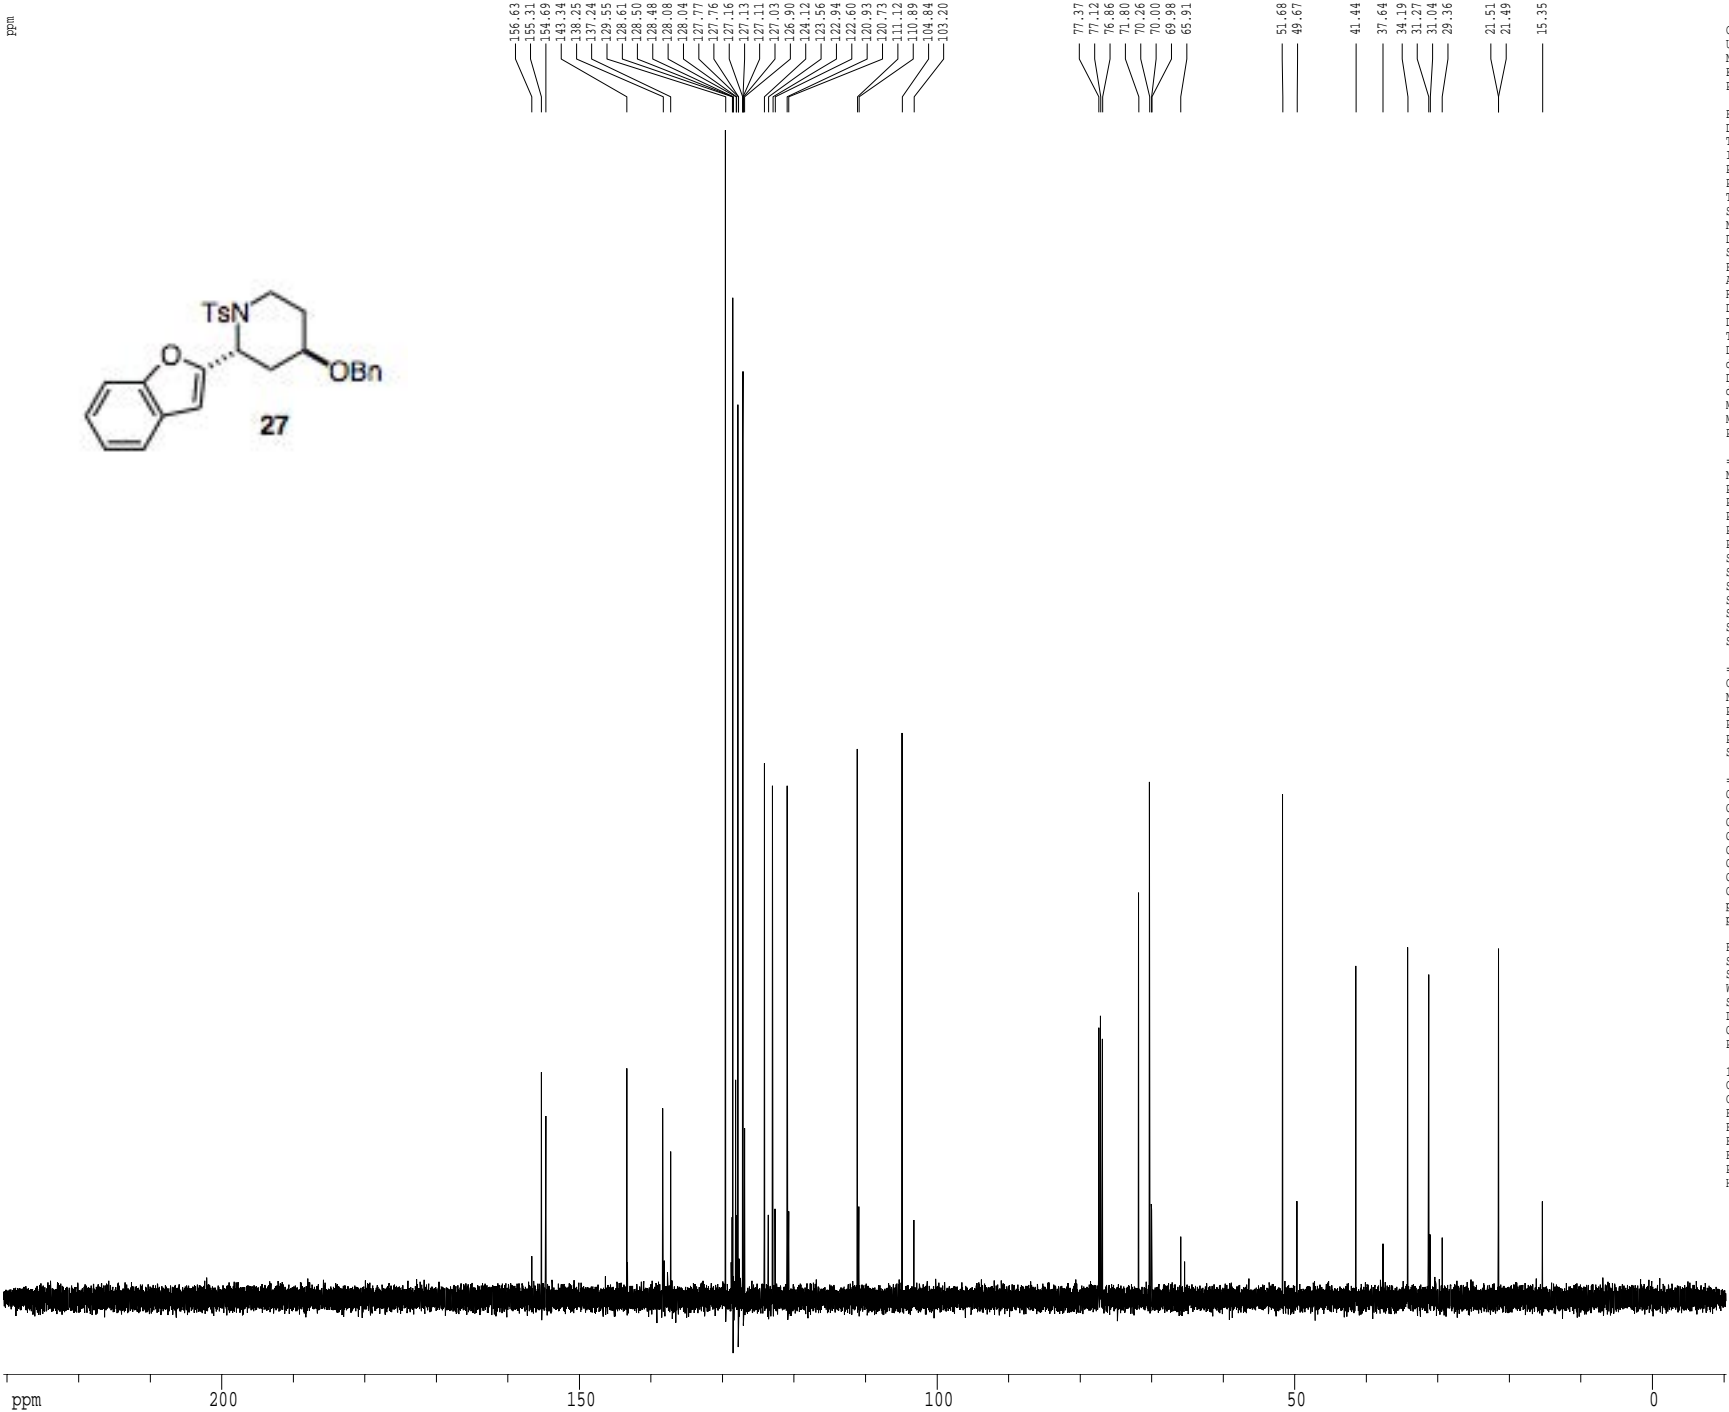

Current Data Parameters

USER caherber  
NAME CAH-I-220-full  
EXPNO 5  
PROCNO 1

F2 - Acquisition Parameters

Date\_ 20210506  
Time 18.09  
INSTRUM cryo500  
PROBHD 5 mm CPTCI 1H-  
PULPROG SpinEchopg30gp2.prd  
TD 65536  
SOLVENT CDCl3  
NS 96  
DS 16  
SWH 30303.031 Hz  
FIDRES 0.462388 Hz  
AQ 1.0813940 sec  
RG 4096  
DW 16.500 usec  
DE 6.00 usec  
TE 298.0 K  
D1 0.25000000 sec  
d11 0.03000000 sec  
D16 0.00020000 sec  
d17 0.00019600 sec  
MCREST 0.00000000 sec  
MCMX 0.01500000 sec  
P2 37.70 usec

===== CHANNEL f1 =====

NUC1 13C  
P1 18.85 usec  
P12 2000.00 usec  
P20 500.00 usec  
PL0 120.00 dB  
PL1 -1.00 dB  
SP01 125.7942548 MHz  
SP2 1.55 dB  
SP4 1.55 dB  
SPNAM2 Crp60comp.4  
SPNAM4 Crp60,0.5,20.1  
SPOFF2 0.00 Hz  
SPOFF4 0.00 Hz

===== CHANNEL f2 =====

CPDPRG2 waltz16  
NUC2 1H  
PCPD2 100.00 usec  
PL2 1.60 dB  
PL12 22.00 dB  
SP02 500.2225011 MHz

===== GRADIENT CHANNEL =====

GPAM1 SINE.100  
GPAM2 SINE.100  
GPX1 0.00 %  
GPX2 0.00 %  
GPY1 0.00 %  
GPY2 0.00 %  
GPZ1 30.00 %  
GPZ2 50.00 %  
p15 500.00 usec  
p16 1000.00 usec

F2 - Processing parameters

SI 65536  
SF 125.7804190 MHz  
WDW no  
SSB 0  
LB 0.00 Hz  
GB 0  
PC 2.00

1D NMR plot parameters

CX 22.80 cm  
CY 15.65 cm  
F1P 230.637 ppm  
F1 29009.68 Hz  
F2P -10.287 ppm  
F2 -1293.96 Hz  
PPMCM 10.56688 ppm/cm  
HZCM 1329.10706 Hz/cm

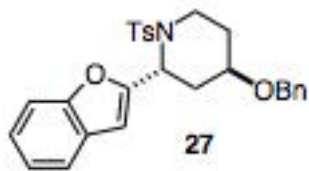

gcosy60

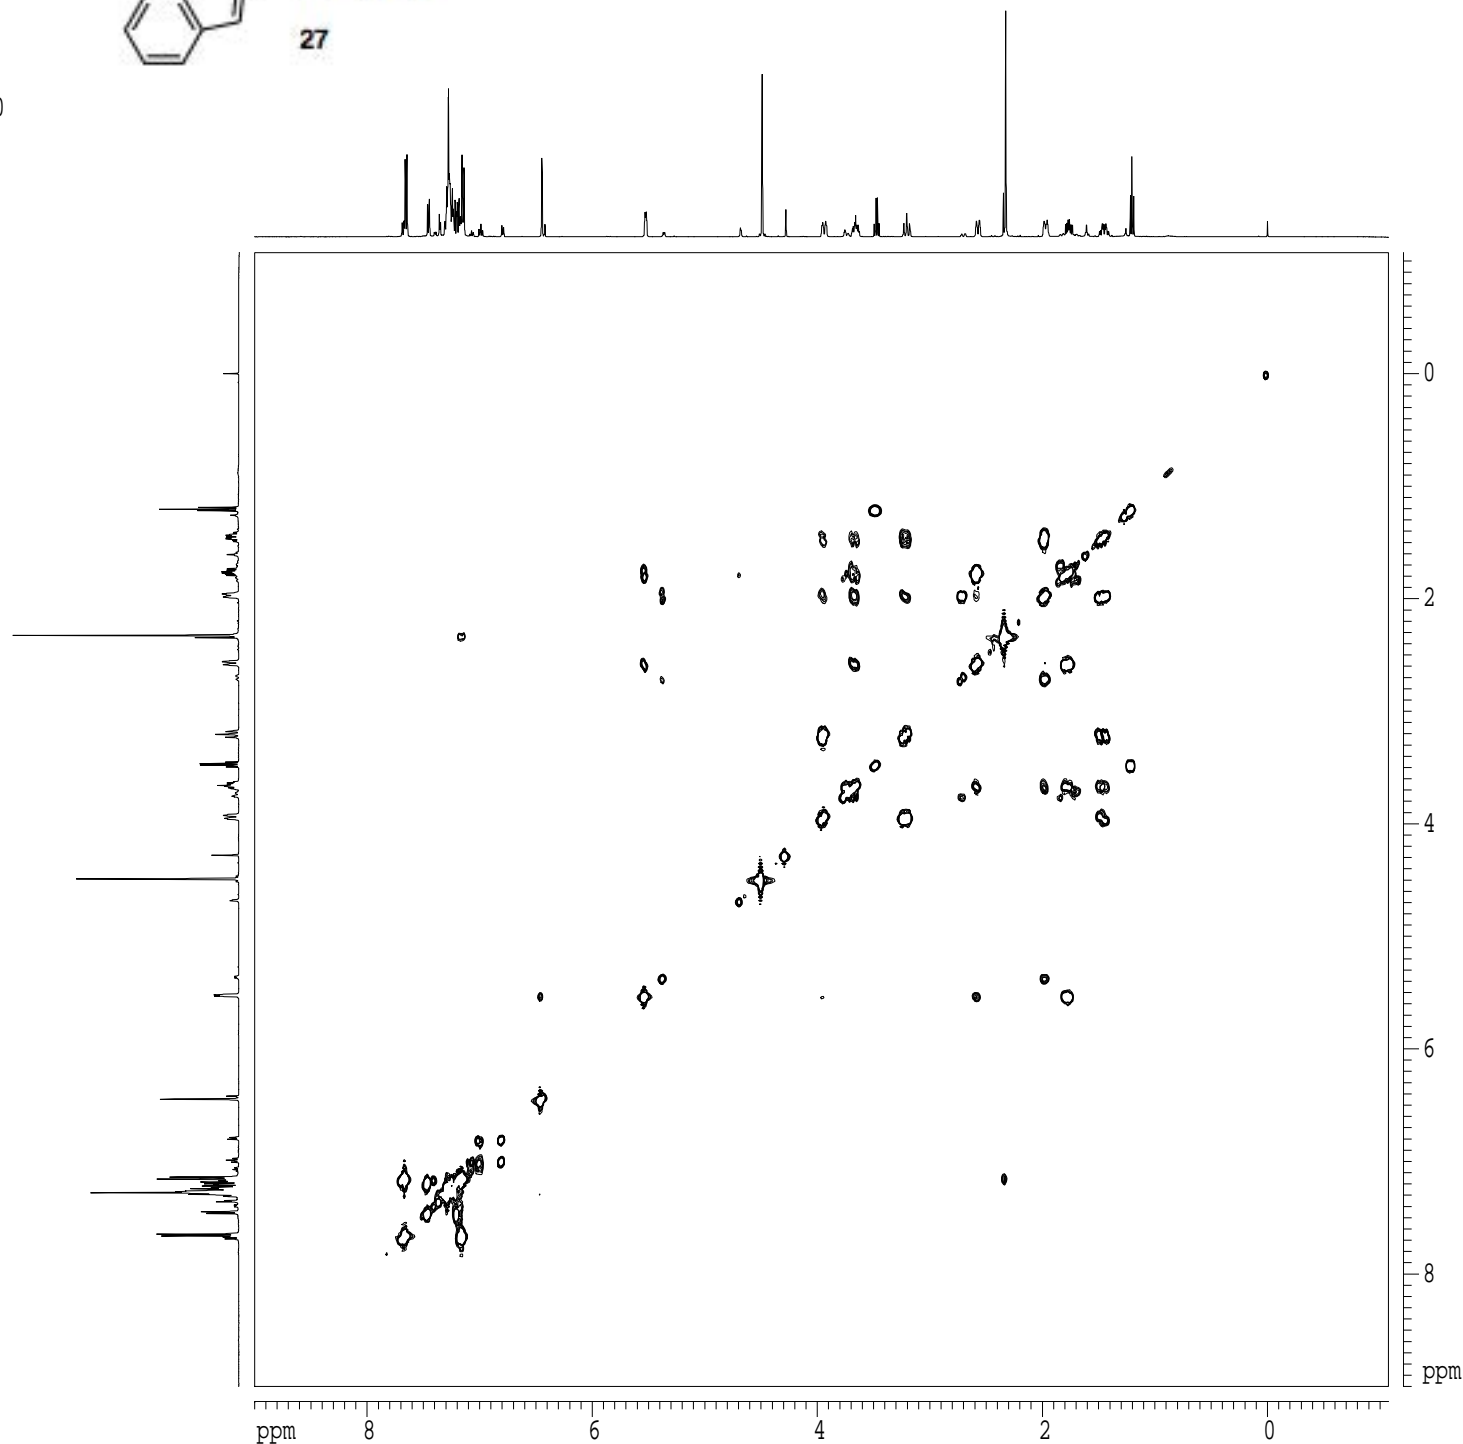

Current Data Parameters  
 USER caherber  
 NAME CAH-I-220-full  
 EXPNO 2  
 PROCNO 1

F2 - Acquisition Parameters  
 Date\_ 20210506  
 Time 17.27  
 INSTRUM cryo500  
 PROBHD 5 mm CPTCI 1H-  
 PULPROG cosygp60.prd  
 TD 2048  
 SOLVENT CDCl3  
 NS 2  
 DS 16  
 SWH 8012.820 Hz  
 FIDRES 3.912510 Hz  
 AQ 0.1278452 sec  
 RG 35.9  
 DW 62.400 usec  
 DE 6.00 usec  
 TE 298.0 K  
 d0 0.00000300 sec  
 D1 1.00000000 sec  
 d13 0.00000300 sec  
 D16 0.00020000 sec  
 IN0 0.00012480 sec

===== CHANNEL f1 =====  
 NUC1 1H  
 P1 9.75 usec  
 PL1 1.60 dB  
 SFO1 500.2235015 MHz

===== GRADIENT CHANNEL =====  
 GPNAM1 SMSQ10.100  
 GPNAM2 SMSQ10.100  
 GPX1 0.00 %  
 GPX2 0.00 %  
 GPY1 0.00 %  
 GPY2 0.00 %  
 GPZ1 17.00 %  
 GPZ2 17.00 %  
 P16 1000.00 usec

F1 - Acquisition parameters  
 ND0 1  
 TD 269  
 SFO1 500.2235 MHz  
 FIDRES 29.787437 Hz  
 SW 16.018 ppm  
 FhMODE QF

F2 - Processing parameters  
 SI 1024  
 SF 500.2200329 MHz  
 WDW SINE  
 SSB 0  
 LB 0.00 Hz  
 GB 0  
 PC 1.00

F1 - Processing parameters  
 SI 1024  
 MC2 QF  
 SF 500.2200329 MHz  
 WDW SINE  
 SSB 0  
 LB 0.00 Hz  
 GB 0

2D NMR plot parameters  
 CX2 15.00 cm  
 CX1 15.00 cm  
 F2PLO 9.000 ppm  
 F2LO 4501.98 Hz  
 F2PHI -1.075 ppm  
 F2HI -537.73 Hz  
 F1PLO 9.000 ppm  
 F1LO 4501.98 Hz  
 F1PHI -1.075 ppm  
 F1HI -537.73 Hz  
 F2PPMCM 0.67167 ppm/cm  
 F2HZCM 335.98087 Hz/cm  
 F1PPMCM 0.67167 ppm/cm  
 F1HZCM 335.98087 Hz/cm

gnoe

ppm

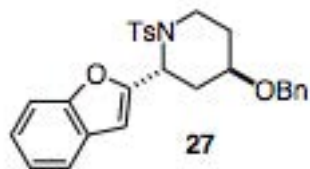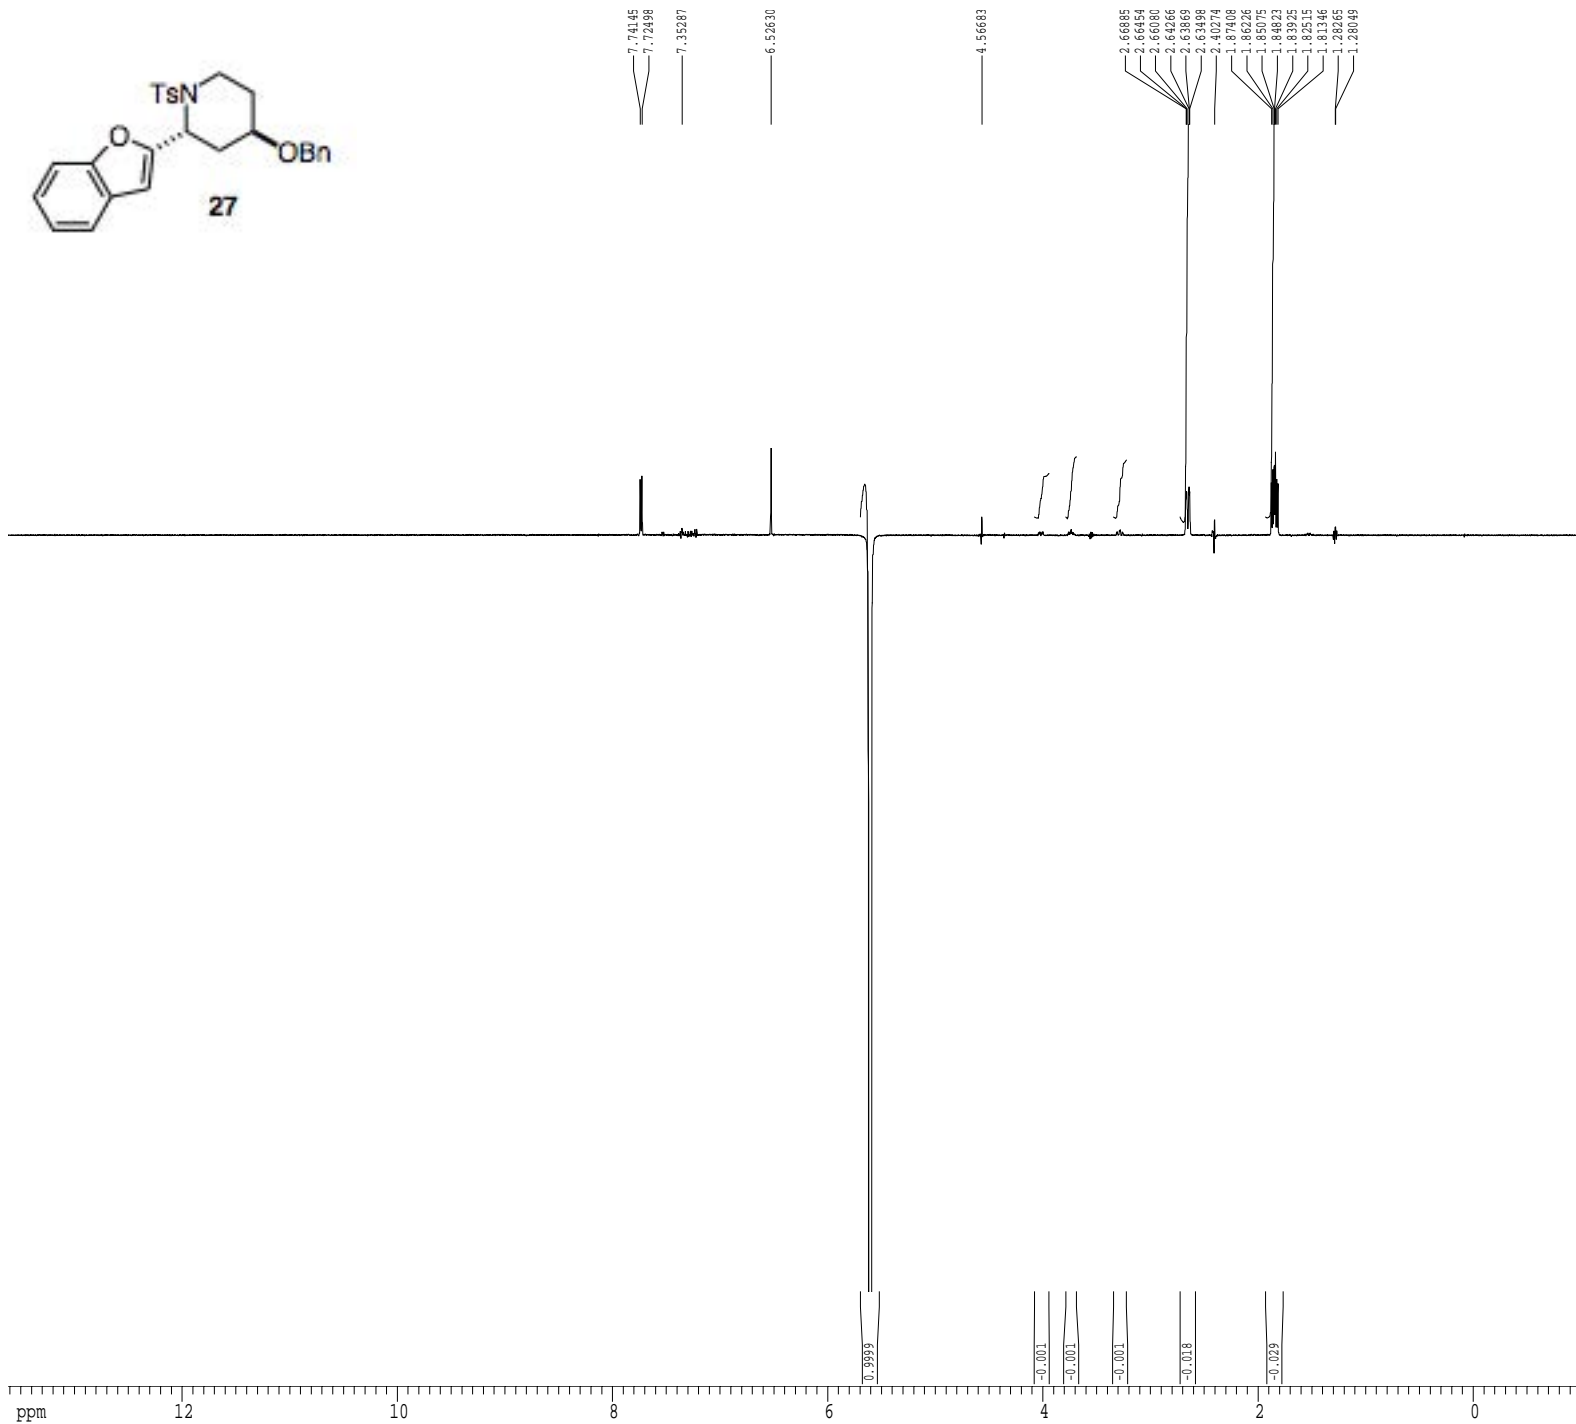

Current Data Parameters  
 USER caherber  
 NAME CAH-I-220-full  
 EXPNO 3  
 PROCNO 1

F2 - Acquisition Parameters  
 Date\_ 20210506  
 Time 17.52  
 INSTRUM cryo500  
 PROBRD 5 mm CPTCI 1H-  
 PULPROG gnoe1cc22.prd  
 TD 65536  
 SOLVENT CDCl3  
 NS 128  
 DS 8  
 SNH 8012.820 Hz  
 FIDRES 0.122266 Hz  
 AQ 4.0894966 sec  
 RG 90.5  
 DW 62.400 usec  
 DE 6.00 usec  
 TE 298.0 K  
 D1 1.00000000 sec  
 D8 0.50000000 sec  
 D16 0.00020000 sec  
 d21 0.33375451 sec  
 d22 0.16399699 sec  
 p2 19.50 usec

===== CHANNEL f1 =====  
 NUC1 1H  
 P1 9.75 usec  
 p3 29.25 usec  
 p4 39.00 usec  
 p5 26.00 usec  
 P29 40000.00 usec  
 PL1 1.60 dB  
 SF01 500.228033 MHz  
 SP9 60.00 dB  
 SPNAM9 gauss1.512  
 SPOFF9 0.00 Hz

===== GRADIENT CHANNEL =====  
 GPNAM1 SMSQ10.100  
 GPNAM2 SMSQ10.100  
 GPNAM3 SMSQ10.100  
 GPNAM4 SMSQ10.100  
 GPX1 0.00 %  
 GPX2 0.00 %  
 GPX3 0.00 %  
 GPX4 0.00 %  
 GPY1 0.00 %  
 GPY2 0.00 %  
 GPY3 0.00 %  
 GPY4 0.00 %  
 GPZ1 7.00 %  
 GPZ2 3.00 %  
 GPZ3 2.30 %  
 GPZ4 -2.30 %  
 P16 1000.00 usec

F2 - Processing parameters  
 SI 65536  
 SF 500.2200000 MHz  
 WDW no  
 SSB 0  
 LB 0.00 Hz  
 GB 0  
 PC 1.00

1D NMR plot parameters  
 CX 22.80 cm  
 CY 50.00 cm  
 F1P 15.009 ppm  
 F1 7507.95 Hz  
 F2P -1.009 ppm  
 F2 -504.87 Hz  
 PPMCM 0.70257 ppm/cm  
 HZCM 351.43951 Hz/cm
